# Supplementary material for: Transcriptome Analysis of Recurrently Deregulated Genes across Multiple Cancers Identifies New Pan-Cancer Biomarkers
Source: Oxford University Press journal article supplement (doi:10.1158/0008-5472.can-15-0484), 2015-11-09
Supplement: 00085472can150484-sup-145596_2_supp_3145138_n7pkmp.xlsx [file 00085472can150484-sup-145596_2_supp_3145138_n7pkmp.xlsx]

## Sheet: 1A
Supplementary Table 1A The overview of paired cancer vs. normal origins and number of samples represented within FANTOM5 CAGE data collection.
	Cancer (Cell lines)	Normal Primary cells
Lymphoid	23	48
Myeloid	28	26
Bone	4	5
Brain	10	11
Kidney	7	13
Liver	5	3
Lung	16	8
Melanocyte	2	4
Mesothelium	16	3
Breast	3	3
Prostate	2	3
Ovary	7	12
Unmatched	102	200
Total	225	339	564

## Sheet: 1B
Supplementary Table 1B The overview of TCGA cancer types and number of samples for which RNA-seq data were available (August, 5, 2013)
TCGA Name	Cancer Type	Primary cancers	Normal tissues
BLCA	Bladder Urothelial Carcinoma	151	16
BRCA	Breast invasive carcinoma	934	92
COAD	Colon adenocarcinoma	217	21
HNSC	Head and Neck squamous cell carcinoma	303	37
KICH	Kidney Chromophobe	66	25
KIRC	Kidney renal clear cell carcinoma	480	71
KIRP	Kidney renal papillary cell carcinoma	106	25
LIHC	Liver hepatocellular carcinoma	103	49
LUAD	Lung adenocarcinoma	431	57
LUSC	Lung squamous cell carcinoma	409	50
PRAD	Prostate adenocarcinoma	177	43
READ	Rectum adenocarcinoma	78	5
THCA	Thyroid carcinoma	496	56
UCEC	Uterine Corpus Endometrial Carcinoma	104	16
Total		4055	563

## Sheet: 1C
Supplementary Table 1C List of all samples from FANTOM5 CAGE data collection that was used in our differential expression pipeline for Pan Cancer Biomarker Candidates
category	Actual.id	Updated.description.for.COMPLETED.samples	simple.description	tissue	cell.type	exp_factor	exp_factor2
cell lines	CNhs11279	osteosarcoma cell line:143B/TK^(-)neo^(R)	osteosarcoma cell line:143B/TK^(-)neo^(R)	bone	osteoblast	bone.cancer	cancer_matched_solid
cell lines	CNhs11290	osteosarcoma cell line:HS-Os-1	osteosarcoma cell line:HS-Os-1	bone	osteoblast	bone.cancer	cancer_matched_solid
cell lines	CNhs11835	osteoclastoma cell line:Hs 706.T	osteoclastoma cell line:Hs 706.T	bone	osteoclast	bone.cancer	cancer_matched_solid
cell lines	CNhs11836	Ewing's sarcoma cell line:Hs 863.T	Ewing's sarcoma cell line:Hs 863.T	bone	osteoblast	bone.cancer	cancer_matched_solid
cell lines	CNhs10731	glioma cell line:GI-1	glioma cell line:GI-1	brain	glioblast	brain.cancer	cancer_matched_solid
cell lines	CNhs10742	astrocytoma cell line:TM-31	astrocytoma cell line:TM-31	brain	astrocyte	brain.cancer	cancer_matched_solid
cell lines	CNhs11185	glioblastoma cell line:A172	glioblastoma cell line:A172	brain	glioblast	brain.cancer	cancer_matched_solid
cell lines	CNhs11248	glioblastoma cell line:A172	glioblastoma cell line:A172	brain	glioblast	brain.cancer	cancer_matched_solid
cell lines	CNhs11272	glioblastoma cell line:T98G	glioblastoma cell line:T98G	brain	glioblast	brain.cancer	cancer_matched_solid
cell lines	CNhs11811	neuroblastoma cell line:NH-12	neuroblastoma cell line:NH-12	brain	neuroblast	brain.cancer	cancer_matched_solid
cell lines	CNhs11853	neuroepithelioma cell line:SK-N-MC	neuroepithelioma cell line:SK-N-MC	brain	unclassifiable	brain.cancer	cancer_matched_solid
cell lines	CNhs11861	medulloblastoma cell line:ONS-76	medulloblastoma cell line:ONS-76	brain	neurectodermal cell	brain.cancer	cancer_matched_solid
cell lines	CNhs11945	meningioma cell line:HKBMM	meningioma cell line:HKBMM	brain	meningeal cell	brain.cancer	cancer_matched_solid
cell lines	CNhs12805	medulloblastoma cell line:D283 Med	medulloblastoma cell line:D283 Med	brain	neurectodermal cell	brain.cancer	cancer_matched_solid
cell lines	CNhs10729	renal cell carcinoma cell line:OS-RC-2	renal cell carcinoma cell line:OS-RC-2	kidney	unclassifiable	kidney.cancer	cancer_matched_solid
cell lines	CNhs11257	renal cell carcinoma cell line:TUHR10TKB	renal cell carcinoma cell line:TUHR10TKB	kidney	unclassifiable	kidney.cancer	cancer_matched_solid
cell lines	CNhs11728	Wilms' tumor cell line:HFWT	Wilms' tumor cell line:HFWT	kidney	unclassifiable	kidney.cancer	cancer_matched_solid
cell lines	CNhs11744	neuroectodermal tumor cell line:FU-RPNT-1	neuroectodermal tumor cell line:FU-RPNT-1	kidney	unclassifiable	kidney.cancer	cancer_matched_solid
cell lines	CNhs11753	neuroectodermal tumor cell line:FU-RPNT-2	neuroectodermal tumor cell line:FU-RPNT-2	kidney	unclassifiable	kidney.cancer	cancer_matched_solid
cell lines	CNhs11848	leiomyoblastoma cell line:G-402	leiomyoblastoma cell line:G-402	kidney	unclassifiable	kidney.cancer	cancer_matched_solid
cell lines	CNhs11892	Wilms' tumor cell line:G-401	Wilms' tumor cell line:G-401	kidney	unclassifiable	kidney.cancer	cancer_matched_solid
cell lines	CNhs11271	hepatoma cell line:Li-7	hepatoma cell line:Li-7	liver	hepatocyte	liver.cancer	cancer_matched_solid
cell lines	CNhs11933	pleomorphic hepatocellular carcinoma cell line:SNU-387	pleomorphic hepatocellular carcinoma cell line:SNU-387	liver	hepatocyte	liver.cancer	cancer_matched_solid
cell lines	CNhs12328	hepatocellular carcinoma cell line: HepG2 ENCODE, biol_rep1	hepatocellular carcinoma cell line: HepG2 ENCODE replicate 1	liver	hepatocyte	liver.cancer	cancer_matched_solid
cell lines	CNhs12329	hepatocellular carcinoma cell line: HepG2 ENCODE, biol_rep2	hepatocellular carcinoma cell line: HepG2 ENCODE replicate 2	liver	hepatocyte	liver.cancer	cancer_matched_solid
cell lines	CNhs12330	hepatocellular carcinoma cell line: HepG2 ENCODE, biol_rep3	hepatocellular carcinoma cell line: HepG2 ENCODE replicate 3	liver	hepatocyte	liver.cancer	cancer_matched_solid
cell lines	CNhs10726	lung adenocarcinoma cell line:PC-14	lung adenocarcinoma cell line:PC-14	lung	unclassifiable	lung.cancer	cancer_matched_solid
cell lines	CNhs10751	giant cell carcinoma cell line:Lu99B	giant cell carcinoma cell line:Lu99B	lung	unclassifiable	lung.cancer	cancer_matched_solid
cell lines	CNhs11273	squamous cell lung carcinoma cell line:EBC-1	squamous cell lung carcinoma cell line:EBC-1	lung	unclassifiable	lung.cancer	cancer_matched_solid
cell lines	CNhs11274	giant cell carcinoma cell line:LU65	giant cell carcinoma cell line:LU65	lung	unclassifiable	lung.cancer	cancer_matched_solid
cell lines	CNhs11275	lung adenocarcinoma cell line:A549	lung adenocarcinoma cell line:A549	lung	pneumocyte	lung.cancer	cancer_matched_solid
cell lines	CNhs11277	large cell lung carcinoma cell line:IA-LM	large cell lung carcinoma cell line:IA-LM	lung	unclassifiable	lung.cancer	cancer_matched_solid
cell lines	CNhs11285	small cell lung carcinoma cell line:LK-2	small cell lung carcinoma cell line:LK-2	lung	unclassifiable	lung.cancer	cancer_matched_solid
cell lines	CNhs11812	small cell lung carcinoma cell line:WA-hT	small cell lung carcinoma cell line:WA-hT	lung	unclassifiable	lung.cancer	cancer_matched_solid
cell lines	CNhs11838	alveolar cell carcinoma cell line:SW 1573	alveolar cell carcinoma cell line:SW 1573	lung	pneumocyte	lung.cancer	cancer_matched_solid
cell lines	CNhs11840	bronchioalveolar carcinoma cell line:NCI-H358	bronchioalveolar carcinoma cell line:NCI-H358	lung	clara cell	lung.cancer	cancer_matched_solid
cell lines	CNhs11841	bronchogenic carcinoma cell line:ChaGo-K-1	bronchogenic carcinoma cell line:ChaGo-K-1	lung	unclassifiable	lung.cancer	cancer_matched_solid
cell lines	CNhs11842	fibrous histiocytoma cell line:GCT TIB-223	fibrous histiocytoma cell line:GCT TIB-223	lung	unclassifiable	lung.cancer	cancer_matched_solid
cell lines	CNhs11862	bronchial squamous cell carcinoma cell line:KNS-62	bronchial squamous cell carcinoma cell line:KNS-62	lung	unclassifiable	lung.cancer	cancer_matched_solid
cell lines	CNhs12806	large cell lung carcinoma cell line:NCI-H460	large cell lung carcinoma cell line:NCI-H460	lung	unclassifiable	lung.cancer	cancer_matched_solid
cell lines	CNhs12808	small cell lung carcinoma cell line:DMS 144	small cell lung carcinoma cell line:DMS 144	lung	unclassifiable	lung.cancer	cancer_matched_solid
cell lines	CNhs12809	small cell lung carcinoma cell line:NCI-H82	small cell lung carcinoma cell line:NCI-H82	lung	unclassifiable	lung.cancer	cancer_matched_solid
cell lines	CNhs11254	melanoma cell line:G-361	melanoma cell line:G-361	melanocyte	melanocyte	melanocyte.cancer	cancer_matched_solid
cell lines	CNhs11281	melanoma cell line:COLO 679	melanoma cell line:COLO 679	melanocyte	melanocyte	melanocyte.cancer	cancer_matched_solid
cell lines	CNhs11263	mesothelioma cell line:ACC-MESO-1	mesothelioma cell line:ACC-MESO-1	mesothelium	mesothelial cell	mesothelium.cancer	cancer_matched_solid
cell lines	CNhs11264	mesothelioma cell line:ACC-MESO-4	mesothelioma cell line:ACC-MESO-4	mesothelium	mesothelial cell	mesothelium.cancer	cancer_matched_solid
cell lines	CNhs13061	mesothelioma cell line:NCI-H28	mesothelioma cell line:NCI-H28	mesothelium	mesothelial cell	mesothelium.cancer	cancer_matched_solid
cell lines	CNhs13062	mesothelioma cell line:NCI-H226	mesothelioma cell line:NCI-H226	mesothelium	mesothelial cell	mesothelium.cancer	cancer_matched_solid
cell lines	CNhs13063	mesothelioma cell line:NCI-H2052	mesothelioma cell line:NCI-H2052	mesothelium	mesothelial cell	mesothelium.cancer	cancer_matched_solid
cell lines	CNhs13064	mesothelioma cell line:NCI-H2452	mesothelioma cell line:NCI-H2452	mesothelium	mesothelial cell	mesothelium.cancer	cancer_matched_solid
cell lines	CNhs13066	mesothelioma cell line:Mero-25	mesothelioma cell line:Mero-25	mesothelium	mesothelial cell	mesothelium.cancer	cancer_matched_solid
cell lines	CNhs13067	mesothelioma cell line:Mero-41	mesothelioma cell line:Mero-41	mesothelium	mesothelial cell	mesothelium.cancer	cancer_matched_solid
cell lines	CNhs13068	mesothelioma cell line:Mero-48a	mesothelioma cell line:Mero-48a	mesothelium	mesothelial cell	mesothelium.cancer	cancer_matched_solid
cell lines	CNhs13069	mesothelioma cell line:Mero-82	mesothelioma cell line:Mero-82	mesothelium	mesothelial cell	mesothelium.cancer	cancer_matched_solid
cell lines	CNhs13070	mesothelioma cell line:Mero-83	mesothelioma cell line:Mero-83	mesothelium	mesothelial cell	mesothelium.cancer	cancer_matched_solid
cell lines	CNhs13072	mesothelioma cell line:Mero-84	mesothelioma cell line:Mero-84	mesothelium	mesothelial cell	mesothelium.cancer	cancer_matched_solid
cell lines	CNhs13073	mesothelioma cell line:Mero-95	mesothelioma cell line:Mero-95	mesothelium	mesothelial cell	mesothelium.cancer	cancer_matched_solid
cell lines	CNhs13074	mesothelioma cell line:No36	mesothelioma cell line:No36	mesothelium	mesothelial cell	mesothelium.cancer	cancer_matched_solid
cell lines	CNhs13075	mesothelioma cell line:ONE58	mesothelioma cell line:ONE58	mesothelium	mesothelial cell	mesothelium.cancer	cancer_matched_solid
cell lines	CNhs14376	mesothelioma cell line:Mero-14	mesothelioma cell line:Mero-14	mesothelium	mesothelial cell	mesothelium.cancer	cancer_matched_solid
cell lines	CNhs10736	breast carcinoma cell line:MDA-MB-453	breast carcinoma cell line:MDA-MB-453	breast	unclassifiable	breast.cancer	cancer_matched_solid
cell lines	CNhs11844	acantholytic squamous carcinoma cell line:HCC1806	acantholytic squamous carcinoma cell line:HCC1806	breast	unclassifiable	breast.cancer	cancer_matched_solid
cell lines	CNhs11943	breast carcinoma cell line:MCF7	breast carcinoma cell line:MCF7	breast	unclassifiable	breast.cancer	cancer_matched_solid
cell lines	CNhs11243	prostate cancer cell line:PC-3	prostate cancer cell line:PC-3	prostate	unclassifiable	prostate.cancer	cancer_matched_solid
cell lines	CNhs11260	prostate cancer cell line:DU145	prostate cancer cell line:DU145	prostate	unclassifiable	prostate.cancer	cancer_matched_solid
cell lines	CNhs11740	granulosa cell tumor cell line:KGN	granulosa cell tumor cell line:KGN	ovary	granulosa cell	ovary.cancer	cancer_matched_solid
cell lines	CNhs11745	clear cell carcinoma cell line:JHOC-5	clear cell carcinoma cell line:JHOC-5	ovary	unclassifiable	ovary.cancer	cancer_matched_solid
cell lines	CNhs11746	serous adenocarcinoma cell line:JHOS-2	serous adenocarcinoma cell line:JHOS-2	ovary	unclassifiable	ovary.cancer	cancer_matched_solid
cell lines	CNhs11752	mucinous adenocarcinoma cell line:JHOM-1	mucinous adenocarcinoma cell line:JHOM-1	ovary	unclassifiable	ovary.cancer	cancer_matched_solid
cell lines	CNhs11827	serous cystadenocarcinoma cell line:HTOA	serous cystadenocarcinoma cell line:HTOA	ovary	unclassifiable	ovary.cancer	cancer_matched_solid
cell lines	CNhs11873	mucinous cystadenocarcinoma cell line:MCAS	mucinous cystadenocarcinoma cell line:MCAS	ovary	unclassifiable	ovary.cancer	cancer_matched_solid
cell lines	CNhs11890	teratocarcinoma cell line:PA-1	teratocarcinoma cell line:PA-1	ovary	unclassifiable	ovary.cancer	cancer_matched_solid
primary cells	CNhs11311	Osteoblast - differentiated, donor1	Osteoblast - differentiated donor1	bone	osteocyte	bone.normal	normal_matched_solid
primary cells	CNhs11385	Osteoblast, donor2	Osteoblast donor2	bone	osteoblast	bone.normal	normal_matched_solid
primary cells	CNhs11980	Osteoblast - differentiated, donor2	Osteoblast - differentiated donor2	bone	osteocyte	bone.normal	normal_matched_solid
primary cells	CNhs12035	Osteoblast - differentiated, donor3	Osteoblast - differentiated donor3	bone	osteocyte	bone.normal	normal_matched_solid
primary cells	CNhs12036	Osteoblast, donor3	Osteoblast donor3	bone	osteoblast	bone.normal	normal_matched_solid
primary cells	CNhs10864	Astrocyte - cerebral cortex, donor1	Astrocyte - cerebral cortex donor1	brain	astrocyte	brain.normal	normal_matched_solid
primary cells	CNhs11317	Pericytes, donor1	Pericytes donor1	brain	pericyte	brain.normal	normal_matched_solid
primary cells	CNhs11321	Astrocyte - cerebellum, donor1	Astrocyte - cerebellum donor1	brain	astrocyte	brain.normal	normal_matched_solid
primary cells	CNhs11960	Astrocyte - cerebral cortex, donor2	Astrocyte - cerebral cortex donor2	brain	astrocyte	brain.normal	normal_matched_solid
primary cells	CNhs12005	Astrocyte - cerebral cortex, donor3	Astrocyte - cerebral cortex donor3	brain	astrocyte	brain.normal	normal_matched_solid
primary cells	CNhs12079	Pericytes, donor2	Pericytes donor2	brain	pericyte	brain.normal	normal_matched_solid
primary cells	CNhs12081	Astrocyte - cerebellum, donor2	Astrocyte - cerebellum donor2	brain	astrocyte	brain.normal	normal_matched_solid
primary cells	CNhs12117	Astrocyte - cerebellum, donor3	Astrocyte - cerebellum donor3	brain	astrocyte	brain.normal	normal_matched_solid
primary cells	CNhs12338	Neurons, donor1	Neurons donor1	brain	neuron	brain.normal	normal_matched_solid
primary cells	CNhs12726	Neurons, donor2	Neurons donor2	brain	neuron	brain.normal	normal_matched_solid
primary cells	CNhs13815	Neurons, donor3	Neurons donor3	brain	neuron	brain.normal	normal_matched_solid
primary cells	CNhs11330	Renal Proximal Tubular Epithelial Cell, donor1	Renal Proximal Tubular Epithelial Cell donor1	kidney	epithelial cell of kidney, proximal tubule	kidney.normal	normal_matched_solid
primary cells	CNhs11331	Renal Cortical Epithelial Cells, donor1	Renal Cortical Epithelial Cells donor1	kidney	epithelial cell of kidney, renal cortex	kidney.normal	normal_matched_solid
primary cells	CNhs11332	Renal Epithelial Cells, donor1	Renal Epithelial Cells donor1	kidney	epithelial cell of kidney	kidney.normal	normal_matched_solid
primary cells	CNhs11333	Renal Mesangial Cells, donor1	Renal Mesangial Cells donor1	kidney	mesangial cell, intraglomerular	kidney.normal	normal_matched_solid
primary cells	CNhs12074	Renal Glomerular Endothelial Cells, donor1	Renal Glomerular Endothelial Cells donor1	kidney	endothelial cell	kidney.normal	normal_matched_solid
primary cells	CNhs12086	Renal Glomerular Endothelial Cells, donor2	Renal Glomerular Endothelial Cells donor2	kidney	endothelial cell	kidney.normal	normal_matched_solid
primary cells	CNhs12087	Renal Proximal Tubular Epithelial Cell, donor2	Renal Proximal Tubular Epithelial Cell donor2	kidney	epithelial cell of kidney, proximal tubule	kidney.normal	normal_matched_solid
primary cells	CNhs12088	Renal Epithelial Cells, donor2	Renal Epithelial Cells donor2	kidney	epithelial cell of kidney	kidney.normal	normal_matched_solid
primary cells	CNhs12120	Renal Proximal Tubular Epithelial Cell, donor3	Renal Proximal Tubular Epithelial Cell donor3	kidney	epithelial cell of kidney, proximal tubule	kidney.normal	normal_matched_solid
primary cells	CNhs12121	Renal Mesangial Cells, donor3	Renal Mesangial Cells donor3	kidney	mesangial cell, intraglomerular	kidney.normal	normal_matched_solid
primary cells	CNhs12624	Renal Glomerular Endothelial Cells, donor3	Renal Glomerular Endothelial Cells donor3	kidney	endothelial cell	kidney.normal	normal_matched_solid
primary cells	CNhs12728	Renal Cortical Epithelial Cells, donor2	Renal Cortical Epithelial Cells donor2	kidney	epithelial cell of kidney, renal cortex	kidney.normal	normal_matched_solid
primary cells	CNhs12732	Renal Epithelial Cells, donor3	Renal Epithelial Cells donor3	kidney	epithelial cell of kidney	kidney.normal	normal_matched_solid
primary cells	CNhs12340	Hepatocyte, donor1	Hepatocyte donor1	liver	hepatocyte	liver.normal	normal_matched_solid
primary cells	CNhs12349	Hepatocyte, donor2	Hepatocyte donor2	liver	hepatocyte	liver.normal	normal_matched_solid
primary cells	CNhs12626	Hepatocyte, donor3	Hepatocyte donor3	liver	hepatocyte	liver.normal	normal_matched_solid
primary cells	CNhs10884	Small Airway Epithelial Cells, donor1	Small Airway Epithelial Cells donor1	lung	pneumocyte	lung.normal	normal_matched_solid
primary cells	CNhs11325	Alveolar Epithelial Cells, donor1	Alveolar Epithelial Cells donor1	lung	epithelial cell of lung, small airway	lung.normal	normal_matched_solid
primary cells	CNhs11975	Small Airway Epithelial Cells, donor2	Small Airway Epithelial Cells donor2	lung	pneumocyte	lung.normal	normal_matched_solid
primary cells	CNhs12016	Small Airway Epithelial Cells, donor3	Small Airway Epithelial Cells donor3	lung	pneumocyte	lung.normal	normal_matched_solid
primary cells	CNhs12054	Bronchial Epithelial Cell, donor4	Bronchial Epithelial Cell donor4	lung	epithelial cell of lung, bronchial	lung.normal	normal_matched_solid
primary cells	CNhs12058	Bronchial Epithelial Cell, donor5	Bronchial Epithelial Cell donor5	lung	epithelial cell of lung, bronchial	lung.normal	normal_matched_solid
primary cells	CNhs12062	Bronchial Epithelial Cell, donor6	Bronchial Epithelial Cell donor6	lung	epithelial cell of lung, bronchial	lung.normal	normal_matched_solid
primary cells	CNhs12084	Alveolar Epithelial Cells, donor2	Alveolar Epithelial Cells donor2	lung	epithelial cell of lung, small airway	lung.normal	normal_matched_solid
primary cells	CNhs11303	Melanocyte - light, donor1	Melanocyte - light donor1	melanocyte	melanocyte	melanocyte.normal	normal_matched_solid
primary cells	CNhs11383	Melanocyte - light, donor2	Melanocyte - light donor2	melanocyte	melanocyte	melanocyte.normal	normal_matched_solid
primary cells	CNhs12033	Melanocyte - light, donor3	Melanocyte - light donor3	melanocyte	melanocyte	melanocyte.normal	normal_matched_solid
primary cells	CNhs12570	Melanocyte - dark, donor3	Melanocyte - dark donor3	melanocyte	melanocyte	melanocyte.normal	normal_matched_solid
primary cells	CNhs10850	Mesothelial Cells, donor1	Mesothelial Cells donor1	mesothelium	mesothelial cell	mesothelium.normal	normal_matched_solid
primary cells	CNhs12012	Mesothelial Cells, donor3	Mesothelial Cells donor3	mesothelium	mesothelial cell	mesothelium.normal	normal_matched_solid
primary cells	CNhs12197	Mesothelial Cells, donor2	Mesothelial Cells donor2	mesothelium	mesothelial cell	mesothelium.normal	normal_matched_solid
primary cells	CNhs11077	Mammary Epithelial Cell, donor1	Mammary Epithelial Cell donor1	breast	mammary gland epithelial cell	breast.normal	normal_matched_solid
primary cells	CNhs11382	Mammary Epithelial Cell, donor2	Mammary Epithelial Cell donor2	breast	mammary gland epithelial cell	breast.normal	normal_matched_solid
primary cells	CNhs12032	Mammary Epithelial Cell, donor3	Mammary Epithelial Cell donor3	breast	mammary gland epithelial cell	breast.normal	normal_matched_solid
primary cells	CNhs10882	Prostate Epithelial Cells (polarized), donor1	Prostate Epithelial Cells donor1	prostate	epithelial cell	prostate.normal	normal_matched_solid
primary cells	CNhs11972	Prostate Epithelial Cells, donor2	Prostate Epithelial Cells donor2	prostate	epithelial cell	prostate.normal	normal_matched_solid
primary cells	CNhs12014	Prostate Epithelial Cells, donor3	Prostate Epithelial Cells donor3	prostate	epithelial cell	prostate.normal	normal_matched_solid
primary cells	CNhs12372	mesenchymal precursor cell - ovarian cancer left ovary, donor1	mesenchymal precursor cell - ovarian cancer left ovary donor1	ovary	mesenchymal precursor cell	ovary.normal	normal_matched_solid
primary cells	CNhs12373	mesenchymal precursor cell - ovarian cancer right ovary, donor1	mesenchymal precursor cell - ovarian cancer right ovary donor1	ovary	mesenchymal precursor cell	ovary.normal	normal_matched_solid
primary cells	CNhs12374	mesenchymal precursor cell - ovarian cancer metastasis, donor1	mesenchymal precursor cell - ovarian cancer metastasis donor1	ovary	mesenchymal precursor cell	ovary.normal	normal_matched_solid
primary cells	CNhs12375	mesenchymal precursor cell - ovarian cancer right ovary, donor2	mesenchymal precursor cell - ovarian cancer right ovary donor2	ovary	mesenchymal precursor cell	ovary.normal	normal_matched_solid
primary cells	CNhs12376	mesenchymal precursor cell - ovarian cancer left ovary, donor3	mesenchymal precursor cell - ovarian cancer left ovary donor3	ovary	mesenchymal precursor cell	ovary.normal	normal_matched_solid
primary cells	CNhs12377	mesenchymal precursor cell - ovarian cancer right ovary, donor3 (SOC-57-02)	mesenchymal precursor cell - ovarian cancer right ovary donor3	ovary	mesenchymal precursor cell	ovary.normal	normal_matched_solid
primary cells	CNhs12378	mesenchymal precursor cell - ovarian cancer metastasis, donor3	mesenchymal precursor cell - ovarian cancer metastasis donor3	ovary	mesenchymal precursor cell	ovary.normal	normal_matched_solid
primary cells	CNhs13092	mesenchymal precursor cell - ovarian cancer left ovary, donor2	mesenchymal precursor cell - ovarian cancer left ovary donor2	ovary	mesenchymal precursor cell	ovary.normal	normal_matched_solid
primary cells	CNhs13093	mesenchymal precursor cell - ovarian cancer metastasis, donor2	mesenchymal precursor cell - ovarian cancer metastasis donor2	ovary	mesenchymal precursor cell	ovary.normal	normal_matched_solid
primary cells	CNhs13094	mesenchymal precursor cell - ovarian cancer left ovary, donor4	mesenchymal precursor cell - ovarian cancer left ovary donor4	ovary	mesenchymal precursor cell	ovary.normal	normal_matched_solid
primary cells	CNhs13096	mesenchymal precursor cell - ovarian cancer right ovary, donor4	mesenchymal precursor cell - ovarian cancer right ovary donor4	ovary	mesenchymal precursor cell	ovary.normal	normal_matched_solid
primary cells	CNhs13097	mesenchymal precursor cell - ovarian cancer metastasis, donor4	mesenchymal precursor cell - ovarian cancer metastasis donor4	ovary	mesenchymal precursor cell	ovary.normal	normal_matched_solid
cell lines	CNhs10738	adult T-cell leukemia cell line:ATN-1	adult T-cell leukemia cell line:ATN-1	lymphoid	t cell	lymphoid.cancer	cancer_matched_blood
cell lines	CNhs10739	Burkitt's lymphoma cell line:DAUDI	Burkitt's lymphoma cell line:DAUDI	lymphoid	b cell	lymphoid.cancer	cancer_matched_blood
cell lines	CNhs10741	splenic lymphoma with villous lymphocytes cell line:SLVL	splenic lymphoma with villous lymphocytes cell line:SLVL	lymphoid	b cell	lymphoid.cancer	cancer_matched_blood
cell lines	CNhs10746	acute lymphoblastic leukemia (T-ALL) cell line:HPB-ALL	acute lymphoblastic leukemia (T-ALL) cell line:HPB-ALL	lymphoid	t cell	lymphoid.cancer	cancer_matched_blood
cell lines	CNhs10747	non T non B acute lymphoblastic leukemia (ALL) cell line:P30/OHK	non T non B acute lymphoblastic leukemia (ALL) cell line:P30/OHK	lymphoid	lymphocyte	lymphoid.cancer	cancer_matched_blood
cell lines	CNhs11251	acute lymphoblastic leukemia (B-ALL) cell line:BALL-1	acute lymphoblastic leukemia (B-ALL) cell line:BALL-1	lymphoid	b cell	lymphoid.cancer	cancer_matched_blood
cell lines	CNhs11253	acute lymphoblastic leukemia (T-ALL) cell line:Jurkat	acute lymphoblastic leukemia (T-ALL) cell line:Jurkat	lymphoid	t cell	lymphoid.cancer	cancer_matched_blood
cell lines	CNhs11258	myeloma cell line:PCM6	myeloma cell line:PCM6	lymphoid	b cell	lymphoid.cancer	cancer_matched_blood
cell lines	CNhs11268	Burkitt's lymphoma cell line:RAJI	Burkitt's lymphoma cell line:RAJI	lymphoid	b cell	lymphoid.cancer	cancer_matched_blood
cell lines	CNhs11282	acute lymphoblastic leukemia (B-ALL) cell line:NALM-6	acute lymphoblastic leukemia (B-ALL) cell line:NALM-6	lymphoid	b cell	lymphoid.cancer	cancer_matched_blood
cell lines	CNhs11714	chronic lymphocytic leukemia (T-CLL) cell line:SKW-3	chronic lymphocytic leukemia (T-CLL) cell line:SKW-3	lymphoid	t cell	lymphoid.cancer	cancer_matched_blood
cell lines	CNhs11715	Hodgkin's lymphoma cell line:HD-Mar2	Hodgkin's lymphoma cell line:HD-Mar2	lymphoid	lymphocyte	lymphoid.cancer	cancer_matched_blood
cell lines	CNhs11741	diffuse large B-cell lymphoma cell line:CTB-1	diffuse large B-cell lymphoma cell line:CTB-1	lymphoid	b cell	lymphoid.cancer	cancer_matched_blood
cell lines	CNhs11843	hairy cell leukemia cell line:Mo	hairy cell leukemia cell line:Mo	lymphoid	t cell	lymphoid.cancer	cancer_matched_blood
cell lines	CNhs11852	lymphangiectasia cell line:DS-1	lymphangiectasia cell line:DS-1	lymphoid	b cell	lymphoid.cancer	cancer_matched_blood
cell lines	CNhs11858	mycosis fungoides, T cell lymphoma cell line:HuT 102 TIB-162	mycosis fungoides, T cell lymphoma cell line:HuT 102 TIB-162	lymphoid	t cell	lymphoid.cancer	cancer_matched_blood
cell lines	CNhs11867	NK T cell leukemia cell line:KHYG-1	NK T cell leukemia cell line:KHYG-1	lymphoid	t cell	lymphoid.cancer	cancer_matched_blood
cell lines	CNhs11881	anaplastic large cell lymphoma cell line:Ki-JK	anaplastic large cell lymphoma cell line:Ki-JK	lymphoid	lymphoid cell	lymphoid.cancer	cancer_matched_blood
cell lines	CNhs11935	lymphoma, malignant, hairy B-cell cell line:MLMA	lymphoma, malignant, hairy B-cell cell line:MLMA	lymphoid	b cell	lymphoid.cancer	cancer_matched_blood
cell lines	CNhs12331	B lymphoblastoid cell line: GM12878 ENCODE, biol_rep1	B lymphoblastoid cell line: GM12878 ENCODE replicate 1	lymphoid	b cell	lymphoid.cancer	cancer_matched_blood
cell lines	CNhs12332	B lymphoblastoid cell line: GM12878 ENCODE, biol_rep2	B lymphoblastoid cell line: GM12878 ENCODE replicate 2	lymphoid	b cell	lymphoid.cancer	cancer_matched_blood
cell lines	CNhs12333	B lymphoblastoid cell line: GM12878 ENCODE, biol_rep3	B lymphoblastoid cell line: GM12878 ENCODE replicate 3	lymphoid	b cell	lymphoid.cancer	cancer_matched_blood
cell lines	CNhs12807	plasma cell leukemia cell line:ARH-77	plasma cell leukemia cell line:ARH-77	lymphoid	plasma cell	lymphoid.cancer	cancer_matched_blood
cell lines	CNhs10722	acute myeloid leukemia (FAB M5) cell line:THP-1 (fresh)	acute myeloid leukemia (FAB M5) cell line:THP-1 Fresh-3	myeloid	monoblast	myeloid.cancer	cancer_matched_blood
cell lines	CNhs10723	acute myeloid leukemia (FAB M5) cell line:THP-1 (revived)	acute myeloid leukemia (FAB M5) cell line:THP-1 Revived-1	myeloid	monoblast	myeloid.cancer	cancer_matched_blood
cell lines	CNhs10724	acute myeloid leukemia (FAB M5) cell line:THP-1 (thawed)	acute myeloid leukemia (FAB M5) cell line:THP-1 Thawed-3	myeloid	monoblast	myeloid.cancer	cancer_matched_blood
cell lines	CNhs10727	chronic myelogenous leukemia cell line:KU812	chronic myelogenous leukemia cell line:KU812	myeloid	basophil progenitor cell	myeloid.cancer	cancer_matched_blood
cell lines	CNhs11250	chronic myelogenous leukemia cell line:K562	chronic myelogenous leukemia cell line:K562	myeloid	granulocyte	myeloid.cancer	cancer_matched_blood
cell lines	CNhs11845	biphenotypic B myelomonocytic leukemia cell line:MV-4-11	biphenotypic B myelomonocytic leukemia cell line:MV-4-11	myeloid	myeloid progenitor cell	myeloid.cancer	cancer_matched_blood
cell lines	CNhs11864	acute myeloid leukemia (FAB M2) cell line:NKM-1	acute myeloid leukemia (FAB M2) cell line:NKM-1	myeloid	myeloid progenitor cell	myeloid.cancer	cancer_matched_blood
cell lines	CNhs11865	chronic myelogenous leukemia (CML) cell line:MEG-A2	chronic myelogenous leukemia (CML) cell line:MEG-A2	myeloid	myeloid progenitor cell	myeloid.cancer	cancer_matched_blood
cell lines	CNhs11886	chronic myeloblastic leukemia (CML) cell line:KCL-22	chronic myeloblastic leukemia (CML) cell line:KCL-22	myeloid	granulocyte monocyte progenitor cell	myeloid.cancer	cancer_matched_blood
cell lines	CNhs11888	acute myeloid leukemia (FAB M7) cell line:MKPL-1	acute myeloid leukemia (FAB M7) cell line:MKPL-1	myeloid	myeloid progenitor cell	myeloid.cancer	cancer_matched_blood
cell lines	CNhs11934	myelodysplastic syndrome cell line:SKM-1	myelodysplastic syndrome cell line:SKM-1	myeloid	myeloid cell	myeloid.cancer	cancer_matched_blood
cell lines	CNhs12334	chronic myelogenous leukemia cell line:K562 ENCODE, biol_rep1	chronic myelogenous leukemia cell line:K562 ENCODE replicate 1	myeloid	granulocyte	myeloid.cancer	cancer_matched_blood
cell lines	CNhs12335	chronic myelogenous leukemia cell line:K562 ENCODE, biol_rep2	chronic myelogenous leukemia cell line:K562 ENCODE replicate 2	myeloid	granulocyte	myeloid.cancer	cancer_matched_blood
cell lines	CNhs12336	chronic myelogenous leukemia cell line:K562 ENCODE, biol_rep3	chronic myelogenous leukemia cell line:K562 ENCODE replicate 3	myeloid	granulocyte	myeloid.cancer	cancer_matched_blood
cell lines	CNhs13049	acute myeloid leukemia (FAB M7) cell line:M-MOK	acute myeloid leukemia (FAB M7) cell line:M-MOK	myeloid	megakaryoblast	myeloid.cancer	cancer_matched_blood
cell lines	CNhs13050	acute myeloid leukemia (FAB M5) cell line:NOMO-1	acute myeloid leukemia (FAB M5) cell line:NOMO-1	myeloid	myeloid progenitor cell	myeloid.cancer	cancer_matched_blood
cell lines	CNhs13051	acute myeloid leukemia (FAB M5) cell line:P31/FUJ	acute myeloid leukemia (FAB M5) cell line:P31/FUJ	myeloid	myeloid progenitor cell	myeloid.cancer	cancer_matched_blood
cell lines	CNhs13052	acute myeloid leukemia (FAB M2) cell line:Kasumi-6	acute myeloid leukemia (FAB M2) cell line:Kasumi-6	myeloid	myeloid progenitor cell	myeloid.cancer	cancer_matched_blood
cell lines	CNhs13053	acute myeloid leukemia (FAB M0) cell line:KG-1	acute myeloid leukemia (FAB M0) cell line:KG-1	myeloid	myeloid progenitor cell	myeloid.cancer	cancer_matched_blood
cell lines	CNhs13054	acute myeloid leukemia (FAB M1) cell line:HYT-1	acute myeloid leukemia (FAB M1) cell line:HYT-1	myeloid	myeloid progenitor cell	myeloid.cancer	cancer_matched_blood
cell lines	CNhs13055	acute myeloid leukemia (FAB M3) cell line:HL60	acute myeloid leukemia (FAB M3) cell line:HL60	myeloid	myeloid progenitor cell	myeloid.cancer	cancer_matched_blood
cell lines	CNhs13056	acute myeloid leukemia (FAB M4eo) cell line:EoL-1	acute myeloid leukemia (FAB M4eo) cell line:EoL-1	myeloid	eosinophil progenitor cell	myeloid.cancer	cancer_matched_blood
cell lines	CNhs13057	acute myeloid leukemia (FAB M4eo) cell line:EoL-3	acute myeloid leukemia (FAB M4eo) cell line:EoL-3	myeloid	eosinophil progenitor cell	myeloid.cancer	cancer_matched_blood
cell lines	CNhs13058	acute myeloid leukemia (FAB M5) cell line:U-937 DE-4	acute myeloid leukemia (FAB M5) cell line:U-937 DE-4	myeloid	monoblast	myeloid.cancer	cancer_matched_blood
cell lines	CNhs13241	acute myeloid leukemia (FAB M0) cell line:Kasumi-3	acute myeloid leukemia (FAB M0) cell line:Kasumi-3	myeloid	myeloid progenitor cell	myeloid.cancer	cancer_matched_blood
cell lines	CNhs13502	acute myeloid leukemia (FAB M2) cell line:Kasumi-1	acute myeloid leukemia (FAB M2) cell line:Kasumi-1	myeloid	myeloid progenitor cell	myeloid.cancer	cancer_matched_blood
cell lines	CNhs13503	acute myeloid leukemia (FAB M4) cell line:FKH-1	acute myeloid leukemia (FAB M4) cell line:FKH-1	myeloid	myeloid progenitor cell	myeloid.cancer	cancer_matched_blood
cell lines	CNhs13504	acute myeloid leukemia (FAB M4) cell line:HNT-34	acute myeloid leukemia (FAB M4) cell line:HNT-34	myeloid	myeloid progenitor cell	myeloid.cancer	cancer_matched_blood
primary cells	CNhs10853	CD4+ T Cells, donor1	CD4+ T Cells donor1	lymphoid	t cell, CD4+	lymphoid.normal	normal_matched_blood
primary cells	CNhs10854	CD8+ T Cells, donor1	CD8+ T Cells donor1	lymphoid	t cell, CD8+	lymphoid.normal	normal_matched_blood
primary cells	CNhs10857	Dendritic Cells - plasmacytoid, donor1	Dendritic Cells - plasmacytoid donor1	lymphoid	dendritic cell, plasmacytoid	lymphoid.normal	normal_matched_blood
primary cells	CNhs11955	CD4+ T Cells, donor2	CD4+ T Cells donor2	lymphoid	t cell, CD4+	lymphoid.normal	normal_matched_blood
primary cells	CNhs11956	CD8+ T Cells, donor2	CD8+ T Cells donor2	lymphoid	t cell, CD8+	lymphoid.normal	normal_matched_blood
primary cells	CNhs11998	CD4+ T Cells, donor3	CD4+ T Cells donor3	lymphoid	t cell, CD4+	lymphoid.normal	normal_matched_blood
primary cells	CNhs11999	CD8+ T Cells, donor3	CD8+ T Cells donor3	lymphoid	t cell, CD8+	lymphoid.normal	normal_matched_blood
primary cells	CNhs12175	CD19+ B Cells (pluriselect), donor090325, donation2	CD19+ B Cells (pluriselect) - donor1, rep2	lymphoid	b cell	lymphoid.normal	normal_matched_blood
primary cells	CNhs12176	CD8+ T Cells (pluriselect), donor090309, donation1	CD8+ T Cells (pluriselect) - donor 090309, donation1	lymphoid	T cell, CD8+	lymphoid.normal	normal_matched_blood
primary cells	CNhs12177	CD19+ B Cells (pluriselect), donor090309, donation1	CD19+ B Cells (pluriselect) - donor 090309, donation1	lymphoid	b cell	lymphoid.normal	normal_matched_blood
primary cells	CNhs12178	CD8+ T Cells (pluriselect), donor090309, donation2	CD8+ T Cells (pluriselect) - donor 090309, donation2	lymphoid	T cell, CD8+	lymphoid.normal	normal_matched_blood
primary cells	CNhs12179	CD19+ B Cells (pluriselect), donor090309, donation2	CD19+ B Cells (pluriselect) - donor 090309, donation2	lymphoid	b cell	lymphoid.normal	normal_matched_blood
primary cells	CNhs12180	CD8+ T Cells (pluriselect), donor090309, donation3	CD8+ T Cells (pluriselect) - donor 090309, donation3	lymphoid	T cell, CD8+	lymphoid.normal	normal_matched_blood
primary cells	CNhs12181	CD19+ B Cells (pluriselect), donor090309, donation3	CD19+ B Cells (pluriselect) - donor 090309, donation3	lymphoid	b cell	lymphoid.normal	normal_matched_blood
primary cells	CNhs12182	CD8+ T Cells (pluriselect), donor090612, donation1	CD8+ T Cells (pluriselect) - donor 090612, donation1	lymphoid	T cell, CD8+	lymphoid.normal	normal_matched_blood
primary cells	CNhs12183	CD19+ B Cells (pluriselect), donor090612, donation1	CD19+ B Cells (pluriselect) - donor 090612, donation1	lymphoid	b cell	lymphoid.normal	normal_matched_blood
primary cells	CNhs12184	CD8+ T Cells (pluriselect), donor090612, donation2	CD8+ T Cells (pluriselect) - donor 090612, donation2	lymphoid	T cell, CD8+	lymphoid.normal	normal_matched_blood
primary cells	CNhs12185	CD19+ B Cells (pluriselect), donor090612, donation2	CD19+ B Cells (pluriselect) - donor 090612, donation2	lymphoid	b cell	lymphoid.normal	normal_matched_blood
primary cells	CNhs12187	CD8+ T Cells (pluriselect), donor090612, donation3	CD8+ T Cells (pluriselect) - donor 090612, donation3	lymphoid	T cell, CD8+	lymphoid.normal	normal_matched_blood
primary cells	CNhs12188	CD19+ B Cells (pluriselect), donor090612, donation3	CD19+ B Cells (pluriselect) - donor 090612, donation3	lymphoid	b cell	lymphoid.normal	normal_matched_blood
primary cells	CNhs12196	Dendritic Cells - plasmacytoid, donor2	Dendritic Cells - plasmacytoid donor2	lymphoid	dendritic cell, plasmacytoid	lymphoid.normal	normal_matched_blood
primary cells	CNhs12199	CD8+ T Cells (pluriselect), donor090325, donation2	CD8+ T Cells (pluriselect) - donor1, rep2	lymphoid	T cell, CD8+	lymphoid.normal	normal_matched_blood
primary cells	CNhs12200	Dendritic Cells - plasmacytoid, donor3	Dendritic Cells - plasmacytoid donor3	lymphoid	dendritic cell, plasmacytoid	lymphoid.normal	normal_matched_blood
primary cells	CNhs12201	CD8+ T Cells (pluriselect), donor090325, donation1	CD8+ T Cells (pluriselect) - donor1, rep1	lymphoid	T cell, CD8+	lymphoid.normal	normal_matched_blood
primary cells	CNhs12343	CD19+ B Cells, donor1	CD19+ B Cells donor1	lymphoid	b cell	lymphoid.normal	normal_matched_blood
primary cells	CNhs12352	CD19+ B Cells, donor2	CD19+ B Cells donor2	lymphoid	b cell	lymphoid.normal	normal_matched_blood
primary cells	CNhs12354	CD19+ B Cells, donor3	CD19+ B Cells donor3	lymphoid	b cell	lymphoid.normal	normal_matched_blood
primary cells	CNhs12531	CD19+ B Cells (pluriselect), donor090325, donation1	CD19+ B Cells (pluriselect) - donor1, rep1	lymphoid	b cell	lymphoid.normal	normal_matched_blood
primary cells	CNhs13195	CD4+CD25+CD45RA- memory regulatory T cells, donor1	CD4+CD25+CD45RA- naive regulatory T cells donor1	lymphoid	t cell	lymphoid.normal	normal_matched_blood
primary cells	CNhs13202	CD4+CD25-CD45RA+ naive conventional T cells expanded, donor1	CD4+CD25-CD45RA+ memory conventional T cells expanded donor1	lymphoid	t cell	lymphoid.normal	normal_matched_blood
primary cells	CNhs13203	CD4+CD25+CD45RA+ naive regulatory T cells expanded, donor1	CD4+CD25+CD45RA+ memory regulatory T cells expanded donor1	lymphoid	t cell	lymphoid.normal	normal_matched_blood
primary cells	CNhs13204	CD4+CD25+CD45RA- memory regulatory T cells expanded, donor1	CD4+CD25+CD45RA- naive regulatory T cells expanded donor1	lymphoid	t cell	lymphoid.normal	normal_matched_blood
primary cells	CNhs13205	CD4+CD25-CD45RA+ naive conventional T cells, donor2	CD4+CD25-CD45RA+ memory conventional T cells donor2	lymphoid	t cell	lymphoid.normal	normal_matched_blood
primary cells	CNhs13206	CD4+CD25+CD45RA- memory regulatory T cells, donor2	CD4+CD25+CD45RA- naive regulatory T cells donor2	lymphoid	t cell	lymphoid.normal	normal_matched_blood
primary cells	CNhs13215	CD4+CD25-CD45RA- memory conventional T cells expanded, donor1	CD4+CD25-CD45RA- naive conventional T cells expanded donor1	lymphoid	t cell	lymphoid.normal	normal_matched_blood
primary cells	CNhs13223	CD4+CD25-CD45RA+ naive conventional T cells, donor1	CD4+CD25-CD45RA+ memory conventional T cells donor1	lymphoid	t cell	lymphoid.normal	normal_matched_blood
primary cells	CNhs13235	CD4+CD25+CD45RA+ naive regulatory T cells, donor2	CD4+CD25+CD45RA+ memory regulatory T cells donor2	lymphoid	t cell	lymphoid.normal	normal_matched_blood
primary cells	CNhs13237	CD4+CD25-CD45RA- memory conventional T cells, donor2	CD4+CD25-CD45RA- naive conventional T cells donor2	lymphoid	t cell	lymphoid.normal	normal_matched_blood
primary cells	CNhs13238	CD4+CD25+CD45RA+ naive regulatory T cells, donor1	CD4+CD25+CD45RA+ memory regulatory T cells donor1	lymphoid	t cell	lymphoid.normal	normal_matched_blood
primary cells	CNhs13239	CD4+CD25-CD45RA- memory conventional T cells, donor1	CD4+CD25-CD45RA- naive conventional T cells donor1	lymphoid	t cell	lymphoid.normal	normal_matched_blood
primary cells	CNhs13512	CD4+CD25-CD45RA+ naive conventional T cells, donor3	CD4+CD25-CD45RA+ memory conventional T cells donor3	lymphoid	t cell	lymphoid.normal	normal_matched_blood
primary cells	CNhs13513	CD4+CD25+CD45RA+ naive regulatory T cells, donor3	CD4+CD25+CD45RA+ memory regulatory T cells donor3	lymphoid	t cell	lymphoid.normal	normal_matched_blood
primary cells	CNhs13538	CD4+CD25+CD45RA- memory regulatory T cells, donor3	CD4+CD25+CD45RA- naive regulatory T cells donor3	lymphoid	t cell	lymphoid.normal	normal_matched_blood
primary cells	CNhs13539	CD4+CD25-CD45RA- memory conventional T cells, donor3	CD4+CD25-CD45RA- naive conventional T cells donor3	lymphoid	t cell	lymphoid.normal	normal_matched_blood
primary cells	CNhs13811	CD4+CD25+CD45RA- memory regulatory T cells expanded, donor2	CD4+CD25+CD45RA- naive regulatory T cells expanded donor2	lymphoid	t cell	lymphoid.normal	normal_matched_blood
primary cells	CNhs13812	CD4+CD25+CD45RA- memory regulatory T cells expanded, donor3	CD4+CD25+CD45RA- naive regulatory T cells expanded donor3	lymphoid	t cell	lymphoid.normal	normal_matched_blood
primary cells	CNhs13813	CD4+CD25-CD45RA+ naive conventional T cells expanded, donor2	CD4+CD25-CD45RA+ memory conventional T cells expanded donor2	lymphoid	t cell	lymphoid.normal	normal_matched_blood
primary cells	CNhs13814	CD4+CD25-CD45RA+ naive conventional T cells expanded, donor3	CD4+CD25-CD45RA+ memory conventional T cells expanded donor3	lymphoid	t cell	lymphoid.normal	normal_matched_blood
primary cells	CNhs10852	CD14+ Monocytes, donor1	CD14+ Monocytes donor1	myeloid	monocyte	myeloid.normal	normal_matched_blood
primary cells	CNhs10855	Dendritic Cells - monocyte immature derived, donor1	Dendritic Cells - monocyte immature derived donor1	myeloid	dendritic cell, myeloid, immature	myeloid.normal	normal_matched_blood
primary cells	CNhs10861	Macrophage - monocyte derived, donor1	Macrophage - monocyte derived donor1	myeloid	macrophage	myeloid.normal	normal_matched_blood
primary cells	CNhs10862	Neutrophils, donor1	Neutrophils donor1	myeloid	neutrophil	myeloid.normal	normal_matched_blood
primary cells	CNhs11062	Dendritic Cells - monocyte immature derived, donor1	Dendritic Cells - monocyte immature derived donor1	myeloid	dendritic cell, myeloid, immature	myeloid.normal	normal_matched_blood
primary cells	CNhs11899	Macrophage - monocyte derived, donor2	Macrophage - monocyte derived donor2	myeloid	macrophage	myeloid.normal	normal_matched_blood
primary cells	CNhs11905	Neutrophils, donor3	Neutrophils donor3	myeloid	neutrophil	myeloid.normal	normal_matched_blood
primary cells	CNhs11954	CD14+ Monocytes, donor2	CD14+ Monocytes donor2	myeloid	monocyte	myeloid.normal	normal_matched_blood
primary cells	CNhs11959	Neutrophils, donor2	Neutrophils donor2	myeloid	neutrophil	myeloid.normal	normal_matched_blood
primary cells	CNhs11997	CD14+ Monocytes, donor3	CD14+ Monocytes donor3	myeloid	monocyte	myeloid.normal	normal_matched_blood
primary cells	CNhs12000	Dendritic Cells - monocyte immature derived, donor3	Dendritic Cells - monocyte immature derived donor3	myeloid	dendritic cell, myeloid, immature	myeloid.normal	normal_matched_blood
primary cells	CNhs12003	Macrophage - monocyte derived, donor3	Macrophage - monocyte derived donor3	myeloid	macrophage	myeloid.normal	normal_matched_blood
primary cells	CNhs12546	Basophils, donor1	Basophils donor1 heparinase treated	myeloid	basophil	myeloid.normal	normal_matched_blood
primary cells	CNhs12548	Eosinophils, donor2	Eosinophils donor2 heparinase treated	myeloid	eosinophil	myeloid.normal	normal_matched_blood
primary cells	CNhs12549	Eosinophils, donor3	Eosinophils donor3 heparinase treated	myeloid	eosinophil	myeloid.normal	normal_matched_blood
primary cells	CNhs12563	Basophils, donor2	Basophils donor2 heparinase treated	myeloid	basophil	myeloid.normal	normal_matched_blood
primary cells	CNhs12575	Basophils, donor3	Basophils donor3 heparinase treated	myeloid	basophil	myeloid.normal	normal_matched_blood
primary cells	CNhs13207	CD14-CD16+ Monocytes, donor2	CD14-CD16+ Monocytes donor2	myeloid	monocyte	myeloid.normal	normal_matched_blood
primary cells	CNhs13208	CD14+CD16+ Monocytes, donor2	CD14+CD16+ Monocytes donor2	myeloid	monocyte	myeloid.normal	normal_matched_blood
primary cells	CNhs13216	CD14+CD16- Monocytes, donor2	CD14+CD16- Monocytes donor2	myeloid	monocyte	myeloid.normal	normal_matched_blood
primary cells	CNhs13224	CD14+CD16- Monocytes, donor1	CD14+CD16- Monocytes donor1	myeloid	monocyte	myeloid.normal	normal_matched_blood
primary cells	CNhs13229	CD14-CD16+ Monocytes, donor1	CD14-CD16+ Monocytes donor1	myeloid	monocyte	myeloid.normal	normal_matched_blood
primary cells	CNhs13540	CD14+CD16- Monocytes, donor3	CD14+CD16- Monocytes donor3	myeloid	monocyte	myeloid.normal	normal_matched_blood
primary cells	CNhs13541	CD14+CD16+ Monocytes, donor1	CD14+CD16+ Monocytes donor1	myeloid	monocyte	myeloid.normal	normal_matched_blood
primary cells	CNhs13548	CD14-CD16+ Monocytes, donor3	CD14-CD16+ Monocytes donor3	myeloid	monocyte	myeloid.normal	normal_matched_blood
primary cells	CNhs13549	CD14+CD16+ Monocytes, donor3	CD14+CD16+ Monocytes donor3	myeloid	monocyte	myeloid.normal	normal_matched_blood
cell lines	CNhs11726	testicular germ cell embryonal carcinoma cell line:NEC8	testicular germ cell embryonal carcinoma cell line:NEC8	testis	unclassifiable	testis.cancer	cancer_unmatched_solid
cell lines	CNhs11876	testicular germ cell embryonal carcinoma cell line:ITO-II	testicular germ cell embryonal carcinoma cell line:ITO-II	testis	unclassifiable	testis.cancer	cancer_unmatched_solid
cell lines	CNhs12351	testicular germ cell embryonal carcinoma cell line:NEC14	testicular germ cell embryonal carcinoma cell line:NEC14	testis	unclassifiable	testis.cancer	cancer_unmatched_solid
cell lines	CNhs12362	testicular germ cell embryonal carcinoma cell line:NEC15	testicular germ cell embryonal carcinoma cell line:NEC15	testis	unclassifiable	testis.cancer	cancer_unmatched_solid
cell lines	CNhs10733	gall bladder carcinoma cell line:TGBC2TKB	gall bladder carcinoma cell line:TGBC2TKB		gall bladder	3_carcinoma	cancer_unmatched_solid
cell lines	CNhs10735	transitional-cell carcinoma cell line:5637	transitional-cell carcinoma cell line:5637	68 year old adult	bladder	3_carcinoma	cancer_unmatched_solid
cell lines	CNhs10737	colon carcinoma cell line:COLO-320	colon carcinoma cell line:COLO-320	55 year old adult	colon	3_carcinoma	cancer_unmatched_solid
cell lines	CNhs10740	choriocarcinoma cell line:BeWo	choriocarcinoma cell line:BeWo	placenta	trophoblast cell	3_carcinoma	cancer_unmatched_solid
cell lines	CNhs10743	epidermoid carcinoma cell line:A431	epidermoid carcinoma cell line:A431	85 year old adult	vulva	3_carcinoma	cancer_unmatched_solid
cell lines	CNhs10745	anaplastic carcinoma cell line:8305C	anaplastic carcinoma cell line:8305C		thyroid	3_carcinoma	cancer_unmatched_solid
cell lines	CNhs10748	epidermoid carcinoma cell line:Ca Ski	epidermoid carcinoma cell line:Ca Ski	40 year old adult	cervix	3_carcinoma	cancer_unmatched_solid
cell lines	CNhs10750	bile duct carcinoma cell line:HuCCT1	bile duct carcinoma cell line:HuCCT1	56 year old adult	bile duct	3_carcinoma	cancer_unmatched_solid
cell lines	CNhs10752	oral squamous cell carcinoma cell line:Ca9-22	oral squamous cell carcinoma cell line:Ca9-22		gum	3_carcinoma	cancer_unmatched_solid
cell lines	CNhs10753	signet ring carcinoma cell line:Kato III	signet ring carcinoma cell line:Kato III		stomach	3_carcinoma	cancer_unmatched_solid
cell lines	CNhs11100	ductal cell carcinoma cell line:KLM-1	ductal cell carcinoma cell line:KLM-1		pancreas	3_carcinoma	cancer_unmatched_solid
cell lines	CNhs11252	squamous cell carcinoma cell line:EC-GI-10	squamous cell carcinoma cell line:EC-GI-10		esophagus	3_carcinoma	cancer_unmatched_solid
cell lines	CNhs11256	gall bladder carcinoma cell line:TGBC14TKB	gall bladder carcinoma cell line:TGBC14TKB		gall bladder	3_carcinoma	cancer_unmatched_solid
cell lines	CNhs11259	ductal cell carcinoma cell line:MIA Paca2	ductal cell carcinoma cell line:MIA Paca2		pancreas	3_carcinoma	cancer_unmatched_solid
cell lines	CNhs11261	transitional-cell carcinoma cell line:JMSU1	transitional-cell carcinoma cell line:JMSU1		bladder	3_carcinoma	cancer_unmatched_solid
cell lines	CNhs11265	bile duct carcinoma cell line:TFK-1	bile duct carcinoma cell line:TFK-1		bile duct	3_carcinoma	cancer_unmatched_solid
cell lines	CNhs11266	endometrial carcinoma cell line:OMC-2	endometrial carcinoma cell line:OMC-2		endometrium	3_carcinoma	cancer_unmatched_solid
cell lines	CNhs11270	signet ring carcinoma cell line:NUGC-4	signet ring carcinoma cell line:NUGC-4		stomach	3_carcinoma	cancer_unmatched_solid
cell lines	CNhs11280	colon carcinoma cell line:CACO-2	colon carcinoma cell line:CACO-2		colon	3_carcinoma	cancer_unmatched_solid
cell lines	CNhs11283	cholangiocellular carcinoma cell line:HuH-28	cholangiocellular carcinoma cell line:HuH-28		liver	3_carcinoma	cancer_unmatched_solid
cell lines	CNhs11287	oral squamous cell carcinoma cell line:HO-1-u-1	oral squamous cell carcinoma cell line:HO-1-u-1		gum	3_carcinoma	cancer_unmatched_solid
cell lines	CNhs11717	oral squamous cell carcinoma cell line:HSC-3	oral squamous cell carcinoma cell line:HSC-3		tongue	3_carcinoma	cancer_unmatched_solid
cell lines	CNhs11725	argyrophil small cell carcinoma cell line:TC-YIK	argyrophil small cell carcinoma cell line:TC-YIK		cervix	3_carcinoma	cancer_unmatched_solid
cell lines	CNhs11734	small-cell gastrointestinal carcinoma cell line:ECC4	small-cell gastrointestinal carcinoma cell line:ECC4		intestine	3_carcinoma	cancer_unmatched_solid
cell lines	CNhs11736	small cell gastrointestinal carcinoma cell line:ECC10	small cell gastrointestinal carcinoma cell line:ECC10		stomach	3_carcinoma	cancer_unmatched_solid
cell lines	CNhs11738	gastrointestinal carcinoma cell line:ECC12	gastrointestinal carcinoma cell line:ECC12		stomach	3_carcinoma	cancer_unmatched_solid
cell lines	CNhs11739	squamous cell carcinoma cell line:T3M-5	squamous cell carcinoma cell line:T3M-5		thyroid	3_carcinoma	cancer_unmatched_solid
cell lines	CNhs11810	oral squamous cell carcinoma cell line:SAS	oral squamous cell carcinoma cell line:SAS		tongue	3_carcinoma	cancer_unmatched_solid
cell lines	CNhs11820	choriocarcinoma cell line:T3M-3	choriocarcinoma cell line:T3M-3		chorioamniotic membrane	3_carcinoma	cancer_unmatched_solid
cell lines	CNhs11824	glassy cell carcinoma cell line:HOKUG	glassy cell carcinoma cell line:HOKUG		cervix	3_carcinoma	cancer_unmatched_solid
cell lines	CNhs11825	large cell non-keratinizing squamous carcinoma cell line:SKG-II-SF	large cell non-keratinizing squamous carcinoma cell line:SKG-II-SF		cervix	3_carcinoma	cancer_unmatched_solid
cell lines	CNhs11832	pancreatic carcinoma cell line:NOR-P1	pancreatic carcinoma cell line:NOR-P1		pancreas	3_carcinoma	cancer_unmatched_solid
cell lines	CNhs11849	pharyngeal carcinoma cell line:Detroit 562	pharyngeal carcinoma cell line:Detroit 562		pharynx	3_carcinoma	cancer_unmatched_solid
cell lines	CNhs11872	thyroid carcinoma cell line:TCO-1	thyroid carcinoma cell line:TCO-1		thyroid	3_carcinoma	cancer_unmatched_solid
cell lines	CNhs11875	choriocarcinoma cell line:SCH	choriocarcinoma cell line:SCH		stomach	3_carcinoma	cancer_unmatched_solid
cell lines	CNhs11878	teratocarcinoma cell line:NCC-IT-A3	teratocarcinoma cell line:NCC-IT-A3		mediastinum	3_carcinoma	cancer_unmatched_solid
cell lines	CNhs11884	teratocarcinoma cell line:NCR-G1	teratocarcinoma cell line:NCR-G1		testis	3_carcinoma	cancer_unmatched_solid
cell lines	CNhs11889	anaplastic squamous cell carcinoma cell line:RPMI 2650	anaplastic squamous cell carcinoma cell line:RPMI 2650		nasal septum	3_carcinoma	cancer_unmatched_solid
cell lines	CNhs11930	clear cell carcinoma cell line:TEN	clear cell carcinoma cell line:TEN		endometrium	3_carcinoma	cancer_unmatched_solid
cell lines	CNhs11932	basal cell carcinoma cell line:TE 354.T	basal cell carcinoma cell line:TE 354.T		skin	3_carcinoma	cancer_unmatched_solid
cell lines	CNhs12325	epitheloid carcinoma cell line: HelaS3 ENCODE, biol_rep1	epitheloid carcinoma cell line: HelaS3 ENCODE replicate 1		cervix	3_carcinoma	cancer_unmatched_solid
cell lines	CNhs12326	epitheloid carcinoma cell line: HelaS3 ENCODE, biol_rep2	epitheloid carcinoma cell line: HelaS3 ENCODE replicate 2		cervix	3_carcinoma	cancer_unmatched_solid
cell lines	CNhs12327	epitheloid carcinoma cell line: HelaS3 ENCODE, biol_rep3	epitheloid carcinoma cell line: HelaS3 ENCODE replicate 3		cervix	3_carcinoma	cancer_unmatched_solid
cell lines	CNhs12838	merkel cell carcinoma cell line:MKL-1	merkel cell carcinoma cell line:MKL-1		skin	3_carcinoma	cancer_unmatched_solid
cell lines	CNhs12839	merkel cell carcinoma cell line:MS-1	merkel cell carcinoma cell line:MS-1		skin	3_carcinoma	cancer_unmatched_solid
cell lines	CNhs10734	papillotubular adenocarcinoma cell line:TGBC18TKB	papillotubular adenocarcinoma cell line:TGBC18TKB	79 year old adult	duodenum	adenocarcinoma	cancer_unmatched_solid
cell lines	CNhs11716	papillary adenocarcinoma cell line:8505C	papillary adenocarcinoma cell line:8505C		thyroid	adenocarcinoma	cancer_unmatched_solid
cell lines	CNhs11737	gastric adenocarcinoma cell line:MKN1	gastric adenocarcinoma cell line:MKN1		stomach	adenocarcinoma	cancer_unmatched_solid
cell lines	CNhs11748	endometrioid adenocarcinoma cell line:JHUEM-1	endometrioid adenocarcinoma cell line:JHUEM-1		uterus	adenocarcinoma	cancer_unmatched_solid
cell lines	CNhs11819	gastric adenocarcinoma cell line:MKN45	gastric adenocarcinoma cell line:MKN45		stomach	adenocarcinoma	cancer_unmatched_solid
cell lines	CNhs11882	adenocarcinoma cell line:IM95m	adenocarcinoma cell line:IM95m		stomach	adenocarcinoma	cancer_unmatched_solid
cell lines	CNhs11883	tubular adenocarcinoma cell line:SUIT-2	tubular adenocarcinoma cell line:SUIT-2		pancreas	adenocarcinoma	cancer_unmatched_solid
cell lines	CNhs11893	adrenal cortex adenocarcinoma cell line:SW-13	adrenal cortex adenocarcinoma cell line:SW-13		adrenal gland	adenocarcinoma	cancer_unmatched_solid
cell lines	CNhs13099	serous adenocarcinoma cell line:SK-OV-3-R, biol_rep1	serous adenocarcinoma cell line:SK-OV-3-R		bone marrow	adenocarcinoma	cancer_unmatched_solid
cell lines	CNhs13508	serous adenocarcinoma cell line:SK-OV-3-R after co-culture with SOC-57-02-G, biol_rep1	serous adenocarcinoma cell line:SK-OV-3-R after co-culture with SOC-57-02-G		bone marrow	adenocarcinoma	cancer_unmatched_solid
cell lines	CNhs10728	extraskeletal myxoid chondrosarcoma cell line:H-EMC-SS	extraskeletal myxoid chondrosarcoma cell line:H-EMC-SS	77 year old adult	ANATOMICAL SYSTEM	4_sarcoma	cancer_unmatched_solid
cell lines	CNhs11244	synovial sarcoma cell line:HS-SY-II	synovial sarcoma cell line:HS-SY-II		synovium	4_sarcoma	cancer_unmatched_solid
cell lines	CNhs11247	epithelioid sarcoma cell line:HS-ES-1	epithelioid sarcoma cell line:HS-ES-1		ANATOMICAL SYSTEM	4_sarcoma	cancer_unmatched_solid
cell lines	CNhs11249	endometrial stromal sarcoma cell line:OMC-9	endometrial stromal sarcoma cell line:OMC-9	55 year old adult	endometrium	4_sarcoma	cancer_unmatched_solid
cell lines	CNhs11269	rhabdomyosarcoma cell line:RMS-YM	rhabdomyosarcoma cell line:RMS-YM		skeletal muscle	4_sarcoma	cancer_unmatched_solid
cell lines	CNhs11729	myxofibrosarcoma cell line:MFH-ino	myxofibrosarcoma cell line:MFH-ino		ANATOMICAL SYSTEM	4_sarcoma	cancer_unmatched_solid
cell lines	CNhs11747	carcinosarcoma cell line:JHUCS-1	carcinosarcoma cell line:JHUCS-1		uterus	4_sarcoma	cancer_unmatched_solid
cell lines	CNhs11821	myxofibrosarcoma cell line:NMFH-1	myxofibrosarcoma cell line:NMFH-1		unclassifiable	4_sarcoma	cancer_unmatched_solid
cell lines	CNhs11851	liposarcoma cell line:SW 872	liposarcoma cell line:SW 872		unclassifiable	4_sarcoma	cancer_unmatched_solid
cell lines	CNhs11856	pagetoid sarcoma cell line:Hs 925.T	pagetoid sarcoma cell line:Hs 925.T		skin	4_sarcoma	cancer_unmatched_solid
cell lines	CNhs11857	spindle cell sarcoma cell line:Hs 132.T	spindle cell sarcoma cell line:Hs 132.T		connective tissue	4_sarcoma	cancer_unmatched_solid
cell lines	CNhs11860	fibrosarcoma cell line:HT-1080	fibrosarcoma cell line:HT-1080		pelvis	4_sarcoma	cancer_unmatched_solid
cell lines	CNhs11870	liposarcoma cell line:KMLS-1	liposarcoma cell line:KMLS-1		retroperitoneum	4_sarcoma	cancer_unmatched_solid
cell lines	CNhs11877	rhabdomyosarcoma cell line:KYM-1	rhabdomyosarcoma cell line:KYM-1		neck	4_sarcoma	cancer_unmatched_solid
time courses	CNhs12859	Saos-2 osteosarcoma treated with ascorbic acid and BGP to induce calcification, 00hr00min, biol_rep2 (A2 T0)	Saos-2 osteosarcoma cell line 0min after induction of calcification with ascorbate and BPG (A2 T0)			4_sarcoma	cancer_unmatched_solid
time courses	CNhs12952	Saos-2 osteosarcoma treated with ascorbic acid and BGP to induce calcification, 00hr00min, biol_rep3 (A3 T0)	Saos-2 osteosarcoma cell line 0min after induction of calcification with ascorbate and BPG (A3 T0)			4_sarcoma	cancer_unmatched_solid
cell lines	CNhs10730	malignant trichilemmal cyst cell line:DJM-1	malignant trichilemmal cyst cell line:DJM-1	hair follicle	hair follicle, outer root sheath cell	5_other_solid_tumors	cancer_unmatched_solid
cell lines	CNhs10732	maxillary sinus tumor cell line:HSQ-89	maxillary sinus tumor cell line:HSQ-89	sinus	unclassifiable	5_other_solid_tumors	cancer_unmatched_solid
cell lines	CNhs11183	schwannoma cell line:HS-PSS	schwannoma cell line:HS-PSS	peripheral nervous system	schwann cell	5_other_solid_tumors	cancer_unmatched_solid
cell lines	CNhs11245	schwannoma cell line:HS-PSS	schwannoma cell line:HS-PSS	peripheral nervous system	schwann cell	5_other_solid_tumors	cancer_unmatched_solid
cell lines	CNhs11255	rectal cancer cell line:TT1TKB	rectal cancer cell line:TT1TKB	rectum	unclassifiable	5_other_solid_tumors	cancer_unmatched_solid
cell lines	CNhs11267	retinoblastoma cell line:Y79	retinoblastoma cell line:Y79	eye	unclassifiable	5_other_solid_tumors	cancer_unmatched_solid
cell lines	CNhs11276	neuroblastoma cell line:CHP-134	neuroblastoma cell line:CHP-134	adrenal gland	neuroblast	5_other_solid_tumors	cancer_unmatched_solid
cell lines	CNhs11284	neuroblastoma cell line:NB-1	neuroblastoma cell line:NB-1	adrenal gland	neuroblast	5_other_solid_tumors	cancer_unmatched_solid
cell lines	CNhs11286	gastric cancer cell line:AZ521	gastric cancer cell line:AZ521	stomach	unclassifiable	5_other_solid_tumors	cancer_unmatched_solid
cell lines	CNhs11722	leiomyoma cell line:10964C	leiomyoma cell line:10964C	uterus	smooth muscle cell	5_other_solid_tumors	cancer_unmatched_solid
cell lines	CNhs11723	leiomyoma cell line:15242A	leiomyoma cell line:15242A	uterus	smooth muscle cell	5_other_solid_tumors	cancer_unmatched_solid
cell lines	CNhs11724	leiomyoma cell line:15425	leiomyoma cell line:15425	uterus	smooth muscle cell	5_other_solid_tumors	cancer_unmatched_solid
cell lines	CNhs11742	hepatoblastoma cell line:HuH-6	hepatoblastoma cell line:HuH-6	liver	hepatoblast	5_other_solid_tumors	cancer_unmatched_solid
cell lines	CNhs11750	lens epithelial cell line:SRA 01/04	lens epithelial cell line:SRA 01/04	eye	lens epithelial cell	5_other_solid_tumors	cancer_unmatched_solid
cell lines	CNhs11818	neuroblastoma cell line:NBsusSR	neuroblastoma cell line:NBsusSR	pelvis	neuroblast	5_other_solid_tumors	cancer_unmatched_solid
cell lines	CNhs11828	tridermal teratoma cell line:HGRT	tridermal teratoma cell line:HGRT	ANATOMICAL SYSTEM	unclassifiable	5_other_solid_tumors	cancer_unmatched_solid
cell lines	CNhs11829	sacrococcigeal teratoma cell line:HTST	sacrococcigeal teratoma cell line:HTST	ANATOMICAL SYSTEM	unclassifiable	5_other_solid_tumors	cancer_unmatched_solid
cell lines	CNhs11830	peripheral neuroectodermal tumor cell line:KU-SN	peripheral neuroectodermal tumor cell line:KU-SN	peripheral nervous system	unclassifiable	5_other_solid_tumors	cancer_unmatched_solid
cell lines	CNhs11854	neurofibroma cell line:Hs 53.T	neurofibroma cell line:Hs 53.T	peripheral nervous system	schwann cell	5_other_solid_tumors	cancer_unmatched_solid
cell lines	CNhs11866	neuroectodermal tumor cell line:TASK1	neuroectodermal tumor cell line:TASK1	thorax	unclassifiable	5_other_solid_tumors	cancer_unmatched_solid
cell lines	CNhs11868	hepatic mesenchymal tumor cell line:LI90	hepatic mesenchymal tumor cell line:LI90	liver	adipocyte, lipocyte of liver	5_other_solid_tumors	cancer_unmatched_solid
cell lines	CNhs11869	somatostatinoma cell line:QGP-1	somatostatinoma cell line:QGP-1	pancreas	pancreatic delta cell	5_other_solid_tumors	cancer_unmatched_solid
cell lines	CNhs11880	keratoacanthoma cell line:HKA-1	keratoacanthoma cell line:HKA-1	skin	unclassifiable	5_other_solid_tumors	cancer_unmatched_solid
cell lines	CNhs11885	small cell cervical cancer cell line:HCSC-1	small cell cervical cancer cell line:HCSC-1	cervix	unclassifiable	5_other_solid_tumors	cancer_unmatched_solid
cell lines	CNhs11944	mixed mullerian tumor cell line:HTMMT	mixed mullerian tumor cell line:HTMMT	endometrium	unclassifiable	5_other_solid_tumors	cancer_unmatched_solid
cell lines	CNhs12191	mesodermal tumor cell line:HIRS-BM	mesodermal tumor cell line:HIRS-BM	ANATOMICAL SYSTEM	unclassifiable	5_other_solid_tumors	cancer_unmatched_solid
cell lines	CNhs12193	non-small cell lung cancer cell line:NCI-H1385	non-small cell lung cancer cell line:NCI-H1385	lung	neuroendocrine cell	5_other_solid_tumors	cancer_unmatched_solid
primary cells	CNhs10837	Endothelial Cells - Aortic, donor0	Endothelial Cells - Aortic donor0	aorta	blood vessel endothelial cell	primary_cells.adult	normal_unmatched_solid
primary cells	CNhs10838	Smooth Muscle Cells - Aortic, donor0	Smooth Muscle Cells - Aortic donor0	aorta	smooth muscle cell	primary_cells.adult	normal_unmatched_solid
primary cells	CNhs10839	Smooth Muscle Cells - Umbilical artery, donor0	Smooth Muscle Cells - Umbilical artery donor0	umbilical artery	smooth muscle cell	primary_cells.adult	normal_unmatched_solid
primary cells	CNhs10842	Retinal Pigment Epithelial Cells, donor0	Retinal Pigment Epithelial Cells donor0	retina	retinal pigment epithelial cell	primary_cells.adult	normal_unmatched_solid
primary cells	CNhs10843	Urothelial cells, donor0	Urothelial cells donor0	bladder	urothelial cell	primary_cells.adult	normal_unmatched_solid
primary cells	CNhs10847	Sebocyte, donor1	Sebocyte donor1	skin	sebocyte	primary_cells.adult	normal_unmatched_solid
primary cells	CNhs10848	Fibroblast - Gingival, donor4 (GFH2)	Fibroblast - Gingival donor4 (GFH2 )	gum	fibroblast	primary_cells.adult	normal_unmatched_solid
primary cells	CNhs10851	Sertoli Cells, donor1	Sertoli Cells donor1	testis	sertoli cell	primary_cells.adult	normal_unmatched_solid
primary cells	CNhs10859	Natural Killer Cells, donor1	Natural Killer Cells donor1	blood	natural killer cell	primary_cells.adult	normal_unmatched_solid
primary cells	CNhs10860	Peripheral Blood Mononuclear Cells, donor1	Peripheral Blood Mononuclear Cells donor1	blood	mononuclear cell	primary_cells.adult	normal_unmatched_solid
primary cells	CNhs10874	Fibroblast - Aortic Adventitial, donor1	Fibroblast - Aortic Adventitial donor1	aorta	fibroblast	primary_cells.adult	normal_unmatched_solid
primary cells	CNhs10875	Intestinal epithelial cells (polarized), donor1	Intestinal epithelial cells donor1	small intestine	epithelial cell, intestinal	primary_cells.adult	normal_unmatched_solid
primary cells	CNhs10876	Anulus Pulposus Cell, donor1	Anulus Pulposus Cell donor1	spinal cord	anulus fibrosus cell of intervertebral disc	primary_cells.adult	normal_unmatched_solid
primary cells	CNhs10877	Pancreatic stromal cells, donor1	Pancreatic stromal cells donor1	pancreas	pancreatic stromal cell	primary_cells.adult	normal_unmatched_solid
primary cells	CNhs10878	Fibroblast - Pulmonary Artery, donor1	Fibroblast - Pulmonary Artery donor1	pulmonary artery	fibroblast	primary_cells.adult	normal_unmatched_solid
primary cells	CNhs10879	Keratinocyte - oral, donor1	Keratinocyte - oral donor1	gum	keratinocyte	primary_cells.adult	normal_unmatched_solid
primary cells	CNhs10881	Nucleus Pulposus Cell, donor1	Nucleus Pulposus Cell donor1	spinal cord	nucleus pulposus cell of intervertebral disc	primary_cells.adult	normal_unmatched_solid
primary cells	CNhs10883	Prostate Stromal Cells, donor1	Prostate Stromal Cells donor1	prostate	prostatic stromal cell	primary_cells.adult	normal_unmatched_solid
primary cells	CNhs11051	Adipocyte - breast, donor1	Adipocyte - breast donor1	breast	adipocyte	primary_cells.adult	normal_unmatched_solid
primary cells	CNhs11052	Preadipocyte - breast, donor1	Preadipocyte - breast donor1	breast	preadipocyte	primary_cells.adult	normal_unmatched_solid
primary cells	CNhs11054	Adipocyte - omental, donor1	Adipocyte - omental donor1			primary_cells.adult	normal_unmatched_solid
primary cells	CNhs11061	Gingival epithelial cells, donor1 (GEA11)	Gingival epithelial cells donor1 (GEA11 )	gum	epithelial cell	primary_cells.adult	normal_unmatched_solid
primary cells	CNhs11064	Keratinocyte - epidermal, donor1	Keratinocyte - epidermal donor1	skin	keratinocyte	primary_cells.adult	normal_unmatched_solid
primary cells	CNhs11065	Preadipocyte - omental, donor1	Preadipocyte - omental donor1	omentum	preadipocyte	primary_cells.adult	normal_unmatched_solid
primary cells	CNhs11082	Preadipocyte - visceral, donor1	Preadipocyte - visceral donor1	heart	preadipocyte	primary_cells.adult	normal_unmatched_solid
primary cells	CNhs11083	Skeletal Muscle Cells, donor1	Skeletal Muscle Cells donor1	skeletal muscle	skeletal muscle cell	primary_cells.adult	normal_unmatched_solid
primary cells	CNhs11084	Skeletal muscle cells differentiated into Myotubes - multinucleated, donor1	Skeletal muscle cells differentiated into Myotubes - multinucleated donor1	skeletal muscle	skeletal muscle cell	primary_cells.adult	normal_unmatched_solid
primary cells	CNhs11085	Smooth Muscle Cells - Aortic, donor1	Smooth Muscle Cells - Aortic donor1	aorta	smooth muscle cell	primary_cells.adult	normal_unmatched_solid
primary cells	CNhs11086	Smooth Muscle Cells - Brachiocephalic, donor1	Smooth Muscle Cells - Brachiocephalic donor1	brachiocephalic artery	smooth muscle cell	primary_cells.adult	normal_unmatched_solid
primary cells	CNhs11087	Smooth Muscle Cells - Carotid, donor1	Smooth Muscle Cells - Carotid donor1	carotid artery	smooth muscle cell	primary_cells.adult	normal_unmatched_solid
primary cells	CNhs11088	Smooth Muscle Cells - Coronary Artery, donor1	Smooth Muscle Cells - Coronary Artery donor1	coronary artery	smooth muscle cell	primary_cells.adult	normal_unmatched_solid
primary cells	CNhs11090	Smooth Muscle Cells - Subclavian Artery, donor1	Smooth Muscle Cells - Subclavian Artery donor1	subclavian artery	smooth muscle cell	primary_cells.adult	normal_unmatched_solid
primary cells	CNhs11091	Smooth Muscle Cells - Umbilical Artery, donor1	Smooth Muscle Cells - Umbilical Artery donor1	umbilical artery	smooth muscle cell	primary_cells.adult	normal_unmatched_solid
primary cells	CNhs11092	Tracheal Epithelial Cells, donor1	Tracheal Epithelial Cells donor1	trachea	tracheal epithelial cell	primary_cells.adult	normal_unmatched_solid
primary cells	CNhs11305	Smooth Muscle Cells - Aortic, donor2	Smooth Muscle Cells - Aortic donor2	aorta	smooth muscle cell	primary_cells.adult	normal_unmatched_solid
primary cells	CNhs11309	Smooth Muscle Cells - Aortic, donor3	Smooth Muscle Cells - Aortic donor3	aorta	smooth muscle cell	primary_cells.adult	normal_unmatched_solid
primary cells	CNhs11319	Fibroblast - Choroid Plexus, donor1	Fibroblast - Choroid Plexus donor1	choroid plexus	fibroblast	primary_cells.adult	normal_unmatched_solid
primary cells	CNhs11320	Meningeal Cells, donor1	Meningeal Cells donor1	meninges	meningeal cell	primary_cells.adult	normal_unmatched_solid
primary cells	CNhs11322	Fibroblast - Lymphatic, donor1	Fibroblast - Lymphatic donor1	lymph node	fibroblast	primary_cells.adult	normal_unmatched_solid
primary cells	CNhs11323	Esophageal Epithelial Cells, donor1	Esophageal Epithelial Cells donor1	esophagus	esophageal epithelial cell	primary_cells.adult	normal_unmatched_solid
primary cells	CNhs11324	Smooth Muscle Cells - Esophageal, donor1	Smooth Muscle Cells - Esophageal donor1	esophagus	smooth muscle cell	primary_cells.adult	normal_unmatched_solid
primary cells	CNhs11328	Smooth Muscle Cells - Bronchial, donor1	Smooth Muscle Cells - Bronchial donor1	lung	smooth muscle cell	primary_cells.adult	normal_unmatched_solid
primary cells	CNhs11329	Smooth Muscle Cells - Tracheal, donor1	Smooth Muscle Cells - Tracheal donor1	lung	smooth muscle cell	primary_cells.adult	normal_unmatched_solid
primary cells	CNhs11334	Urothelial Cells, donor1	Urothelial Cells donor1	bladder	urothelial cell	primary_cells.adult	normal_unmatched_solid
primary cells	CNhs11335	Hepatic Stellate Cells (lipocyte), donor1	Hepatic Stellate Cells (lipocyte) donor1	liver	adipocyte, lipocyte of liver	primary_cells.adult	normal_unmatched_solid
primary cells	CNhs11336	Corneal Epithelial Cells, donor1	Corneal Epithelial Cells donor1	eye	corneal epithelial cell	primary_cells.adult	normal_unmatched_solid
primary cells	CNhs11337	Keratocytes, donor1	Keratocytes donor1	eye	keratocyte	primary_cells.adult	normal_unmatched_solid
primary cells	CNhs11338	Retinal Pigment Epithelial Cells, donor1	Retinal Pigment Epithelial Cells donor1	eye	retinal pigment epithelial cell	primary_cells.adult	normal_unmatched_solid
primary cells	CNhs11339	Fibroblast - Conjunctival, donor1	Fibroblast - Conjunctival donor1	eye	fibroblast	primary_cells.adult	normal_unmatched_solid
primary cells	CNhs11340	Trabecular Meshwork Cells, donor1	Trabecular Meshwork Cells donor1	eye	trabecular meshwork cell	primary_cells.adult	normal_unmatched_solid
primary cells	CNhs11341	Amniotic Epithelial Cells, donor1	Amniotic Epithelial Cells donor1	amnion	amniotic epithelial cell	primary_cells.adult	normal_unmatched_solid
primary cells	CNhs11351	Fibroblast - skin normal, donor1	Fibroblast - skin normal donor 1	skin	fibroblast	primary_cells.adult	normal_unmatched_solid
primary cells	CNhs11371	Adipocyte - subcutaneous, donor2	Adipocyte - subcutaneous donor2	adipose tissue	adipocyte	primary_cells.adult	normal_unmatched_solid
primary cells	CNhs11372	Chondrocyte - de diff, donor2	Chondrocyte - de diff donor2	cartilage	chondroblast	primary_cells.adult	normal_unmatched_solid
primary cells	CNhs11373	Chondrocyte - re diff, donor2	Chondrocyte - re diff donor2	cartilage	chondrocyte	primary_cells.adult	normal_unmatched_solid
primary cells	CNhs11375	Endothelial Cells - Aortic, donor2	Endothelial Cells - Aortic donor2	aorta	blood vessel endothelial cell	primary_cells.adult	normal_unmatched_solid
primary cells	CNhs11376	Endothelial Cells - Microvascular, donor2	Endothelial Cells - Microvascular donor2	capillary	blood vessel endothelial cell	primary_cells.adult	normal_unmatched_solid
primary cells	CNhs11377	Endothelial Cells - Vein, donor2	Endothelial Cells - Vein donor2	vein	blood vessel endothelial cell	primary_cells.adult	normal_unmatched_solid
primary cells	CNhs11378	Fibroblast - Cardiac, donor2	Fibroblast - Cardiac donor2	heart	fibroblast	primary_cells.adult	normal_unmatched_solid
primary cells	CNhs11379	Fibroblast - Dermal, donor2	Fibroblast - Dermal donor2	skin	fibroblast	primary_cells.adult	normal_unmatched_solid
primary cells	CNhs11381	Keratinocyte - epidermal, donor2	Keratinocyte - epidermal donor2	skin	keratinocyte	primary_cells.adult	normal_unmatched_solid
primary cells	CNhs11386	Placental Epithelial Cells, donor2	Placental Epithelial Cells donor2	placenta	placental epithelial cell	primary_cells.adult	normal_unmatched_solid
primary cells	CNhs11896	Gingival epithelial cells, donor2 (GEA14)	Gingival epithelial cells donor2 (GEA14 )	gum	epithelial cell	primary_cells.adult	normal_unmatched_solid
primary cells	CNhs11902	Preadipocyte - omental, donor2	Preadipocyte - omental donor2	omentum	preadipocyte	primary_cells.adult	normal_unmatched_solid
primary cells	CNhs11903	Gingival epithelial cells, donor3 (GEA15)	Gingival epithelial cells donor3 (GEA15 )	gum	epithelial cell	primary_cells.adult	normal_unmatched_solid
primary cells	CNhs11908	Myoblast, donor3	Myoblast donor3	skeletal muscle	skeletal muscle myoblast	primary_cells.adult	normal_unmatched_solid
primary cells	CNhs11920	Smooth Muscle Cells - Prostate, donor1	Smooth Muscle Cells - Prostate donor1	prostate	smooth muscle cell	primary_cells.adult	normal_unmatched_solid
primary cells	CNhs11923	Chondrocyte - de diff, donor1	Chondrocyte - de diff donor1	cartilage	chondroblast	primary_cells.adult	normal_unmatched_solid
primary cells	CNhs11925	Endothelial Cells - Microvascular, donor1	Endothelial Cells - Microvascular donor1	capillary	blood vessel endothelial cell	primary_cells.adult	normal_unmatched_solid
primary cells	CNhs11926	Endothelial Cells - Thoracic, donor1	Endothelial Cells - Thoracic donor1	internal thoracic artery	blood vessel endothelial cell	primary_cells.adult	normal_unmatched_solid
primary cells	CNhs11927	Smooth Muscle Cells - Uterine, donor3	Smooth Muscle Cells - Uterine donor3	uterus	smooth muscle cell	primary_cells.adult	normal_unmatched_solid
primary cells	CNhs11948	Whole blood (ribopure), donor090309, donation3	Whole blood (ribopure) - donor 090309 repurified donation 3	blood	CELL MIXTURE - tissue sample	primary_cells.adult	normal_unmatched_solid
primary cells	CNhs11949	Whole blood (ribopure), donor090612, donation3	Whole blood (ribopure) - donor 090612 repurified donation 3	blood	CELL MIXTURE - tissue sample	primary_cells.adult	normal_unmatched_solid
primary cells	CNhs11951	Sebocyte, donor2	Sebocyte donor2	skin	sebocyte	primary_cells.adult	normal_unmatched_solid
primary cells	CNhs11952	Fibroblast - Gingival, donor5 (GFH3)	Fibroblast - Gingival donor5 (GFH3 )	gum	fibroblast	primary_cells.adult	normal_unmatched_solid
primary cells	CNhs11953	Fibroblast - Periodontal Ligament, donor5 (PL30)	Fibroblast - Periodontal Ligament donor5 (PL30 )	periodontal ligament	fibroblast	primary_cells.adult	normal_unmatched_solid
primary cells	CNhs11957	Natural Killer Cells, donor2	Natural Killer Cells donor2	blood	natural killer cell	primary_cells.adult	normal_unmatched_solid
primary cells	CNhs11958	Peripheral Blood Mononuclear Cells, donor2	Peripheral Blood Mononuclear Cells donor2	blood	mononuclear cell	primary_cells.adult	normal_unmatched_solid
primary cells	CNhs11965	Myoblast, donor2	Myoblast donor2	skeletal muscle	skeletal muscle myoblast	primary_cells.adult	normal_unmatched_solid
primary cells	CNhs11969	Adipocyte - breast, donor2	Adipocyte - breast donor2	breast	adipocyte	primary_cells.adult	normal_unmatched_solid
primary cells	CNhs11971	Preadipocyte - breast, donor2	Preadipocyte - breast donor2	breast	preadipocyte	primary_cells.adult	normal_unmatched_solid
primary cells	CNhs11973	Prostate Stromal Cells, donor2	Prostate Stromal Cells donor2	prostate	prostatic stromal cell	primary_cells.adult	normal_unmatched_solid
primary cells	CNhs11976	Smooth Muscle Cells - Prostate, donor2	Smooth Muscle Cells - Prostate donor2	prostate	smooth muscle cell	primary_cells.adult	normal_unmatched_solid
primary cells	CNhs11977	Endothelial Cells - Artery, donor2	Endothelial Cells - Artery donor2	artery	blood vessel endothelial cell	primary_cells.adult	normal_unmatched_solid
primary cells	CNhs11978	Endothelial Cells - Thoracic, donor2	Endothelial Cells - Thoracic donor2	internal thoracic artery	blood vessel endothelial cell	primary_cells.adult	normal_unmatched_solid
primary cells	CNhs11979	Hair Follicle Dermal Papilla Cells, donor2	Hair Follicle Dermal Papilla Cells donor2	hair follicle	hair follicle, dermal papilla cell	primary_cells.adult	normal_unmatched_solid
primary cells	CNhs11987	Smooth Muscle Cells - Coronary Artery, donor2	Smooth Muscle Cells - Coronary Artery donor2	coronary artery	smooth muscle cell	primary_cells.adult	normal_unmatched_solid
primary cells	CNhs11988	Smooth Muscle Cells - Internal Thoracic Artery, donor2	Smooth Muscle Cells - Internal Thoracic Artery donor2	internal thoracic artery	smooth muscle cell	primary_cells.adult	normal_unmatched_solid
primary cells	CNhs11989	Smooth Muscle Cells - Pulmonary Artery, donor2	Smooth Muscle Cells - Pulmonary Artery donor2	pulmonary artery	smooth muscle cell	primary_cells.adult	normal_unmatched_solid
primary cells	CNhs11990	Smooth Muscle Cells - Subclavian Artery, donor2	Smooth Muscle Cells - Subclavian Artery donor2	subclavian artery	smooth muscle cell	primary_cells.adult	normal_unmatched_solid
primary cells	CNhs11991	Smooth Muscle Cells - Umbilical Artery, donor2	Smooth Muscle Cells - Umbilical Artery donor2	umbilical artery	smooth muscle cell	primary_cells.adult	normal_unmatched_solid
primary cells	CNhs11992	Synoviocyte, donor2	Synoviocyte donor2	synovium	synovial cell	primary_cells.adult	normal_unmatched_solid
primary cells	CNhs11993	Tracheal Epithelial Cells, donor2	Tracheal Epithelial Cells donor2	trachea	tracheal epithelial cell	primary_cells.adult	normal_unmatched_solid
primary cells	CNhs11996	Fibroblast - Periodontal Ligament, donor6 (PLH3)	Fibroblast - Periodontal Ligament donor6 (PLH3 )	periodontal ligament	fibroblast	primary_cells.adult	normal_unmatched_solid
primary cells	CNhs12001	Natural Killer Cells, donor3	Natural Killer Cells donor3	blood	natural killer cell	primary_cells.adult	normal_unmatched_solid
primary cells	CNhs12002	Peripheral Blood Mononuclear Cells, donor3	Peripheral Blood Mononuclear Cells donor3	blood	mononuclear cell	primary_cells.adult	normal_unmatched_solid
primary cells	CNhs12011	Fibroblast - Aortic Adventitial, donor3	Fibroblast - Aortic Adventitial donor3	aorta	fibroblast	primary_cells.adult	normal_unmatched_solid
primary cells	CNhs12013	Preadipocyte - omental, donor3	Preadipocyte - omental donor3	omentum	preadipocyte	primary_cells.adult	normal_unmatched_solid
primary cells	CNhs12015	Prostate Stromal Cells, donor3	Prostate Stromal Cells donor3	prostate	prostatic stromal cell	primary_cells.adult	normal_unmatched_solid
primary cells	CNhs12017	Adipocyte - subcutaneous, donor3	Adipocyte - subcutaneous donor3	adipose tissue	adipocyte	primary_cells.adult	normal_unmatched_solid
primary cells	CNhs12019	Nucleus Pulposus Cell, donor2	Nucleus Pulposus Cell donor2	spinal cord	nucleus pulposus cell of intervertebral disc	primary_cells.adult	normal_unmatched_solid
primary cells	CNhs12020	Chondrocyte - de diff, donor3	Chondrocyte - de diff donor3	cartilage	chondroblast	primary_cells.adult	normal_unmatched_solid
primary cells	CNhs12021	Chondrocyte - re diff, donor3	Chondrocyte - re diff donor3	cartilage	chondrocyte	primary_cells.adult	normal_unmatched_solid
primary cells	CNhs12022	Endothelial Cells - Aortic, donor3	Endothelial Cells - Aortic donor3	aorta	blood vessel endothelial cell	primary_cells.adult	normal_unmatched_solid
primary cells	CNhs12023	Endothelial Cells - Artery, donor3	Endothelial Cells - Artery donor3	artery	blood vessel endothelial cell	primary_cells.adult	normal_unmatched_solid
primary cells	CNhs12024	Endothelial Cells - Microvascular, donor3	Endothelial Cells - Microvascular donor3	capillary	blood vessel endothelial cell	primary_cells.adult	normal_unmatched_solid
primary cells	CNhs12026	Endothelial Cells - Vein, donor3	Endothelial Cells - Vein donor3	vein	blood vessel endothelial cell	primary_cells.adult	normal_unmatched_solid
primary cells	CNhs12027	Fibroblast - Cardiac, donor3	Fibroblast - Cardiac donor3	heart	fibroblast	primary_cells.adult	normal_unmatched_solid
primary cells	CNhs12028	Fibroblast - Dermal, donor3	Fibroblast - Dermal donor3	skin	fibroblast	primary_cells.adult	normal_unmatched_solid
primary cells	CNhs12030	Hair Follicle Dermal Papilla Cells, donor3	Hair Follicle Dermal Papilla Cells donor3	hair follicle	hair follicle, dermal papilla cell	primary_cells.adult	normal_unmatched_solid
primary cells	CNhs12031	Keratinocyte - epidermal, donor3	Keratinocyte - epidermal donor3	skin	keratinocyte	primary_cells.adult	normal_unmatched_solid
primary cells	CNhs12037	Placental Epithelial Cells, donor3	Placental Epithelial Cells donor3	placenta	placental epithelial cell	primary_cells.adult	normal_unmatched_solid
primary cells	CNhs12038	Preadipocyte - subcutaneous, donor3	Preadipocyte - subcutaneous donor3	adipose tissue	preadipocyte	primary_cells.adult	normal_unmatched_solid
primary cells	CNhs12039	Preadipocyte - visceral, donor3	Preadipocyte - visceral donor3	heart	preadipocyte	primary_cells.adult	normal_unmatched_solid
primary cells	CNhs12043	Smooth Muscle Cells - Brachiocephalic, donor3	Smooth Muscle Cells - Brachiocephalic donor3	brachiocephalic artery	smooth muscle cell	primary_cells.adult	normal_unmatched_solid
primary cells	CNhs12044	Smooth Muscle Cells - Carotid, donor3	Smooth Muscle Cells - Carotid donor3	carotid artery	smooth muscle cell	primary_cells.adult	normal_unmatched_solid
primary cells	CNhs12045	Smooth Muscle Cells - Coronary Artery, donor3	Smooth Muscle Cells - Coronary Artery donor3	coronary artery	smooth muscle cell	primary_cells.adult	normal_unmatched_solid
primary cells	CNhs12046	Smooth Muscle Cells - Internal Thoracic Artery, donor3	Smooth Muscle Cells - Internal Thoracic Artery donor3	internal thoracic artery	smooth muscle cell	primary_cells.adult	normal_unmatched_solid
primary cells	CNhs12048	Smooth Muscle Cells - Subclavian Artery, donor3	Smooth Muscle Cells - Subclavian Artery donor3	subclavian artery	smooth muscle cell	primary_cells.adult	normal_unmatched_solid
primary cells	CNhs12049	Smooth Muscle Cells - Umbilical Artery, donor3	Smooth Muscle Cells - Umbilical Artery donor3	umbilical artery	smooth muscle cell	primary_cells.adult	normal_unmatched_solid
primary cells	CNhs12050	Synoviocyte, donor3	Synoviocyte donor3	synovium	synovial cell	primary_cells.adult	normal_unmatched_solid
primary cells	CNhs12051	Tracheal Epithelial Cells, donor3	Tracheal Epithelial Cells donor3	trachea	tracheal epithelial cell	primary_cells.adult	normal_unmatched_solid
primary cells	CNhs12063	Nucleus Pulposus Cell, donor3	Nucleus Pulposus Cell donor3	spinal cord	nucleus pulposus cell of intervertebral disc	primary_cells.adult	normal_unmatched_solid
primary cells	CNhs12064	Anulus Pulposus Cell, donor2	Anulus Pulposus Cell donor2	spinal cord	anulus fibrosus cell of intervertebral disc	primary_cells.adult	normal_unmatched_solid
primary cells	CNhs12065	Preadipocyte - perirenal, donor1	Preadipocyte - perirenal donor1	kidney	preadipocyte	primary_cells.adult	normal_unmatched_solid
primary cells	CNhs12067	Adipocyte - omental, donor2	Adipocyte - omental donor2			primary_cells.adult	normal_unmatched_solid
primary cells	CNhs12068	Adipocyte - omental, donor3	Adipocyte - omental donor3			primary_cells.adult	normal_unmatched_solid
primary cells	CNhs12069	Adipocyte - perirenal, donor1	Adipocyte - perirenal donor1			primary_cells.adult	normal_unmatched_solid
primary cells	CNhs12075	Hepatic Sinusoidal Endothelial Cells, donor1	Hepatic Sinusoidal Endothelial Cells donor1	liver	hepatic sinusoidal endothelial cell	primary_cells.adult	normal_unmatched_solid
primary cells	CNhs12080	Meningeal Cells, donor2	Meningeal Cells donor2	meninges	meningeal cell	primary_cells.adult	normal_unmatched_solid
primary cells	CNhs12091	Urothelial Cells, donor2	Urothelial Cells donor2	bladder	urothelial cell	primary_cells.adult	normal_unmatched_solid
primary cells	CNhs12092	Hepatic Sinusoidal Endothelial Cells, donor2	Hepatic Sinusoidal Endothelial Cells donor2	liver	hepatic sinusoidal endothelial cell	primary_cells.adult	normal_unmatched_solid
primary cells	CNhs12093	Hepatic Stellate Cells (lipocyte), donor2	Hepatic Stellate Cells (lipocyte) donor2	liver	adipocyte, lipocyte of liver	primary_cells.adult	normal_unmatched_solid
primary cells	CNhs12095	Keratocytes, donor2	Keratocytes donor2	eye	keratocyte	primary_cells.adult	normal_unmatched_solid
primary cells	CNhs12118	Fibroblast - Lymphatic, donor3	Fibroblast - Lymphatic donor3	lymph node	fibroblast	primary_cells.adult	normal_unmatched_solid
primary cells	CNhs12122	Urothelial Cells, donor3	Urothelial Cells donor3	bladder	urothelial cell	primary_cells.adult	normal_unmatched_solid
primary cells	CNhs12123	Corneal Epithelial Cells, donor3	Corneal Epithelial Cells donor3	eye	corneal epithelial cell	primary_cells.adult	normal_unmatched_solid
primary cells	CNhs12124	Trabecular Meshwork Cells, donor3	Trabecular Meshwork Cells donor3	eye	trabecular meshwork cell	primary_cells.adult	normal_unmatched_solid
primary cells	CNhs12125	Amniotic Epithelial Cells, donor3	Amniotic Epithelial Cells donor3	amnion	amniotic epithelial cell	primary_cells.adult	normal_unmatched_solid
primary cells	CNhs12339	Hair Follicle Outer Root Sheath Cells, donor1	Hair Follicle Outer Root Sheath Cells donor1	hair follicle	hair follicle, outer root sheath cell	primary_cells.adult	normal_unmatched_solid
primary cells	CNhs12341	Cardiac Myocyte, donor1	Cardiac Myocyte donor1	heart	cardiac muscle cell	primary_cells.adult	normal_unmatched_solid
primary cells	CNhs12342	Lens Epithelial Cells, donor1	Lens Epithelial Cells donor1	eye	lens epithelial cell	primary_cells.adult	normal_unmatched_solid
primary cells	CNhs12344	Fibroblast - Choroid Plexus, donor2	Fibroblast - Choroid Plexus donor2	choroid plexus	fibroblast	primary_cells.adult	normal_unmatched_solid
primary cells	CNhs12347	Hair Follicle Outer Root Sheath Cells, donor2	Hair Follicle Outer Root Sheath Cells donor2	hair follicle	hair follicle, outer root sheath cell	primary_cells.adult	normal_unmatched_solid
primary cells	CNhs12348	Smooth Muscle Cells - Bronchial, donor2	Smooth Muscle Cells - Bronchial donor2	lung	smooth muscle cell	primary_cells.adult	normal_unmatched_solid
primary cells	CNhs12350	Cardiac Myocyte, donor2	Cardiac Myocyte donor2	heart	cardiac muscle cell	primary_cells.adult	normal_unmatched_solid
primary cells	CNhs12379	amniotic membrane cells, donor3	amniotic membrane cells donor3	amnion	unclassifiable	primary_cells.adult	normal_unmatched_solid
primary cells	CNhs12380	chorionic membrane cells, donor3	chorionic membrane cells donor3	chorion	unclassifiable	primary_cells.adult	normal_unmatched_solid
primary cells	CNhs12493	Fibroblast - Periodontal Ligament, donor4 (PL29)	Fibroblast - Periodontal Ligament donor4 (PL29 )	periodontal ligament	fibroblast	primary_cells.adult	normal_unmatched_solid
primary cells	CNhs12494	Adipocyte - subcutaneous, donor1	Adipocyte - subcutaneous donor1	adipose tissue	adipocyte	primary_cells.adult	normal_unmatched_solid
primary cells	CNhs12495	Endothelial Cells - Aortic, donor1	Endothelial Cells - Aortic donor1	aorta	blood vessel endothelial cell	primary_cells.adult	normal_unmatched_solid
primary cells	CNhs12496	Endothelial Cells - Artery, donor1	Endothelial Cells - Artery donor1	artery	blood vessel endothelial cell	primary_cells.adult	normal_unmatched_solid
primary cells	CNhs12497	Endothelial Cells - Vein, donor1	Endothelial Cells - Vein donor1	vein	blood vessel endothelial cell	primary_cells.adult	normal_unmatched_solid
primary cells	CNhs12498	Fibroblast - Cardiac, donor1	Fibroblast - Cardiac donor1	heart	fibroblast	primary_cells.adult	normal_unmatched_solid
primary cells	CNhs12499	Fibroblast - Dermal, donor1	Fibroblast - Dermal donor1	skin	fibroblast	primary_cells.adult	normal_unmatched_solid
primary cells	CNhs12501	Hair Follicle Dermal Papilla Cells, donor1	Hair Follicle Dermal Papilla Cells donor1	hair follicle	hair follicle, dermal papilla cell	primary_cells.adult	normal_unmatched_solid
primary cells	CNhs12502	amniotic membrane cells, donor1	amniotic membrane cells donor1	amnion	unclassifiable	primary_cells.adult	normal_unmatched_solid
primary cells	CNhs12503	amniotic membrane cells, donor2	amniotic membrane cells donor2	amnion	unclassifiable	primary_cells.adult	normal_unmatched_solid
primary cells	CNhs12504	chorionic membrane cells, donor1	chorionic membrane cells donor1	chorion	unclassifiable	primary_cells.adult	normal_unmatched_solid
primary cells	CNhs12506	chorionic membrane cells, donor2	chorionic membrane cells donor2	chorion	unclassifiable	primary_cells.adult	normal_unmatched_solid
primary cells	CNhs12538	Mallassez-derived cells, donor1 (MZH3)	Mallassez-derived cells(MZH3)	gum	epithelial cell rests of Malassez	primary_cells.adult	normal_unmatched_solid
primary cells	CNhs12558	mature adipocyte, donor1	mature adipocyte donor1	adipose tissue	adipocyte	primary_cells.adult	normal_unmatched_solid
primary cells	CNhs12559	mature adipocyte, donor2	mature adipocyte donor2	adipose tissue	adipocyte	primary_cells.adult	normal_unmatched_solid
primary cells	CNhs12560	mature adipocyte, donor3	mature adipocyte donor3	adipose tissue	adipocyte	primary_cells.adult	normal_unmatched_solid
primary cells	CNhs12562	mature adipocyte, donor4	mature adipocyte donor4	adipose tissue	adipocyte	primary_cells.adult	normal_unmatched_solid
primary cells	CNhs12566	Mast cell, donor1	Mast cell donor 1 - heparinase treated	skin	mast cell	primary_cells.adult	normal_unmatched_solid
primary cells	CNhs12568	Lens Epithelial Cells, donor2	Lens Epithelial Cells donor2	eye	lens epithelial cell	primary_cells.adult	normal_unmatched_solid
primary cells	CNhs12569	Smooth Muscle Cells - Umbilical Vein, donor2	Smooth Muscle Cells - Umbilical Vein donor2	umbilical vein	smooth muscle cell	primary_cells.adult	normal_unmatched_solid
primary cells	CNhs12571	Cardiac Myocyte, donor3	Cardiac Myocyte donor3	heart	cardiac muscle cell	primary_cells.adult	normal_unmatched_solid
primary cells	CNhs12572	Lens Epithelial Cells, donor3	Lens Epithelial Cells donor3	eye	lens epithelial cell	primary_cells.adult	normal_unmatched_solid
primary cells	CNhs12574	nasal epithelial cells, donor2	nasal epithelial cells - donor 2	nasal cavity	epithelial cell	primary_cells.adult	normal_unmatched_solid
primary cells	CNhs12589	nasal epithelial cells, donor1	nasal epithelial cells - donor 1	nasal cavity	epithelial cell	primary_cells.adult	normal_unmatched_solid
primary cells	CNhs12592	Mast cell, donor4	Mast cell donor 4 - heparinase treated	skin	mast cell	primary_cells.adult	normal_unmatched_solid
primary cells	CNhs12593	Mast cell, donor3	Mast cell donor 3 - heparinase treated	skin	mast cell	primary_cells.adult	normal_unmatched_solid
primary cells	CNhs12594	Mast cell, donor2	Mast cell donor 2 - heparinase treated	skin	mast cell	primary_cells.adult	normal_unmatched_solid
primary cells	CNhs12596	Iris Pigment Epithelial Cells, donor1	Iris Pigment Epithelial Cells donor1	eye	iris pigment epithelial cell	primary_cells.adult	normal_unmatched_solid
primary cells	CNhs12597	Smooth Muscle Cells - Umbilical Vein, donor1	Smooth Muscle Cells - Umbilical Vein donor1	umbilical vein	smooth muscle cell	primary_cells.adult	normal_unmatched_solid
primary cells	CNhs12639	tenocyte, donor1	tenocyte - donor1 rep1	tendon	tenocyte	primary_cells.adult	normal_unmatched_solid
primary cells	CNhs12640	tenocyte, donor2	tenocyte - donor2	tendon	tenocyte	primary_cells.adult	normal_unmatched_solid
primary cells	CNhs12641	tenocyte, donor3	tenocyte - donor3 rep3	tendon	tenocyte	primary_cells.adult	normal_unmatched_solid
primary cells	CNhs12731	Meningeal Cells, donor3	Meningeal Cells donor3	meninges	meningeal cell	primary_cells.adult	normal_unmatched_solid
primary cells	CNhs12733	Retinal Pigment Epithelial Cells, donor3	Retinal Pigment Epithelial Cells donor3	eye	retinal pigment epithelial cell	primary_cells.adult	normal_unmatched_solid
primary cells	CNhs12810	salivary acinar cells, donor1	salivary acinar cells - donor1	parotid gland	salivary acinar cell	primary_cells.adult	normal_unmatched_solid
primary cells	CNhs12811	salivary acinar cells, donor2	salivary acinar cells - donor2	parotid gland	salivary acinar cell	primary_cells.adult	normal_unmatched_solid
primary cells	CNhs12812	salivary acinar cells, donor3	salivary acinar cells - donor3	parotid gland	salivary acinar cell	primary_cells.adult	normal_unmatched_solid
primary cells	CNhs12894	Smooth Muscle Cells - Tracheal, donor3	Smooth Muscle Cells - Tracheal donor3	lung	smooth muscle cell	primary_cells.adult	normal_unmatched_solid
primary cells	CNhs13080	Renal Glomerular Endothelial Cells, donor4	Renal Glomerular Endothelial Cells donor4			primary_cells.adult	normal_unmatched_solid
primary cells	CNhs13098	mesenchymal precursor cell - bone marrow, donor3	mesenchymal precursor cell - bone marrow donor3	bone marrow	mesenchymal precursor cell	primary_cells.adult	normal_unmatched_solid
primary cells	CNhs13535	migratory langerhans cells, donor1	migratory langerhans cells donor1		langerhans cell	primary_cells.adult	normal_unmatched_solid
primary cells	CNhs13536	migratory langerhans cells, donor2	migratory langerhans cells donor2		langerhans cell	primary_cells.adult	normal_unmatched_solid
primary cells	CNhs13537	immature langerhans cells, donor1	immature langerhans cells donor1		langerhans cell	primary_cells.adult	normal_unmatched_solid
primary cells	CNhs13547	migratory langerhans cells, donor3	migratory langerhans cells donor3		langerhans cell	primary_cells.adult	normal_unmatched_solid
primary cells	CNhs13550	Mallassez-derived cells, donor2	Mallassez-derived cells donor2	ANATOMICAL SYSTEM	epithelial cell rests of Malassez	primary_cells.adult	normal_unmatched_solid
primary cells	CNhs13551	Mallassez-derived cells, donor3	Mallassez-derived cells donor3	ANATOMICAL SYSTEM	epithelial cell rests of Malassez	primary_cells.adult	normal_unmatched_solid
primary cells	CNhs13552	CD34 cells differentiated to erythrocyte lineage, biol_ rep1	Reticulocytes replicate 1	Buffy coat		primary_cells.adult	normal_unmatched_solid
primary cells	CNhs13553	CD34 cells differentiated to erythrocyte lineage, biol_ rep2	Reticulocytes replicate 2	Buffy coat		primary_cells.adult	normal_unmatched_solid
primary cells	CNhs13816	Olfactory epithelial cells, donor1	Olfactory epithelial cells donor1	ANATOMICAL SYSTEM	CELL MIXTURE - tissue sample	primary_cells.adult	normal_unmatched_solid
primary cells	CNhs13817	Olfactory epithelial cells, donor2	Olfactory epithelial cells donor2	ANATOMICAL SYSTEM	CELL MIXTURE - tissue sample	primary_cells.adult	normal_unmatched_solid
primary cells	CNhs13818	Olfactory epithelial cells, donor3	Olfactory epithelial cells donor3	ANATOMICAL SYSTEM	CELL MIXTURE - tissue sample	primary_cells.adult	normal_unmatched_solid
primary cells	CNhs13819	Olfactory epithelial cells, donor4	Olfactory epithelial cells donor4	ANATOMICAL SYSTEM	CELL MIXTURE - tissue sample	primary_cells.adult	normal_unmatched_solid
