# Supplementary material for: Transcriptome Analysis of Recurrently Deregulated Genes across Multiple Cancers Identifies New Pan-Cancer Biomarkers
Source: Oxford University Press journal article supplement (doi:10.1158/0008-5472.can-15-0484), 2015-11-09
Supplement: 00085472can150484-sup-145596_2_supp_3145139_nzpkmp.xlsx [file 00085472can150484-sup-145596_2_supp_3145139_nzpkmp.xlsx]

## Sheet: UP DOWN
Supplementary table 2A. Results of promoter level Differential Expression Analysis by EdgeR
	matched solid		matched blood		unmatched solid
promoter	log2 FC Cancer vs. Normal	BH adj p-value	log2 FC Cancer vs. Normal	BH adj p-value	log2 FC Cancer vs. Normal	BH adj p-value	type	type1	summary
p1@PRAME	9.25	1.97294e-15	11.3	1.50704e-42	6.866	1.15458e-37	UP	Pan	Pan_UP
p1@ZIC5	8.292	9.43358e-13	6.453	1.34454e-08	3.512	1.74197e-12	UP	Pan	Pan_UP
p2@ZIC2	7.317	1.47091e-08	9.668	4.26458e-12	2.85	1.81186e-08	UP	Pan	Pan_UP
p1@LHX9	7.26	4.86642e-07	-1.134	0.46294	2.124	0.00288186	UP	Solid only	Solid_UP
p1@EU302123	7.123	0.000847997	1.893	1.22698e-05	3.702	2.6302e-08	UP	Solid only	Solid_UP
p2@ABCC2	7.093	2.81714e-05	-7.176	0.0199932	4.444	5.08106e-11	UP	Solid only	Solid_UP
p2@HOXB13	6.956	2.65643e-05	4.938	0.0141848	3.903	9.29584e-12	UP	Solid only	Solid_UP
p2@VAX1	6.918	0.00136961	0	1	5.216	1.90754e-08	UP	Solid only	Solid_UP
p3@RBM20	6.877	0.000234405	5.736	9.39265e-05	5.045	3.02469e-16	UP	Pan	Pan_UP
p1@ENST00000423311	6.844	4.65012e-12	6.306	4.70381e-35	5.42	2.48935e-58	UP	Pan	Pan_UP
p1@HOXC13	6.789	1.98697e-09	2.401	0.371523	2.296	3.25904e-06	UP	Solid only	Solid_UP
p2@POU4F1	6.639	2.12309e-05	2.545	1.88622e-05	4.027	4.75278e-17	UP	Pan	Pan_UP
p3@HOXB13	6.572	1.42088e-07	6.823	0.000209656	4.222	5.51267e-25	UP	Pan	Pan_UP
p3@ZIC2	6.565	3.97777e-08	9.278	7.78123e-12	3.36	3.607e-13	UP	Pan	Pan_UP
p2@COCH	6.524	1.13386e-07	2.97	8.24631e-07	2.816	2.77985e-12	UP	Pan	Pan_UP
p1@VAX1	6.502	0.00278517	-3.108	0.207479	5.648	2.89255e-10	UP	Solid only	Solid_UP
p1@FLJ45974	6.497	0.000163675	4.867	1.37684e-08	5.234	1.83498e-18	UP	Pan	Pan_UP
p4@DLX1	6.486	6.61284e-05	7.458	2.32935e-06	2.15	2.79751e-06	UP	Pan	Pan_UP
p2@ONECUT2	6.363	1.57614e-09	9.862	2.30183e-20	8.587	1.2586e-73	UP	Pan	Pan_UP
p2@DLX6	6.331	4.87966e-05	5.033	0.0113593	4.413	6.84245e-16	UP	Solid only	Solid_UP
p5@CADPS2	6.323	0.000541822	6.423	0.0020312	2.616	4.37093e-06	UP	Pan	Pan_UP
p1@HIST1H1T	6.217	2.46386e-07	5.497	1.34263e-22	3.822	2.87848e-17	UP	Pan	Pan_UP
p2@DLX1	6.211	1.08147e-08	6.583	9.06103e-09	2.852	6.65656e-12	UP	Pan	Pan_UP
p2@ARHGAP27	6.153	1.89438e-08	0.181	0.998941	2.499	8.20697e-08	UP	Solid only	Solid_UP
p1@PIP5KL1	6.127	0.000747586	11.133	2.8617e-09	2.18	1.64271e-07	UP	Pan	Pan_UP
p3@NUP210	6.081	1.90018e-05	1.145	6.35242e-05	3.285	3.8277e-16	UP	Solid only	Solid_UP
p1@RAET1K	6.045	1.67553e-05	2.181	9.59823e-07	3.326	3.47933e-21	UP	Pan	Pan_UP
p1@KCNH3	6.027	2.08244e-07	-4.097	3.0471e-19	2.894	1.21745e-14	UP	Solid only	Solid_UP
p1@ENST00000435984	6.026	0.000575786	0	1	3.337	1.26364e-07	UP	Solid only	Solid_UP
p3@ABCC2	5.996	0.000787744	-4.697	0.0938255	4.104	1.47794e-08	UP	Solid only	Solid_UP
p2@ENST00000448869	5.971	2.41939e-13	6.125	1.13499e-19	2.758	7.0977e-14	UP	Pan	Pan_UP
p1@ZNF98	5.938	0.00547776	5.133	1.57831e-07	3.418	2.96419e-08	UP	Pan	Pan_UP
p3@YJEFN3	5.915	1.59861e-06	1.909	3.99598e-08	2.766	4.40228e-23	UP	Solid only	Solid_UP
p1@HTR6	5.903	0.000265038	-1.612	0.0715595	2.896	7.81246e-06	UP	Solid only	Solid_UP
p3@C1QL1	5.892	2.14199e-05	6.6	0.000557405	2.874	6.73115e-11	UP	Pan	Pan_UP
p3@GPR160	5.881	3.05691e-06	1.218	0.00649522	3.587	7.40738e-15	UP	Solid only	Solid_UP
p1@ONECUT1	5.791	0.000139161	4.301	0.00116221	4.429	1.74907e-09	UP	Pan	Pan_UP
p4@HOXB13	5.774	0.000287196	4.312	0.0389582	5.628	2.29279e-20	UP	Solid only	Solid_UP
p1@COCH	5.729	3.44259e-08	2.571	3.28645e-05	2.658	9.1118e-11	UP	Pan	Pan_UP
p6@ZIC2	5.715	0.000464525	6.991	1.82549e-06	2.656	2.5036e-09	UP	Pan	Pan_UP
p1@DLX4	5.673	2.04369e-12	2.258	5.82495e-08	2.71	4.75717e-20	UP	Pan	Pan_UP
p2@DNAJC12	5.647	2.48962e-07	5.146	6.54745e-18	3.761	7.21729e-20	UP	Pan	Pan_UP
p1@ENST00000501104,p1@ENST00000528800	5.645	0.000162281	0.391	0.826808	4.232	1.0512e-12	UP	Solid only	Solid_UP
p4@TRIM11	5.638	0.000324754	5.532	9.0962e-16	3.376	6.69557e-22	UP	Pan	Pan_UP
p1@SLC10A4	5.6	0.00458274	10.743	1.7069e-11	4.534	1.04171e-14	UP	Pan	Pan_UP
p1@ZBTB8B,p4@ZBTB8A	5.558	0.00117989	1.963	0.66334	3.266	1.00323e-11	UP	Solid only	Solid_UP
p1@DLX3	5.549	5.7349e-07	7.522	2.0014e-09	3.034	4.25871e-11	UP	Pan	Pan_UP
p4@EEF1A2	5.524	8.25918e-07	6.044	1.4184e-06	4.374	4.16536e-23	UP	Pan	Pan_UP
p1@C20orf26	5.513	0.000557101	-0.307	0.867831	3.418	2.03828e-16	UP	Solid only	Solid_UP
p15@FLJ22184	5.505	0.000646546	3.195	0.00781812	3.84	3.85166e-12	UP	Pan	Pan_UP
p4@MTA3	5.494	3.59293e-11	3.398	7.76349e-06	3.358	8.62372e-28	UP	Pan	Pan_UP
p7@LHX1	5.436	3.24152e-06	1.02	0.694687	5.942	8.1108e-20	UP	Solid only	Solid_UP
p4@SEMA3E	5.432	0.0022834	0.176	1	4.146	2.37874e-13	UP	Solid only	Solid_UP
p3@RTN2	5.429	3.36669e-09	4.947	2.36347e-08	3.956	5.13279e-31	UP	Pan	Pan_UP
p3@EN2	5.392	0.000221364	3.603	0.0295953	3.927	4.55003e-13	UP	Solid only	Solid_UP
p3@PVT1	5.339	1.53709e-09	-1.271	0.0143457	2.279	4.26601e-10	UP	Solid only	Solid_UP
p6@HOXB9	5.32	2.71893e-06	5.847	4.44033e-06	3.033	2.49463e-15	UP	Pan	Pan_UP
p1@FABP6	5.304	1.76105e-06	12.569	3.02627e-18	5.269	7.00806e-32	UP	Pan	Pan_UP
p6@HKR1	5.303	0.0024937	-0.569	0.446667	2.164	1.02324e-06	UP	Solid only	Solid_UP
p2@PCDHB11	5.279	0.00083674	4.562	0.00669755	2.692	2.06204e-12	UP	Pan	Pan_UP
p1@MIR3621	5.257	4.08155e-07	1.331	0.135444	4.349	8.42907e-26	UP	Solid only	Solid_UP
p3@ACTR3B	5.255	0.00013681	1.646	0.000374271	2.132	7.08225e-15	UP	Solid only	Solid_UP
p1@ENST00000520078,p1@ENST00000520594,p1@ENST00000521622,p1@ENST00000524045	5.254	7.38421e-14	7.567	9.05771e-17	3.082	2.02456e-19	UP	Pan	Pan_UP
p1@KCNQ2	5.24	0.0026304	8.087	3.02549e-09	8.304	1.07171e-33	UP	Pan	Pan_UP
p2@ADD2	5.223	2.5232e-06	2.51	2.79011e-05	3.89	1.47586e-18	UP	Pan	Pan_UP
p1@KIAA1683	5.205	4.79001e-17	-0.688	0.101398	2.102	1.35091e-14	UP	Solid only	Solid_UP
p4@ARHGAP27	5.181	4.87595e-10	0.831	0.33212	2.57	5.38337e-10	UP	Solid only	Solid_UP
p7@ARHGAP9	5.179	0.00405387	-1.103	0.371523	2.123	1.94028e-07	UP	Solid only	Solid_UP
p2@NUP210	5.134	5.04696e-12	0.992	1.91128e-08	2.534	7.32015e-09	UP	Solid only	Solid_UP
p4@ABCC2	5.112	0.00561531	-3.688	0.108207	3.781	6.24115e-07	UP	Solid only	Solid_UP
p1@C1QL4	5.089	2.30109e-05	7.051	1.4726e-07	2.55	1.49834e-10	UP	Pan	Pan_UP
p3@MANEAL	5.086	5.03169e-07	3.963	3.46404e-24	5.326	3.0753e-61	UP	Pan	Pan_UP
p3@HOXA11-AS1	5.083	1.30247e-07	6.129	1.44106e-09	2.259	6.21498e-12	UP	Pan	Pan_UP
p4@SRSF1	5.08	0.000215198	6.968	6.10866e-25	2.485	2.86667e-20	UP	Pan	Pan_UP
p8@EPB41	5.053	0.00713946	0.424	0.438711	3.15	2.2667e-15	UP	Solid only	Solid_UP
p4@LHX6	5.021	0.000425828	9.494	3.23917e-07	5.025	1.05177e-26	UP	Pan	Pan_UP
p1@ENST00000501520,p1@uc002dpc.1	4.966	0.00104199	2.873	1.82705e-05	5.927	1.58598e-43	UP	Pan	Pan_UP
p5@HOXB8	4.964	0.00137802	3.961	0.00977096	2.319	1.10216e-05	UP	Pan	Pan_UP
p1@ADAM11	4.954	0.000130919	5.007	0.000405293	3.209	4.88748e-17	UP	Pan	Pan_UP
p1@MYEOV	4.952	1.39328e-09	4.774	2.31207e-07	4.554	2.82092e-30	UP	Pan	Pan_UP
p3@EPB41	4.928	1.96024e-08	-1.125	0.00190398	2.462	4.95078e-13	UP	Solid only	Solid_UP
p4@SIM2	4.925	0.000286675	2.43	0.371523	2.304	1.27371e-07	UP	Solid only	Solid_UP
p8@PVT1	4.921	3.22719e-05	0.713	0.174848	2.23	7.24843e-12	UP	Solid only	Solid_UP
p7@IGF2BP3	4.903	2.40328e-06	8.57	3.53825e-15	2.397	1.76165e-20	UP	Pan	Pan_UP
p1@uc003joq.1	4.895	0.000297395	6.794	0.014118	3.519	4.38798e-15	UP	Solid only	Solid_UP
p2@EPCAM	4.886	1.88753e-05	7.607	1.30154e-08	3.726	1.00123e-19	UP	Pan	Pan_UP
p5@LHX6	4.879	0.000718608	6.645	2.72214e-06	5.478	2.36617e-23	UP	Pan	Pan_UP
p1@RIMKLA	4.867	1.48544e-05	3.811	6.95914e-10	4.384	7.47206e-28	UP	Pan	Pan_UP
p4@BCL7A	4.865	0.00440756	2.959	9.27344e-06	2.485	1.60625e-11	UP	Pan	Pan_UP
p4@SLC25A12	4.818	0.00312479	0.878	0.115373	2.01	3.62501e-06	UP	Solid only	Solid_UP
p10@TFAP2A	4.796	5.35936e-07	4.934	8.72377e-06	2.773	6.63455e-16	UP	Pan	Pan_UP
p3@MCF2L	4.792	1.09743e-05	0.342	0.841009	3.217	4.19686e-12	UP	Solid only	Solid_UP
p4@HNF4G	4.791	7.5433e-05	10.678	4.98983e-14	4.271	9.38543e-21	UP	Pan	Pan_UP
p7@HOXB9	4.791	0.000501307	4.955	0.000179355	2.797	1.7408e-12	UP	Pan	Pan_UP
p1@ENST00000415226,p1@ENST00000483218	4.78	2.14808e-09	8.075	6.61855e-05	2.046	1.20417e-07	UP	Pan	Pan_UP
p1@BMP8B	4.757	5.65976e-09	3.932	3.92382e-16	3.509	1.26191e-23	UP	Pan	Pan_UP
p1@SLC17A7	4.733	0.00154789	1.612	0.148348	3.535	4.64063e-13	UP	Solid only	Solid_UP
p1@ENST00000434942	4.728	6.0092e-07	-0.507	0.476782	2.65	1.02987e-08	UP	Solid only	Solid_UP
p2@HOXB9	4.704	3.34643e-06	6.422	4.77545e-08	3.227	1.99447e-14	UP	Pan	Pan_UP
p1@EGF	4.699	0.000116952	3.399	0.00519353	2.274	7.95297e-07	UP	Pan	Pan_UP
p2@FAM59B	4.695	1.51964e-08	4.538	2.37129e-06	3.846	1.75387e-27	UP	Pan	Pan_UP
p2@ATG14	4.687	0.000766575	3.809	8.40058e-06	2.963	4.87156e-16	UP	Pan	Pan_UP
p2@TET1	4.66	1.38677e-05	9.509	5.12613e-13	3.801	2.32309e-30	UP	Pan	Pan_UP
p3@OTX1	4.654	7.02165e-05	8.967	3.65059e-24	2.343	1.61802e-12	UP	Pan	Pan_UP
p5@EEF1A2	4.651	0.00431444	5.391	0.00931518	3.025	7.24556e-09	UP	Pan	Pan_UP
p1@MAFA	4.647	0.000558552	1.216	0.0922855	3.365	1.20967e-21	UP	Solid only	Solid_UP
p3@COCH	4.634	2.29444e-06	3.995	4.47437e-13	2.745	4.19517e-12	UP	Pan	Pan_UP
p1@BC112437	4.622	8.28158e-07	2.228	1.27428e-06	2.238	7.36636e-13	UP	Pan	Pan_UP
p1@BMP7	4.576	0.00123453	12.577	2.87195e-12	5.256	4.55756e-16	UP	Pan	Pan_UP
p1@FOXA1	4.553	4.57473e-08	1.657	0.123979	2.958	6.87387e-09	UP	Solid only	Solid_UP
p1@NKD1	4.53	0.000160839	-1.507	0.00100222	4.542	6.88494e-19	UP	Solid only	Solid_UP
p3@EPHA5	4.528	0.000929147	5.379	0.0835248	4.243	2.00069e-15	UP	Solid only	Solid_UP
p3@CADPS2	4.526	0.00577811	7.543	2.46336e-05	3.79	5.14021e-14	UP	Pan	Pan_UP
p1@ENST00000416234	4.525	7.4054e-09	0.953	0.0101506	2.552	4.14515e-25	UP	Solid only	Solid_UP
p1@DLX1	4.507	1.05497e-07	7.749	9.73245e-17	2.797	3.38818e-13	UP	Pan	Pan_UP
p1@ENST00000428945	4.498	0.000187188	-1.467	0.0311207	2.887	9.52344e-17	UP	Solid only	Solid_UP
p1@KCNK5	4.487	6.67573e-05	3.815	1.91577e-18	2.77	1.76077e-10	UP	Pan	Pan_UP
p2@STOX1	4.46	0.000338511	1.718	0.00141149	2.739	2.75311e-15	UP	Solid only	Solid_UP
p2@EML6	4.457	0.000197925	2.091	0.000222836	2.788	3.52524e-20	UP	Pan	Pan_UP
p5@AARSD1	4.436	0.00533937	3.278	0.172169	2.856	5.13341e-12	UP	Solid only	Solid_UP
p2@MAST1	4.43	0.000121686	5.138	4.99636e-10	6.064	2.36089e-50	UP	Pan	Pan_UP
p1@ENST00000509144	4.427	0.000516494	4.705	0.000414784	2.78	1.94256e-11	UP	Pan	Pan_UP
p4@KIF20B	4.414	4.78125e-05	2.009	4.47072e-07	2.76	1.24111e-22	UP	Pan	Pan_UP
p2@ENST00000414386	4.407	6.93991e-07	9.604	5.03135e-30	2.519	2.07625e-16	UP	Pan	Pan_UP
p2@RTN4RL2	4.392	0.00638891	1.348	0.360816	2.183	1.03943e-06	UP	Solid only	Solid_UP
p1@RGL3	4.322	6.46159e-06	-1.776	0.199894	2.651	9.54933e-12	UP	Solid only	Solid_UP
p1@SRCIN1	4.322	8.64196e-06	3.551	9.09169e-06	4.549	3.67504e-39	UP	Pan	Pan_UP
p3@E2F8	4.318	4.06001e-09	4.091	1.67466e-25	2.314	5.03293e-16	UP	Pan	Pan_UP
p3@PEX10	4.31	0.00693461	7.604	3.10523e-08	2.588	3.70251e-07	UP	Pan	Pan_UP
p1@ENST00000503969	4.308	1.27735e-07	2.765	2.91439e-10	2.294	2.54465e-18	UP	Pan	Pan_UP
p10@TRIM44	4.303	0.00134527	-0.191	0.869568	2.24	3.75477e-10	UP	Solid only	Solid_UP
p2@DUSP9	4.293	0.0067121	4.832	0.000280071	2.353	0.000802864	UP	Pan	Pan_UP
p1@ADD2	4.281	3.88219e-07	1.679	0.00804157	4.054	9.18752e-21	UP	Solid only	Solid_UP
p2@RBM20	4.272	9.25745e-05	5.74	6.17725e-06	3.562	1.07227e-15	UP	Pan	Pan_UP
p2@EPHA5	4.248	6.05881e-05	7.965	0.00322354	3.073	1.42387e-11	UP	Pan	Pan_UP
p2@C1QL1	4.241	0.00314563	0.164	1	2.497	8.40261e-08	UP	Solid only	Solid_UP
p1@NMU	4.238	4.32164e-07	10.622	2.95573e-18	3.455	1.3254e-16	UP	Pan	Pan_UP
p1@CADM2	4.224	0.0001818	1.398	0.0889871	3.413	2.09501e-12	UP	Solid only	Solid_UP
p4@CDC5L	4.219	2.53532e-11	0.642	0.0933238	2.685	6.69232e-23	UP	Solid only	Solid_UP
p1@ENST00000506093	4.219	0.00392823	2.162	0.00620198	3.009	1.12589e-11	UP	Pan	Pan_UP
p3@MAPT	4.198	0.00450462	1.495	0.15626	5.331	1.18171e-17	UP	Solid only	Solid_UP
p3@CASC5	4.192	2.19747e-05	3.108	3.63864e-18	2.171	6.05188e-16	UP	Pan	Pan_UP
p1@GNG4	4.178	7.50504e-09	2.729	0.000199334	5.347	2.51409e-33	UP	Pan	Pan_UP
p3@ERBB3	4.176	0.000138898	1.021	0.659765	3.144	2.84196e-13	UP	Solid only	Solid_UP
p2@HIST2H2BE	4.17	0.000126269	2.543	1.67412e-09	2.236	9.6478e-15	UP	Pan	Pan_UP
p1@ISL2	4.161	2.18269e-07	2.951	2.94108e-09	2.678	4.05889e-15	UP	Pan	Pan_UP
p5@MED30	4.158	0.0016286	2.819	2.01529e-06	2.542	8.60929e-16	UP	Pan	Pan_UP
p2@SIM2	4.153	9.06745e-08	3.984	0.182246	2.226	1.90721e-08	UP	Solid only	Solid_UP
p2@ELP4	4.139	0.00218941	2.001	1.71924e-07	2.567	1.6703e-16	UP	Pan	Pan_UP
p3@MED30	4.135	4.77567e-06	1.788	0.000124241	2.959	3.70704e-24	UP	Solid only	Solid_UP
p1@ENST00000364127	4.131	1.04246e-10	5.516	3.52315e-22	2.605	3.86764e-20	UP	Pan	Pan_UP
p2@LHX6	4.123	7.22512e-05	6.005	5.70428e-08	4.371	4.04234e-29	UP	Pan	Pan_UP
p1@DCDC1	4.105	0.0013272	0.427	0.561627	2.96	1.21636e-19	UP	Solid only	Solid_UP
p2@ENST00000420694	4.103	4.93631e-08	2.554	1.07757e-06	2.178	5.86629e-11	UP	Pan	Pan_UP
p1@GCNT2	4.099	0.000135454	-0.105	0.99609	2.064	1.34084e-05	UP	Solid only	Solid_UP
p2@RGL3	4.068	0.00766566	-5.096	0.0846799	2.659	4.52736e-11	UP	Solid only	Solid_UP
p1@TMEM145	4.064	0.00041906	4.264	5.19583e-08	4.752	2.06694e-29	UP	Pan	Pan_UP
p3@RAP1GAP	4.044	8.93587e-06	8.097	2.22973e-07	5.422	6.2854e-40	UP	Pan	Pan_UP
p2@C19orf51	4.043	2.56794e-05	10.213	1.10658e-33	2.947	1.14731e-10	UP	Pan	Pan_UP
p1@ENST00000418758	4.04	0.00435414	1.4	0.0760003	2.098	5.39497e-06	UP	Solid only	Solid_UP
p4@ITGA2B	4.026	0.000291127	4.948	1.17149e-07	3.135	2.63966e-18	UP	Pan	Pan_UP
p2@NR6A1	3.989	5.96768e-09	0.595	0.387086	3.725	1.20481e-41	UP	Solid only	Solid_UP
p1@RHPN1	3.988	2.61132e-10	1.132	0.00305798	3.455	3.48454e-31	UP	Solid only	Solid_UP
p1@NUP210	3.985	7.36168e-11	0.947	1.40736e-08	2.812	4.64172e-10	UP	Solid only	Solid_UP
p3@EGR1	3.985	3.22945e-08	1.983	0.00142361	2.122	1.60932e-10	UP	Solid only	Solid_UP
p1@NEK10	3.985	0.00469753	1.016	0.329905	2.804	8.0892e-11	UP	Solid only	Solid_UP
p2@MCM2	3.978	0.000252585	3.479	2.91394e-15	2.981	3.9582e-31	UP	Pan	Pan_UP
p2@SUB1	3.959	2.67943e-06	1.674	0.000855907	2.041	8.66384e-09	UP	Solid only	Solid_UP
p4@TFAP2A	3.929	1.09181e-11	8.447	9.7171e-15	2.512	9.53453e-15	UP	Pan	Pan_UP
p3@PTPDC1	3.928	8.58375e-05	4.399	4.9972e-05	3.346	9.03101e-22	UP	Pan	Pan_UP
p10@MTUS1	3.916	0.000768932	-0.09	1	3.18	2.00601e-15	UP	Solid only	Solid_UP
p4@GCNT2	3.912	0.000195917	-0.669	0.123177	2.316	3.4868e-09	UP	Solid only	Solid_UP
p2@ENST00000439622	3.906	2.04036e-07	3.088	4.6335e-17	3.568	1.49952e-32	UP	Pan	Pan_UP
p1@HAP1	3.903	1.473e-05	-0.548	0.645832	3.932	9.72915e-30	UP	Solid only	Solid_UP
p2@PRSS16	3.901	0.00171985	1.244	0.0375599	2.247	4.52999e-07	UP	Solid only	Solid_UP
p1@RHOV	3.889	4.25734e-05	5.421	3.5353e-19	2.771	3.87115e-10	UP	Pan	Pan_UP
p5@IGF2BP3	3.884	2.20855e-05	5.649	2.86251e-20	2.137	2.61785e-16	UP	Pan	Pan_UP
p1@MMP13	3.873	0.00792761	1.794	0.452649	2.369	0.00331476	UP	Solid only	Solid_UP
p1@LOC286467	3.864	4.13143e-09	3.116	2.33959e-15	4.075	3.88839e-37	UP	Pan	Pan_UP
p9@MTUS1	3.856	0.000112186	-0.315	1	3.016	1.84812e-15	UP	Solid only	Solid_UP
p2@QTRT1	3.831	0.00810381	2.565	0.000141941	2.905	5.07656e-14	UP	Pan	Pan_UP
p6@CHN1	3.827	3.37484e-06	3.203	0.00208654	2.892	4.96058e-20	UP	Pan	Pan_UP
p4@SECISBP2L	3.823	0.000686238	2.259	1.64726e-05	2.351	5.81409e-18	UP	Pan	Pan_UP
p1@LOC643401	3.821	1.13626e-07	6.673	1.49467e-18	4.232	3.7469e-30	UP	Pan	Pan_UP
p6@SSX2IP	3.794	0.00576183	2.085	8.02308e-07	2.391	4.1964e-12	UP	Pan	Pan_UP
p1@NPPC	3.785	2.63564e-05	3.994	2.38586e-09	3.466	2.45469e-24	UP	Pan	Pan_UP
p5@FUNDC1	3.781	2.42117e-08	5.01	5.4021e-22	2.611	1.15634e-32	UP	Pan	Pan_UP
p1@PDE11A	3.772	0.00854122	8.377	1.54801e-05	3.435	2.60782e-12	UP	Pan	Pan_UP
p2@CCNO	3.763	0.000694811	3.558	0.0283975	2.768	4.4524e-15	UP	Solid only	Solid_UP
p2@KRT81	3.749	0.00983077	-0.565	0.832434	2.087	5.05945e-07	UP	Solid only	Solid_UP
p1@PARD6B	3.743	6.01688e-09	1.202	0.00543973	2.602	2.68811e-11	UP	Solid only	Solid_UP
p3@KIFC2	3.738	5.58853e-05	0.507	0.390317	2.116	8.20633e-13	UP	Solid only	Solid_UP
p2@WDR20	3.737	7.07417e-05	3.334	8.37491e-11	2.335	6.82722e-14	UP	Pan	Pan_UP
p3@RASEF	3.722	0.00264686	3.242	0.17601	3.619	5.56034e-18	UP	Solid only	Solid_UP
p3@ANKRD32	3.712	3.78725e-05	0.009	1	2.325	1.92404e-18	UP	Solid only	Solid_UP
p7@CLIP4	3.698	9.63506e-05	-3.149	9.47103e-05	2.175	6.26381e-09	UP	Solid only	Solid_UP
p3@PARD6B	3.695	7.99412e-06	0.358	0.52232	2.617	1.2768e-12	UP	Solid only	Solid_UP
p1@ENST00000365538	3.682	3.68761e-11	2.155	3.89819e-10	2.192	7.33647e-21	UP	Pan	Pan_UP
p1@DNAI1	3.666	0.00684852	4.858	1.08301e-05	3.584	3.28619e-26	UP	Pan	Pan_UP
p1@DLX2	3.662	1.1652e-11	3.631	1.62385e-14	3.048	6.60614e-40	UP	Pan	Pan_UP
p2@FAM184A	3.659	0.00035167	1.293	0.0927421	3.157	4.92358e-17	UP	Solid only	Solid_UP
p3@PPFIA3	3.655	2.90565e-09	6.786	3.68735e-45	3.535	6.81665e-37	UP	Pan	Pan_UP
p1@ONECUT2	3.65	1.00423e-08	7.874	3.88588e-23	6.289	1.57159e-76	UP	Pan	Pan_UP
p1@MKRN3	3.643	0.000344257	3.039	8.46622e-12	3.006	3.62427e-19	UP	Pan	Pan_UP
p1@PTCH2	3.623	7.08123e-05	2.395	0.00138791	2.371	6.44807e-13	UP	Pan	Pan_UP
p2@C9orf140	3.621	3.5585e-10	4.34	2.50869e-39	2.441	4.88042e-27	UP	Pan	Pan_UP
p3@NMU	3.589	0.00368073	7.62	2.35799e-08	2.875	8.85592e-12	UP	Pan	Pan_UP
p2@CEP152	3.584	3.36534e-08	2.504	3.30416e-30	2.517	5.33886e-27	UP	Pan	Pan_UP
p1@P2RX5	3.578	2.08903e-06	-0.342	0.515781	2.218	5.12404e-11	UP	Solid only	Solid_UP
p2@MTUS1	3.571	8.96768e-06	1.107	0.433858	3.15	1.14551e-10	UP	Solid only	Solid_UP
p7@ENST00000445581,p7@uc002kmi.2	3.555	0.00680025	3.844	0.0308057	2.489	1.16217e-10	UP	Solid only	Solid_UP
p2@MIR3187	3.543	0.00652155	8.496	4.62492e-19	2.43	5.74263e-09	UP	Pan	Pan_UP
p2@SLCO4A1	3.541	2.41484e-10	3.302	5.25378e-32	2.331	1.65282e-21	UP	Pan	Pan_UP
p1@ACBD7	3.535	4.14861e-10	3.616	2.68961e-16	2.476	1.90046e-24	UP	Pan	Pan_UP
p1@LOC647946	3.522	2.79745e-05	4.528	1.11378e-07	2.734	1.33497e-25	UP	Pan	Pan_UP
p1@C1QL1	3.498	1.10896e-06	2.234	0.0350863	2.824	2.56476e-20	UP	Solid only	Solid_UP
p1@BC043357	3.493	8.52746e-05	1.836	0.058097	3.031	2.60617e-17	UP	Solid only	Solid_UP
p1@EEF1A2	3.47	4.00079e-08	5.345	1.76473e-14	3.653	6.70806e-25	UP	Pan	Pan_UP
p1@ENST00000448869	3.464	7.28986e-13	4.986	1.20334e-17	3.83	3.82626e-46	UP	Pan	Pan_UP
p1@ARC	3.461	2.83016e-06	2.513	0.000123066	3.016	6.92807e-18	UP	Pan	Pan_UP
p2@FAM161A	3.456	4.65502e-05	2.587	3.46049e-06	2.623	4.6733e-22	UP	Pan	Pan_UP
p1@MECOM	3.454	0.00012535	3.423	0.0283624	2.072	3.08785e-08	UP	Solid only	Solid_UP
p1@C2orf70	3.447	0.00902724	1.857	0.259569	5.25	7.93605e-20	UP	Solid only	Solid_UP
p5@YTHDF2	3.446	0.0037788	3.033	1.11783e-07	4.005	5.10559e-30	UP	Pan	Pan_UP
p11@MTUS1	3.442	0.00196716	1.538	0.280602	3.314	5.02695e-16	UP	Solid only	Solid_UP
p4@MTUS1	3.438	0.000457761	2.531	0.027841	3.504	1.16843e-16	UP	Solid only	Solid_UP
p4@C8orf38	3.438	0.000942466	1.322	0.000838216	3.623	3.90714e-27	UP	Solid only	Solid_UP
p2@SMPDL3B	3.432	0.00201447	4.885	4.68277e-15	2.794	1.98097e-11	UP	Pan	Pan_UP
p4@C9orf82	3.416	1.61913e-05	2.128	6.75247e-10	2.029	4.37264e-18	UP	Pan	Pan_UP
p1@MCF2L-AS1	3.404	0.00320254	-2.474	0.000230934	3.586	1.1963e-14	UP	Solid only	Solid_UP
p5@PVT1	3.4	5.7422e-05	-0.441	0.519532	2.47	1.64563e-15	UP	Solid only	Solid_UP
p2@RHPN1	3.388	4.41986e-12	0.071	1	2.859	5.88771e-27	UP	Solid only	Solid_UP
p3@PRDX5	3.373	0.00121398	1.104	0.0285691	2.547	1.61447e-16	UP	Solid only	Solid_UP
p2@ENST00000501802	3.372	0.000424888	4.952	1.36482e-34	2.888	7.43864e-19	UP	Pan	Pan_UP
p3@ASNS	3.356	6.95827e-06	1.634	8.50674e-05	2.597	7.27331e-28	UP	Solid only	Solid_UP
p3@C8orf38	3.355	2.47418e-13	1.723	1.75284e-09	3.642	3.45678e-48	UP	Solid only	Solid_UP
p2@POLQ	3.354	0.005361	3.714	3.95429e-24	2.093	3.5967e-20	UP	Pan	Pan_UP
p2@CASP8	3.351	7.38421e-14	0.484	0.0110646	2.533	6.72589e-15	UP	Solid only	Solid_UP
p1@ENST00000443294,p1@uc001gyi.1,p1@uc001gyj.2	3.343	0.00637203	5.549	6.74622e-11	3.178	1.61102e-15	UP	Pan	Pan_UP
p2@PHKG2	3.341	0.00140647	4.185	9.84848e-14	3.651	1.27664e-29	UP	Pan	Pan_UP
p1@HOXA6	3.326	6.63824e-06	7.627	9.40874e-27	2.542	2.4018e-17	UP	Pan	Pan_UP
p2@TPD52	3.319	3.37096e-11	1.053	0.0329221	3.165	1.26094e-28	UP	Solid only	Solid_UP
p3@EEF1A2	3.314	3.42228e-08	8.068	1.22682e-14	4.154	7.94154e-23	UP	Pan	Pan_UP
p2@RNF157	3.305	0.00545111	0.294	0.816699	2.595	6.44776e-12	UP	Solid only	Solid_UP
p1@BRSK2	3.298	0.000873007	3.158	0.00116826	3.994	8.52655e-32	UP	Pan	Pan_UP
p1@ENST00000457670,p1@uc003ncv.1	3.297	0.00023191	2.07	0.0969858	2.064	4.18852e-15	UP	Solid only	Solid_UP
p8@RCC2	3.284	1.67264e-06	2.82	4.45431e-15	3.464	1.32638e-45	UP	Pan	Pan_UP
p3@MPP2	3.279	2.44773e-05	7.672	7.36341e-17	3.136	3.76277e-31	UP	Pan	Pan_UP
p3@SRCIN1	3.276	8.78043e-06	2.219	5.23587e-07	3.404	4.9301e-30	UP	Pan	Pan_UP
p2@RAPGEF5	3.273	2.28592e-06	4.278	6.23311e-07	3.128	5.30556e-19	UP	Pan	Pan_UP
p4@SLC25A13	3.266	1.66596e-07	1.11	0.000236897	2.489	7.93349e-23	UP	Solid only	Solid_UP
p1@C3orf15	3.264	0.00530559	-0.835	0.192682	2.307	1.4454e-09	UP	Solid only	Solid_UP
p7@PPFIA3	3.253	0.000250842	5.166	2.62769e-11	2.625	6.40941e-14	UP	Pan	Pan_UP
p3@RHPN1	3.238	1.47192e-06	0.033	1	2.696	1.54669e-22	UP	Solid only	Solid_UP
p3@TNNT1	3.238	5.87077e-05	5.939	1.98781e-13	3.994	6.62278e-26	UP	Pan	Pan_UP
p13@HSP90AA1	3.237	0.00389246	4.176	3.853e-12	2.307	4.68815e-18	UP	Pan	Pan_UP
p5@TEAD4	3.232	0.000769557	1.544	0.415233	2.282	1.78478e-15	UP	Solid only	Solid_UP
p3@ARHGEF26-AS1	3.224	0.00756992	7.092	5.04393e-06	2.153	5.12948e-06	UP	Pan	Pan_UP
p5@IVNS1ABP	3.221	0.0098085	-0.85	0.0424433	2.074	4.29368e-11	UP	Solid only	Solid_UP
p1@ENST00000442316	3.219	0.00214886	-0.115	1	2.238	3.10319e-07	UP	Solid only	Solid_UP
p1@PPFIA3	3.214	5.98233e-09	5.945	2.89769e-39	3.12	1.335e-34	UP	Pan	Pan_UP
p1@LOC100287482	3.208	2.24215e-07	0.081	1	2.48	1.01802e-23	UP	Solid only	Solid_UP
p1@RBPMS2	3.196	0.000123911	6.17	5.74893e-09	3.111	1.11673e-15	UP	Pan	Pan_UP
p4@SLC12A5	3.188	6.702e-07	2.437	7.20333e-08	2.542	1.43476e-20	UP	Pan	Pan_UP
p1@RASEF	3.188	0.000419965	4.508	0.0052454	4.916	6.79226e-35	UP	Pan	Pan_UP
p2@FBF1	3.185	0.00991868	1.281	0.111011	2.016	9.26808e-17	UP	Solid only	Solid_UP
p1@C8orf51	3.183	5.84716e-08	2.943	5.68319e-08	2.44	7.2404e-22	UP	Pan	Pan_UP
p3@PSIP1	3.17	0.000208093	1.263	2.11611e-06	2.414	1.03539e-25	UP	Solid only	Solid_UP
p3@VEPH1	3.167	0.00201102	7.308	0.0113312	3.992	5.81405e-17	UP	Solid only	Solid_UP
p5@RIC8B	3.164	0.00219062	2.02	0.0386446	2.852	6.11311e-15	UP	Solid only	Solid_UP
p1@NUP62CL	3.152	1.20918e-06	3.329	6.86888e-11	3.652	3.22725e-22	UP	Pan	Pan_UP
p4@LOC100130581	3.151	0.000220776	-0.726	0.267668	2.47	7.90076e-19	UP	Solid only	Solid_UP
p2@C19orf57	3.151	0.00105503	2.298	1.49531e-10	3.213	1.29612e-22	UP	Pan	Pan_UP
p1@MAST1	3.149	1.19584e-05	4.293	2.3542e-21	4.137	3.56252e-29	UP	Pan	Pan_UP
p2@ENST00000433644	3.149	0.000194053	5.959	1.01886e-09	2.785	7.86262e-23	UP	Pan	Pan_UP
p4@PUM2	3.131	2.59367e-05	3.225	6.86422e-25	2.053	5.3867e-17	UP	Pan	Pan_UP
p3@ENST00000501802	3.122	0.0061624	5.651	4.66632e-35	2.563	5.52148e-18	UP	Pan	Pan_UP
p2@ATAD2	3.103	2.00686e-13	1.967	2.29786e-21	2.527	7.19016e-53	UP	Solid only	Solid_UP
p3@TMPO	3.097	1.61913e-05	2.636	3.27923e-20	2.385	2.33002e-39	UP	Pan	Pan_UP
p1@ENST00000517773,p1@ENST00000519880,p1@ENST00000520512	3.096	0.00125899	-4.459	2.83775e-13	2.042	1.34499e-08	UP	Solid only	Solid_UP
p1@ENST00000414386	3.093	1.19487e-08	7.588	4.64356e-57	2.474	4.19063e-24	UP	Pan	Pan_UP
p1@ENST00000413145	3.072	0.00128461	5.905	9.93232e-11	3.544	2.10704e-17	UP	Pan	Pan_UP
p1@RCOR2	3.071	0.000332186	4.055	3.15784e-18	2.015	6.59064e-15	UP	Pan	Pan_UP
p2@EEF1A2	3.069	2.89447e-07	4.214	2.38355e-10	3.975	1.47936e-24	UP	Pan	Pan_UP
p1@ANKRD18A	3.054	1.44628e-05	3.053	3.80651e-05	3.284	2.32203e-22	UP	Pan	Pan_UP
p1@FAM184A	3.048	0.0010724	-0.896	0.198085	3.132	2.07431e-15	UP	Solid only	Solid_UP
p1@PPP1R9A	3.047	3.0912e-07	1.184	0.264035	3.24	2.23704e-20	UP	Solid only	Solid_UP
p2@CNNM3	3.036	7.30054e-06	1.589	6.43584e-09	2.379	1.38429e-27	UP	Solid only	Solid_UP
p1@CNNM1	3.033	0.000203668	1.682	0.0319667	2.469	2.59003e-12	UP	Solid only	Solid_UP
p2@NUP62CL	3.026	5.70798e-05	3.137	8.04858e-08	3.784	1.06545e-21	UP	Pan	Pan_UP
p4@CENPM	3.023	3.03924e-05	4.178	3.00261e-30	2.149	3.07352e-20	UP	Pan	Pan_UP
p1@PCDHB2	3.012	3.59273e-08	6.862	1.86033e-14	2.167	3.97504e-17	UP	Pan	Pan_UP
p1@RADIL	2.999	0.00113566	4.235	2.54182e-07	2.013	4.55599e-12	UP	Pan	Pan_UP
p2@AK2	2.997	6.59351e-05	-0.211	0.851119	2.074	1.5291e-15	UP	Solid only	Solid_UP
p3@CENPF	2.994	1.68056e-08	3.272	4.69838e-23	2.287	6.96853e-22	UP	Pan	Pan_UP
p2@BLM	2.982	0.00558655	2.222	9.7269e-14	2.406	5.61967e-19	UP	Pan	Pan_UP
p2@ENST00000453289	2.978	1.08881e-07	1.651	9.71742e-14	2.176	8.57032e-33	UP	Solid only	Solid_UP
p1@ADAM22	2.974	4.65012e-12	2.8	1.23641e-16	2.637	8.53723e-23	UP	Pan	Pan_UP
p2@FGFR4	2.957	2.18223e-05	7.117	2.06629e-21	2.111	5.92826e-11	UP	Pan	Pan_UP
p2@MCM8	2.952	6.16903e-08	2.899	5.05869e-28	2.204	3.45255e-28	UP	Pan	Pan_UP
p3@UPF3B	2.943	0.00154455	2.093	2.36159e-08	2.399	2.33632e-24	UP	Pan	Pan_UP
p2@RFC4	2.941	0.000483514	3.727	6.21229e-30	2.667	2.31086e-22	UP	Pan	Pan_UP
p3@PCDHB2	2.927	0.00157788	7.746	2.62501e-05	2.576	9.80248e-12	UP	Pan	Pan_UP
p5@SP4	2.926	2.63378e-06	1.253	1.72108e-05	2.042	5.60791e-16	UP	Solid only	Solid_UP
p1@ENST00000498979,p1@ENST00000500970,p1@uc001pwo.2,p1@uc001pwp.1	2.923	1.05787e-08	2.742	9.95331e-14	2.736	5.26138e-38	UP	Pan	Pan_UP
p3@CHN1	2.917	4.89834e-07	5.658	1.41386e-09	2.097	2.91688e-13	UP	Pan	Pan_UP
p2@PARD6B	2.908	6.20015e-09	0.13	0.864031	2.7	2.28812e-18	UP	Solid only	Solid_UP
p1@REEP1	2.906	0.00466108	2.99	0.00153033	3.649	5.00837e-20	UP	Pan	Pan_UP
p1@VWDE	2.897	0.00735643	3.212	3.13805e-06	3.647	1.22209e-23	UP	Pan	Pan_UP
p2@TOP2A	2.884	6.35114e-09	3.903	4.75877e-25	2.093	2.45903e-21	UP	Pan	Pan_UP
p1@RTKN2	2.875	1.28603e-06	4.341	2.68419e-14	2.819	3.41849e-27	UP	Pan	Pan_UP
p13@TNRC18	2.868	0.000985988	1.137	0.0228608	2.041	4.11375e-17	UP	Solid only	Solid_UP
p2@KIF14	2.867	1.74958e-08	3.802	3.03229e-33	2.159	1.63394e-21	UP	Pan	Pan_UP
p2@ZNRF2P1	2.864	1.00972e-07	3.726	6.49976e-13	2.505	1.65609e-35	UP	Pan	Pan_UP
p3@CLIP4	2.863	0.00093796	-6.588	5.00282e-11	2.399	1.91744e-09	UP	Solid only	Solid_UP
p3@MLF1IP	2.86	0.00188856	3.974	1.53675e-10	2.049	6.68331e-10	UP	Pan	Pan_UP
p6@USP48	2.848	0.00265675	2.537	9.46082e-08	2.603	3.92929e-17	UP	Pan	Pan_UP
p1@MAPT	2.842	3.75768e-06	2.216	9.58125e-05	4.396	3.15443e-32	UP	Pan	Pan_UP
p6@ZBTB44	2.838	0.0020345	1.996	1.28551e-11	2.319	2.95735e-21	UP	Solid only	Solid_UP
p4@CENPF	2.837	0.00718121	3.97	1.44189e-23	2.584	4.78112e-20	UP	Pan	Pan_UP
p7@ZNF331	2.834	0.000606378	3.45	2.34025e-12	2.538	2.41313e-16	UP	Pan	Pan_UP
p2@LOC100268168	2.832	0.00601241	1.144	0.0608941	2.046	2.26771e-13	UP	Solid only	Solid_UP
p5@USP48	2.83	1.35418e-05	2.31	2.87888e-10	2.816	2.43294e-28	UP	Pan	Pan_UP
p4@DNAH14	2.83	9.5807e-05	6.529	4.23137e-18	2.069	4.67931e-24	UP	Pan	Pan_UP
p3@RTKN2	2.828	0.00362418	1.733	0.00921262	2.233	1.66532e-12	UP	Solid only	Solid_UP
p14@JARID2	2.825	0.00355015	2.133	2.17907e-06	2.321	4.9177e-13	UP	Pan	Pan_UP
p1@FAM111B	2.823	8.75423e-06	1.926	0.00191212	2.601	1.20538e-25	UP	Solid only	Solid_UP
p1@CCDC150	2.815	8.28827e-08	4.008	6.75302e-49	3.035	2.39529e-62	UP	Pan	Pan_UP
p1@ENST00000332123,p1@ENST00000429940	2.811	5.72172e-05	10.971	9.71742e-14	2.146	1.32621e-11	UP	Pan	Pan_UP
p3@UHRF1BP1	2.811	0.00486901	1.133	0.0222916	2.099	9.5482e-14	UP	Solid only	Solid_UP
p2@GPR19	2.808	0.00739565	3.575	4.13447e-17	3.009	5.15138e-28	UP	Pan	Pan_UP
p1@FOXO6	2.778	0.00023031	-0.283	0.645285	2.508	9.40584e-11	UP	Solid only	Solid_UP
p1@EXO1	2.773	1.68915e-08	4.631	2.31381e-27	2.056	2.06063e-21	UP	Pan	Pan_UP
p1@RNF157	2.769	0.000350082	-0.025	1	2.231	1.35347e-12	UP	Solid only	Solid_UP
p3@EIF4G2	2.762	3.41012e-10	2.308	1.14404e-08	2.801	2.68949e-31	UP	Pan	Pan_UP
p2@MANEAL	2.761	1.04246e-10	2.739	1.04973e-19	3.858	3.17334e-64	UP	Pan	Pan_UP
p1@ACSM3	2.757	0.000850519	2.286	7.03781e-08	3.066	4.16247e-17	UP	Pan	Pan_UP
p2@CENPF	2.754	4.61438e-12	4.007	2.53111e-31	2.493	4.55509e-27	UP	Pan	Pan_UP
p2@SKA3	2.748	3.83116e-07	4.625	1.24277e-35	2.353	3.48328e-24	UP	Pan	Pan_UP
p3@HELLS	2.745	0.00132073	3.786	1.93871e-27	3.11	1.65609e-35	UP	Pan	Pan_UP
p1@RDM1	2.745	0.00376145	2.821	5.53908e-09	2.376	1.31453e-17	UP	Pan	Pan_UP
p3@FAM111B	2.724	0.00584609	2.542	6.44168e-06	2.209	7.57039e-17	UP	Pan	Pan_UP
p6@DNAH14	2.72	0.00231396	6.432	3.08021e-13	2.551	4.49454e-28	UP	Pan	Pan_UP
p2@BUB1B	2.696	2.26286e-05	4.754	1.75416e-45	2.144	1.52209e-21	UP	Pan	Pan_UP
p1@SDHAP3	2.695	1.9109e-06	0.541	0.267993	2.29	1.01834e-17	UP	Solid only	Solid_UP
p1@ZNF620	2.681	7.22899e-07	1.503	0.000398968	2.805	3.21597e-21	UP	Solid only	Solid_UP
p2@uc003xjb.2	2.679	0.00108489	3.349	1.96443e-18	2.278	3.45594e-16	UP	Pan	Pan_UP
p3@CPNE3	2.661	0.00228773	3.648	0.101157	2.088	7.17469e-15	UP	Solid only	Solid_UP
p1@ENST00000435649,p1@ENST00000443802,p1@uc001dnu.1	2.656	1.6848e-10	5.383	1.22722e-16	2.32	3.09178e-22	UP	Pan	Pan_UP
p2@PCDHB9	2.656	0.00298696	3.586	2.23779e-07	2.247	1.61746e-14	UP	Pan	Pan_UP
p6@BRCA1	2.651	0.00272311	4.662	2.88338e-43	2.147	2.17575e-20	UP	Pan	Pan_UP
p1@KIF26A	2.65	0.0081925	4.868	5.54912e-09	2.305	5.05421e-07	UP	Pan	Pan_UP
p2@EXO1	2.648	0.00416143	5.78	6.97231e-49	2.063	3.07205e-18	UP	Pan	Pan_UP
p1@DUSP9	2.633	1.04326e-05	7.547	2.36567e-11	2.37	1.21604e-08	UP	Pan	Pan_UP
p5@E2F3	2.627	0.00966211	4.648	6.28615e-42	2.002	1.21201e-17	UP	Pan	Pan_UP
p1@B4GALNT3	2.624	0.000848409	0.109	1	2.419	3.15886e-10	UP	Solid only	Solid_UP
p1@ENST00000500494,p1@uc002sjc.1	2.608	0.00677638	0.934	0.00410443	2.38	1.80741e-12	UP	Solid only	Solid_UP
p4@METTL21A	2.599	6.19089e-05	0.144	0.689144	2.134	4.16014e-25	UP	Solid only	Solid_UP
p1@MFI2-AS1	2.594	0.00190164	2.512	4.48094e-16	2.567	8.92031e-34	UP	Pan	Pan_UP
p5@MACROD1	2.593	0.000658022	4.392	3.63893e-10	2.033	6.30003e-15	UP	Pan	Pan_UP
p1@ENST00000558107	2.592	0.000226131	5.183	1.54117e-07	2.144	1.57295e-19	UP	Pan	Pan_UP
p1@CBX2	2.587	3.33654e-07	5.104	1.14335e-67	2.206	6.2223e-23	UP	Pan	Pan_UP
p1@PRTG	2.559	2.38826e-09	3.358	0.00811622	2.731	4.52744e-25	UP	Pan	Pan_UP
p1@RNU5F-1	2.546	2.48962e-07	2.875	4.90648e-17	2.69	1.51713e-28	UP	Pan	Pan_UP
p3@CMC1	2.529	0.000215198	2.817	7.61081e-22	2.098	1.39523e-19	UP	Pan	Pan_UP
p3@SMC1A	2.521	0.00020801	2.244	1.11285e-09	2.379	6.79669e-22	UP	Pan	Pan_UP
p1@C12orf34	2.515	2.19537e-14	0.947	0.0039119	2.34	5.96227e-24	UP	Solid only	Solid_UP
p2@RACGAP1	2.515	1.22805e-05	3.114	1.19984e-12	2.151	9.64472e-17	UP	Pan	Pan_UP
p1@SAMD12	2.508	3.13456e-05	0.213	0.816057	2.735	2.02903e-29	UP	Solid only	Solid_UP
p10@STAG2	2.508	0.000166847	2.223	1.41159e-14	2.272	1.87258e-20	UP	Pan	Pan_UP
p2@ZNF638	2.506	3.65476e-08	3.22	2.30081e-10	3.54	4.43931e-45	UP	Pan	Pan_UP
p2@XRCC2	2.486	1.82423e-05	5.212	4.17496e-48	2.647	9.32124e-33	UP	Pan	Pan_UP
p2@RTKN2	2.477	2.10717e-05	4.531	1.73713e-16	2.564	1.44062e-24	UP	Pan	Pan_UP
p1@MANEAL	2.463	1.202e-10	1.972	1.0953e-08	3.399	3.47117e-68	UP	Solid only	Solid_UP
p1@CENPF	2.459	4.38773e-12	4.026	2.49454e-44	2.419	1.17169e-28	UP	Pan	Pan_UP
p1@MED12L	2.459	0.000307265	3.787	1.95629e-10	3.69	1.91811e-31	UP	Pan	Pan_UP
p1@PCDHB11	2.452	0.000157578	4.77	0.000104721	2.949	5.08664e-17	UP	Pan	Pan_UP
p2@SPAG1	2.445	1.893e-07	1.981	2.3653e-05	2.545	1.45618e-20	UP	Solid only	Solid_UP
p1@SBK1	2.444	0.00065821	-1.59	0.00143497	2.989	1.74059e-13	UP	Solid only	Solid_UP
p2@RNFT2	2.423	2.13503e-06	2.132	3.75707e-07	2.267	1.23482e-21	UP	Pan	Pan_UP
p2@CBFA2T2	2.409	3.02689e-06	0.593	0.117969	2.538	2.10094e-28	UP	Solid only	Solid_UP
p7@KIAA1598	2.403	0.000575786	0.328	0.809027	3.376	1.23621e-26	UP	Solid only	Solid_UP
p1@DGCR5	2.395	0.0037706	-1.348	0.250532	2.621	2.07934e-13	UP	Solid only	Solid_UP
p1@KIAA1804	2.388	0.00834123	1.159	0.0085164	2.328	2.54917e-18	UP	Solid only	Solid_UP
p1@EPHA5	2.38	0.00194014	5.737	0.00674072	3.15	1.07696e-11	UP	Pan	Pan_UP
p1@CHRNA5	2.374	1.39747e-05	5.301	4.69261e-43	2.732	3.19999e-33	UP	Pan	Pan_UP
p3@RAVER2	2.35	2.63284e-07	2.325	2.00556e-10	2.053	1.87469e-29	UP	Pan	Pan_UP
p3@MTUS1	2.348	0.00056672	-0.603	0.72971	2.873	2.08338e-17	UP	Solid only	Solid_UP
p2@ZSWIM5	2.346	0.000913224	-1.121	0.0556476	2.14	2.86654e-19	UP	Solid only	Solid_UP
p2@KIF23	2.327	2.77624e-06	4.001	4.91169e-27	2.17	7.28039e-26	UP	Pan	Pan_UP
p3@DBF4	2.324	1.3387e-06	2.701	1.82097e-21	2.271	4.53597e-35	UP	Pan	Pan_UP
p2@ZNF714	2.324	0.0012942	2.398	3.5418e-15	2.283	1.25447e-26	UP	Pan	Pan_UP
p2@ENST00000445581,p2@uc002kmi.2	2.309	0.00189777	2.04	0.00250116	2.193	2.36139e-17	UP	Pan	Pan_UP
p1@RBM11	2.299	0.00986519	-2.541	5.31e-08	3.863	2.01106e-19	UP	Solid only	Solid_UP
p1@CCNO	2.298	0.00023031	4.316	2.9528e-09	2.279	1.0382e-22	UP	Pan	Pan_UP
p6@ATXN2L	2.29	0.000232475	3.177	5.59528e-23	2.187	2.95151e-25	UP	Pan	Pan_UP
p1@SPATA17	2.276	1.19584e-05	0.716	0.0912777	2.145	2.28019e-29	UP	Solid only	Solid_UP
p1@RNFT2	2.273	1.11544e-05	2.005	6.78062e-07	2.068	4.04771e-24	UP	Pan	Pan_UP
p2@CLSPN	2.264	0.00146051	3.67	1.01307e-32	2.039	4.57252e-19	UP	Pan	Pan_UP
p1@BUB1B	2.263	3.5585e-10	4.668	5.03117e-34	2.026	1.63828e-23	UP	Pan	Pan_UP
p2@SGOL1	2.258	1.52812e-05	3.947	3.7512e-41	2.326	6.76486e-29	UP	Pan	Pan_UP
p2@ENST00000376334	2.258	0.00167238	0.622	0.374504	2.109	1.70716e-12	UP	Solid only	Solid_UP
p1@ENST00000530333,p1@ENST00000534704	2.249	0.00357818	4.072	1.81644e-50	2.514	2.8462e-24	UP	Pan	Pan_UP
p1@MYEF2	2.248	3.15865e-09	1.125	0.00637731	2.118	9.56563e-21	UP	Solid only	Solid_UP
p3@C5orf34	2.246	0.000379014	2.789	6.57836e-19	2.391	1.17687e-30	UP	Pan	Pan_UP
p8@SMC4	2.237	0.000315828	3.513	5.75417e-29	2.016	8.66814e-21	UP	Pan	Pan_UP
p1@TPD52	2.232	1.6695e-10	0.876	0.0248885	2.418	1.16942e-15	UP	Solid only	Solid_UP
p1@MCOLN3	2.217	8.47741e-05	-1.781	0.04133	2.625	1.45853e-18	UP	Solid only	Solid_UP
p1@KIAA0182	2.212	4.63824e-07	1.373	1.46408e-08	2.328	2.93448e-24	UP	Solid only	Solid_UP
p1@KRT80	2.204	0.00139622	7.718	7.27464e-06	2.656	8.26337e-10	UP	Pan	Pan_UP
p3@ZNF473	2.203	0.000480228	2.495	1.48842e-11	2.141	1.05592e-22	UP	Pan	Pan_UP
p1@ATAD5	2.199	1.31612e-12	2.852	2.39099e-47	2.326	9.01905e-35	UP	Pan	Pan_UP
p1@GAD1	2.193	0.0077917	5.464	7.35791e-19	3.453	4.25694e-31	UP	Pan	Pan_UP
p4@MZT1	2.184	0.00385805	2.873	1.23477e-10	2.111	2.67703e-15	UP	Pan	Pan_UP
p1@SLCO4A1	2.179	1.34415e-05	2.212	1.44218e-11	2.437	5.78915e-15	UP	Pan	Pan_UP
p5@DBNDD2	2.179	0.00120935	-0.529	0.23863	2.154	2.32327e-23	UP	Solid only	Solid_UP
p1@MNS1	2.174	4.13178e-09	4.969	1.34146e-29	2.449	5.38761e-27	UP	Pan	Pan_UP
p2@ENST00000473753	2.172	0.00293926	0.175	0.789822	2.598	2.36819e-22	UP	Solid only	Solid_UP
p5@MET	2.168	0.00279996	3.238	0.0262776	2.242	2.12921e-12	UP	Solid only	Solid_UP
p1@HOOK1	2.163	0.00449118	-1.235	0.0653451	3.39	4.10952e-15	UP	Solid only	Solid_UP
p3@BSG	2.155	0.00354738	3.372	4.38866e-23	3.069	1.89776e-26	UP	Pan	Pan_UP
p2@TMPO	2.153	0.000128486	2.119	8.19493e-16	2.132	1.88855e-32	UP	Pan	Pan_UP
p5@CCDC14	2.151	0.000535209	3.34	4.54373e-11	2.023	5.59861e-23	UP	Pan	Pan_UP
p1@RAD54L	2.14	3.51587e-09	4.753	7.95509e-30	2.125	8.98627e-25	UP	Pan	Pan_UP
p3@PABPC1L	2.135	0.00104375	3.063	8.68048e-12	3.198	3.82339e-37	UP	Pan	Pan_UP
p3@MKI67	2.127	0.00352553	3.512	4.91742e-18	2.017	1.72295e-14	UP	Pan	Pan_UP
p2@PM20D2	2.115	0.000104027	3.98	5.70017e-30	2.112	3.03054e-21	UP	Pan	Pan_UP
p1@PVT1	2.113	5.67568e-11	0.993	4.23572e-05	3.691	1.57159e-76	UP	Solid only	Solid_UP
p3@PRKAR1B	2.095	1.70382e-05	2.702	4.02873e-19	2.131	1.0683e-22	UP	Pan	Pan_UP
p2@MAPT	2.092	0.000476799	2.84	3.59451e-07	3.109	9.56526e-29	UP	Pan	Pan_UP
p1@BAIAP3	2.072	0.00494104	-3.006	3.54244e-08	2.434	8.9004e-12	UP	Solid only	Solid_UP
p1@B4GALNT1	2.07	4.51713e-08	6.361	1.80156e-22	2.709	9.41624e-28	UP	Pan	Pan_UP
p4@ZNF331	2.064	1.73205e-05	1.499	7.46715e-07	2.234	1.04938e-23	UP	Solid only	Solid_UP
p1@FAM81A	2.056	3.78883e-05	2.726	3.66045e-06	4.462	4.58866e-66	UP	Pan	Pan_UP
p5@CCDC77	2.05	0.00266462	2.551	1.9811e-16	2.26	3.49958e-27	UP	Pan	Pan_UP
p3@RAB11FIP4	2.049	3.94011e-05	-0.618	0.0377214	2.035	1.62901e-07	UP	Solid only	Solid_UP
p1@KIF5C	2.045	0.00825759	-2.054	0.000276858	3.953	4.2727e-18	UP	Solid only	Solid_UP
p1@RTN4RL2	2.042	6.45811e-05	2.104	0.000339443	2.104	1.31789e-17	UP	Pan	Pan_UP
p1@TET1	2.038	6.1698e-06	6.649	6.53922e-17	3.191	2.89312e-27	UP	Pan	Pan_UP
p3@TERC	2.021	2.54066e-05	3.367	1.37577e-22	3.542	3.93154e-52	UP	Pan	Pan_UP
p1@ATAD2	2.017	1.03027e-12	2.32	7.9398e-40	2.298	1.76842e-46	UP	Pan	Pan_UP
p3@SORBS3	-2.037	0.00286159	-6.802	2.31628e-19	-2.702	2.6296e-10	DOWN	Pan	Pan_DOWN
p1@ITGA5	-2.04	1.65722e-06	-0.317	0.558574	-2.162	2.59499e-18	DOWN	Solid only	Solid_DOWN
p4@NNMT	-2.056	0.00953149	3.267	0.173192	-2.05	6.71601e-08	DOWN	Solid only	Solid_DOWN
p1@HTRA1	-2.06	5.32699e-05	-5.206	0.00026731	-2.549	3.10483e-15	DOWN	Pan	Pan_DOWN
p3@MYL6	-2.062	0.00980926	-0.77	0.196612	-2.684	7.75069e-15	DOWN	Solid only	Solid_DOWN
p2@HSPG2	-2.07	0.00679593	1.554	0.204998	-2.128	3.09959e-11	DOWN	Solid only	Solid_DOWN
p25@FN1	-2.089	0.00073594	-3.65	0.111993	-2.229	7.49338e-08	DOWN	Solid only	Solid_DOWN
p1@FBLIM1	-2.101	1.78622e-07	0.162	1	-2.079	1.11905e-15	DOWN	Solid only	Solid_DOWN
p1@FAM212A	-2.102	0.000529901	2.267	1.17756e-07	-2.066	3.1563e-14	DOWN	Solid only	Solid_DOWN
p3@SIRPA	-2.125	0.00226583	0.204	0.933753	-2.101	1.38159e-12	DOWN	Solid only	Solid_DOWN
p1@ENST00000485443	-2.161	2.32148e-09	-1.036	0.000101966	-2.06	7.36166e-21	DOWN	Solid only	Solid_DOWN
p1@SRPX	-2.233	3.05007e-05	1.166	0.268972	-2.714	1.62933e-15	DOWN	Solid only	Solid_DOWN
p12@ZYX	-2.237	0.000152748	-1.657	0.000277763	-2.63	9.05504e-23	DOWN	Solid only	Solid_DOWN
p1@TWIST2	-2.237	0.00558463	2.121	0.0703389	-2.338	1.68449e-10	DOWN	Solid only	Solid_DOWN
p3@SERPING1	-2.265	0.0018189	-0.441	0.858817	-2.587	1.27303e-09	DOWN	Solid only	Solid_DOWN
p4@TIMP3	-2.281	0.0034822	0.669	0.819438	-2.565	4.9375e-11	DOWN	Solid only	Solid_DOWN
p2@LTBP2	-2.29	0.000107124	-1.631	0.0326206	-2.377	3.80098e-17	DOWN	Solid only	Solid_DOWN
p4@SERPING1	-2.293	0.00241846	0.655	0.669355	-3.051	2.40917e-11	DOWN	Solid only	Solid_DOWN
p1@CDC42EP5	-2.299	1.70448e-05	2.002	0.0140326	-2.573	2.58308e-20	DOWN	Solid only	Solid_DOWN
p2@TIMP3	-2.317	0.00413327	0.069	1	-2.852	9.38307e-12	DOWN	Solid only	Solid_DOWN
p5@ENST00000456355	-2.325	0.00523669	-1.186	0.0123301	-2.078	1.68385e-12	DOWN	Solid only	Solid_DOWN
p8@TIMP3	-2.358	0.00329787	1.226	0.532446	-2.891	2.33212e-11	DOWN	Solid only	Solid_DOWN
p3@TMEM219	-2.394	0.0033156	-0.415	0.672551	-2.369	9.71486e-20	DOWN	Solid only	Solid_DOWN
p3@ITGA5	-2.408	8.6533e-07	-0.733	0.065552	-2.569	1.09666e-24	DOWN	Solid only	Solid_DOWN
p6@PRR14	-2.42	0.00881025	-2.415	1.24863e-15	-2.126	7.79298e-12	DOWN	Pan	Pan_DOWN
p1@C13orf15	-2.424	0.00132564	-4.296	5.32701e-20	-2.997	3.91821e-15	DOWN	Pan	Pan_DOWN
p6@TIMP1	-2.467	0.00335912	-1.086	0.0556606	-2.246	6.1036e-10	DOWN	Solid only	Solid_DOWN
p1@G0S2	-2.504	0.00663776	-4.04	2.74334e-05	-2.184	8.3543e-07	DOWN	Pan	Pan_DOWN
p1@AK126525	-2.508	0.00458274	-1.527	0.371523	-2.17	5.7091e-11	DOWN	Solid only	Solid_DOWN
p5@SPARC	-2.514	0.00452573	-0.709	0.650904	-2.248	2.72518e-11	DOWN	Solid only	Solid_DOWN
p10@FADS2	-2.525	0.000134213	2.572	4.40822e-05	-2.269	6.25054e-16	DOWN	Solid only	Solid_DOWN
p16@ZYX	-2.541	2.27904e-05	-1.382	0.0050599	-2.09	2.28457e-17	DOWN	Solid only	Solid_DOWN
p4@C1QTNF1	-2.557	0.00359006	-2.268	0.390317	-3.208	2.14578e-14	DOWN	Solid only	Solid_DOWN
p5@C1QTNF1	-2.561	0.000200443	2.384	0.371523	-2.679	5.2273e-14	DOWN	Solid only	Solid_DOWN
p1@EFEMP2	-2.565	0.000497457	2.012	0.102735	-2.059	1.67075e-08	DOWN	Solid only	Solid_DOWN
p1@FTH1P22	-2.583	0.00199527	-3.585	0.000189842	-2.169	2.86792e-09	DOWN	Pan	Pan_DOWN
p1@C1QTNF1	-2.665	2.01132e-05	-0.846	0.612502	-2.508	2.70307e-14	DOWN	Solid only	Solid_DOWN
p3@ADPRH	-2.692	0.00149198	-1.108	0.0549688	-2.019	2.52646e-08	DOWN	Solid only	Solid_DOWN
p1@TLR2	-2.695	0.00184469	-2.851	7.93469e-06	-2.14	1.98401e-05	DOWN	Pan	Pan_DOWN
p5@ITGA5	-2.699	0.000301007	-0.805	0.169188	-2.558	1.19184e-18	DOWN	Solid only	Solid_DOWN
p2@SERPINE2	-2.781	0.00192328	0.975	0.508029	-2.336	1.99815e-07	DOWN	Solid only	Solid_DOWN
p2@DCTN1	-2.787	0.000104063	2.16	0.00662173	-2.039	2.2415e-08	DOWN	Solid only	Solid_DOWN
p1@OSR1	-2.803	0.00984598	-1.278	0.712989	-2.24	1.99515e-08	DOWN	Solid only	Solid_DOWN
p32@FN1	-2.858	0.000455128	-0.736	0.830939	-2.054	9.65265e-07	DOWN	Solid only	Solid_DOWN
p4@TCN2	-2.858	0.00643003	-1.142	0.177528	-2.033	2.17383e-07	DOWN	Solid only	Solid_DOWN
p4@HTRA1	-2.859	2.19776e-07	-4.923	0.0232528	-2.94	7.72118e-17	DOWN	Solid only	Solid_DOWN
p3@COL1A1	-2.889	0.00109903	1.064	0.433974	-2.717	1.7369e-08	DOWN	Solid only	Solid_DOWN
p20@FN1	-2.892	6.61284e-05	-0.943	0.852778	-2.174	1.73981e-07	DOWN	Solid only	Solid_DOWN
p8@SERPING1	-2.894	0.00187232	1.233	0.479799	-3.126	2.28894e-11	DOWN	Solid only	Solid_DOWN
p1@MMP2	-2.903	0.000525236	1.909	0.0746491	-2.085	6.78579e-08	DOWN	Solid only	Solid_DOWN
p2@KSR1	-2.904	0.00605627	0.658	0.789846	-2.097	7.51336e-09	DOWN	Solid only	Solid_DOWN
p1@ADPRH	-2.921	3.84938e-07	-0.516	0.315995	-2.084	1.46439e-11	DOWN	Solid only	Solid_DOWN
p3@TGFB1I1	-2.937	2.53646e-05	5.997	0.00142345	-2.444	1.77872e-20	DOWN	Solid only	Solid_DOWN
p2@FAM212A	-2.972	0.000138001	1.963	1.12183e-06	-2.235	1.09735e-17	DOWN	Solid only	Solid_DOWN
p29@FN1	-2.974	4.65245e-05	-3.085	0.210154	-2.451	6.1216e-10	DOWN	Solid only	Solid_DOWN
p3@MIR198	-2.979	0.00860766	0.902	0.746073	-2.069	4.27043e-08	DOWN	Solid only	Solid_DOWN
p17@FN1	-2.99	4.36388e-05	0.005	1	-2.143	1.7135e-07	DOWN	Solid only	Solid_DOWN
p1@MAF	-3.009	0.000102564	-1.162	0.137778	-2.033	1.75582e-08	DOWN	Solid only	Solid_DOWN
p1@TREM1	-3.038	0.00723238	-6.871	2.60941e-13	-3.278	6.19334e-08	DOWN	Pan	Pan_DOWN
p12@LRP10	-3.075	2.16431e-06	-3.323	4.16737e-07	-2.031	1.30986e-11	DOWN	Pan	Pan_DOWN
p2@PLEKHG5	-3.09	0.00178037	2.067	0.572757	-2.105	9.32893e-05	DOWN	Solid only	Solid_DOWN
p1@BGN	-3.112	0.000119704	-2.047	0.284488	-2.247	6.47879e-07	DOWN	Solid only	Solid_DOWN
p1@NID2	-3.128	6.0547e-05	0.887	0.549752	-2.129	7.83869e-08	DOWN	Solid only	Solid_DOWN
p7@HTRA1	-3.129	0.000219055	-3.086	0.210004	-2.535	1.95762e-08	DOWN	Solid only	Solid_DOWN
p2@C10orf140	-3.129	0.00108739	-0.301	0.728834	-2.1	2.79484e-10	DOWN	Solid only	Solid_DOWN
p16@COL1A1	-3.158	0.0073887	-1.063	0.752777	-2.273	7.97237e-07	DOWN	Solid only	Solid_DOWN
p24@FN1	-3.165	5.05621e-05	-3.961	0.0695241	-2.198	2.30597e-07	DOWN	Solid only	Solid_DOWN
p3@PIK3IP1	-3.172	0.00374748	-6.705	2.20953e-34	-2.44	1.16668e-08	DOWN	Pan	Pan_DOWN
p5@MFGE8	-3.179	0.000161721	1.117	0.243907	-2.094	1.10987e-07	DOWN	Solid only	Solid_DOWN
p2@DYSF	-3.192	6.1923e-05	-2.049	0.0192001	-2.371	2.88565e-08	DOWN	Solid only	Solid_DOWN
p1@ENST00000535743	-3.197	0.009021	-1.283	0.423765	-2.015	3.6356e-10	DOWN	Solid only	Solid_DOWN
p2@APOD	-3.237	0.00465209	3.882	0.000732107	-2.151	3.72537e-05	DOWN	Solid only	Solid_DOWN
p7@COL1A1	-3.241	0.00285715	-1.291	0.616249	-2.903	5.66194e-09	DOWN	Solid only	Solid_DOWN
p2@NID2	-3.257	0.00019875	-2.258	0.390317	-2.631	1.82962e-11	DOWN	Solid only	Solid_DOWN
p5@SERPINE1	-3.266	0.000474801	-0.428	0.943302	-2.042	8.06058e-08	DOWN	Solid only	Solid_DOWN
p64@FN1	-3.288	0.00266889	0	1	-2.087	9.98449e-06	DOWN	Solid only	Solid_DOWN
p2@CU691369	-3.289	0.000200443	0.564	0.838606	-3.567	6.1725e-11	DOWN	Solid only	Solid_DOWN
p6@SERPING1	-3.313	2.46634e-05	0.231	1	-2.378	3.58293e-08	DOWN	Solid only	Solid_DOWN
p1@AB590791	-3.339	9.22011e-07	-0.803	0.802935	-2.863	4.42482e-12	DOWN	Solid only	Solid_DOWN
p1@CU677000	-3.354	1.60388e-05	6.922	1.90519e-05	-2.451	5.21167e-18	DOWN	Solid only	Solid_DOWN
p8@COL1A1	-3.387	0.00108533	-1.785	0.638001	-2.431	3.02147e-07	DOWN	Solid only	Solid_DOWN
p26@COL1A1	-3.394	0.00665656	0.823	0.781119	-2.377	7.24335e-07	DOWN	Solid only	Solid_DOWN
p2@SH3D19	-3.414	0.000536555	-2.258	0.390317	-2.51	8.60989e-12	DOWN	Solid only	Solid_DOWN
p3@AOX1	-3.441	0.00432695	-2.294	0.390317	-2.379	7.17987e-07	DOWN	Solid only	Solid_DOWN
p1@SERPINF1	-3.457	0.00197432	7.18	2.92647e-16	-2.339	9.24727e-08	DOWN	Solid only	Solid_DOWN
p1@CD4	-3.463	0.00651418	-1.999	5.46545e-05	-5.12	3.03927e-14	DOWN	Solid only	Solid_DOWN
p1@POU2F2	-3.537	0.00069979	0.051	1	-2.022	6.84097e-07	DOWN	Solid only	Solid_DOWN
p4@SBNO2	-3.54	0.000117068	-0.814	0.103786	-2.05	3.65719e-15	DOWN	Solid only	Solid_DOWN
p14@FN1	-3.543	2.33054e-07	-2.48	0.219484	-2.276	4.07451e-08	DOWN	Solid only	Solid_DOWN
p1@ACOX2	-3.57	0.00175676	3.965	0.0185699	-2.056	6.77602e-09	DOWN	Solid only	Solid_DOWN
p4@SLIT3	-3.572	5.29407e-05	2.413	0.371523	-2.083	8.1305e-08	DOWN	Solid only	Solid_DOWN
p1@DCN	-3.681	0.0032044	-2.463	0.177257	-2.988	2.45241e-08	DOWN	Solid only	Solid_DOWN
p2@NHSL1	-3.683	0.00978542	0.094	1	-2.738	1.11307e-10	DOWN	Solid only	Solid_DOWN
p51@FN1	-3.724	3.17606e-06	-2.298	0.390317	-2.387	2.87383e-09	DOWN	Solid only	Solid_DOWN
p1@FABP4	-3.746	0.00788113	-9.922	5.00909e-06	-5.564	1.42316e-11	DOWN	Pan	Pan_DOWN
p1@HIC1	-3.758	8.44078e-08	0.224	0.804808	-2.211	1.48811e-14	DOWN	Solid only	Solid_DOWN
p10@SERPING1	-3.767	4.0638e-05	0.843	0.651357	-2.926	5.73555e-09	DOWN	Solid only	Solid_DOWN
p1@TNFRSF6B	-3.806	0.00432152	3.052	0.0183349	-2.514	3.76446e-07	DOWN	Solid only	Solid_DOWN
p1@VCAM1	-3.812	0.00352014	2.317	0.0142947	-2.279	3.73894e-05	DOWN	Solid only	Solid_DOWN
p3@TNFAIP8L3	-3.849	1.70707e-05	-0.007	1	-2.019	8.40622e-08	DOWN	Solid only	Solid_DOWN
p1@CU691369	-3.859	0.000166049	0.31	1	-3	3.13697e-09	DOWN	Solid only	Solid_DOWN
p1@SERPING1	-3.861	4.03302e-07	0.306	0.913214	-2.678	1.85202e-09	DOWN	Solid only	Solid_DOWN
p1@S1PR1	-3.874	0.000111316	-2.677	1.30627e-06	-2.025	1.39404e-06	DOWN	Pan	Pan_DOWN
p1@GJB2	-4.024	0.000148861	-1.025	0.381062	-3.538	4.83966e-06	DOWN	Solid only	Solid_DOWN
p2@COL1A1	-4.039	8.14252e-05	2.981	0.0758549	-2.737	1.22548e-08	DOWN	Solid only	Solid_DOWN
p5@SERPING1	-4.05	4.4971e-05	0.371	0.961456	-2.88	7.25816e-11	DOWN	Solid only	Solid_DOWN
p2@IGF2	-4.061	0.000352434	-7.681	0.00118091	-2.206	0.000128695	DOWN	Pan	Pan_DOWN
p1@SULT1E1	-4.099	0.00523327	4.553	0.0309354	-4.336	4.87797e-10	DOWN	Solid only	Solid_DOWN
p5@IL4R	-4.12	9.38586e-06	-1.272	0.0394492	-2.056	8.14987e-11	DOWN	Solid only	Solid_DOWN
p1@COL3A1	-4.205	0.00222107	-8.727	3.08411e-06	-2.47	5.00228e-06	DOWN	Pan	Pan_DOWN
p3@AKNA	-4.209	0.000327525	-1.844	7.04568e-14	-3.525	1.93238e-15	DOWN	Solid only	Solid_DOWN
p4@TRIM22	-4.218	7.9883e-05	-0.675	0.0594508	-2.4	1.73844e-11	DOWN	Solid only	Solid_DOWN
p5@RNH1	-4.22	1.06286e-09	-0.198	0.970938	-2.669	9.28072e-19	DOWN	Solid only	Solid_DOWN
p5@ENG	-4.251	0.000773201	1.103	0.371523	-3.739	6.96214e-17	DOWN	Solid only	Solid_DOWN
p1@ALOX5AP	-4.273	0.00125752	-0.902	0.0170123	-2.806	1.66983e-05	DOWN	Solid only	Solid_DOWN
p4@PDGFRB	-4.344	0.000380016	0.668	0.8688	-3.064	1.21175e-09	DOWN	Solid only	Solid_DOWN
p1@MMP9	-4.346	0.00060928	-8.105	1.54899e-09	-4.848	1.35469e-11	DOWN	Pan	Pan_DOWN
p10@TGM2	-4.362	0.00169253	-1.911	0.22706	-2.244	1.82507e-08	DOWN	Solid only	Solid_DOWN
p6@SERPINE1	-4.37	6.46442e-06	-0.004	1	-2.51	1.26047e-12	DOWN	Solid only	Solid_DOWN
p11@COL1A1	-4.423	3.90914e-05	-1.391	0.594953	-2.247	1.41442e-06	DOWN	Solid only	Solid_DOWN
p5@RFNG	-4.437	0.0060458	-1.515	0.102178	-2.219	3.88336e-06	DOWN	Solid only	Solid_DOWN
p2@SPON2	-4.689	7.88916e-05	-10.913	7.04485e-15	-5.468	4.99579e-23	DOWN	Pan	Pan_DOWN
p1@PHYHIP	-4.727	0.000303055	1.19	0.434375	-2.237	0.000185942	DOWN	Solid only	Solid_DOWN
p1@MXRA8	-4.753	0.000368084	2.79	0.00331736	-2.496	2.19435e-08	DOWN	Solid only	Solid_DOWN
p1@COL16A1	-4.764	1.39074e-06	1.505	0.699426	-2.21	9.57878e-08	DOWN	Solid only	Solid_DOWN
p1@SH3D19	-4.767	4.03381e-07	0.146	1	-3.607	7.68077e-23	DOWN	Solid only	Solid_DOWN
p2@FBLN5	-4.791	3.66536e-06	-1.225	0.555729	-3.08	1.12548e-08	DOWN	Solid only	Solid_DOWN
p1@COL6A3	-4.871	0.00165972	3.229	0.0304579	-2.259	1.86093e-05	DOWN	Solid only	Solid_DOWN
p2@COL6A3	-4.905	0.00173344	-0.019	1	-2.289	1.95973e-05	DOWN	Solid only	Solid_DOWN
p13@RUSC2	-4.947	0.000388265	-3.653	0.111656	-2.808	1.24233e-09	DOWN	Solid only	Solid_DOWN
p1@CXCL6	-5.074	9.76582e-07	-5.479	0.00961051	-6.185	3.19144e-16	DOWN	Pan	Pan_DOWN
p2@COL16A1	-5.13	7.6015e-07	5.221	0.206532	-2.195	4.66744e-07	DOWN	Solid only	Solid_DOWN
p2@DCN	-5.133	0.000603923	-5.738	0.065775	-3.41	2.56427e-08	DOWN	Solid only	Solid_DOWN
p1@CD248	-5.237	9.12037e-05	-1.815	0.0761987	-3.072	3.75173e-10	DOWN	Solid only	Solid_DOWN
p24@COL1A1	-5.428	4.8228e-06	0.827	0.779251	-3.171	6.0249e-11	DOWN	Solid only	Solid_DOWN
p2@PAMR1	-5.562	6.85489e-07	0	1	-3.218	4.60527e-13	DOWN	Solid only	Solid_DOWN
p1@AOX1	-5.609	2.04396e-08	-0.875	0.597765	-3.752	1.04558e-15	DOWN	Solid only	Solid_DOWN
p2@MGAT1	-5.766	5.45077e-11	-2.051	1.53627e-17	-2.336	5.22699e-09	DOWN	Pan	Pan_DOWN
p1@PAMR1	-5.771	8.59311e-07	-3.145	0.203057	-3.202	1.21201e-11	DOWN	Solid only	Solid_DOWN
p1@C1QTNF5	-5.849	5.2997e-09	0	1	-3.469	1.61746e-14	DOWN	Solid only	Solid_DOWN
p9@FURIN	-5.869	3.87707e-06	0.734	0.610806	-2.279	4.23176e-06	DOWN	Solid only	Solid_DOWN
p2@CTSK	-5.903	6.87463e-09	-5.316	0.00144935	-2.047	1.60266e-05	DOWN	Pan	Pan_DOWN
p1@SPON2	-6.013	1.41292e-08	-10.18	1.26563e-20	-4.962	1.13676e-18	DOWN	Pan	Pan_DOWN
p3@FEZ1	-6.479	3.09132e-08	2.07	0.222782	-2.313	5.97508e-10	DOWN	Solid only	Solid_DOWN
p1@ELTD1	-6.643	1.08039e-05	-2.316	0.390317	-2.684	8.27513e-07	DOWN	Solid only	Solid_DOWN
p1@CDH5	-6.962	4.30091e-05	2.935	0.0282498	-8.155	1.71144e-17	DOWN	Solid only	Solid_DOWN
p@chr6:120326861..120326878,+	9.42	9.67e-12	5.94	4.6e-11	6.1	2.56e-28	UP	Pan	Pan_UP
p@chr3:129089385..129089423,-	7.62	1.03e-08	-0.79	0.0728	2.03	1.44e-08	UP	Solid only	Solid_UP
p@chr19:18379063..18379075,-	7.34	6.16e-11	-0.52	0.459	2.1	1.52e-09	UP	Solid only	Solid_UP
p@chr8:101700653..101700657,-	7.33	8.87e-13	1.51	0.000513	2.55	5.01e-21	UP	Solid only	Solid_UP
p@chr1:240926680..240926686,+	7.19	2.61e-06	4.12	0.0498	5.08	8.9e-17	UP	Solid only	Solid_UP
p@chr11:44322858..44322865,+	6.93	6.18e-06	3.75	0.107	2.59	1.44e-06	UP	Solid only	Solid_UP
p@chr19:6533086..6533102,+	6.91	2.28e-06	3.21	2.54e-08	2.26	2.92e-08	UP	Pan	Pan_UP
p@chr19:48902342..48902355,+	6.68	2.97e-05	5.44	1.9e-12	3.88	2.85e-23	UP	Pan	Pan_UP
p@chr1:46056374..46056378,+	6.51	4.42e-12	0.58	0.145	2.28	3.15e-15	UP	Solid only	Solid_UP
p@chr8:224162..224167,-	6.51	3e-08	4.99	1.16e-09	3.74	2.02e-25	UP	Pan	Pan_UP
p@chr1:181065796..181065797,+	6.44	4.47e-13	2.17	6.21e-08	3.68	8.02e-32	UP	Pan	Pan_UP
p@chr8:101696495..101696496,-	6.43	3.36e-09	1.27	0.00921	2.36	1.54e-11	UP	Solid only	Solid_UP
p@chr10:64917252..64917255,-	6.43	2.15e-10	1.97	0.000337	4.01	5.08e-35	UP	Solid only	Solid_UP
p@chr3:31699401..31699405,+	6.36	7.18e-12	0.7	0.0633	2.33	2.24e-15	UP	Solid only	Solid_UP
p@chr17:41393865..41393870,+	6.32	2.37e-20	2.74	1.9e-10	3.73	4.18e-33	UP	Pan	Pan_UP
p@chr15:75052999..75053003,-	6.32	1.3e-15	7.51	7.8e-29	5.03	9.11e-59	UP	Pan	Pan_UP
p@chr3:53247778..53247780,-	6.31	2.66e-05	0.18	0.954	2.65	1.71e-09	UP	Solid only	Solid_UP
p@chr12:6826147..6826153,+	6.26	1.6e-07	9.95	9.11e-38	6.11	4.78e-50	UP	Pan	Pan_UP
p@chr3:101583701..101583705,+	6.23	0.00014	-1.6	0.0708	2.11	1.99e-05	UP	Solid only	Solid_UP
p@chr6:64284469..64284490,+	6.2	3.23e-05	2.46	0.0104	4.06	4.01e-08	UP	Solid only	Solid_UP
p@chr7:134857220..134857222,-	6.13	0.000215	1.2	0.0314	2.63	8.46e-09	UP	Solid only	Solid_UP
p@chr3:149292578..149292582,-	6.1	3.55e-11	2.98	0.0836	2.75	3.07e-21	UP	Solid only	Solid_UP
p@chr12:6818233..6818241,+	6.09	1.49e-07	5.95	1.18e-27	4.92	2.19e-33	UP	Pan	Pan_UP
p@chr2:172950053..172950081,-	6	4.17e-08	5.43	1.23e-08	2.02	7.78e-09	UP	Pan	Pan_UP
p@chr15:102347644..102347653,+	5.97	1.68e-05	4.08	0.000276	3.31	2.05e-08	UP	Pan	Pan_UP
p@chr3:24024463..24024467,+	5.92	9.29e-11	-0.86	0.0219	2.8	5.75e-23	UP	Solid only	Solid_UP
p@chr8:74258908..74258913,-	5.9	0.0007	7.57	2.73e-05	3.5	1.15e-10	UP	Pan	Pan_UP
p@chr19:40927737..40927760,-	5.85	1.36e-11	0.8	0.133	2.24	2.65e-11	UP	Solid only	Solid_UP
p@chr12:3475259..3475300,-	5.81	0.000297	-6.05	0.00111	4.36	1.78e-15	UP	Solid only	Solid_UP
p@chr9:127600443..127600446,-	5.78	0.00439	8.7	5.14e-12	4.65	7.71e-15	UP	Pan	Pan_UP
p@chr3:133144257..133144263,+	5.73	3.91e-05	0.97	0.162	2.17	1.26e-06	UP	Solid only	Solid_UP
p@chr2:169310156..169310163,-	5.69	2.89e-05	5.72	5.41e-15	4.2	6.5e-17	UP	Pan	Pan_UP
p@chr8:48676790..48676808,-	5.67	8.41e-11	3.58	8.56e-19	3.79	8.73e-44	UP	Pan	Pan_UP
p@chr6:28917117..28917123,-	5.67	4.77e-05	10.82	5.19e-26	3.58	4.52e-15	UP	Pan	Pan_UP
p@chr4:38325054..38325059,-	5.67	5.19e-06	5.51	9.42e-10	3.06	3.82e-10	UP	Pan	Pan_UP
p@chr2:152685303..152685308,+	5.6	3.76e-07	4.21	2.28e-11	3.28	1.35e-15	UP	Pan	Pan_UP
p@chr13:35713908..35713914,+	5.6	5.52e-07	0.28	0.795	2.17	7.76e-09	UP	Solid only	Solid_UP
p@chr17:63449609..63449615,-	5.59	0.0016	3.7	0.0958	5.04	1.69e-15	UP	Solid only	Solid_UP
p@chr2:111895230..111895233,+	5.54	3.16e-09	0.25	0.685	2.04	2.82e-07	UP	Solid only	Solid_UP
p@chr12:53873430..53873439,+	5.5	5.76e-08	1.3	0.036	2.66	8.65e-20	UP	Solid only	Solid_UP
p@chr17:41393591..41393606,+	5.49	1.21e-25	1.84	5.65e-07	3.05	3.72e-32	UP	Solid only	Solid_UP
p@chr8:128838281..128838284,+	5.48	2.44e-05	1	0.039	3.4	1.12e-18	UP	Solid only	Solid_UP
p@chr8:128941462..128941471,+	5.44	5.41e-10	0.93	0.0617	2.88	6.32e-24	UP	Solid only	Solid_UP
p@chr1:109784420..109784424,+	5.42	9.91e-08	1.78	0.000863	3.44	4.08e-28	UP	Solid only	Solid_UP
p@chr8:129046322..129046326,+	5.37	3.47e-05	0.12	0.989	2.13	1.65e-08	UP	Solid only	Solid_UP
p@chr3:176746937..176746950,-	5.36	4.14e-07	2.39	5.69e-07	2.81	1.69e-22	UP	Pan	Pan_UP
p@chr12:46808923..46808926,+	5.35	1.11e-05	0.65	0.26	2.58	5.21e-13	UP	Solid only	Solid_UP
p@chr9:95691523..95691530,-	5.33	0.000117	5.71	3.83e-08	2.13	2.91e-06	UP	Pan	Pan_UP
p@chr5:14437967..14437970,+	5.32	0.0023	2.58	0.0107	2.52	2.05e-07	UP	Solid only	Solid_UP
p@chr19:5231762..5231778,-	5.27	0.00698	0.87	0.649	2.28	0.000115	UP	Solid only	Solid_UP
p@chr7:92230623..92230627,-	5.26	3.21e-07	3.54	2.31e-14	3.35	7e-24	UP	Pan	Pan_UP
p@chrX:73404507..73404508,-	5.24	7.98e-06	2.05	1.04e-05	2.22	1.04e-12	UP	Pan	Pan_UP
p@chr20:33412436..33412439,+	5.23	0.000304	1.72	0.000105	2.45	6.21e-16	UP	Solid only	Solid_UP
p@chr16:24842180..24842181,+	5.22	1.7e-09	2.26	9.53e-06	2.86	1.33e-17	UP	Pan	Pan_UP
p@chr6:45294875..45294878,+	5.2	0.000226	1.18	0.301	3.45	2.94e-13	UP	Solid only	Solid_UP
p@chr1:87828088..87828091,+	5.19	5.04e-05	2.34	0.000518	2.12	2.48e-08	UP	Pan	Pan_UP
p@chr6:30777361..30777365,-	5.17	0.00304	2.12	0.00836	2.86	7.88e-13	UP	Pan	Pan_UP
p@chr8:128909594..128909613,+	5.16	1.28e-09	2.34	4.56e-07	4	2.27e-24	UP	Pan	Pan_UP
p@chr3:129089810..129089831,-	5.15	1.41e-07	-0.87	0.0392	2.35	1.46e-11	UP	Solid only	Solid_UP
p@chr2:85136525..85136554,+	5.12	5.81e-05	3.17	1.57e-09	2.97	1.18e-17	UP	Pan	Pan_UP
p@chr15:76628817..76628823,-	5.12	2.4e-06	2.58	1.5e-05	2.49	3.58e-14	UP	Pan	Pan_UP
p@chr8:146009838..146009844,-	5.11	1.14e-11	2.56	5.51e-11	3.74	3.11e-47	UP	Pan	Pan_UP
p@chr7:149700477..149700562,-	5.09	0.000616	0.09	1	3.92	1.88e-13	UP	Solid only	Solid_UP
p@chr7:11115216..11115224,+	5.09	9.61e-13	1.08	0.000534	2.4	2.78e-19	UP	Solid only	Solid_UP
p@chr7:129282616..129282620,+	5.08	0.00114	0.62	0.243	2.03	5.4e-08	UP	Solid only	Solid_UP
p@chr1:109289537..109289551,-	5.07	9.96e-06	1.15	0.0476	2.35	6.33e-13	UP	Solid only	Solid_UP
p@chr2:200324139..200324151,-	5.04	0.00986	3.93	0.00284	2.22	4.3e-07	UP	Pan	Pan_UP
p@chr17:75120574..75120578,-	5.03	2.32e-06	1.76	0.0408	2.65	1.55e-14	UP	Solid only	Solid_UP
p@chr17:42521841..42521848,-	5.03	3.8e-06	0.05	1	2.07	8.23e-13	UP	Solid only	Solid_UP
p@chr11:115067312..115067316,-	5.02	0.000179	3.05	0.00372	3.17	2.75e-11	UP	Pan	Pan_UP
p@chr17:57604922..57604927,+	4.98	3.78e-07	3.36	3.25e-13	3.17	3.85e-26	UP	Pan	Pan_UP
p@chr11:115239731..115239744,-	4.98	1.22e-05	3.01	0.000693	3.05	7.1e-10	UP	Pan	Pan_UP
p@chr19:30251122..30251130,+	4.97	7.13e-06	7.3	4.18e-18	3.15	1.05e-17	UP	Pan	Pan_UP
p@chr5:170819606..170819610,+	4.96	3.47e-09	0.81	0.0404	2.46	1.7e-18	UP	Solid only	Solid_UP
p@chr17:54974375..54974394,-	4.95	0.00598	1.86	0.00517	2.44	5.13e-07	UP	Solid only	Solid_UP
p@chr19:815919..815944,+	4.93	2.95e-09	0.76	0.096	2.36	4.47e-16	UP	Solid only	Solid_UP
p@chr4:39816639..39816651,-	4.93	7.07e-06	3.15	3.2e-10	3.12	8.08e-22	UP	Pan	Pan_UP
p@chr22:35834120..35834141,+	4.93	8.45e-07	3.08	2.04e-16	3.03	4.58e-27	UP	Pan	Pan_UP
p@chr8:128871079..128871082,+	4.92	4.57e-08	0.99	0.0267	3.21	8.49e-19	UP	Solid only	Solid_UP
p@chr8:129015413..129015428,+	4.91	3.34e-12	1.06	0.00716	2.38	2.56e-24	UP	Solid only	Solid_UP
p@chr8:129056472..129056485,+	4.88	6.11e-10	0.86	0.0963	2.84	2.82e-18	UP	Solid only	Solid_UP
p@chr12:69885308..69885312,+	4.88	0.000561	0.11	0.976	2.8	2.84e-13	UP	Solid only	Solid_UP
p@chr2:136258322..136258327,-	4.86	1.76e-05	2.2	2.51e-08	2.16	8.71e-14	UP	Pan	Pan_UP
p@chr6:108880424..108880430,+	4.85	1.39e-08	1.24	0.00504	2.85	3.57e-20	UP	Solid only	Solid_UP
p@chr8:129086062..129086067,+	4.85	3.19e-11	1.19	0.00559	2.45	5.04e-25	UP	Solid only	Solid_UP
p@chr8:129010691..129010716,+	4.81	4.05e-06	1.02	0.0322	2.19	1.6e-14	UP	Solid only	Solid_UP
p@chr2:173374596..173374600,+	4.8	0.00819	-0.45	0.79	2.31	1.52e-06	UP	Solid only	Solid_UP
p@chr3:49840138..49840142,+	4.76	3.8e-06	3.45	1.79e-08	2.76	2.74e-16	UP	Pan	Pan_UP
p@chr7:86527872..86527876,-	4.76	0.000652	1.19	0.0658	2.96	2.14e-14	UP	Solid only	Solid_UP
p@chr2:148702262..148702267,-	4.75	5.39e-07	1.2	0.000117	2.38	1.29e-20	UP	Solid only	Solid_UP
p@chr12:12304409..12304412,-	4.75	5.32e-06	2.63	6.97e-05	2.5	2.19e-22	UP	Pan	Pan_UP
p@chr1:42344353..42344360,+	4.74	0.000426	4.43	1.39e-05	3.83	1.07e-20	UP	Pan	Pan_UP
p@chr19:48707549..48707554,+	4.71	0.000143	0.21	0.852	2.45	2.14e-12	UP	Solid only	Solid_UP
p@chr13:60459577..60459583,-	4.71	7.6e-07	3.35	2.63e-14	3.12	3.5e-25	UP	Pan	Pan_UP
p@chr3:129118992..129118997,+	4.7	0.000776	2.18	0.000513	2.07	1.63e-07	UP	Pan	Pan_UP
p@chr17:79371008..79371022,-	4.69	7.44e-05	2.29	0.00628	2.63	3.43e-13	UP	Pan	Pan_UP
p@chr20:61200367..61200387,-	4.66	0.00767	1.96	0.151	3.75	6.44e-11	UP	Solid only	Solid_UP
p@chr5:138626154..138626159,+	4.66	1.2e-06	4.14	2.25e-19	3.19	1.22e-30	UP	Pan	Pan_UP
p@chr2:121797299..121797304,+	4.65	0.00473	6.65	2.52e-05	4.02	1.08e-13	UP	Pan	Pan_UP
p@chr1:43387667..43387671,-	4.64	0.000489	1.05	0.0958	3.27	1.6e-14	UP	Solid only	Solid_UP
p@chr17:57924805..57924810,+	4.64	7.24e-14	0.07	1	3.39	1.03e-36	UP	Solid only	Solid_UP
p@chr22:38053921..38053929,-	4.62	3.34e-05	3.34	5.24e-11	2.4	9.22e-09	UP	Pan	Pan_UP
p@chrX:118466905..118466911,+	4.61	0.00674	11.3	4.92e-17	5.34	2.15e-18	UP	Pan	Pan_UP
p@chr16:80999072..80999078,-	4.6	0.00283	1.45	0.0103	2.58	2.35e-16	UP	Solid only	Solid_UP
p@chr6:126608114..126608118,+	4.58	2.41e-07	1.67	4.36e-05	2.9	8.67e-29	UP	Solid only	Solid_UP
p@chr13:30756507..30756513,+	4.58	0.00124	9.59	1.97e-15	4.09	2.03e-16	UP	Pan	Pan_UP
p@chr1:110917768..110917772,+	4.57	2.84e-05	1.55	6.99e-06	2.12	3.53e-13	UP	Solid only	Solid_UP
p@chr12:120125659..120125702,-	4.57	4.54e-05	2.94	8.26e-06	2.19	3.21e-12	UP	Pan	Pan_UP
p@chr7:29692552..29692555,-	4.56	0.000161	1.68	0.00947	2.39	2.82e-11	UP	Solid only	Solid_UP
p@chr5:32104819..32104823,-	4.56	2.09e-05	2.34	4.76e-06	2.15	8.28e-17	UP	Pan	Pan_UP
p@chr4:24522666..24522670,-	4.55	7.4e-05	2	7.96e-06	2.59	3.85e-13	UP	Solid only	Solid_UP
p@chr6:27111622..27111626,-	4.55	1.29e-07	2.69	1.01e-11	2.82	4.2e-17	UP	Pan	Pan_UP
p@chr17:73139026..73139044,-	4.54	2.79e-08	2.54	1.03e-13	2.73	8.14e-32	UP	Pan	Pan_UP
p@chr5:1571903..1571907,-	4.54	0.000124	1.68	0.00033	2.39	1.24e-11	UP	Solid only	Solid_UP
p@chr11:115368690..115368693,-	4.54	0.00592	0.81	0.517	2.5	7.35e-07	UP	Solid only	Solid_UP
p@chr20:21487030..21487048,-	4.51	0.00524	5.69	1.18e-07	3.09	2.78e-07	UP	Pan	Pan_UP
p@chr10:105128353..105128379,-	4.51	1.49e-06	0.73	0.0381	2.12	1.75e-13	UP	Solid only	Solid_UP
p@chr11:74465903..74465909,-	4.5	0.00203	4.05	0.000457	2.5	3.41e-09	UP	Pan	Pan_UP
p@chr11:70217585..70217629,-	4.5	6.2e-07	4.59	1.02e-11	2.88	1.75e-24	UP	Pan	Pan_UP
p@chr1:27692193..27692207,+	4.49	1.88e-05	1.61	0.017	2.13	9.84e-11	UP	Solid only	Solid_UP
p@chr1:86045923..86045935,+	4.46	0.000167	6.16	0.000141	3.04	7.8e-18	UP	Pan	Pan_UP
p@chr20:50711396..50711399,-	4.44	0.00326	5.21	3.9e-10	3.9	4.97e-22	UP	Pan	Pan_UP
p@chr17:45763388..45763392,+	4.43	6.75e-05	1.82	4.73e-05	2.82	1.03e-14	UP	Solid only	Solid_UP
p@chr13:45266475..45266481,+	4.43	3.28e-07	5.89	7.58e-20	3.55	6.32e-31	UP	Pan	Pan_UP
p@chr8:64132471..64132477,+	4.43	1.27e-06	0.99	0.0185	2.02	4.16e-16	UP	Solid only	Solid_UP
p@chr2:55184488..55184491,-	4.43	0.000473	1.24	0.0509	3.28	1.49e-14	UP	Solid only	Solid_UP
p@chr8:128909509..128909531,+	4.42	3.29e-06	1.9	4.1e-05	3.62	3.05e-28	UP	Solid only	Solid_UP
p@chr8:146010488..146010492,-	4.42	6.61e-05	3.03	1.32e-11	3.39	5.05e-36	UP	Pan	Pan_UP
p@chr8:98795318..98795322,+	4.41	2.67e-05	1.05	0.137	3.16	4.82e-27	UP	Solid only	Solid_UP
p@chr1:244815812..244815818,-	4.41	1.11e-05	1.21	0.0719	2.07	3.15e-09	UP	Solid only	Solid_UP
p@chr11:46413318..46413337,-	4.39	0.00328	4.9	0.000151	2.89	2.72e-09	UP	Pan	Pan_UP
p@chr2:30762138..30762142,+	4.37	2.81e-05	1.17	0.000506	2.95	2.14e-27	UP	Solid only	Solid_UP
p@chr7:23422510..23422514,-	4.37	1.23e-08	5.32	2.72e-18	3.55	1.48e-46	UP	Pan	Pan_UP
p@chr8:129015057..129015074,+	4.35	5.26e-11	1.12	0.0147	2.28	1.75e-19	UP	Solid only	Solid_UP
p@chr1:178342425..178342426,+	4.35	2.98e-07	0.03	1	2.2	5.65e-15	UP	Solid only	Solid_UP
p@chr3:36555727..36555729,+	4.34	9.12e-05	0.98	0.341	2.86	1.8e-16	UP	Solid only	Solid_UP
p@chr2:200324942..200324949,+	4.33	9.19e-05	4.69	4.55e-05	3.08	4.63e-18	UP	Pan	Pan_UP
p@chr20:57194992..57194997,+	4.31	1.84e-05	4.09	3.37e-11	2.27	3.51e-08	UP	Pan	Pan_UP
p@chr20:42286235..42286249,+	4.31	0.00367	-0.27	0.698	2.71	1.02e-19	UP	Solid only	Solid_UP
p@chr15:72514263..72514265,-	4.31	3.88e-05	1.25	0.0106	2.03	2.74e-12	UP	Solid only	Solid_UP
p@chr11:117997240..117997243,+	4.3	0.000393	5.56	3.48e-15	2.25	7.74e-08	UP	Pan	Pan_UP
p@chr17:56069830..56069835,-	4.3	2.45e-05	1.23	0.00191	2.88	4.34e-29	UP	Solid only	Solid_UP
p@chrX:10560311..10560314,-	4.3	2.59e-06	1.34	0.278	2.35	1.33e-13	UP	Solid only	Solid_UP
p@chr3:138357240..138357242,-	4.27	3.24e-13	0.59	0.086	2.41	4.73e-22	UP	Solid only	Solid_UP
p@chr8:141799375..141799380,-	4.26	6.93e-05	0.52	0.636	2.63	5.71e-25	UP	Solid only	Solid_UP
p@chr1:214816318..214816335,+	4.24	0.000419	4.05	3.88e-18	2.9	2.06e-23	UP	Pan	Pan_UP
p@chr8:146008224..146008227,-	4.18	4.66e-10	2.2	9.99e-12	3.25	1.13e-56	UP	Pan	Pan_UP
p@chr16:771593..771612,+	4.17	0.00631	1.32	0.111	2.22	2.36e-07	UP	Solid only	Solid_UP
p@chr19:56116608..56116632,-	4.17	0.00246	4.46	6.1e-13	2.64	2.9e-12	UP	Pan	Pan_UP
p@chr19:815894..815906,+	4.17	1.36e-05	0.7	0.18	2.44	1.87e-10	UP	Solid only	Solid_UP
p@chr20:47710129..47710133,+	4.16	0.00221	1.08	0.0154	2.5	2.18e-16	UP	Solid only	Solid_UP
p@chr14:23120305..23120309,+	4.16	1.29e-11	6.85	3.44e-48	2.72	4.36e-17	UP	Pan	Pan_UP
p@chr11:1372935..1372952,+	4.15	2.34e-17	7.21	3.72e-55	4.92	4.06e-84	UP	Pan	Pan_UP
p@chr9:14993142..14993181,-	4.15	0.00328	4.6	1.39e-06	3.1	4.59e-15	UP	Pan	Pan_UP
p@chr7:100806567..100806600,-	4.14	2.62e-05	5.39	5.35e-14	3.96	3.97e-35	UP	Pan	Pan_UP
p@chr11:115078302..115078307,-	4.12	0.00949	5.27	0.000103	3.27	2.08e-11	UP	Pan	Pan_UP
p@chr1:65221435..65221440,+	4.1	1.93e-06	1.8	0.000205	2.75	6.25e-30	UP	Solid only	Solid_UP
p@chr11:103077973..103077978,+	4.1	0.00586	0.61	0.825	2.9	6.97e-12	UP	Solid only	Solid_UP
p@chr14:69847116..69847128,-	4.09	1.81e-07	2.31	9.41e-06	2.51	3.83e-19	UP	Pan	Pan_UP
p@chr15:41672357..41672421,+	4.09	1.71e-11	3.58	1.02e-29	2.4	7.52e-23	UP	Pan	Pan_UP
p@chr17:79370955..79370978,-	4.08	5.56e-07	0.3	0.819	2.71	4.45e-22	UP	Solid only	Solid_UP
p@chr4:12951785..12951789,-	4.08	0.00942	0.76	0.143	2.25	3.56e-08	UP	Solid only	Solid_UP
p@chr1:110926453..110926457,+	4.07	0.00493	1.71	3.64e-05	2.48	5.42e-16	UP	Solid only	Solid_UP
p@chr1:214819709..214819731,+	4.06	0.000937	4.48	7.34e-18	2.34	6.46e-15	UP	Pan	Pan_UP
p@chr1:98519916..98519967,+	4.06	0.00277	3.63	0.103	2.68	1.09e-10	UP	Solid only	Solid_UP
p@chr12:125424268..125424273,-	4.04	0.000284	1.83	7.88e-05	2.3	1.08e-13	UP	Solid only	Solid_UP
p@chr12:133298658..133298670,+	4.04	0.00842	2.59	1.08e-06	2.22	9.31e-09	UP	Pan	Pan_UP
p@chr6:13632400..13632402,+	4.04	0.00866	0.91	0.0712	2.19	4.57e-11	UP	Solid only	Solid_UP
p@chr2:160118440..160118443,+	4.04	0.00264	4.38	6.91e-05	3.59	8.55e-21	UP	Pan	Pan_UP
p@chr2:215656871..215656875,-	4.04	0.000114	0.85	0.0238	2.71	4.06e-23	UP	Solid only	Solid_UP
p@chr8:126290719..126290725,-	4.03	0.00361	1.78	0.0115	3	2.09e-11	UP	Solid only	Solid_UP
p@chr1:7764596..7764633,-	4.03	0.000771	-1.32	0.0323	3.11	7.08e-17	UP	Solid only	Solid_UP
p@chr12:120731503..120731510,+	4.02	0.000258	4.18	4.83e-21	3.06	3.15e-25	UP	Pan	Pan_UP
p@chr1:46062993..46062997,+	4.01	6.36e-14	0.92	0.00171	2.51	3.08e-26	UP	Solid only	Solid_UP
p@chr7:122374400..122374411,-	4.01	0.00222	1.9	0.0289	2.08	9.39e-07	UP	Solid only	Solid_UP
p@chr6:36331396..36331401,-	4	0.000272	6.31	9.67e-25	2.45	2.88e-14	UP	Pan	Pan_UP
p@chr8:104463382..104463385,+	4	5.61e-07	1.57	1.83e-05	2.45	2.35e-22	UP	Solid only	Solid_UP
p@chr3:167452405..167452409,+	3.99	0.00978	1.78	0.000749	2.08	1.29e-07	UP	Solid only	Solid_UP
p@chr8:128909653..128909681,+	3.99	1.02e-12	2.27	1.21e-07	4	5.44e-38	UP	Pan	Pan_UP
p@chr10:34678163..34678168,-	3.99	6.32e-06	3.95	9.46e-06	2.74	2.97e-18	UP	Pan	Pan_UP
p@chr16:89995386..89995391,+	3.98	6.48e-06	3.85	5.42e-07	2.62	2.66e-21	UP	Pan	Pan_UP
p@chr14:99787551..99787555,+	3.97	0.00123	2.65	0.000302	2.49	4.22e-10	UP	Pan	Pan_UP
p@chr17:70560894..70560899,-	3.96	0.000207	-0.21	1	4.03	3.47e-22	UP	Solid only	Solid_UP
p@chr1:840185..840202,+	3.94	0.000157	4.49	1.79e-14	2.46	1.56e-17	UP	Pan	Pan_UP
p@chrX:118977232..118977248,-	3.93	0.000281	2.67	1.61e-15	2.68	6.05e-29	UP	Pan	Pan_UP
p@chr5:78786896..78786897,-	3.93	0.000719	0.99	0.114	2.33	9.92e-10	UP	Solid only	Solid_UP
p@chr2:159413050..159413053,+	3.92	2.49e-07	1.39	9.34e-05	2.04	1.26e-15	UP	Solid only	Solid_UP
p@chr1:165820189..165820195,+	3.92	0.0095	2.53	1.74e-10	2.54	2.35e-20	UP	Pan	Pan_UP
p@chr1:235268802..235268805,-	3.9	5.02e-19	2.18	4.53e-16	2.32	1.11e-40	UP	Pan	Pan_UP
p@chr3:73160556..73160583,+	3.89	2.54e-12	2.99	1.59e-15	2.27	6.61e-26	UP	Pan	Pan_UP
p@chr11:28080032..28080036,-	3.89	6.43e-09	2.96	6.37e-22	2.39	2.39e-23	UP	Pan	Pan_UP
p@chr3:149265007..149265013,-	3.87	0.00012	2.52	0.0682	2.16	1e-10	UP	Solid only	Solid_UP
p@chr8:103834895..103834918,-	3.87	6.18e-08	2.54	1.71e-11	2.66	4.98e-28	UP	Pan	Pan_UP
p@chrX:154341420..154341424,+	3.87	0.00599	1.06	0.00697	2.18	5.94e-12	UP	Solid only	Solid_UP
p@chr1:146770695..146770699,+	3.85	1.2e-16	2.66	2.81e-19	2.7	1.21e-24	UP	Pan	Pan_UP
p@chr9:20338726..20338730,-	3.85	0.00785	-0.1	1	2.64	1.34e-11	UP	Solid only	Solid_UP
p@chr5:176015730..176015786,-	3.84	0.0016	4.35	5.97e-08	3.22	8.73e-19	UP	Pan	Pan_UP
p@chr8:129015029..129015044,+	3.84	3.58e-08	1.59	1.56e-05	2.45	2.73e-24	UP	Solid only	Solid_UP
p@chr20:52369856..52369863,-	3.82	0.00206	4.38	2.39e-09	2.55	1.32e-09	UP	Pan	Pan_UP
p@chr9:20866915..20866919,+	3.81	0.00554	0.62	0.213	2.33	2.76e-15	UP	Solid only	Solid_UP
p@chr17:57923578..57923582,+	3.81	1.9e-07	0.31	0.506	2.39	2.3e-22	UP	Solid only	Solid_UP
p@chr7:64734239..64734316,+	3.8	9.73e-05	8.72	5.37e-33	4.91	1.44e-28	UP	Pan	Pan_UP
p@chr20:32855261..32855266,-	3.78	6.41e-07	3.3	2.22e-16	3.9	1.44e-49	UP	Pan	Pan_UP
p@chrX:153191162..153191167,+	3.77	0.00038	1.22	0.00692	2.29	4.87e-15	UP	Solid only	Solid_UP
p@chr5:14308081..14308101,+	3.76	0.000968	2.33	0.000332	2.31	1.2e-10	UP	Pan	Pan_UP
p@chr5:170638653..170638659,+	3.74	0.00134	3.49	0.000208	2.48	2.01e-15	UP	Pan	Pan_UP
p@chr8:145754581..145754587,+	3.74	0.00109	3.77	1.28e-09	2.68	1.05e-14	UP	Pan	Pan_UP
p@chr10:120895300..120895303,-	3.73	4.44e-07	1.06	0.00126	2.37	4.17e-16	UP	Solid only	Solid_UP
p@chr5:127530266..127530271,+	3.73	2.15e-08	0.36	0.378	2.04	1.27e-13	UP	Solid only	Solid_UP
p@chr1:26227600..26227611,-	3.68	5.47e-07	3.56	1.27e-19	3.34	2.9e-39	UP	Pan	Pan_UP
p@chr8:129015089..129015108,+	3.68	3.05e-08	0.81	0.124	2.05	1.29e-13	UP	Solid only	Solid_UP
p@chr10:96314425..96314431,+	3.67	5.13e-07	2.52	9.26e-12	3.13	5.68e-32	UP	Pan	Pan_UP
p@chr20:25535257..25535261,-	3.67	0.000966	2.27	0.0254	2.92	8.65e-22	UP	Solid only	Solid_UP
p@chr2:184056425..184056429,+	3.67	0.00978	1.23	0.00191	2.14	1.22e-11	UP	Solid only	Solid_UP
p@chr3:129118836..129118841,+	3.66	3e-11	1.78	1.61e-07	2.12	5.38e-18	UP	Solid only	Solid_UP
p@chr11:65071546..65071558,+	3.66	0.000182	1.88	7.7e-08	2.57	1.22e-27	UP	Solid only	Solid_UP
p@chr1:76260891..76260903,+	3.64	3.08e-11	1.41	1.89e-11	2.08	9.43e-30	UP	Solid only	Solid_UP
p@chr1:46503176..46503184,+	3.64	0.000541	2.91	1.53e-08	2.29	3.32e-11	UP	Pan	Pan_UP
p@chr2:133104839..133104849,-	3.64	0.000319	3.79	0.0875	3.53	1.81e-20	UP	Solid only	Solid_UP
p@chr6:26198106..26198110,-	3.64	1.44e-09	1.52	1.5e-08	2.33	4.46e-26	UP	Solid only	Solid_UP
p@chr1:28838190..28838193,+	3.62	9.97e-11	3.9	1.22e-31	2.04	3.95e-20	UP	Pan	Pan_UP
p@chr17:38556243..38556260,-	3.61	0.000333	4.7	1.7e-23	2.24	1.02e-13	UP	Pan	Pan_UP
p@chr9:95946404..95946506,+	3.61	3.25e-07	2.82	0.000958	3.93	7.28e-20	UP	Pan	Pan_UP
p@chr17:44136991..44136995,-	3.6	0.000296	0.49	0.224	2.1	9.49e-16	UP	Solid only	Solid_UP
p@chr4:87521610..87521614,+	3.6	0.00143	2.54	0.000133	2.54	8.14e-14	UP	Pan	Pan_UP
p@chr9:125885801..125885812,-	3.6	0.0054	0.31	0.636	2.84	2.19e-16	UP	Solid only	Solid_UP
p@chr7:11012953..11012969,+	3.59	1.81e-05	2.04	3.42e-08	2.73	1.03e-31	UP	Pan	Pan_UP
p@chr5:135519323..135519327,+	3.56	1.81e-06	2.1	2.18e-07	2.47	2.95e-22	UP	Pan	Pan_UP
p@chr19:18499913..18499928,+	3.56	0.000447	2.08	0.217	2.51	2.36e-11	UP	Solid only	Solid_UP
p@chr2:100938666..100938682,-	3.56	0.000478	2.72	0.00297	3.15	4.28e-12	UP	Pan	Pan_UP
p@chr8:98793526..98793530,+	3.55	5.38e-05	0.22	0.885	3.22	3.64e-27	UP	Solid only	Solid_UP
p@chr16:72781146..72781152,+	3.55	0.000654	2.38	3.92e-10	2.98	1.67e-23	UP	Pan	Pan_UP
p@chr2:168146495..168146501,-	3.55	0.00454	-1.12	0.589	2.3	1.2e-05	UP	Solid only	Solid_UP
p@chr18:19612834..19612841,-	3.54	0.00186	0	1	2.8	5.15e-10	UP	Solid only	Solid_UP
p@chr19:10400020..10400037,+	3.53	0.000298	4.27	2.37e-18	2.04	4.95e-10	UP	Pan	Pan_UP
p@chr8:129010478..129010491,+	3.52	0.000744	0.37	0.385	2.22	4.96e-19	UP	Solid only	Solid_UP
p@chr5:179041450..179041466,-	3.51	2.7e-05	1.11	0.00285	2.34	1.98e-21	UP	Solid only	Solid_UP
p@chr11:34132130..34132138,+	3.5	8.01e-05	1.53	2.08e-06	2.26	2.84e-18	UP	Solid only	Solid_UP
p@chr2:108972782..108972789,+	3.5	0.00525	4.58	7.22e-10	2.77	1.47e-09	UP	Pan	Pan_UP
p@chr7:40104588..40104594,+	3.5	0.000256	-0.6	0.0814	2.03	2.05e-11	UP	Solid only	Solid_UP
p@chr7:92234189..92234193,-	3.49	0.00118	2.87	3.82e-14	2.68	6e-18	UP	Pan	Pan_UP
p@chr19:28284079..28284110,-	3.48	5.45e-05	4.86	5.32e-20	3.04	2.42e-26	UP	Pan	Pan_UP
p@chr6:5245318..5245323,-	3.48	1.28e-08	0.63	0.0849	2.18	1.43e-24	UP	Solid only	Solid_UP
p@chr14:94640940..94640945,+	3.47	0.00219	2.8	0.000746	2.54	1.71e-17	UP	Pan	Pan_UP
p@chr22:29294937..29294941,+	3.46	0.00379	1.23	0.0261	2.53	1.92e-15	UP	Solid only	Solid_UP
p@chr3:138582577..138582582,+	3.45	0.000552	2.99	5.56e-08	3	1.21e-20	UP	Pan	Pan_UP
p@chr22:42720402..42720435,-	3.44	0.00387	1.45	0.108	3.06	7.15e-19	UP	Solid only	Solid_UP
p@chr2:100938607..100938634,-	3.44	0.0055	1.52	0.195	2.53	2e-08	UP	Solid only	Solid_UP
p@chr10:96327980..96327984,+	3.43	2.69e-08	1.96	8.17e-09	3.41	7.94e-50	UP	Solid only	Solid_UP
p@chr17:38552599..38552612,-	3.41	3.09e-08	4.9	1.72e-42	2.51	3.68e-20	UP	Pan	Pan_UP
p@chr17:39835021..39835026,-	3.41	1.5e-11	3.34	1.01e-20	3.37	2.21e-25	UP	Pan	Pan_UP
p@chr17:60085676..60085677,-	3.39	0.00194	1.53	0.000504	2.01	7.99e-11	UP	Solid only	Solid_UP
p@chr10:129907093..129907109,-	3.39	2.88e-06	3.13	5.56e-12	2.28	4.52e-16	UP	Pan	Pan_UP
p@chr12:120183177..120183178,-	3.38	4.78e-05	2.19	3.73e-07	2.3	8.78e-13	UP	Pan	Pan_UP
p@chr20:32307706..32307712,-	3.37	0.000275	0.45	0.407	2.16	2.57e-14	UP	Solid only	Solid_UP
p@chr15:30217398..30217403,+	3.36	0.00854	2.39	0.372	2.05	3.48e-08	UP	Solid only	Solid_UP
p@chr9:131317921..131317925,+	3.35	8.21e-05	0.66	0.161	2.2	1.48e-15	UP	Solid only	Solid_UP
p@chr2:230619517..230619521,-	3.35	0.000338	1.43	0.000383	2.47	3.55e-19	UP	Solid only	Solid_UP
p@chr17:18247888..18247891,-	3.35	0.00418	1.83	5.89e-05	2.4	4.52e-15	UP	Solid only	Solid_UP
p@chr12:85304957..85304960,-	3.34	0.00687	5.3	0.00164	2.1	1.54e-07	UP	Pan	Pan_UP
p@chr7:23374688..23374692,-	3.33	0.00033	4.73	1.13e-12	3.06	5.15e-30	UP	Pan	Pan_UP
p@chr7:110908538..110908544,-	3.32	0.00572	0.88	0.054	2.31	3.05e-17	UP	Solid only	Solid_UP
p@chr8:129010718..129010746,+	3.32	0.000529	1.94	0.000229	2.24	1.21e-12	UP	Solid only	Solid_UP
p@chr12:31548873..31548877,-	3.32	0.00173	0.16	1	2.09	1.26e-14	UP	Solid only	Solid_UP
p@chr3:196848690..196848695,-	3.32	2.11e-08	0.26	0.501	2.6	1.96e-32	UP	Solid only	Solid_UP
p@chr3:99676564..99676569,+	3.31	0.000142	1.34	5.17e-05	2.38	2.24e-18	UP	Solid only	Solid_UP
p@chr15:69460179..69460183,+	3.31	0.00371	0.54	0.185	2.73	3.2e-17	UP	Solid only	Solid_UP
p@chr14:95725440..95725533,-	3.3	5.47e-05	-0.56	0.393	2.55	1.85e-14	UP	Solid only	Solid_UP
p@chr16:89913234..89913238,+	3.28	0.00323	1.25	0.177	3.26	1.86e-16	UP	Solid only	Solid_UP
p@chr1:223254666..223254683,-	3.27	0.00858	-1.39	0.278	2.33	9.46e-09	UP	Solid only	Solid_UP
p@chr20:5100020..5100038,-	3.26	0.0028	3.13	1.65e-09	2.49	3.02e-14	UP	Pan	Pan_UP
p@chr2:153463537..153463541,+	3.25	0.0032	-0.33	0.823	2.18	4.37e-12	UP	Solid only	Solid_UP
p@chr16:72459229..72459233,-	3.25	0.000137	3.02	8.77e-15	2.31	9.86e-25	UP	Pan	Pan_UP
p@chr16:87812735..87812759,-	3.24	0.00155	6.43	1.18e-21	2.12	6.55e-11	UP	Pan	Pan_UP
p@chrX:118971965..118971983,-	3.2	4.85e-05	2.66	2.32e-13	2.22	8.9e-18	UP	Pan	Pan_UP
p@chr5:14307941..14307957,+	3.18	3.7e-05	3.07	1.12e-08	2.16	5.43e-12	UP	Pan	Pan_UP
p@chr14:69006907..69006911,+	3.18	0.00515	-0.18	0.835	3.03	9.79e-16	UP	Solid only	Solid_UP
p@chr15:79296862..79296940,-	3.18	0.00077	2.65	7.34e-07	2.68	1.64e-14	UP	Pan	Pan_UP
p@chr5:145485139..145485142,-	3.17	0.0047	3.35	9.79e-12	2.32	7.68e-14	UP	Pan	Pan_UP
p@chr12:77456660..77456668,-	3.16	0.00868	3.15	2.44e-11	2.16	2.11e-12	UP	Pan	Pan_UP
p@chr7:95847209..95847213,-	3.15	8.73e-06	0.53	0.22	2.21	3.46e-16	UP	Solid only	Solid_UP
p@chrX:135944682..135944686,-	3.13	1.6e-05	1.07	0.00206	2.14	1.67e-18	UP	Solid only	Solid_UP
p@chr1:214814697..214814711,+	3.12	0.000212	4.75	1.12e-33	2.21	2.16e-18	UP	Pan	Pan_UP
p@chr11:63808668..63808671,-	3.11	0.00145	2.17	4.91e-06	2.6	9.84e-20	UP	Pan	Pan_UP
p@chr3:196861340..196861344,-	3.1	1.62e-05	0.53	0.276	2.56	4.55e-27	UP	Solid only	Solid_UP
p@chr9:127473463..127473467,-	3.1	0.000127	3.06	1.21e-13	3.13	1.18e-31	UP	Pan	Pan_UP
p@chr3:65841412..65841450,-	3.09	2.18e-05	3.23	9.11e-05	2.13	6.7e-18	UP	Pan	Pan_UP
p@chr10:129906581..129906598,-	3.08	0.000207	3.65	3.49e-23	2.08	1.56e-15	UP	Pan	Pan_UP
p@chr12:31430309..31430312,-	3.07	0.000619	1.12	0.000621	2.66	4.2e-24	UP	Solid only	Solid_UP
p@chr8:129010544..129010566,+	3.06	2.94e-11	0.69	0.0606	2.2	6.27e-30	UP	Solid only	Solid_UP
p@chr16:28835855..28835868,+	3.04	0.00885	3.1	8.51e-08	2.19	1.5e-11	UP	Pan	Pan_UP
p@chr7:27645203..27645204,-	3.01	1.55e-05	0.63	0.138	2.69	7.84e-25	UP	Solid only	Solid_UP
p@chr1:21305168..21305171,-	3	0.00375	0.93	0.0577	2	1.69e-12	UP	Solid only	Solid_UP
p@chr14:23471045..23471048,-	3	6.08e-10	1.52	4.25e-09	2.09	2.9e-24	UP	Solid only	Solid_UP
p@chr17:34890037..34890055,-	2.98	0.00188	5.41	1.47e-11	2.7	1.68e-25	UP	Pan	Pan_UP
p@chr2:45798653..45798657,-	2.94	0.000457	1.43	7.81e-06	2.53	2.19e-23	UP	Solid only	Solid_UP
p@chr2:71647132..71647136,+	2.93	3.37e-07	1.35	7.43e-06	2.42	3.8e-28	UP	Solid only	Solid_UP
p@chr11:2696059..2696063,-	2.93	6.3e-10	3.3	1.03e-23	2.04	1.71e-18	UP	Pan	Pan_UP
p@chr6:56445845..56445850,-	2.91	0.00194	3.61	0.00011	2.21	2.3e-15	UP	Pan	Pan_UP
p@chr10:96363899..96363904,+	2.89	5.38e-10	2.92	8.5e-22	2.93	8.25e-47	UP	Pan	Pan_UP
p@chr2:236503549..236503554,+	2.88	0.00187	3.2	0.0171	2.49	2.38e-16	UP	Solid only	Solid_UP
p@chr7:25019165..25019181,+	2.87	8.1e-07	2.9	5.46e-17	2.36	8.91e-24	UP	Pan	Pan_UP
p@chr21:18949958..18949961,+	2.87	0.00908	2	0.0284	3.86	1.02e-26	UP	Solid only	Solid_UP
p@chr16:3202894..3202899,+	2.86	0.000496	2.96	1.37e-08	2.84	1.44e-22	UP	Pan	Pan_UP
p@chr18:14123213..14123218,-	2.85	1.3e-05	1.64	2.53e-09	2.49	3.36e-19	UP	Solid only	Solid_UP
p@chr2:44935374..44935378,+	2.84	0.000136	-0.31	0.464	2.04	8.9e-14	UP	Solid only	Solid_UP
p@chr19:14258941..14258963,-	2.81	0.00259	2.08	0.000217	2.24	1.98e-16	UP	Pan	Pan_UP
p@chr11:100708427..100708432,+	2.8	0.00324	0.15	1	2.54	3.3e-14	UP	Solid only	Solid_UP
p@chr17:80107242..80107268,-	2.79	0.00437	1.37	0.000382	2.04	8.75e-20	UP	Solid only	Solid_UP
p@chr5:145495141..145495145,-	2.77	6.65e-07	1.65	1.01e-06	2.09	1.57e-21	UP	Solid only	Solid_UP
p@chr6:35847848..35847853,-	2.75	0.00211	1.14	0.000675	2.24	3.95e-21	UP	Solid only	Solid_UP
p@chr11:27379028..27379048,-	2.74	8.77e-05	3.9	5.61e-23	2.2	8.09e-17	UP	Pan	Pan_UP
p@chr7:140434570..140434575,-	2.74	6.22e-07	0.26	0.454	2.27	4.78e-24	UP	Solid only	Solid_UP
p@chr10:96365418..96365423,+	2.74	0.00222	2.57	3.16e-12	2.37	1.61e-23	UP	Pan	Pan_UP
p@chr3:185216922..185216950,+	2.73	0.00995	1.12	0.00416	2.68	1.57e-21	UP	Solid only	Solid_UP
p@chr17:55726628..55726661,+	2.71	0.000922	0.37	0.434	2.33	1.05e-10	UP	Solid only	Solid_UP
p@chr9:133329963..133329995,+	2.71	0.00436	10.31	1.15e-18	2.31	5.01e-14	UP	Pan	Pan_UP
p@chr21:44260635..44260732,-	2.7	6.39e-09	2.34	2.39e-13	2.61	1.52e-33	UP	Pan	Pan_UP
p@chr2:110346423..110346428,-	2.7	0.00179	2.32	0.0236	2.5	7.75e-20	UP	Solid only	Solid_UP
p@chr12:50390408..50390412,-	2.69	5.48e-06	2.49	3.67e-10	2.17	1.34e-15	UP	Pan	Pan_UP
p@chr5:68338547..68338553,-	2.69	8.83e-05	2.55	1.87e-10	2.12	3.67e-14	UP	Pan	Pan_UP
p@chr17:38552641..38552655,-	2.69	0.00057	4.7	8.13e-38	2.57	3.2e-27	UP	Pan	Pan_UP
p@chr7:100806918..100806934,-	2.68	1.19e-05	3.01	1.3e-08	3.17	1.73e-31	UP	Pan	Pan_UP
p@chr12:95699725..95699730,+	2.68	6.17e-07	0.21	0.585	2.13	9.55e-24	UP	Solid only	Solid_UP
p@chr1:179166688..179166692,-	2.67	0.00418	1.11	0.00231	2.14	4.66e-15	UP	Solid only	Solid_UP
p@chr2:153220806..153220809,+	2.65	0.000477	1.21	0.147	2.15	3.36e-14	UP	Solid only	Solid_UP
p@chr11:78172645..78172649,-	2.64	1.99e-13	1.28	1.13e-07	2.54	1.88e-52	UP	Solid only	Solid_UP
p@chr9:102960596..102960601,+	2.63	0.00355	0.5	0.171	2.09	2.66e-22	UP	Solid only	Solid_UP
p@chr16:31202711..31202730,+	2.62	8.21e-06	0.42	0.271	2.06	8.46e-18	UP	Solid only	Solid_UP
p@chr16:778322..778398,-	2.62	1.24e-06	3.26	6.54e-25	2.09	3.1e-27	UP	Pan	Pan_UP
p@chr8:141769626..141769630,-	2.6	0.000149	1.38	0.141	2.66	4.93e-25	UP	Solid only	Solid_UP
p@chrX:24824225..24824229,+	2.59	4.42e-05	1.61	4.13e-07	2.56	1.07e-23	UP	Solid only	Solid_UP
p@chr17:40170506..40170551,-	2.59	0.00269	7.68	9.22e-29	2.62	1.72e-18	UP	Pan	Pan_UP
p@chr20:49367522..49367525,+	2.56	7.53e-05	0.36	0.466	2.18	3.5e-11	UP	Solid only	Solid_UP
p@chr20:35393646..35393650,-	2.56	0.000181	1.37	1.32e-06	2.08	1.11e-21	UP	Solid only	Solid_UP
p@chr3:20208331..20208335,-	2.55	4.3e-06	3.13	2.35e-22	2.3	7.53e-23	UP	Pan	Pan_UP
p@chr3:38496931..38496961,-	2.55	0.00335	3.72	2.23e-07	2.14	1.67e-19	UP	Pan	Pan_UP
p@chr2:48028524..48028528,+	2.55	0.000143	0.98	0.00343	2.05	7.15e-19	UP	Solid only	Solid_UP
p@chr7:24725286..24725290,+	2.52	5.96e-05	1.33	0.000793	2.28	1.54e-22	UP	Solid only	Solid_UP
p@chr1:8755642..8755647,-	2.51	0.000262	1.04	0.0115	2.48	1.62e-18	UP	Solid only	Solid_UP
p@chr2:153455950..153455955,+	2.51	0.000489	-0.73	0.39	2.13	1.16e-14	UP	Solid only	Solid_UP
p@chr15:30031065..30031070,-	2.5	0.00371	2.51	0.107	2.02	9.54e-17	UP	Solid only	Solid_UP
p@chr8:129091266..129091270,+	2.5	1.41e-08	1.02	0.00642	2.55	2.64e-29	UP	Solid only	Solid_UP
p@chr1:45982690..45982694,-	2.5	7.54e-10	2.87	9.02e-14	2.67	6.85e-41	UP	Pan	Pan_UP
p@chr10:129905850..129905864,-	2.48	0.000257	4.29	2.1e-30	2.09	2.23e-17	UP	Pan	Pan_UP
p@chr8:124383939..124383977,-	2.47	1.18e-06	2.47	1.13e-15	2.38	5.55e-21	UP	Pan	Pan_UP
p@chr3:10032033..10032038,+	2.45	0.000876	1.95	5.67e-11	2.16	2.44e-19	UP	Solid only	Solid_UP
p@chr10:96365839..96365850,+	2.42	3.59e-05	3.06	6.53e-21	2.74	4.77e-39	UP	Pan	Pan_UP
p@chr8:22927839..22927845,-	2.41	0.00496	2.6	1.3e-07	2.3	9.15e-21	UP	Pan	Pan_UP
p@chr17:55172846..55172850,+	2.41	2.52e-05	0.4	0.147	2.04	2.36e-20	UP	Solid only	Solid_UP
p@chr2:48029795..48029799,+	2.4	0.000917	1.33	9.3e-06	2.04	8.38e-19	UP	Solid only	Solid_UP
p@chr4:174253309..174253371,-	2.39	4.9e-06	3.4	7.8e-40	2.05	3.88e-18	UP	Pan	Pan_UP
p@chr10:129906236..129906271,-	2.37	0.000336	4.09	1.56e-26	2.22	1.18e-19	UP	Pan	Pan_UP
p@chr11:70161808..70161813,+	2.32	0.00317	-0.54	0.125	2.35	2.96e-21	UP	Solid only	Solid_UP
p@chr5:10209600..10209602,-	2.32	8.06e-06	1.35	3.15e-05	2.3	1.55e-21	UP	Solid only	Solid_UP
p@chr8:74504114..74504117,-	2.3	0.00224	2.23	2.87e-09	2.42	8.59e-23	UP	Pan	Pan_UP
p@chr12:12317848..12317853,-	2.28	0.000305	2.42	2.69e-05	2.39	2.05e-25	UP	Pan	Pan_UP
p@chr17:55726463..55726519,+	2.27	0.000503	0.81	0.0419	2.51	4.14e-13	UP	Solid only	Solid_UP
p@chr11:27379000..27379016,-	2.27	0.000237	3.71	2.38e-19	2.25	1.47e-16	UP	Pan	Pan_UP
p@chr14:39648342..39648409,-	2.24	9.3e-14	1.72	4.23e-14	2.11	2.54e-35	UP	Solid only	Solid_UP
p@chr1:205687310..205687330,-	2.21	3.97e-05	2.36	5.57e-10	2.14	1.24e-27	UP	Pan	Pan_UP
p@chr1:147080146..147080150,+	2.21	0.00345	0.58	0.24	2.1	2.7e-11	UP	Solid only	Solid_UP
p@chr1:46072199..46072215,-	2.2	0.00398	2.81	1.21e-18	2.15	2.59e-21	UP	Pan	Pan_UP
p@chr2:44159259..44159263,-	2.2	9.13e-10	0.93	0.000163	2.48	1.93e-32	UP	Solid only	Solid_UP
p@chr10:129907365..129907387,-	2.2	0.00789	4.25	1.4e-30	2.18	2.31e-16	UP	Pan	Pan_UP
p@chr1:45769729..45769755,-	2.19	0.000157	1.25	0.000116	2.73	3.33e-25	UP	Solid only	Solid_UP
p@chr5:14308595..14308618,+	2.18	0.00333	3.7	2.32e-11	2.11	5.92e-14	UP	Pan	Pan_UP
p@chr10:34638501..34638509,-	2.16	0.000821	4.28	1.18e-08	2.44	3.69e-22	UP	Pan	Pan_UP
p@chr12:122908215..122908241,-	2.15	0.00756	1.04	0.0246	2.73	1.45e-24	UP	Solid only	Solid_UP
p@chr3:185383448..185383493,-	2.14	4.12e-06	3.48	2.16e-09	2.39	3.32e-27	UP	Pan	Pan_UP
p@chr11:6538915..6538920,+	2.13	2.77e-08	0.69	0.00818	2.2	5.82e-30	UP	Solid only	Solid_UP
p@chr3:38527183..38527189,+	2.11	0.00135	0.8	0.0341	2.77	1.14e-27	UP	Solid only	Solid_UP
p@chr4:1940167..1940171,+	2.1	5.58e-05	1.91	6.09e-11	2.04	1.02e-27	UP	Solid only	Solid_UP
p@chr11:118915152..118915173,-	2.09	1.02e-05	2.92	4.49e-12	2.82	1.13e-43	UP	Pan	Pan_UP
p@chr1:246218171..246218176,-	2.07	1.47e-07	1.46	5.96e-07	2.12	2.18e-17	UP	Solid only	Solid_UP
p@chr17:38552615..38552637,-	2.04	1.15e-05	4.46	7.78e-32	2.28	1.96e-18	UP	Pan	Pan_UP
p@chr2:25457124..25457149,-	2.01	0.00218	1.5	0.000278	2.03	1.05e-16	UP	Solid only	Solid_UP
p@chr5:150509066..150509091,-	-2.02	0.00416	-0.21	0.729	-2.04	2.34e-11	DOWN	Solid only	Solid_DOWN
p@chr19:1038526..1038570,+	-2.03	3.88e-10	-1.35	2.55e-07	-2.18	3.51e-25	DOWN	Solid only	Solid_DOWN
p@chr6:33281294..33281311,-	-2.05	0.00104	-2.43	2.71e-08	-2.23	4.51e-10	DOWN	Pan	Pan_DOWN
p@chr2:34606667..34606678,-	-2.21	3.12e-05	0.22	0.747	-2.02	1.35e-10	DOWN	Solid only	Solid_DOWN
p@chr5:93255834..93255839,-	-2.23	1.09e-05	0.14	0.876	-2.3	4.86e-18	DOWN	Solid only	Solid_DOWN
p@chr19:42070768..42070771,-	-2.23	7.96e-07	-1.84	4.5e-08	-2.36	1.09e-18	DOWN	Solid only	Solid_DOWN
p@chr6:36653695..36653733,+	-2.23	9.46e-06	-1.73	0.00287	-2.09	1.23e-14	DOWN	Solid only	Solid_DOWN
p@chr17:37824866..37824878,-	-2.3	0.0014	-0.27	0.651	-2.33	1.87e-16	DOWN	Solid only	Solid_DOWN
p@chr6:42508741..42508749,+	-2.32	1.09e-10	-0.55	0.116	-2.02	3.88e-25	DOWN	Solid only	Solid_DOWN
p@chr11:61605283..61605303,+	-2.32	0.00263	1.28	0.0301	-2.02	2.42e-13	DOWN	Solid only	Solid_DOWN
p@chr2:176543874..176543876,-	-2.37	3.5e-05	-0.38	0.552	-2.04	4.11e-10	DOWN	Solid only	Solid_DOWN
p@chr4:57897303..57897337,+	-2.39	0.00266	1.31	0.174	-2.58	1.48e-10	DOWN	Solid only	Solid_DOWN
p@chr2:216286951..216286963,-	-2.52	0.00112	-3.61	0.116	-2.27	1.46e-08	DOWN	Solid only	Solid_DOWN
p@chr2:216256377..216256419,-	-2.52	0.00175	-3.11	0.208	-2.29	4.4e-08	DOWN	Solid only	Solid_DOWN
p@chr2:216292925..216292962,+	-2.52	0.00118	-2.26	0.39	-2.03	6.25e-07	DOWN	Solid only	Solid_DOWN
p@chr10:13749173..13749231,-	-2.56	0.0004	1.68	0.131	-2.41	5.12e-08	DOWN	Solid only	Solid_DOWN
p@chr20:52189632..52189648,+	-2.62	0.00138	-1.04	0.0478	-2.08	1.92e-08	DOWN	Solid only	Solid_DOWN
p@chr1:10738540..10738541,+	-2.64	1.95e-05	-0.34	0.517	-2.66	5.18e-19	DOWN	Solid only	Solid_DOWN
p@chr5:151043071..151043166,-	-2.66	0.00414	-0.98	0.457	-2.31	3.13e-10	DOWN	Solid only	Solid_DOWN
p@chr2:216243869..216243940,+	-2.66	0.000378	-0.21	1	-2.14	4.81e-07	DOWN	Solid only	Solid_DOWN
p@chr2:216279570..216279641,+	-2.67	0.0013	-2.04	0.358	-2.06	1.63e-06	DOWN	Solid only	Solid_DOWN
p@chr2:216284048..216284059,-	-2.67	0.000505	0.2	1	-2.13	1.57e-07	DOWN	Solid only	Solid_DOWN
p@chr2:77780882..77780887,-	-2.76	0.00203	0.36	0.649	-2.78	1.65e-09	DOWN	Solid only	Solid_DOWN
p@chr17:48263831..48263873,-	-2.77	0.00219	-2.96	0.356	-2.1	8.63e-06	DOWN	Solid only	Solid_DOWN
p@chrX:38031247..38031276,-	-2.77	0.000738	2.35	0.374	-2.6	5.27e-11	DOWN	Solid only	Solid_DOWN
p@chr2:216271005..216271137,-	-2.8	0.000101	-2.02	0.172	-2.08	2.83e-07	DOWN	Solid only	Solid_DOWN
p@chr17:48261877..48261964,-	-2.82	0.00213	0.65	0.738	-2.25	3.31e-06	DOWN	Solid only	Solid_DOWN
p@chr22:43015260..43015272,-	-2.85	0.00125	1.81	0.00101	-2.2	1.62e-14	DOWN	Solid only	Solid_DOWN
p@chr2:216259354..216259419,+	-2.86	0.00012	-0.45	0.978	-2.07	1.57e-06	DOWN	Solid only	Solid_DOWN
p@chr2:173039278..173039279,+	-2.87	0.000117	-1.47	0.00593	-2.44	2.42e-10	DOWN	Solid only	Solid_DOWN
p@chr2:216271841..216271920,+	-2.89	0.000162	0.09	1	-2.29	3.37e-08	DOWN	Solid only	Solid_DOWN
p@chr2:216252958..216252995,+	-2.93	1.85e-05	1.01	0.7	-2.13	2.44e-06	DOWN	Solid only	Solid_DOWN
p@chr2:216269135..216269225,+	-2.95	1.45e-05	2.39	0.372	-2.41	8.1e-09	DOWN	Solid only	Solid_DOWN
p@chr2:216286835..216286854,-	-2.99	0.000134	-0.66	0.922	-2.01	7.64e-07	DOWN	Solid only	Solid_DOWN
p@chr2:216256489..216256512,+	-3.04	0.00126	2.28	0.381	-2.04	5.11e-06	DOWN	Solid only	Solid_DOWN
p@chr2:216274641..216274703,+	-3.04	8.02e-05	-0.96	0.661	-2.07	8.84e-07	DOWN	Solid only	Solid_DOWN
p@chr1:53586916..53586917,+	-3.04	0.00211	-1.9	0.00378	-2.36	1.21e-08	DOWN	Solid only	Solid_DOWN
p@chr2:216272860..216272923,-	-3.05	8.01e-06	0	1	-2.03	2.88e-07	DOWN	Solid only	Solid_DOWN
p@chr2:216269109..216269248,-	-3.07	1.61e-05	-2.05	0.202	-2.09	2.79e-07	DOWN	Solid only	Solid_DOWN
p@chr17:48261749..48261844,-	-3.09	0.00135	-0.17	1	-2.45	7.23e-07	DOWN	Solid only	Solid_DOWN
p@chr2:216296649..216296678,-	-3.14	2.83e-05	-2.04	0.152	-2.14	2.23e-07	DOWN	Solid only	Solid_DOWN
p@chr2:216269250..216269274,-	-3.14	5.48e-06	2.4	0.372	-2.12	3.91e-07	DOWN	Solid only	Solid_DOWN
p@chr2:216274786..216274797,+	-3.16	0.000285	0	1	-2.49	6.51e-09	DOWN	Solid only	Solid_DOWN
p@chr2:216295510..216295544,-	-3.17	2.64e-05	-5.14	0.0778	-2.08	4.35e-07	DOWN	Solid only	Solid_DOWN
p@chr2:216261906..216261920,-	-3.17	3.52e-05	0.38	0.974	-2.26	6.03e-08	DOWN	Solid only	Solid_DOWN
p@chr2:216286925..216286942,-	-3.18	1.56e-05	-3.99	0.0672	-2.29	7.6e-09	DOWN	Solid only	Solid_DOWN
p@chr4:57898595..57898604,+	-3.21	0.00553	2.09	0.179	-2.09	8.25e-07	DOWN	Solid only	Solid_DOWN
p@chr1:150482135..150482170,+	-3.23	0.000495	-0.25	0.99	-2.49	4.45e-12	DOWN	Solid only	Solid_DOWN
p@chr2:133038177..133038193,+	-3.28	3.21e-05	-1.08	0.0521	-2.76	1.34e-15	DOWN	Solid only	Solid_DOWN
p@chr5:168174596..168174598,-	-3.29	0.00166	0.68	0.32	-2.48	1.24e-10	DOWN	Solid only	Solid_DOWN
p@chr17:40556677..40556728,-	-3.3	4.38e-05	3.15	0.013	-2.06	2.56e-14	DOWN	Solid only	Solid_DOWN
p@chr12:124421797..124421825,-	-3.32	6.81e-05	-1.15	0.111	-2.45	2.31e-13	DOWN	Solid only	Solid_DOWN
p@chr16:27325702..27325750,-	-3.34	7.71e-08	-3.57	2.62e-15	-3.31	5.73e-18	DOWN	Pan	Pan_DOWN
p@chr5:172261157..172261174,-	-3.39	0.00016	-5.59	3.48e-20	-4.54	3.99e-28	DOWN	Pan	Pan_DOWN
p@chr2:216270984..216271000,-	-3.4	8.86e-05	-3.59	0.119	-2.65	6.1e-10	DOWN	Solid only	Solid_DOWN
p@chr2:216269285..216269305,-	-3.46	4.53e-05	0	1	-2.26	6.95e-08	DOWN	Solid only	Solid_DOWN
p@chr12:57556203..57556225,+	-3.46	0.000554	-7.85	4.27e-08	-2.42	1.53e-13	DOWN	Pan	Pan_DOWN
p@chr2:216251438..216251451,-	-3.47	4.88e-06	-2.26	0.39	-2.47	4.67e-08	DOWN	Solid only	Solid_DOWN
p@chr6:45660927..45660931,-	-3.5	2.76e-05	-0.18	0.892	-2.03	8.22e-09	DOWN	Solid only	Solid_DOWN
p@chr9:130605459..130605479,-	-3.51	0.00129	0.18	0.918	-3.07	2.27e-18	DOWN	Solid only	Solid_DOWN
p@chr8:136046260..136046262,-	-3.54	6.98e-11	0.6	0.487	-2.38	9.29e-15	DOWN	Solid only	Solid_DOWN
p@chr9:130582222..130582259,-	-3.56	0.00517	0.36	0.7	-3.3	8.08e-18	DOWN	Solid only	Solid_DOWN
p@chr8:29107572..29107608,-	-3.65	0.00281	-2.39	0.0127	-2.2	3.21e-06	DOWN	Solid only	Solid_DOWN
p@chr2:216246957..216246989,+	-3.66	8.78e-06	2.4	0.372	-2.02	4.43e-06	DOWN	Solid only	Solid_DOWN
p@chr2:216285392..216285435,+	-3.69	7.42e-07	0.09	1	-2.02	2.54e-07	DOWN	Solid only	Solid_DOWN
p@chr17:48263775..48263804,-	-3.7	0.000119	1.35	0.61	-2.74	6.99e-09	DOWN	Solid only	Solid_DOWN
p@chr9:130580482..130580516,-	-3.75	0.000472	0.62	0.522	-3.52	2.28e-21	DOWN	Solid only	Solid_DOWN
p@chr6:36654379..36654413,+	-3.77	1.93e-06	-1.93	0.00383	-2.32	1.18e-14	DOWN	Solid only	Solid_DOWN
p@chr2:216269309..216269333,-	-3.78	5.63e-05	-3.59	0.119	-2.12	4.51e-08	DOWN	Solid only	Solid_DOWN
p@chr2:216226780..216226807,-	-3.79	1.19e-05	-2.26	0.39	-2.21	2.86e-07	DOWN	Solid only	Solid_DOWN
p@chr6:36653890..36653913,+	-3.84	2.9e-06	-0.94	0.242	-2.26	2.44e-15	DOWN	Solid only	Solid_DOWN
p@chr10:124248410..124248428,+	-3.94	0.000237	-3.12	0.206	-2.69	1.1e-10	DOWN	Solid only	Solid_DOWN
p@chr2:216259325..216259350,+	-3.98	0.000141	0.14	1	-2.09	2.67e-06	DOWN	Solid only	Solid_DOWN
p@chr4:185115757..185115759,+	-4.06	0.00109	-0.49	0.636	-2.4	2.78e-08	DOWN	Solid only	Solid_DOWN
p@chr13:111561816..111561819,-	-4.14	0.000886	-1.09	0.158	-2.83	6.08e-08	DOWN	Solid only	Solid_DOWN
p@chr2:216288145..216288156,-	-4.17	1.62e-06	-2.27	0.39	-2.22	9.47e-09	DOWN	Solid only	Solid_DOWN
p@chrX:152771465..152771514,-	-4.18	0.00168	0	1	-2.07	3.52e-05	DOWN	Solid only	Solid_DOWN
p@chr12:54797500..54797522,-	-4.29	9.47e-06	0.19	0.95	-2.55	9.32e-14	DOWN	Solid only	Solid_DOWN
p@chr2:216261849..216261862,+	-4.29	0.000314	0	1	-2.41	3.43e-07	DOWN	Solid only	Solid_DOWN
p@chr11:57367546..57367628,-	-4.41	1.48e-07	-0.02	1	-2.4	9.97e-09	DOWN	Solid only	Solid_DOWN
p@chr19:53561383..53561386,-	-4.52	0.00133	-1.58	0.0131	-2.94	1.37e-12	DOWN	Solid only	Solid_DOWN
p@chr17:48262548..48262561,-	-4.57	1.46e-05	0.05	1	-3.38	3.8e-11	DOWN	Solid only	Solid_DOWN
p@chr12:93835245..93835248,+	-4.91	0.00897	-1.44	0.0795	-3.06	8.22e-08	DOWN	Solid only	Solid_DOWN
p@chr2:216288096..216288100,-	-4.93	0.000381	0	1	-2.25	3.04e-06	DOWN	Solid only	Solid_DOWN
p@chr2:216248830..216248863,+	-5	1.12e-07	0	1	-2.13	1.63e-06	DOWN	Solid only	Solid_DOWN

## Sheet: ON OFF
Supplementary table 2B. Results of promoter level ON and OFF analysis by Fisher's exact test.
	Frequencies of expression in cancer			Frequencies of expression in normal			matched solid	matched blood	unmatched solid
promoter	matched solid	matched blood	unmatched solid	matched solid	matched blood	unmatched solid	BH adj p-value	BH adj p-value	BH adj p-value	type	type1	summary
p3@PRAME	0.375	0.373	0.431	0	0	0.02	7.44573e-07	1.65759e-07	3.11064e-17	ON	Pan	Pan_ON
p1@LINC00355	0.361	0.412	0.382	0	0.014	0.01	1.44159e-06	2.21213e-07	2.31636e-16	ON	Pan	Pan_ON
p5@PRAME	0.333	0.333	0.343	0	0	0.01	5.35267e-06	1.18637e-06	2.47043e-14	ON	Pan	Pan_ON
p8@FGF13	0.292	0.137	0.314	0	0	0.005	3.44344e-05	0.00843582	8.00705e-14	ON	Pan	Pan_ON
p2@LINC00355	0.292	0.412	0.363	0	0.041	0.005	3.44344e-05	5.87522e-06	2.33151e-16	ON	Pan	Pan_ON
p1@CCDC144NL	0.278	0.255	0.284	0	0	0	6.24826e-05	5.14978e-05	1.58054e-13	ON	Pan	Pan_ON
p1@AK097618	0.264	0.255	0.284	0	0	0.07	0.000114494	5.14978e-05	1.41601e-05	ON	Pan	Pan_ON
p4@PRAME	0.25	0.275	0.245	0	0	0.01	0.000208808	2.03683e-05	1.38679e-09	ON	Pan	Pan_ON
p1@BAGE2	0.25	0.216	0.216	0	0	0.015	0.000208808	0.000292888	1.4959e-07	ON	Pan	Pan_ON
p1@ENST00000412295	0.25	0.196	0.402	0	0	0.025	0.000208808	0.000705251	6.21534e-15	ON	Pan	Pan_ON
p2@FLJ46257	0.25	0.059	0.304	0	0	0.01	0.000208808	0.189856	2.17711e-12	ON	Solid only	Solid_ON
p10@SNHG1	0.25	0.412	0.186	0	0.068	0.02	0.000208808	0.000110351	9.60372e-06	ON	Pan	Pan_ON
p3@AKR1B10	0.25	0	0.088	0	0.014	0.01	0.000208808	1	0.00606581	ON	Solid only	Solid_ON
p1@MAGEC1	0.236	0.255	0.255	0	0	0.025	0.000384169	5.14978e-05	4.48207e-08	ON	Pan	Pan_ON
p1@MAGEC2	0.236	0.157	0.324	0	0	0.06	0.000384169	0.00379427	1.20483e-07	ON	Pan	Pan_ON
p1@ENST00000426413,p1@ENST00000431071	0.236	0.137	0.265	0	0.027	0.01	0.000384169	0.104285	1.67672e-10	ON	Solid only	Solid_ON
p1@EU250752	0.236	0.294	0.196	0	0.108	0.005	0.000384169	0.042986	3.67531e-08	ON	Solid only	Solid_ON
p4@KIAA0232	0.236	0.235	0.127	0	0.122	0.02	0.000384169	0.356783	0.00160579	ON	Solid only	Solid_ON
p6@PRAME	0.222	0.235	0.324	0	0	0.02	0.000696221	0.000122719	8.52202e-12	ON	Pan	Pan_ON
p1@AK098733	0.222	0.157	0.206	0	0	0.03	0.000696221	0.00379427	1.38649e-05	ON	Pan	Pan_ON
p1@ENST00000546852,p2@ENST00000548329	0.222	0.118	0.225	0	0	0.005	0.000696221	0.0189529	1.59058e-09	ON	Solid only	Solid_ON
p1@ENST00000505347	0.222	0.059	0.235	0	0	0.01	0.000696221	0.189856	3.95113e-09	ON	Solid only	Solid_ON
p7@CSMD1	0.208	0.137	0.157	0	0	0.03	0.00123901	0.00843582	0.00124077	ON	Pan	Pan_ON
p1@TAG	0.208	0.118	0.255	0	0	0.02	0.00123901	0.0189529	1.18955e-08	ON	Solid only	Solid_ON
p1@MUC5AC	0.208	0	0.206	0	0	0.045	0.00123901	1	0.000190377	ON	Solid only	Solid_ON
p7@SYT1	0.194	0.078	0.245	0	0	0	0.00218712	0.0902601	1.41158e-11	ON	Solid only	Solid_ON
p4@ENST00000473958	0.194	0.137	0.216	0	0.014	0.04	0.00218712	0.0345876	5.36478e-05	ON	Solid only	Solid_ON
p1@COX7B2	0.194	0.078	0.127	0	0.014	0.005	0.00218712	0.37653	4.37113e-05	ON	Solid only	Solid_ON
p1@LINC00494	0.194	0.294	0.196	0	0.23	0.04	0.00218712	0.871591	0.000215248	ON	Solid only	Solid_ON
p1@OR51B5,p2@HBE1	0.486	0.235	0.431	0.015	0	0.01	3.01641e-08	0.000122719	4.65413e-19	ON	Pan	Pan_ON
p2@BC040238	0.181	0.235	0.245	0	0	0.005	0.00389653	0.000122719	1.86106e-10	ON	Pan	Pan_ON
p2@PRAME	0.181	0.196	0.235	0	0	0.015	0.00389653	0.000705251	2.02691e-08	ON	Pan	Pan_ON
p3@MAGEA1	0.181	0.176	0.186	0	0	0	0.00389653	0.00163962	9.89753e-09	ON	Pan	Pan_ON
p2@MAGEA1	0.181	0.157	0.167	0	0	0	0.00389653	0.00379427	8.37787e-08	ON	Pan	Pan_ON
p2@ENST00000505347	0.181	0.039	0.235	0	0	0.005	0.00389653	0.37653	5.43484e-10	ON	Solid only	Solid_ON
p3@ENST00000424322	0.181	0.02	0.176	0	0	0.005	0.00389653	0.715385	2.9022e-07	ON	Solid only	Solid_ON
p1@uc002fft.1	0.181	0.333	0.167	0	0.108	0.005	0.00389653	0.0150746	8.10528e-07	ON	Solid only	Solid_ON
p20@PACSIN2	0.181	0	0.127	0	0.054	0.015	0.00389653	0.356783	0.000612088	ON	Solid only	Solid_ON
p1@ENST00000426452,p2@uc003bij.2,p2@uc003bik.1	0.458	0.216	0.608	0.015	0	0.03	1.37951e-07	0.000292888	3.91805e-26	ON	Pan	Pan_ON
p2@DDN	0.167	0.294	0.196	0	0	0.01	0.00683144	7.92196e-06	2.30922e-07	ON	Pan	Pan_ON
p6@KSR2	0.167	0.176	0.255	0	0	0.02	0.00683144	0.00163962	1.18955e-08	ON	Pan	Pan_ON
p1@CT45A5	0.167	0.137	0.127	0	0	0	0.00683144	0.00843582	5.69527e-06	ON	Pan	Pan_ON
p2@LINC00221	0.167	0.118	0.176	0	0	0.005	0.00683144	0.0189529	2.9022e-07	ON	Solid only	Solid_ON
p2@ENST00000503107,p2@ENST00000505775,p2@ENST00000514844	0.167	0.196	0.147	0	0.014	0	0.00683144	0.00379427	7.00249e-07	ON	Pan	Pan_ON
p1@BAGE3,p1@BAGE4,p1@BAGE5,p1@BAGE,p2@BAGE2	0.167	0.176	0.196	0	0.014	0.005	0.00683144	0.00811506	3.67531e-08	ON	Pan	Pan_ON
p2@NKX2-4	0.167	0.059	0.108	0	0	0	0.00683144	0.189856	4.46098e-05	ON	Solid only	Solid_ON
p8@PRTG	0.167	0.059	0.176	0	0	0.005	0.00683144	0.189856	2.9022e-07	ON	Solid only	Solid_ON
p2@CDH7	0.167	0.02	0.098	0	0	0	0.00683144	0.715385	0.000123219	ON	Solid only	Solid_ON
p14@GCNT2	0.167	0.02	0.108	0	0	0	0.00683144	0.715385	4.46098e-05	ON	Solid only	Solid_ON
p9@ZNF704	0.167	0.02	0.098	0	0	0.015	0.00683144	0.715385	0.00690614	ON	Solid only	Solid_ON
p3@ARMC3	0.167	0	0.147	0	0	0.005	0.00683144	1	6.05566e-06	ON	Solid only	Solid_ON
p5@PRDX1	0.167	0	0.196	0	0	0.03	0.00683144	1	3.26814e-05	ON	Solid only	Solid_ON
p3@ENST00000366172,p3@uc002pdz.1	0.167	0	0.147	0	0	0.005	0.00683144	1	6.05566e-06	ON	Solid only	Solid_ON
p3@uc004aus.1	0.417	0.078	0.451	0.015	0	0.025	1.26502e-06	0.0902601	1.68947e-17	ON	Solid only	Solid_ON
p3@uc003bij.2,p3@uc003bik.1	0.403	0.196	0.5	0.015	0	0.06	2.61584e-06	0.000705251	9.91736e-16	ON	Pan	Pan_ON
p8@PPP2R2C	0.389	0.02	0.245	0.015	0	0.025	5.05393e-06	0.715385	1.18063e-07	ON	Solid only	Solid_ON
p9@FER	0.375	0.627	0.304	0.015	0.027	0.015	9.61612e-06	7.06958e-12	1.40062e-11	ON	Pan	Pan_ON
p2@PARP16	0.375	0.686	0.422	0.015	0.689	0.09	9.61612e-06	1	2.15749e-09	ON	Solid only	Solid_ON
p1@ENST00000439794	0.347	0.196	0.324	0.015	0	0.03	2.16133e-05	0.000705251	1.57768e-10	ON	Pan	Pan_ON
p9@TP73	0.347	0.451	0.363	0.015	0.027	0.035	2.16133e-05	1.90078e-07	9.08747e-12	ON	Pan	Pan_ON
p2@ENST00000439794	0.319	0.216	0.284	0.015	0	0.01	7.15057e-05	0.000292888	1.93837e-11	ON	Pan	Pan_ON
p12@CPEB1	0.319	0.098	0.167	0.015	0	0.025	7.15057e-05	0.0419484	0.000156311	ON	Solid only	Solid_ON
p2@ENST00000511431	0.306	0.078	0.343	0.015	0	0.07	0.000128473	0.0902601	9.12584e-08	ON	Solid only	Solid_ON
p2@DLX4	0.5	0.412	0.588	0.031	0.014	0.11	9.3258e-08	2.21213e-07	1.56451e-15	ON	Pan	Pan_ON
p1@AB463753	0.292	0.098	0.275	0.015	0	0.035	0.000229491	0.0419484	7.04675e-08	ON	Solid only	Solid_ON
p1@TERT	0.653	0.902	0.588	0.046	0.189	0.025	7.17638e-11	2.60352e-13	1.08287e-25	ON	Pan	Pan_ON
p3@EPHA10	0.472	0.118	0.598	0.031	0.041	0.015	4.0998e-07	0.37653	3.20762e-28	ON	Solid only	Solid_ON
p1@ENST00000483525,p1@uc003dog.2	0.278	0.235	0.225	0.015	0	0.045	0.000407864	0.000122719	4.38394e-05	ON	Pan	Pan_ON
p2@ENST00000424322	0.278	0.039	0.255	0.015	0	0.01	0.000407864	0.37653	4.84347e-10	ON	Solid only	Solid_ON
p1@ENST00000548687,p1@ENST00000549460,p1@uc001svz.2	0.278	0.431	0.343	0.015	0.081	0.04	0.000407864	8.72229e-05	2.48715e-10	ON	Pan	Pan_ON
p1@TLX2	0.278	0.098	0.314	0.015	0.095	0.07	0.000407864	1	1.51158e-06	ON	Solid only	Solid_ON
p1@ENST00000508149	0.264	0.314	0.196	0.015	0	0.015	0.000714649	3.119e-06	1.04445e-06	ON	Pan	Pan_ON
p2@HOXD13	0.264	0.078	0.294	0.015	0	0.03	0.000714649	0.0902601	3.2132e-09	ON	Solid only	Solid_ON
p1@ENST00000503650	0.264	0.196	0.255	0.015	0.014	0.025	0.000714649	0.00379427	4.48207e-08	ON	Pan	Pan_ON
p6@PCLO	0.264	0.02	0.245	0.015	0.014	0.01	0.000714649	1	1.38679e-09	ON	Solid only	Solid_ON
p5@MYO15B	0.264	0.039	0.147	0.015	0.041	0.03	0.000714649	1	0.002347	ON	Solid only	Solid_ON
p5@SYCP2	0.264	0.098	0.275	0.015	0.27	0.05	0.000714649	0.0823566	1.90662e-06	ON	Solid only	Solid_ON
p3@RINT1	0.264	0.549	0.324	0.015	0.757	0.08	0.000714649	0.0750537	3.41524e-06	ON	Solid only	Solid_ON
p2@LOC286467	0.431	0.49	0.412	0.031	0.041	0.05	3.30096e-06	1.28789e-07	1.92064e-12	ON	Pan	Pan_ON
p5@NR6A1	0.25	0.255	0.392	0.015	0.068	0.025	0.00125897	0.0214112	1.94802e-14	ON	Solid only	Solid_ON
p2@C21orf90	0.403	0.275	0.373	0.031	0.014	0.05	1.17475e-05	0.000141111	1.1899e-10	ON	Pan	Pan_ON
p1@BC040238	0.236	0.314	0.373	0.015	0	0.005	0.00218712	3.119e-06	6.76635e-17	ON	Pan	Pan_ON
p9@FAM117A	0.236	0.392	0.353	0.015	0.041	0.02	0.00218712	1.45911e-05	3.3204e-13	ON	Pan	Pan_ON
p10@SMAP1	0.236	0.235	0.265	0.015	0.041	0.02	0.00218712	0.00859904	4.38958e-09	ON	Pan	Pan_ON
p19@SERP1	0.236	0.412	0.245	0.015	0.122	0.055	0.00218712	0.002087	5.74828e-05	ON	Solid only	Solid_ON
p1@ENST00000449749	0.236	0.098	0.265	0.015	0.054	0.055	0.00218712	0.822143	7.50018e-06	ON	Solid only	Solid_ON
p1@LHX4	0.389	0.157	0.363	0.031	0.054	0.04	2.31372e-05	0.196424	3.26945e-11	ON	Solid only	Solid_ON
p1@uc004aus.1	0.667	0.196	0.657	0.062	0	0.05	1.37564e-10	0.000705251	2.55325e-26	ON	Pan	Pan_ON
p1@SMPD4P1	0.222	0.255	0.265	0.015	0	0.01	0.00381773	5.14978e-05	1.67672e-10	ON	Pan	Pan_ON
p1@LIN28B	0.222	0.392	0.275	0.015	0.027	0.01	0.00381773	3.43776e-06	5.76613e-11	ON	Pan	Pan_ON
p13@FAM125A	0.222	0.431	0.167	0.015	0.122	0.03	0.00381773	0.00108412	0.000377933	ON	Solid only	Solid_ON
p2@ENST00000490162	0.222	0.098	0.157	0.015	0.054	0.025	0.00381773	0.822143	0.000353537	ON	Solid only	Solid_ON
p2@BC043357	0.5	0.157	0.422	0.046	0	0.05	4.73342e-07	0.00379427	6.69815e-13	ON	Pan	Pan_ON
p6@PCK2	0.361	0.255	0.51	0.031	0.027	0.005	7.88082e-05	0.0013282	7.23062e-25	ON	Pan	Pan_ON
p1@HMX3	0.208	0.353	0.167	0.015	0	0.015	0.00645597	4.43031e-07	1.77038e-05	ON	Pan	Pan_ON
p3@DLX4	0.208	0.235	0.324	0.015	0	0.05	0.00645597	0.000122719	1.48296e-08	ON	Pan	Pan_ON
p4@VANGL1	0.208	0.235	0.176	0.015	0	0.02	0.00645597	0.000122719	2.35702e-05	ON	Pan	Pan_ON
p1@ENST00000436263	0.208	0.118	0.373	0.015	0	0	0.00645597	0.0189529	3.49396e-18	ON	Solid only	Solid_ON
p1@PHF2P1	0.208	0.118	0.235	0.015	0	0.01	0.00645597	0.0189529	3.95113e-09	ON	Solid only	Solid_ON
p3@YBX2	0.208	0.078	0.275	0.015	0	0.03	0.00645597	0.0902601	2.23423e-08	ON	Solid only	Solid_ON
p3@TMEM116	0.208	0.294	0.304	0.015	0.027	0.03	0.00645597	0.000268655	1.18338e-09	ON	Pan	Pan_ON
p4@EPHA6	0.208	0.059	0.196	0.015	0	0.015	0.00645597	0.189856	1.04445e-06	ON	Solid only	Solid_ON
p1@HOXD13	0.208	0.039	0.275	0.015	0	0.03	0.00645597	0.37653	2.23423e-08	ON	Solid only	Solid_ON
p1@ENST00000548895	0.208	0.137	0.157	0.015	0.068	0.015	0.00645597	0.493989	4.42534e-05	ON	Solid only	Solid_ON
p2@uc004aut.1,p2@uc004auu.2	0.208	0	0.284	0.015	0	0.01	0.00645597	1	1.93837e-11	ON	Solid only	Solid_ON
p8@FER	0.347	0.804	0.265	0.031	0.284	0.055	0.000145777	3.5202e-07	7.50018e-06	ON	Solid only	Solid_ON
p3@ENST00000513853	0.347	0	0.186	0.031	0	0.03	0.000145777	1	7.57579e-05	ON	Solid only	Solid_ON
p5@PASK	0.611	0.49	0.706	0.062	0.405	0.11	7.5147e-09	0.715385	1.66038e-22	ON	Solid only	Solid_ON
p1@uc003wne.1	0.472	0.196	0.529	0.046	0	0.01	1.90221e-06	0.000705251	6.91594e-25	ON	Pan	Pan_ON
p1@LOC100289211	0.333	0.412	0.461	0.031	0.027	0.055	0.000265547	1.33918e-06	2.84011e-14	ON	Pan	Pan_ON
p1@uc003bij.2,p1@uc003bik.1	0.444	0.275	0.578	0.046	0	0.04	6.79726e-06	2.03683e-05	1.23675e-22	ON	Pan	Pan_ON
p2@CSAG1	0.319	0.216	0.324	0.031	0	0.03	0.000483412	0.000292888	1.57768e-10	ON	Pan	Pan_ON
p25@LRRC8D	0.319	0.412	0.333	0.031	0.027	0.05	0.000483412	1.33918e-06	5.79981e-09	ON	Pan	Pan_ON
p4@FCHSD1	0.319	0.275	0.324	0.031	0.027	0.02	0.000483412	0.000607752	8.52202e-12	ON	Pan	Pan_ON
p1@CCNYL2	0.556	0.275	0.343	0.062	0.014	0.045	1.07882e-07	0.000141111	7.74539e-10	ON	Pan	Pan_ON
p1@ENST00000424322	0.306	0.118	0.265	0.031	0	0.01	0.000859257	0.0189529	1.67672e-10	ON	Solid only	Solid_ON
p1@ENST00000511431	0.306	0.098	0.373	0.031	0	0.08	0.000859257	0.0419484	4.18657e-08	ON	Solid only	Solid_ON
p3@MNX1	0.306	0.137	0.441	0.031	0.014	0.01	0.000859257	0.0345876	1.29977e-19	ON	Solid only	Solid_ON
p6@TP73	0.389	0.51	0.402	0.046	0.068	0.03	8.38495e-05	8.21316e-07	2.96506e-14	ON	Pan	Pan_ON
p8@CHN2	0.389	0.255	0.49	0.046	0.432	0.095	8.38495e-05	0.177366	4.54827e-12	ON	Solid only	Solid_ON
p20@RBM25	0.389	0.294	0.382	0.046	0.554	0.08	8.38495e-05	0.0271958	2.00141e-08	ON	Solid only	Solid_ON
p3@TP73	0.5	0.51	0.461	0.062	0.135	0.025	1.90505e-06	0.000108002	4.78193e-18	ON	Solid only	Solid_ON
p3@LIN28B	0.278	0.373	0.333	0.031	0	0.025	0.00162216	1.65759e-07	1.36853e-11	ON	Pan	Pan_ON
p3@uc002snv.3	0.278	0.216	0.422	0.031	0	0.01	0.00162216	0.000292888	1.70377e-18	ON	Pan	Pan_ON
p5@GLP2R	0.278	0	0.118	0.031	0.027	0.015	0.00162216	0.846204	0.00140963	ON	Solid only	Solid_ON
p1@CSAG1	0.375	0.235	0.353	0.046	0	0.02	0.000153974	0.000122719	3.3204e-13	ON	Pan	Pan_ON
p3@RTBDN	0.375	0.176	0.461	0.046	0	0.01	0.000153974	0.00163962	9.7799e-21	ON	Pan	Pan_ON
p4@TP73	0.472	0.588	0.422	0.062	0.068	0.03	6.79726e-06	1.91568e-08	3.0092e-15	ON	Pan	Pan_ON
p1@uc002snv.3	0.472	0.255	0.52	0.062	0.054	0.085	6.79726e-06	0.0136018	2.62098e-14	ON	Solid only	Solid_ON
p1@PDX1	0.264	0.118	0.304	0.031	0.014	0.015	0.00275041	0.0689176	1.40062e-11	ON	Solid only	Solid_ON
p1@ENST00000444871	0.264	0.039	0.294	0.031	0	0.05	0.00275041	0.37653	2.30373e-07	ON	Solid only	Solid_ON
p4@PRTG	0.264	0.039	0.235	0.031	0	0.045	0.00275041	0.37653	2.09567e-05	ON	Solid only	Solid_ON
p1@SCARNA14	0.264	0.176	0.225	0.031	0.068	0.035	0.00275041	0.224265	6.44688e-06	ON	Solid only	Solid_ON
p20@NADK	0.264	0.02	0.167	0.031	0.027	0.015	0.00275041	1	1.77038e-05	ON	Solid only	Solid_ON
p24@UGDH	0.361	0.078	0.402	0.046	0	0.095	0.000276972	0.0902601	3.35966e-08	ON	Solid only	Solid_ON
p2@TP73	0.556	0.569	0.52	0.077	0.23	0.075	6.48822e-07	0.00132707	3.15258e-15	ON	Solid only	Solid_ON
p7@CCNE2	0.458	0.431	0.471	0.062	0.027	0.095	1.28642e-05	5.07765e-07	3.30443e-11	ON	Pan	Pan_ON
p1@KCNG3	0.653	0.176	0.598	0.092	0.176	0.1	8.81446e-09	1	4.98683e-17	ON	Pan	Pan_ON
p7@ADAMTS16	0.347	0.039	0.235	0.046	0	0.03	0.000492501	0.37653	9.58293e-07	ON	Solid only	Solid_ON
p9@CUX1	0.347	0.059	0.225	0.046	0.027	0.055	0.000492501	0.715385	0.000206586	ON	Solid only	Solid_ON
p6@FBXL16	0.347	0.235	0.382	0.046	0.297	0.065	0.000492501	0.885041	9.3021e-10	ON	Solid only	Solid_ON
p1@TP73	0.639	0.667	0.618	0.092	0.243	0.1	1.86387e-08	5.14978e-05	4.20553e-18	ON	Solid only	Solid_ON
p2@ENST00000442996,p2@uc002uiw.2	0.25	0.235	0.343	0.031	0	0.025	0.00465171	0.000122719	4.71669e-12	ON	Pan	Pan_ON
p1@ALPPL2	0.25	0.078	0.412	0.031	0	0.015	0.00465171	0.0902601	5.00747e-17	ON	Solid only	Solid_ON
p4@ENST00000499196,p4@uc003oci.1	0.25	0.176	0.353	0.031	0.027	0.03	0.00465171	0.0326248	6.80677e-12	ON	Solid only	Solid_ON
p1@ENST00000490162	0.444	0.196	0.422	0.062	0.054	0.095	2.46214e-05	0.0737289	4.03088e-09	ON	Solid only	Solid_ON
p1@LOC100129112	0.444	0.431	0.431	0.062	0.243	0.1	2.46214e-05	0.10966	5.16157e-09	ON	Solid only	Solid_ON
p8@GATA2	0.333	0.137	0.275	0.046	0.027	0.065	0.000860459	0.104285	1.67833e-05	ON	Solid only	Solid_ON
p10@PPP2R2C	0.431	0	0.275	0.062	0	0.045	4.49287e-05	1	5.3545e-07	ON	Solid only	Solid_ON
p2@LIN28B	0.236	0.431	0.275	0.031	0	0.025	0.00773749	7.48694e-09	6.38439e-09	ON	Pan	Pan_ON
p1@ENST00000548329	0.236	0.118	0.216	0.031	0	0.005	0.00773749	0.0189529	4.55965e-09	ON	Solid only	Solid_ON
p1@MAGEA12	0.236	0.216	0.265	0.031	0.014	0.01	0.00773749	0.00169902	1.67672e-10	ON	Pan	Pan_ON
p1@ENST00000438342	0.236	0.196	0.216	0.031	0.014	0.04	0.00773749	0.00379427	5.36478e-05	ON	Pan	Pan_ON
p15@EEF1A2	0.236	0.098	0.245	0.031	0.014	0.01	0.00773749	0.1314	1.38679e-09	ON	Solid only	Solid_ON
p2@ENST00000453348	0.236	0.333	0.245	0.031	0.122	0.02	0.00773749	0.0299161	3.21051e-08	ON	Solid only	Solid_ON
p2@CDX2	0.236	0.098	0.343	0.031	0.054	0.04	0.00773749	0.822143	2.48715e-10	ON	Solid only	Solid_ON
p13@NEDD4	0.236	0	0.196	0.031	0	0.025	0.00773749	1	1.19086e-05	ON	Solid only	Solid_ON
p19@AKAP9	0.236	0.118	0.157	0.031	0.122	0.035	0.00773749	1	0.0019646	ON	Solid only	Solid_ON
p2@ENST00000525757,p2@uc001pyv.1	0.236	0.098	0.176	0.031	0.23	0.01	0.00773749	0.249132	1.67878e-06	ON	Solid only	Solid_ON
p4@ISL2	0.319	0.275	0.441	0.046	0.014	0.08	0.00150745	0.000141111	6.05422e-11	ON	Pan	Pan_ON
p16@NADKD1	0.319	0.353	0.275	0.046	0.041	0.065	0.00150745	0.000127192	1.67833e-05	ON	Pan	Pan_ON
p5@PPP2R2C	0.319	0.02	0.206	0.046	0.014	0.02	0.00150745	1	1.51597e-06	ON	Solid only	Solid_ON
p1@ENST00000422048,p1@uc004dbt.2	0.667	0.275	0.569	0.108	0.014	0.13	1.24314e-08	0.000141111	5.11204e-13	ON	Pan	Pan_ON
p25@PABPC1	0.403	0.569	0.422	0.062	0.419	0.085	0.000147146	0.27933	7.62075e-10	ON	Solid only	Solid_ON
p1@EPHA10	0.569	0.235	0.588	0.092	0.122	0.045	1.03885e-06	0.356783	1.54927e-22	ON	Solid only	Solid_ON
p6@VEPH1	0.306	0	0.255	0.046	0	0.06	0.00260022	1	4.27884e-05	ON	Solid only	Solid_ON
p1@ENST00000555032	0.306	0.216	0.363	0.046	0.446	0.065	0.00260022	0.051273	8.88175e-09	ON	Solid only	Solid_ON
p2@PPP2R2C	0.556	0.078	0.382	0.092	0.014	0.095	2.14194e-06	0.37653	1.51958e-07	ON	Solid only	Solid_ON
p4@FER	0.556	0.902	0.549	0.092	0.392	0.09	2.14194e-06	1.70297e-07	2.44635e-15	ON	Solid only	Solid_ON
p6@WDR74	0.556	0.608	0.559	0.092	0.27	0.135	2.14194e-06	0.00169902	2.54479e-12	ON	Solid only	Solid_ON
p5@C9orf86	0.389	0.157	0.392	0.062	0.203	0.08	0.000262154	1	5.32008e-09	ON	Solid only	Solid_ON
p3@RPS19BP1	0.472	0.608	0.529	0.077	0.135	0.075	2.25012e-05	1.76478e-06	9.91736e-16	ON	Pan	Pan_ON
p1@ENST00000418244,p1@ENST00000449386	0.708	0.216	0.667	0.123	0.027	0.045	3.25763e-09	0.00919215	1.19937e-27	ON	Pan	Pan_ON
p2@uc002snv.3	0.292	0.235	0.431	0.046	0	0.025	0.00445251	0.000122719	1.86959e-16	ON	Pan	Pan_ON
p17@EEF1A2	0.292	0.039	0.196	0.046	0	0.025	0.00445251	0.37653	1.19086e-05	ON	Solid only	Solid_ON
p4@C9orf86	0.292	0.157	0.324	0.046	0.095	0.08	0.00445251	0.715385	3.41524e-06	ON	Solid only	Solid_ON
p11@CLIP4	0.458	0.098	0.353	0.077	0.054	0.06	4.09095e-05	0.822143	6.19252e-09	ON	Solid only	Solid_ON
p3@PPP2R2C	0.458	0.02	0.333	0.077	0.014	0.03	4.09095e-05	1	5.62013e-11	ON	Solid only	Solid_ON
p3@C21orf90	0.375	0.294	0.402	0.062	0	0.015	0.000468158	7.92196e-06	1.73403e-16	ON	Pan	Pan_ON
p3@DLX6	0.528	0.137	0.588	0.092	0	0.09	8.27909e-06	0.00843582	2.08144e-17	ON	Pan	Pan_ON
p3@POLQ	0.444	0.627	0.48	0.077	0.068	0.105	7.48616e-05	1.23002e-09	7.09337e-11	ON	Pan	Pan_ON
p4@ICAM5	0.361	0.275	0.392	0.062	0	0.025	0.000816681	2.03683e-05	1.94802e-14	ON	Pan	Pan_ON
p12@FZD5	0.361	0.157	0.294	0.062	0	0.035	0.000816681	0.00379427	1.0497e-08	ON	Pan	Pan_ON
p1@ENST00000437317	0.361	0.02	0.294	0.062	0	0.005	0.000816681	0.715385	7.61542e-13	ON	Solid only	Solid_ON
p4@SPG11	0.361	0.373	0.343	0.062	0.324	0.07	0.000816681	1	9.12584e-08	ON	Solid only	Solid_ON
p1@HIST1H2BA	0.278	0.255	0.343	0.046	0	0.025	0.0074589	5.14978e-05	4.71669e-12	ON	Pan	Pan_ON
p2@ENST00000379355,p2@uc002pec.2	0.278	0.039	0.324	0.046	0	0.065	0.0074589	0.37653	2.3769e-07	ON	Solid only	Solid_ON
p1@DNAAF1	0.278	0.059	0.343	0.046	0.014	0.025	0.0074589	0.613325	4.71669e-12	ON	Solid only	Solid_ON
p2@HOXC13	0.514	0	0.422	0.092	0	0.085	1.03278e-05	1	7.62075e-10	ON	Solid only	Solid_ON
p1@TEX19	0.667	0.745	0.618	0.123	0.014	0.095	4.33584e-08	1.5903e-16	1.46347e-18	ON	Pan	Pan_ON
p3@CDC6	0.667	0.608	0.647	0.123	0.041	0.155	4.33584e-08	1.69034e-10	3.07269e-15	ON	Pan	Pan_ON
p1@ENST00000432382,p1@uc003laj.1	0.583	0.314	0.686	0.108	0	0.16	1.46941e-06	3.119e-06	5.66369e-17	ON	Pan	Pan_ON
p4@CDC7	0.569	0.471	0.461	0.108	0.041	0.105	3.02815e-06	3.45098e-07	7.55212e-10	ON	Pan	Pan_ON
p2@ENST00000418244	0.403	0.059	0.343	0.077	0	0	0.000414506	0.189856	1.4005e-16	ON	Solid only	Solid_ON
p7@TP73	0.458	0.588	0.402	0.092	0.054	0.035	0.000114094	2.74473e-09	1.25162e-13	ON	Pan	Pan_ON
p4@VEPH1	0.389	0.02	0.363	0.077	0	0.085	0.000716642	0.715385	1.71902e-07	ON	Solid only	Solid_ON
p1@ENST00000512978	0.667	0.902	0.608	0.138	0.892	0.15	1.36466e-07	1	1.58724e-13	ON	Solid only	Solid_ON
p5@TMEM145	0.319	0.137	0.294	0.062	0	0.01	0.00399301	0.00843582	6.52505e-12	ON	Pan	Pan_ON
p2@WNT6	0.319	0.039	0.363	0.062	0.014	0.085	0.00399301	0.905325	1.71902e-07	ON	Solid only	Solid_ON
p1@ALPP	0.319	0	0.333	0.062	0.014	0.07	0.00399301	1	2.18061e-07	ON	Solid only	Solid_ON
p1@HOXB13	0.653	0.196	0.686	0.138	0	0.085	2.98041e-07	0.000705251	8.05243e-24	ON	Pan	Pan_ON
p1@ANKRD63	0.444	0.549	0.392	0.092	0.081	0.055	0.00020422	3.47636e-07	4.66841e-11	ON	Pan	Pan_ON
p5@WDR78	0.375	0.255	0.608	0.077	0.014	0.095	0.00124547	0.000335931	4.97928e-18	ON	Pan	Pan_ON
p3@CSAG1	0.306	0.196	0.304	0.062	0	0.015	0.0066804	0.000705251	1.40062e-11	ON	Pan	Pan_ON
p1@PRDM13	0.306	0.235	0.314	0.062	0.014	0.015	0.0066804	0.000762035	4.7516e-12	ON	Pan	Pan_ON
p8@SYCP2	0.306	0.078	0.304	0.062	0.149	0.04	0.0066804	0.568461	1.2303e-08	ON	Solid only	Solid_ON
p1@ENST00000510694,p1@ENST00000550223	0.639	0.333	0.588	0.138	0	0.08	6.40022e-07	1.18637e-06	2.14276e-18	ON	Pan	Pan_ON
p1@AK129700	0.431	0.314	0.451	0.092	0.284	0.075	0.000358041	1	6.2129e-12	ON	Solid only	Solid_ON
p3@ONECUT2	0.361	0.314	0.48	0.077	0	0.025	0.00211854	3.119e-06	3.8558e-19	ON	Pan	Pan_ON
p1@ACTL8	0.361	0.471	0.314	0.077	0.014	0.045	0.00211854	1.01649e-08	1.37734e-08	ON	Pan	Pan_ON
p3@C15orf39	0.361	0.784	0.363	0.077	0.176	0.06	0.00211854	9.0325e-10	2.41632e-09	ON	Pan	Pan_ON
p15@HDAC9	0.361	0.078	0.314	0.077	0.014	0.04	0.00211854	0.37653	4.73917e-09	ON	Solid only	Solid_ON
p1@ENST00000445523	0.556	0.843	0.598	0.123	0.392	0.1	1.58899e-05	9.37985e-06	4.98683e-17	ON	Solid only	Solid_ON
p1@C21orf90	0.417	0.333	0.441	0.092	0.041	0.05	0.000621951	0.000266962	7.73905e-14	ON	Pan	Pan_ON
p1@ENST00000505918,p1@ENST00000514905	0.417	0.373	0.402	0.092	0.068	0.08	0.000621951	0.000434289	2.16915e-09	ON	Pan	Pan_ON
p11@EEF1A2	0.542	0.137	0.363	0.123	0	0.045	3.00851e-05	0.00843582	1.0688e-10	ON	Pan	Pan_ON
p18@PABPC1	0.792	0.863	0.853	0.185	0.77	0.175	1.37677e-09	0.537125	3.53122e-27	ON	Solid only	Solid_ON
p13@FLJ22184	0.347	0.039	0.245	0.077	0	0.01	0.00358336	0.37653	1.38679e-09	ON	Solid only	Solid_ON
p22@FUS	0.472	0.549	0.578	0.108	0.297	0.12	0.000166064	0.026335	3.295e-14	ON	Solid only	Solid_ON
p5@TP73	0.403	0.608	0.451	0.092	0.081	0.035	0.00106763	1.61111e-08	4.20516e-16	ON	Pan	Pan_ON
p9@EEF1A2	0.403	0.118	0.265	0.092	0.014	0.05	0.00106763	0.0689176	3.96918e-06	ON	Solid only	Solid_ON
p5@ZIC2	0.653	0.314	0.588	0.154	0.014	0.055	8.77394e-07	2.5753e-05	3.11359e-21	ON	Pan	Pan_ON
p1@ENST00000520433	0.458	0.176	0.412	0.108	0	0.065	0.000291351	0.00163962	4.93623e-11	ON	Pan	Pan_ON
p23@USP1	0.458	0.51	0.471	0.108	0.189	0.07	0.000291351	0.00169902	2.7542e-13	ON	Solid only	Solid_ON
p6@ARL6IP6	0.639	0.647	0.598	0.154	0.162	0.115	1.82484e-06	1.40096e-06	1.05572e-15	ON	Pan	Pan_ON
p3@SPIRE2	0.333	0.039	0.392	0.077	0.014	0.045	0.00586133	0.905325	4.82689e-12	ON	Solid only	Solid_ON
p1@KSR2	0.333	0.216	0.48	0.077	0.149	0.025	0.00586133	0.692515	3.8558e-19	ON	Solid only	Solid_ON
p1@uc002myk.2	0.333	0.039	0.412	0.077	0.027	0.06	0.00586133	1	1.76929e-11	ON	Solid only	Solid_ON
p1@TMPRSS3	0.333	0.118	0.333	0.077	0.095	0.035	0.00586133	1	2.03177e-10	ON	Solid only	Solid_ON
p6@PAX6	0.569	0.157	0.569	0.138	0	0.1	2.10903e-05	0.00379427	1.77897e-15	ON	Pan	Pan_ON
p2@BRSK2	0.569	0.137	0.431	0.138	0.041	0.085	2.10903e-05	0.240663	2.97966e-10	ON	Pan	Pan_ON
p11@GNG4	0.389	0.118	0.373	0.092	0	0.025	0.00179104	0.0189529	1.81854e-13	ON	Solid only	Solid_ON
p6@ATF1	0.389	0.412	0.402	0.092	0.068	0.07	0.00179104	0.000110351	3.48102e-10	ON	Pan	Pan_ON
p9@GCFC1	0.389	0.608	0.529	0.092	0.203	0.09	0.00179104	7.4811e-05	2.36219e-14	ON	Solid only	Solid_ON
p1@POU4F1	0.444	0.549	0.451	0.108	0.203	0.07	0.000501922	0.000946522	2.24943e-12	ON	Pan	Pan_ON
p6@CDK2	0.5	0.647	0.461	0.123	0.027	0.085	0.000189911	2.00066e-12	1.83998e-11	ON	Pan	Pan_ON
p6@EEF1A2	0.5	0.078	0.392	0.123	0.027	0.04	0.000189911	0.491345	1.39968e-12	ON	Solid only	Solid_ON
p1@TTC6	0.556	0.059	0.471	0.138	0.014	0.02	3.98353e-05	0.613325	2.04518e-19	ON	Solid only	Solid_ON
p1@ENST00000431294	0.319	0.157	0.343	0.077	0	0.005	0.00952107	0.00379427	2.47939e-15	ON	Pan	Pan_ON
p1@GABRD	0.319	0.176	0.363	0.077	0.014	0.05	0.00952107	0.00811506	3.1903e-10	ON	Pan	Pan_ON
p18@IVNS1ABP	0.319	0.333	0.49	0.077	0.378	0.08	0.00952107	1	2.54442e-13	ON	Solid only	Solid_ON
p1@ENST00000411439	0.375	0.255	0.353	0.092	0.027	0.075	0.00296031	0.0013282	1.2444e-07	ON	Pan	Pan_ON
p9@TPD52	0.375	0.451	0.412	0.092	0.203	0.04	0.00296031	0.0248318	1.62911e-13	ON	Solid only	Solid_ON
p9@SPATS2L	0.375	0.098	0.363	0.092	0.068	0.085	0.00296031	1	1.71902e-07	ON	Solid only	Solid_ON
p1@EDA2R	0.625	0.255	0.471	0.908	0.189	0.91	0.00296031	0.715385	2.36219e-14	OFF	Solid only	Solid_OFF
p1@TICAM2,p2@TMED7-TICAM2	0.681	0.765	0.598	0.923	0.892	0.945	0.00952107	0.22182	1.69051e-11	OFF	Solid only	Solid_OFF
p1@ENST00000550380	0.5	0.176	0.422	0.877	0.081	0.865	0.000189911	0.37653	3.41678e-13	OFF	Solid only	Solid_OFF
p1@MAP1A	0.5	0.412	0.578	0.877	0.405	0.935	0.000189911	1	1.79308e-11	OFF	Solid only	Solid_OFF
p1@FLI1	0.556	0.922	0.529	0.892	1	0.95	0.000501922	0.0902601	2.62727e-15	OFF	Solid only	Solid_OFF
p2@TRANK1	0.375	0.451	0.5	0.846	0.973	0.895	3.65445e-06	9.0325e-10	1.11105e-11	OFF	Pan	Pan_OFF
p1@ARHGAP22	0.611	0.137	0.48	0.908	0.419	0.885	0.00179104	0.00495893	6.40455e-12	OFF	Solid only	Solid_OFF
p3@ENG	0.667	0.588	0.559	0.923	0.649	0.975	0.00586133	0.915487	5.49999e-17	OFF	Solid only	Solid_OFF
p4@RFTN1	0.542	0.765	0.412	0.892	0.878	0.905	0.000291351	0.356783	5.89158e-17	OFF	Solid only	Solid_OFF
p1@RUSC2	0.417	0.059	0.294	0.862	0.108	0.83	1.07968e-05	0.859474	3.51224e-17	OFF	Solid only	Solid_OFF
p1@ZNF665	0.653	0.686	0.745	0.923	1	0.965	0.00358336	3.119e-06	4.48653e-07	OFF	Pan	Pan_OFF
p1@FES	0.264	0.549	0.284	0.831	0.757	0.835	2.42628e-08	0.0750537	3.01638e-18	OFF	Solid only	Solid_OFF
p1@RCN3	0.583	0.471	0.657	0.908	0.486	0.945	0.000621951	1	6.08869e-09	OFF	Solid only	Solid_OFF
p1@FLRT2	0.583	0	0.569	0.908	0.095	0.895	0.000621951	0.1314	8.02626e-09	OFF	Solid only	Solid_OFF
p1@THBD	0.583	0.373	0.51	0.908	0.581	0.925	0.000621951	0.0987146	9.0913e-14	OFF	Solid only	Solid_OFF
p1@PTGS1	0.514	0.784	0.588	0.892	0.676	0.935	9.36784e-05	0.493989	4.93623e-11	OFF	Solid only	Solid_OFF
p2@SLC38A5	0.25	0.902	0.422	0.831	0.149	0.87	1.03829e-08	6.77354e-15	2.10529e-13	OFF	Solid only	Solid_OFF
p1@EMILIN1	0.25	0.255	0.353	0.831	0.27	0.85	1.03829e-08	1	1.46334e-15	OFF	Solid only	Solid_OFF
p1@MALL	0.639	0.039	0.588	0.923	0.041	0.905	0.00211854	1	9.65895e-09	OFF	Solid only	Solid_OFF
p1@LPAR6	0.5	0.588	0.559	0.892	0.905	0.925	7.82931e-05	0.000531108	1.71246e-11	OFF	Pan	Pan_OFF
p1@MFSD7	0.167	0.176	0.216	0.815	0.757	0.835	4.11585e-11	1.15751e-08	9.19423e-23	OFF	Solid only	Solid_OFF
p1@NFATC4	0.431	0.235	0.549	0.877	0.027	0.89	8.22318e-06	0.00282546	2.67115e-09	OFF	Solid only	Solid_OFF
p5@LTBP2	0.361	0	0.402	0.862	0.081	0.91	6.40022e-07	0.221141	5.80052e-18	OFF	Solid only	Solid_OFF
p1@SFRP1	0.694	0.176	0.529	0.938	0.095	0.895	0.0066804	0.424604	1.78849e-10	OFF	Solid only	Solid_OFF
p3@MMP14	0.694	0.314	0.725	0.938	0.176	0.945	0.0066804	0.235014	3.41524e-06	OFF	Solid only	Solid_OFF
p3@ENST00000456355	0.694	0.706	0.529	0.938	0.757	0.955	0.0066804	0.886905	7.05108e-16	OFF	Solid only	Solid_OFF
p1@ARHGAP31	0.694	0.569	0.647	0.938	0.73	0.94	0.0066804	0.224695	6.19252e-09	OFF	Solid only	Solid_OFF
p2@RARA	0.694	0.196	0.608	0.938	0.554	0.935	0.0066804	0.000783841	3.53984e-10	OFF	Solid only	Solid_OFF
p1@C3orf18	0.694	0.725	0.765	0.938	0.851	0.95	0.0066804	0.292641	3.90974e-05	OFF	Solid only	Solid_OFF
p1@ZC4H2	0.694	0.706	0.696	0.938	0.959	0.965	0.0066804	0.00112466	4.02277e-09	OFF	Pan	Pan_OFF
p1@GBGT1,p3@RALGDS	0.556	0.843	0.588	0.908	0.946	0.945	0.00020422	0.196424	6.03542e-12	OFF	Solid only	Solid_OFF
p1@CXCL5	0.347	0	0.324	0.862	0.23	0.86	2.98041e-07	0.000762035	5.31505e-18	OFF	Solid only	Solid_OFF
p1@IRAK3	0.347	0.667	0.52	0.862	0.824	0.96	2.98041e-07	0.170565	5.10731e-17	OFF	Solid only	Solid_OFF
p1@ENST00000421718	0.681	0.804	0.775	0.938	0.797	0.945	0.00399301	1	0.000206586	OFF	Solid only	Solid_OFF
p2@RHOD	0.681	0.098	0.755	0.938	0.365	0.95	0.00399301	0.00495893	1.80659e-05	OFF	Solid only	Solid_OFF
p1@LAYN	0.681	0.137	0.578	0.938	0.541	0.97	0.00399301	6.70895e-05	3.0092e-15	OFF	Solid only	Solid_OFF
p6@LTBP2	0.333	0.02	0.392	0.862	0.041	0.88	1.36466e-07	1	7.88544e-16	OFF	Solid only	Solid_OFF
p1@BST1	0.333	0.431	0.422	0.862	0.635	0.96	1.36466e-07	0.0987146	1.23675e-22	OFF	Solid only	Solid_OFF
p1@BX649164	0.611	0.078	0.451	0.923	0.068	0.875	0.000716642	1	1.9789e-12	OFF	Solid only	Solid_OFF
p1@TYMP	0.611	0.588	0.618	0.923	1	0.985	0.000716642	2.08212e-08	1.78372e-15	OFF	Pan	Pan_OFF
p1@MIR100HG	0.458	0	0.441	0.892	0.041	0.89	1.14583e-05	0.560247	3.8762e-14	OFF	Solid only	Solid_OFF
p2@PYCARD	0.597	0.843	0.539	0.923	0.959	0.955	0.000414506	0.152881	2.23285e-15	OFF	Solid only	Solid_OFF
p2@RASSF1	0.306	0.902	0.431	0.862	0.959	0.94	2.48579e-08	0.560247	1.77348e-19	OFF	Solid only	Solid_OFF
p1@NKAPL	0.056	0.039	0.098	0.815	0.608	0.87	5.97048e-17	8.48752e-10	1.14216e-36	OFF	Pan	Pan_OFF
p1@CLIP3	0.583	0.176	0.52	0.923	0.338	0.95	0.00023836	0.189856	8.21479e-16	OFF	Solid only	Solid_OFF
p1@PEAR1	0.278	0.157	0.235	0.862	0.189	0.875	7.87367e-09	1	4.79211e-25	OFF	Solid only	Solid_OFF
p2@BCAT1	0.278	0.333	0.284	0.862	0.635	0.895	7.87367e-09	0.00680545	1.23818e-23	OFF	Solid only	Solid_OFF
p1@AKNA	0.347	0.863	0.245	0.877	1	0.86	9.90149e-08	0.00843582	6.42994e-23	OFF	Pan	Pan_OFF
p3@IGFBP7	0.5	0.49	0.5	0.908	0.257	0.895	1.95414e-05	0.0363655	1.11105e-11	OFF	Solid only	Solid_OFF
p1@ZNF132	0.5	0.412	0.422	0.908	0.838	0.915	1.95414e-05	1.92345e-05	2.38601e-17	OFF	Solid only	Solid_OFF
p1@TSTD1,p2@F11R	0.569	0.686	0.608	0.923	1	0.915	0.000133943	3.119e-06	1.44353e-08	OFF	Pan	Pan_OFF
p1@TNFRSF10C	0.25	0.451	0.265	0.862	0.635	0.88	9.15314e-10	0.145195	1.86089e-23	OFF	Pan	Pan_OFF
p2@ZNF677	0.486	0.333	0.559	0.908	0.838	0.975	1.03278e-05	5.77298e-07	5.49999e-17	OFF	Pan	Pan_OFF
p1@ZNF677	0.486	0.353	0.598	0.908	0.905	0.985	1.03278e-05	5.55092e-09	1.73403e-16	OFF	Pan	Pan_OFF
p1@SYNC	0.722	0.098	0.618	0.954	0.108	0.925	0.0074589	1	5.97548e-09	OFF	Solid only	Solid_OFF
p2@C1orf85	0.722	0.255	0.618	0.954	0.459	0.925	0.0074589	0.0893814	5.97548e-09	OFF	Solid only	Solid_OFF
p1@ELOVL4	0.722	0.314	0.716	0.954	0.514	0.94	0.0074589	0.0996329	3.11258e-06	OFF	Solid only	Solid_OFF
p2@ENST00000456355	0.722	0.686	0.569	0.954	0.784	0.955	0.0074589	0.609942	6.67779e-14	OFF	Solid only	Solid_OFF
p8@HIST1H3A,p8@HIST1H3B,p8@HIST1H3C,p8@HIST1H3D,p8@HIST1H3E,p8@HIST1H3F,p8@HIST1H3G,p8@HIST1H3I,p8@HIST1H3J,p9@HIST1H3H	0.722	0.824	0.833	0.954	0.919	0.98	0.0074589	0.37653	5.71022e-05	OFF	Solid only	Solid_OFF
p3@VIM	0.722	0.745	0.608	0.954	0.919	0.97	0.0074589	0.0441087	9.08935e-14	OFF	Solid only	Solid_OFF
p1@C9orf167	0.722	0.784	0.657	0.954	0.946	0.97	0.0074589	0.0420173	1.95303e-11	OFF	Solid only	Solid_OFF
p4@GNB2	0.722	0.725	0.598	0.954	0.959	0.955	0.0074589	0.00225889	1.69186e-12	OFF	Pan	Pan_OFF
p1@LTBP1	0.639	0.255	0.529	0.938	0.284	0.925	0.000816681	1	7.69657e-13	OFF	Solid only	Solid_OFF
p2@ARMCX1	0.639	0.255	0.529	0.938	0.446	0.96	0.000816681	0.125289	1.74648e-16	OFF	Solid only	Solid_OFF
p3@LYNX1	0.639	0.157	0.539	0.938	0.392	0.905	0.000816681	0.0250212	1.32664e-10	OFF	Solid only	Solid_OFF
p1@ENST00000422124	0.639	0.196	0.686	0.938	0.676	0.94	0.000816681	2.82385e-06	2.67701e-07	OFF	Solid only	Solid_OFF
p1@RNLS	0.639	0.569	0.637	0.938	0.919	0.925	0.000816681	8.72229e-05	3.5006e-08	OFF	Pan	Pan_OFF
p2@CDH13	0.556	0.059	0.598	0.923	0.041	0.91	7.48616e-05	1	1.14612e-08	OFF	Solid only	Solid_OFF
p1@GLB1L	0.153	0.039	0.235	0.846	0.689	0.845	6.93319e-13	4.24504e-12	3.04273e-22	OFF	Pan	Pan_OFF
p2@CCND2	0.389	0.706	0.51	0.892	0.986	0.945	3.3081e-07	6.21086e-05	9.31386e-16	OFF	Pan	Pan_OFF
p1@TSPY26P	0.306	0.216	0.471	0.877	0.743	0.9	8.52473e-09	2.88782e-07	1.81854e-13	OFF	Solid only	Solid_OFF
p1@VILL	0.625	0.902	0.52	0.938	0.986	0.97	0.000468158	0.1314	2.24277e-18	OFF	Solid only	Solid_OFF
p1@FBN2	0.542	0.235	0.647	0.923	0.392	0.915	4.09095e-05	0.223974	6.09193e-07	OFF	Solid only	Solid_OFF
p1@NOX5,p1@SPESP1	0.194	0.02	0.225	0.862	0.716	0.895	8.94387e-12	5.1135e-14	7.87297e-28	OFF	Solid only	Solid_OFF
p2@RINL	0.528	0.627	0.608	0.923	0.905	0.91	2.25012e-05	0.00203364	2.717e-08	OFF	Solid only	Solid_OFF
p1@IFFO1	0.611	0.922	0.402	0.938	1	0.94	0.000262154	0.0902601	3.31689e-21	OFF	Solid only	Solid_OFF
p1@PDLIM4	0.694	0.255	0.706	0.954	0.135	0.945	0.00260022	0.274871	7.06157e-07	OFF	Solid only	Solid_OFF
p1@SELENBP1	0.694	0.157	0.706	0.954	0.203	0.96	0.00260022	1	3.16714e-08	OFF	Solid only	Solid_OFF
p1@JAM3	0.694	0.431	0.706	0.954	0.824	0.945	0.00260022	0.000100425	7.06157e-07	OFF	Solid only	Solid_OFF
p4@LTBP2	0.431	0	0.392	0.908	0.054	0.895	1.03885e-06	0.356783	4.04537e-17	OFF	Solid only	Solid_OFF
p2@CRYAB	0.319	0.118	0.235	0.892	0.014	0.83	5.72103e-09	0.0689176	5.01189e-21	OFF	Solid only	Solid_OFF
p1@THBS2	0.5	0.039	0.48	0.923	0.054	0.885	6.20169e-06	1	6.40455e-12	OFF	Solid only	Solid_OFF
p2@PDLIM4	0.681	0.235	0.716	0.954	0.095	0.93	0.00150745	0.135232	1.41601e-05	OFF	Solid only	Solid_OFF
p1@COL1A1	0.681	0.176	0.608	0.954	0.149	0.93	0.00150745	1	1.36887e-09	OFF	Solid only	Solid_OFF
p1@CHST2	0.681	0.765	0.569	0.954	0.959	0.99	0.00150745	0.00859904	4.65413e-19	OFF	Pan	Pan_OFF
p1@ZNF671	0.583	0.961	0.48	0.938	0.986	0.96	8.1587e-05	0.905325	3.5878e-19	OFF	Solid only	Solid_OFF
p2@ZNF518B	0.583	0.686	0.716	0.938	0.986	0.93	8.1587e-05	2.5753e-05	1.41601e-05	OFF	Pan	Pan_OFF
p2@PLCD1	0.306	0	0.402	0.892	0.162	0.87	2.05632e-09	0.00843582	1.52955e-14	OFF	Solid only	Solid_OFF
p2@C16orf45	0.764	0.235	0.637	0.969	0.311	0.925	0.00773749	0.735069	3.5006e-08	OFF	Solid only	Solid_OFF
p1@UCHL1	0.764	0.118	0.686	0.969	0.284	0.945	0.00773749	0.0984865	1.61843e-07	OFF	Solid only	Solid_OFF
p1@FAM109B	0.486	0.196	0.608	0.923	0.662	0.97	3.33724e-06	5.8816e-06	9.08935e-14	OFF	Solid only	Solid_OFF
p1@KRBOX1	0.208	0.118	0.235	0.877	0.378	0.855	7.4907e-12	0.0105741	4.05312e-23	OFF	Solid only	Solid_OFF
p1@TCF4	0.667	0.824	0.804	0.954	0.77	0.99	0.000860459	0.846204	2.30922e-07	OFF	Solid only	Solid_OFF
p3@FN1	0.667	0.039	0.51	0.954	0.041	0.88	0.000860459	1	2.73733e-10	OFF	Solid only	Solid_OFF
p2@MAP1LC3A	0.667	0.216	0.598	0.954	0.851	0.99	0.000860459	1.13012e-10	2.0548e-17	OFF	Pan	Pan_OFF
p1@CYB5R2	0.569	0.373	0.696	0.938	0.473	0.94	4.49287e-05	0.571909	6.0406e-07	OFF	Solid only	Solid_OFF
p1@ITGA4	0.569	0.922	0.52	0.938	1	0.91	4.49287e-05	0.0902601	5.61836e-12	OFF	Solid only	Solid_OFF
p11@HIST1H3A,p11@HIST1H3B,p11@HIST1H3C,p11@HIST1H3D,p11@HIST1H3E,p11@HIST1H3F,p11@HIST1H3G,p11@HIST1H3I,p11@HIST1H3J,p12@HIST1H3H	0.472	0.216	0.402	0.923	0.446	0.95	1.74347e-06	0.051273	1.75423e-22	OFF	Solid only	Solid_OFF
p1@COX7A1	0.083	0	0.206	0.862	0.108	0.885	3.37013e-17	0.0762885	3.04892e-28	OFF	Pan	Pan_OFF
p1@CDH13	0.556	0.039	0.529	0.938	0.041	0.91	2.46214e-05	1	1.45011e-11	OFF	Solid only	Solid_OFF
p5@RUSC2	0.556	0.098	0.363	0.938	0.257	0.885	2.46214e-05	0.121828	7.11515e-18	OFF	Solid only	Solid_OFF
p1@ZIK1	0.556	0.529	0.461	0.938	0.959	0.96	2.46214e-05	3.45098e-07	2.48714e-20	OFF	Pan	Pan_OFF
p1@PTPLAD2	0.556	0.765	0.578	0.938	1	0.985	2.46214e-05	0.000122719	1.54596e-17	OFF	Pan	Pan_OFF
p2@PXDN	0.75	0.157	0.598	0.969	0.176	0.915	0.00465171	1	6.54981e-09	OFF	Solid only	Solid_OFF
p1@CXCL2	0.75	0.392	0.686	0.969	0.649	0.965	0.00465171	0.0282091	1.50836e-09	OFF	Solid only	Solid_OFF
p2@FCGRT	0.75	0.569	0.853	0.969	0.77	1	0.00465171	0.0736197	7.00249e-07	OFF	Solid only	Solid_OFF
p1@SLC27A3	0.75	0.451	0.843	0.969	0.865	0.97	0.00465171	2.18964e-05	0.00124077	OFF	Pan	Pan_OFF
p1@SESN3	0.75	0.863	0.833	0.969	1	0.985	0.00465171	0.00843582	1.77038e-05	OFF	Pan	Pan_OFF
p2@GALC	0.75	0.843	0.833	0.969	1	0.97	0.00465171	0.00379427	0.000377933	OFF	Pan	Pan_OFF
p2@MT1A	0.458	0.176	0.48	0.923	0.081	0.895	8.77394e-07	0.37653	1.14527e-12	OFF	Solid only	Solid_OFF
p2@POMC	0.069	0.235	0.108	0.862	0.973	0.825	4.24134e-18	3.85707e-16	1.14571e-30	OFF	Pan	Pan_OFF
p8@FN1	0.653	0.02	0.5	0.954	0.068	0.88	0.000492501	0.715385	1.09357e-10	OFF	Solid only	Solid_OFF
p2@LTBP4	0.653	0.863	0.686	0.954	0.946	0.945	0.000492501	0.312043	1.61843e-07	OFF	Solid only	Solid_OFF
p1@CDH11	0.542	0.078	0.461	0.938	0.041	0.885	1.28642e-05	0.765683	8.78671e-13	OFF	Solid only	Solid_OFF
p1@PLCD1	0.639	0.039	0.578	0.954	0.554	0.96	0.000276972	1.67129e-08	5.49592e-14	OFF	Pan	Pan_OFF
p1@STAT5A	0.736	0.922	0.804	0.969	1	0.98	0.00275041	0.0902601	3.8429e-06	OFF	Solid only	Solid_OFF
p1@ZNF486	0.736	0.667	0.647	0.969	0.986	0.98	0.00275041	1.00695e-05	3.3204e-13	OFF	Pan	Pan_OFF
p3@RNH1	0.528	0.647	0.49	0.938	0.689	0.98	6.79726e-06	1	1.11284e-21	OFF	Solid only	Solid_OFF
p2@NDN	0.417	0.118	0.314	0.923	0.297	0.845	1.37951e-07	0.0954809	3.30158e-17	OFF	Solid only	Solid_OFF
p1@ANGPTL4	0.722	0.392	0.765	0.969	0.189	0.97	0.00162216	0.057975	9.58293e-07	OFF	Solid only	Solid_OFF
p1@ZNF167	0.722	0.333	0.667	0.969	0.959	0.96	0.00162216	3.79314e-12	6.73796e-10	OFF	Pan	Pan_OFF
p1@PCDHGA11	0.292	0.373	0.304	0.908	0.176	0.93	1.69638e-10	0.0773915	2.52576e-26	OFF	Solid only	Solid_OFF
p1@ANPEP	0.611	0.49	0.48	0.954	0.649	0.97	8.38495e-05	0.259929	1.18058e-20	OFF	Solid only	Solid_OFF
p2@RUSC1	0.278	0.137	0.471	0.908	0.446	0.905	6.50186e-11	0.00276178	1.07824e-13	OFF	Solid only	Solid_OFF
p1@COL1A2	0.486	0.157	0.539	0.938	0.149	0.92	9.57411e-07	1	5.82074e-12	OFF	Solid only	Solid_OFF
p4@RNH1	0.264	0.667	0.196	0.908	0.703	0.955	2.24024e-11	1	9.91063e-39	OFF	Solid only	Solid_OFF
p6@HIST1H4A,p6@HIST1H4B,p6@HIST1H4D,p6@HIST1H4E,p6@HIST1H4F,p6@HIST1H4H,p6@HIST1H4I,p6@HIST1H4J,p6@HIST1H4K,p6@HIST1H4L,p6@HIST2H4A,p6@HIST2H4B,p6@HIST4H4,p7@HIST1H4C	0.597	1	0.686	0.954	0.986	1	4.60651e-05	1	4.90996e-15	OFF	Solid only	Solid_OFF
p1@DKK3	0.597	0.039	0.686	0.954	0.378	0.95	4.60651e-05	6.83005e-05	3.7175e-08	OFF	Solid only	Solid_OFF
p1@PHYHD1	0.347	0.176	0.441	0.923	0.419	0.905	1.9591e-09	0.0276287	2.10885e-15	OFF	Solid only	Solid_OFF
p1@NDN	0.458	0.176	0.392	0.938	0.486	0.96	2.21823e-07	0.00391121	1.70982e-24	OFF	Solid only	Solid_OFF
p1@CXCL1	0.694	0.255	0.627	0.969	0.527	0.975	0.000859257	0.0161545	1.81854e-13	OFF	Solid only	Solid_OFF
p1@EHD3	0.694	0.373	0.755	0.969	0.797	0.94	0.000859257	3.41302e-05	8.49137e-05	OFF	Solid only	Solid_OFF
p1@PLIN2	0.694	0.902	0.725	0.969	1	0.995	0.000859257	0.0419484	6.90097e-12	OFF	Solid only	Solid_OFF
p1@NAALADL1	0.097	0.039	0.137	0.892	0.946	0.96	4.24134e-18	1.25954e-22	1.21657e-45	OFF	Pan	Pan_OFF
p1@CCND2	0.444	0.706	0.598	0.938	0.946	0.975	1.07882e-07	0.00250035	6.21534e-15	OFF	Pan	Pan_OFF
p3@HTRA1	0.569	0.02	0.539	0.954	0.108	0.89	1.28642e-05	0.22182	1.12882e-09	OFF	Solid only	Solid_OFF
p1@ENG	0.681	0.51	0.578	0.969	0.527	0.98	0.000483412	1	1.04076e-16	OFF	Solid only	Solid_OFF
p1@ARMCX1	0.681	0.333	0.569	0.969	0.662	0.985	0.000483412	0.00349015	4.34614e-18	OFF	Solid only	Solid_OFF
p3@MAP1LC3A	0.681	0.196	0.588	0.969	0.608	0.94	0.000483412	6.70895e-05	1.76929e-11	OFF	Solid only	Solid_OFF
p1@ZNF69	0.681	0.706	0.794	0.969	0.932	0.95	0.000483412	0.00639395	0.000505382	OFF	Pan	Pan_OFF
p1@ZNF542	0.681	0.471	0.647	0.969	0.959	0.995	0.000483412	1.59051e-08	7.56593e-16	OFF	Pan	Pan_OFF
p1@ENST00000514062	0.556	0.373	0.451	0.954	0.189	0.89	6.79726e-06	0.0902601	1.1359e-13	OFF	Solid only	Solid_OFF
p1@GYPC	0.542	0.922	0.373	0.954	1	0.945	3.66861e-06	0.0902601	1.23818e-23	OFF	Solid only	Solid_OFF
p1@FBXL7	0.667	0.118	0.5	0.969	0.027	0.895	0.000265547	0.187209	1.11105e-11	OFF	Solid only	Solid_OFF
p1@GPX3	0.667	0.216	0.667	0.969	0.459	0.99	0.000265547	0.0340471	7.74425e-14	OFF	Solid only	Solid_OFF
p1@HSPB6	0.264	0	0.392	0.923	0.068	0.885	4.4633e-12	0.219457	3.69046e-16	OFF	Solid only	Solid_OFF
p1@QPCT	0.653	0.255	0.676	0.969	0.703	0.955	0.000145777	2.66843e-05	5.32303e-09	OFF	Solid only	Solid_OFF
p1@ZNF518B	0.653	0.725	0.755	0.969	1	0.99	0.000145777	2.03683e-05	1.38679e-09	OFF	Pan	Pan_OFF
p1@PLAT	0.792	0.137	0.686	0.985	0.068	0.935	0.00645597	0.493989	5.50164e-07	OFF	Solid only	Solid_OFF
p1@TMEM25	0.792	0.745	0.873	0.985	0.757	0.975	0.00645597	1	0.00560429	OFF	Solid only	Solid_OFF
p1@MSL3P1	0.792	0.725	0.892	0.985	0.838	0.985	0.00645597	0.405007	0.00315423	OFF	Solid only	Solid_OFF
p1@IL1R1	0.792	0.216	0.735	0.985	0.595	0.98	0.00645597	0.000294443	4.38958e-09	OFF	Solid only	Solid_OFF
p1@ALDOC	0.792	0.922	0.863	0.985	1	1	0.00645597	0.0902601	1.9933e-06	OFF	Solid only	Solid_OFF
p2@SBNO2	0.639	0.941	0.696	0.969	1	0.98	7.88082e-05	0.189856	7.29123e-11	OFF	Solid only	Solid_OFF
p1@SPATA18	0.5	0.294	0.608	0.954	0.378	0.925	4.73342e-07	0.688277	2.46276e-09	OFF	Solid only	Solid_OFF
p1@PCDHGA12	0.347	0.235	0.225	0.938	0.216	0.92	4.15545e-10	1	9.56014e-31	OFF	Solid only	Solid_OFF
p1@CYGB	0.347	0.039	0.48	0.938	0.27	0.915	4.15545e-10	0.00442664	2.62098e-14	OFF	Pan	Pan_OFF
p3@ARAP1	0.778	1	0.902	0.985	0.986	0.985	0.00381773	1	0.00690614	OFF	Solid only	Solid_OFF
p2@DKK3	0.778	0.02	0.784	0.985	0.162	0.955	0.00381773	0.0567901	9.16922e-05	OFF	Solid only	Solid_OFF
p2@BASP1	0.778	0.667	0.775	0.985	0.743	1	0.00381773	0.738899	1.30427e-10	OFF	Solid only	Solid_OFF
p2@FAM50B	0.778	0.314	0.765	0.985	0.797	0.945	0.00381773	2.66834e-06	0.000108347	OFF	Solid only	Solid_OFF
p1@MAGI2-AS3	0.625	0.157	0.422	0.969	0.257	0.945	4.28101e-05	0.560247	1.17235e-20	OFF	Solid only	Solid_OFF
p1@LOC100128252	0.625	0.333	0.588	0.969	0.784	0.995	4.28101e-05	1.60437e-05	4.66322e-19	OFF	Solid only	Solid_OFF
p1@ZNF418	0.625	0.314	0.51	0.969	0.919	0.9	4.28101e-05	2.28068e-10	1.71246e-11	OFF	Pan	Pan_OFF
p1@DNALI1	0.472	0.078	0.461	0.954	0.041	0.88	1.07882e-07	0.765683	1.84358e-12	OFF	Solid only	Solid_OFF
p1@RTN2	0.611	0.882	0.686	0.969	0.581	0.975	2.31372e-05	0.00224793	1.12692e-10	OFF	Solid only	Solid_OFF
p1@SLC43A3	0.764	0.98	0.676	0.985	1	0.985	0.00218712	0.715385	1.61055e-12	OFF	Solid only	Solid_OFF
p1@ZSCAN18	0.764	0.51	0.686	0.985	0.986	0.99	0.00218712	3.39168e-09	7.26295e-13	OFF	Pan	Pan_OFF
p1@MAP1LC3A	0.764	0.431	0.647	0.985	0.986	0.995	0.00218712	3.34503e-11	7.56593e-16	OFF	Pan	Pan_OFF
p1@TNFSF12-TNFSF13,p1@TNFSF12	0.764	0.392	0.735	0.985	1	1	0.00218712	1.76777e-13	1.51206e-12	OFF	Pan	Pan_OFF
p1@INPP5F	0.139	0	0.147	0.923	0.324	0.86	1.47334e-17	1.59306e-05	1.51395e-30	OFF	Solid only	Solid_OFF
p1@AEBP1	0.444	0.569	0.52	0.954	0.743	0.975	2.24627e-08	0.163064	3.8558e-19	OFF	Solid only	Solid_OFF
p1@TCN2	0.75	0.784	0.765	0.985	0.689	0.975	0.00125897	0.619008	3.03792e-07	OFF	Solid only	Solid_OFF
p2@CLK3	0.75	0.843	0.696	0.985	0.919	0.95	0.00125897	0.536402	9.26868e-08	OFF	Solid only	Solid_OFF
p1@ENST00000502162,p1@ENST00000508309,p1@ENST00000509921	0.75	0.961	0.765	0.985	1	0.96	0.00125897	0.37653	6.91089e-06	OFF	Solid only	Solid_OFF
p1@SEPT9	0.583	0.824	0.608	0.969	0.986	0.94	6.14898e-06	0.00811506	1.32664e-10	OFF	Pan	Pan_OFF
p1@EVC2	0.569	0.275	0.569	0.969	0.743	0.955	3.30096e-06	5.70555e-06	6.67779e-14	OFF	Solid only	Solid_OFF
p3@SEPT9	0.569	0.745	0.657	0.969	1	0.93	3.30096e-06	5.14978e-05	9.12584e-08	OFF	Pan	Pan_OFF
p2@FN1	0.736	0.078	0.539	0.985	0.095	0.895	0.000714649	1	7.55212e-10	OFF	Solid only	Solid_OFF
p1@PXDN	0.736	0.157	0.608	0.985	0.23	0.935	0.000714649	0.715385	3.53984e-10	OFF	Solid only	Solid_OFF
p1@PYCARD	0.736	0.902	0.657	0.985	1	1	0.000714649	0.0419484	1.4005e-16	OFF	Solid only	Solid_OFF
p1@MEG3	0.375	0.255	0.402	0.954	0.27	0.95	5.13712e-10	1	1.75423e-22	OFF	Solid only	Solid_OFF
p2@MAGI2-AS3	0.542	0.078	0.392	0.969	0.149	0.93	8.50078e-07	0.568461	1.18058e-20	OFF	Solid only	Solid_OFF
p2@HKR1	0.722	0.706	0.804	0.985	0.986	1	0.000407864	6.21086e-05	3.42906e-09	OFF	Pan	Pan_OFF
p1@ZNF880	0.722	0.471	0.716	0.985	0.973	1	0.000407864	2.77256e-09	1.58054e-13	OFF	Pan	Pan_OFF
p1@SERP2	0.361	0.02	0.441	0.954	0.189	0.905	1.83482e-10	0.0198423	2.10885e-15	OFF	Solid only	Solid_OFF
p1@C10orf116	0.528	0.02	0.608	0.969	0.338	0.945	4.0998e-07	6.36154e-05	4.66841e-11	OFF	Solid only	Solid_OFF
p1@GOLGA8A	0.708	0.784	0.843	0.985	0.973	0.98	0.000229491	0.00919215	0.000135298	OFF	Pan	Pan_OFF
p1@TSPYL5	0.472	0.196	0.5	0.969	0.892	0.99	1.93304e-08	5.6113e-13	5.0851e-23	OFF	Pan	Pan_OFF
p1@ENST00000462729,p1@ENST00000476232,p1@ENST00000512906	0.681	0.373	0.647	0.985	0.432	0.97	7.15057e-05	0.923854	6.80677e-12	OFF	Solid only	Solid_OFF
p1@RHOD	0.681	0.078	0.765	0.985	0.338	0.965	7.15057e-05	0.00621357	2.70594e-06	OFF	Solid only	Solid_OFF
p1@ENST00000509788	0.667	0.059	0.569	0.985	0.27	0.905	3.98353e-05	0.012695	1.66542e-09	OFF	Solid only	Solid_OFF
p1@ME3	0.667	0.549	0.775	0.985	0.676	0.97	3.98353e-05	0.427212	2.37177e-06	OFF	Solid only	Solid_OFF
p1@ARL10	0.667	0.451	0.755	0.985	0.878	0.995	3.98353e-05	8.01481e-06	1.86106e-10	OFF	Pan	Pan_OFF
p1@HIST1H1A	0.667	0.275	0.627	0.985	0.865	0.99	3.98353e-05	2.1098e-09	7.49729e-16	OFF	Pan	Pan_OFF
p1@EPSTI1	0.667	0.824	0.696	0.985	1	0.965	3.98353e-05	0.00163962	4.02277e-09	OFF	Pan	Pan_OFF
p1@LYNX1	0.444	0.118	0.471	0.969	0.486	0.91	4.21414e-09	0.000201452	2.36219e-14	OFF	Pan	Pan_OFF
p1@FEZ1	0.653	0.373	0.676	0.985	0.405	0.98	2.16133e-05	1	8.52202e-12	OFF	Solid only	Solid_OFF
p1@NYNRIN	0.639	0.471	0.667	0.985	0.284	0.93	1.85738e-05	0.126189	2.18061e-07	OFF	Solid only	Solid_OFF
p1@LXN	0.639	0.627	0.608	0.985	1	0.965	1.85738e-05	1.65759e-07	3.76052e-13	OFF	Pan	Pan_OFF
p1@ZNF154	0.153	0.314	0.265	0.954	0.946	0.905	1.69443e-18	5.89956e-12	3.91805e-26	OFF	Pan	Pan_OFF
p2@IGFBP7	0.625	0.569	0.657	0.985	0.351	0.965	9.61612e-06	0.0690687	7.40704e-11	OFF	Solid only	Solid_OFF
p1@DNAJA4	0.375	0.333	0.549	0.969	0.986	0.965	4.43418e-11	5.41903e-14	4.20516e-16	OFF	Pan	Pan_OFF
p1@COL5A2	0.611	0.02	0.647	0.985	0.095	0.93	5.05393e-06	0.354098	3.82995e-08	OFF	Solid only	Solid_OFF
p1@ARMCX2	0.611	0.216	0.696	0.985	0.851	0.98	5.05393e-06	1.13012e-10	7.29123e-11	OFF	Pan	Pan_OFF
p1@TMEM220	0.583	0.235	0.559	0.985	0.811	0.965	1.26502e-06	9.29507e-09	1.33287e-15	OFF	Pan	Pan_OFF
p1@TIMP3	0.833	0.333	0.765	1	0.243	0.945	0.00683144	0.629099	0.000108347	OFF	Solid only	Solid_OFF
p1@MGST1	0.833	0.647	0.775	1	0.527	0.99	0.00683144	0.449149	1.09315e-08	OFF	Solid only	Solid_OFF
p1@ABLIM3	0.833	0.353	0.824	1	0.297	0.96	0.00683144	0.905325	0.000883889	OFF	Solid only	Solid_OFF
p1@FNDC4	0.833	0.176	0.824	1	0.216	0.96	0.00683144	1	0.000883889	OFF	Solid only	Solid_OFF
p1@C7orf13	0.833	0.824	0.902	1	0.878	0.99	0.00683144	0.765891	0.00262634	OFF	Solid only	Solid_OFF
p1@ENST00000545462,p1@uc003mmj.1	0.833	0.961	0.863	1	0.986	1	0.00683144	0.905325	1.9933e-06	OFF	Solid only	Solid_OFF
p3@NHP2L1	0.833	0.98	0.892	1	1	1	0.00683144	0.715385	4.46098e-05	OFF	Solid only	Solid_OFF
p1@BASP1	0.833	0.667	0.824	1	0.919	1	0.00683144	0.00476707	2.90667e-08	OFF	Pan	Pan_OFF
p1@PNPLA4	0.833	0.765	0.912	1	0.946	1	0.00683144	0.0242504	0.000336623	OFF	Solid only	Solid_OFF
p7@HIST1H3A,p7@HIST1H3B,p7@HIST1H3C,p7@HIST1H3D,p7@HIST1H3E,p7@HIST1H3F,p7@HIST1H3G,p7@HIST1H3I,p7@HIST1H3J,p8@HIST1H3H	0.833	0.941	0.882	1	1	0.99	0.00683144	0.189856	0.000464557	OFF	Solid only	Solid_OFF
p5@HIST1H2BE	0.833	0.784	0.824	1	0.986	1	0.00683144	0.00169902	2.90667e-08	OFF	Pan	Pan_OFF
p1@GALC	0.833	0.843	0.853	1	1	0.995	0.00683144	0.00379427	6.05566e-06	OFF	Pan	Pan_OFF
p2@BSCL2	0.833	0.725	0.824	1	1	1	0.00683144	2.03683e-05	2.90667e-08	OFF	Pan	Pan_OFF
p2@SPARC	0.819	0.627	0.696	1	0.514	0.99	0.00389653	0.562578	2.17711e-12	OFF	Solid only	Solid_OFF
p1@SIRPA	0.819	0.588	0.784	1	0.568	0.98	0.00389653	1	5.86535e-07	OFF	Solid only	Solid_OFF
p1@C10orf125	0.819	0.961	0.922	1	0.959	0.995	0.00389653	1	0.00454047	OFF	Solid only	Solid_OFF
p2@MYL9	0.819	0.392	0.745	1	0.676	0.99	0.00389653	0.0110861	4.84347e-10	OFF	Solid only	Solid_OFF
p1@LOC729678	0.819	0.922	0.882	1	0.973	0.995	0.00389653	0.491345	0.000114222	OFF	Solid only	Solid_OFF
p2@MGMT	0.819	0.627	0.922	1	0.946	0.995	0.00389653	0.000123289	0.00454047	OFF	Pan	Pan_OFF
p1@DUSP23	0.819	0.706	0.863	1	0.973	1	0.00389653	0.000268655	1.9933e-06	OFF	Pan	Pan_OFF
p1@CDKN2A	0.528	0.706	0.775	0.985	0.824	0.985	6.77199e-08	0.337077	5.50856e-08	OFF	Solid only	Solid_OFF
p1@CDKN2B	0.528	0.353	0.765	0.985	0.662	0.995	6.77199e-08	0.00613108	5.43484e-10	OFF	Solid only	Solid_OFF
p3@SPARC	0.806	0.529	0.706	1	0.311	0.975	0.00218712	0.0642527	8.67735e-10	OFF	Solid only	Solid_OFF
p2@MGST1	0.806	0.647	0.735	1	0.473	0.98	0.00218712	0.196424	4.38958e-09	OFF	Solid only	Solid_OFF
p1@FKBP11	0.806	0.627	0.725	1	0.865	0.995	0.00218712	0.0139409	6.90097e-12	OFF	Solid only	Solid_OFF
p1@ZFP82	0.806	0.863	0.745	1	0.959	0.97	0.00218712	0.240663	1.50201e-07	OFF	Solid only	Solid_OFF
p1@HTATIP2	0.806	0.804	0.863	1	1	1	0.00218712	0.000705251	1.9933e-06	OFF	Pan	Pan_OFF
p7@HIST1H4F	0.5	0.529	0.441	0.985	1	0.99	1.34011e-08	8.48752e-10	9.99484e-27	OFF	Pan	Pan_OFF
p1@VAMP5	0.5	0.392	0.51	0.985	1	0.965	1.34011e-08	1.76777e-13	3.30294e-18	OFF	Pan	Pan_OFF
p1@FADS2	0.792	0.824	0.755	1	0.662	0.98	0.00123901	0.189856	3.21051e-08	OFF	Solid only	Solid_OFF
p1@SPARC	0.792	0.627	0.775	1	0.622	0.995	0.00123901	1	1.59058e-09	OFF	Solid only	Solid_OFF
p2@TUSC1	0.792	0.255	0.824	1	0.257	0.965	0.00123901	1	0.000510361	OFF	Solid only	Solid_OFF
p1@MAST4	0.792	0.686	0.824	1	0.77	0.97	0.00123901	0.62271	0.000170095	OFF	Solid only	Solid_OFF
p1@MYL9	0.792	0.353	0.755	1	0.622	0.995	0.00123901	0.0188912	1.86106e-10	OFF	Solid only	Solid_OFF
p5@HIST1H4A,p5@HIST1H4B,p5@HIST1H4D,p5@HIST1H4E,p5@HIST1H4F,p5@HIST1H4H,p5@HIST1H4I,p5@HIST1H4J,p5@HIST1H4K,p5@HIST1H4L,p5@HIST2H4A,p5@HIST2H4B,p5@HIST4H4,p6@HIST1H4C	0.792	0.902	0.716	1	0.973	0.99	0.00123901	0.31126	1.93837e-11	OFF	Solid only	Solid_OFF
p1@GSPT2	0.792	0.804	0.676	1	0.946	1	0.00123901	0.0737289	1.47123e-15	OFF	Solid only	Solid_OFF
p1@RFTN1	0.792	0.922	0.745	1	0.986	0.995	0.00123901	0.37653	6.3372e-11	OFF	Solid only	Solid_OFF
p1@ZNF506	0.792	0.843	0.824	1	1	0.995	0.00123901	0.00379427	2.9022e-07	OFF	Pan	Pan_OFF
p1@ZNF626	0.792	0.569	0.578	1	0.986	0.995	0.00123901	8.01756e-08	1.30103e-19	OFF	Pan	Pan_OFF
p1@EIF4EBP3	0.792	0.765	0.716	1	1	1	0.00123901	0.000122719	1.58054e-13	OFF	Pan	Pan_OFF
p1@FRMD4A	0.778	0.373	0.755	1	0.122	0.95	0.000696221	0.0105162	1.80659e-05	OFF	Solid only	Solid_OFF
p1@PLD3	0.778	0.804	0.843	1	0.662	0.995	0.000696221	0.27851	2.22907e-06	OFF	Solid only	Solid_OFF
p3@PTGR1	0.778	0.275	0.735	1	0.243	0.965	0.000696221	1	1.78314e-07	OFF	Solid only	Solid_OFF
p1@TUSC1	0.778	0.294	0.853	1	0.541	0.985	0.000696221	0.0419484	0.000108347	OFF	Solid only	Solid_OFF
p1@HIST1H2BH	0.778	0.941	0.853	1	1	0.97	0.000696221	0.189856	0.002347	OFF	Solid only	Solid_OFF
p1@TMEM98	0.764	0.373	0.824	1	0.095	0.965	0.000384169	0.00203364	0.000510361	OFF	Solid only	Solid_OFF
p1@PLTP	0.764	0.549	0.735	1	0.23	0.96	0.000384169	0.00250035	5.00902e-07	OFF	Solid only	Solid_OFF
p1@DNAJC15	0.764	0.902	0.775	1	0.986	1	0.000384169	0.1314	1.30427e-10	OFF	Solid only	Solid_OFF
p1@KCTD12	0.764	0.627	0.863	1	0.946	0.99	0.000384169	0.000123289	7.63402e-05	OFF	Pan	Pan_OFF
p1@TPM2	0.75	0.294	0.804	1	0.351	0.97	0.000208808	0.905325	3.26814e-05	OFF	Solid only	Solid_OFF
p1@TNFRSF10D	0.75	0.765	0.863	1	0.986	1	0.000208808	0.000762035	1.9933e-06	OFF	Pan	Pan_OFF
p1@SRGN	0.736	1	0.49	1	1	0.98	0.000114494	1	1.11284e-21	OFF	Solid only	Solid_OFF
p1@PRKCDBP	0.736	0.216	0.716	1	0.5	0.975	0.000114494	0.00856952	2.36248e-09	OFF	Solid only	Solid_OFF
p1@MT1E	0.736	0.647	0.794	1	0.959	1	0.000114494	0.000127192	1.15114e-09	OFF	Pan	Pan_OFF
p3@FADS2	0.722	0.824	0.608	1	0.649	0.935	6.24826e-05	0.135232	3.53984e-10	OFF	Solid only	Solid_OFF
p1@A1BG	0.708	0.902	0.755	1	0.973	0.99	3.44344e-05	0.31126	1.38679e-09	OFF	Solid only	Solid_OFF
p1@BEX4	0.708	0.627	0.784	1	1	0.995	3.44344e-05	1.65759e-07	4.55965e-09	OFF	Pan	Pan_OFF
p1@MTAP	0.694	0.667	0.912	1	0.973	1	1.88047e-05	5.14978e-05	0.000336623	OFF	Pan	Pan_OFF
p1@GSTM2	0.694	0.745	0.696	1	0.986	1	1.88047e-05	0.000335931	1.56032e-14	OFF	Pan	Pan_OFF
p2@FAM65A	0.694	0.529	0.696	1	0.986	0.975	1.88047e-05	1.01649e-08	3.1215e-10	OFF	Pan	Pan_OFF
p1@TCEAL7	0.194	0.059	0.304	0.985	0.027	0.865	6.19981e-19	0.715385	1.70558e-19	OFF	Solid only	Solid_OFF
p1@NAPRT1	0.667	0.863	0.716	1	1	0.985	5.35267e-06	0.00843582	1.1899e-10	OFF	Pan	Pan_OFF
p1@ECHDC3	0.653	0.471	0.657	1	0.797	0.96	2.85286e-06	0.00177396	2.48715e-10	OFF	Solid only	Solid_OFF
p1@ZNF814	0.625	0.49	0.588	1	0.973	0.97	7.44573e-07	8.45574e-09	9.51714e-15	OFF	Pan	Pan_OFF
p1@GPX7	0.528	0.627	0.52	1	0.959	0.975	7.73156e-09	3.45303e-05	3.8558e-19	OFF	Pan	Pan_OFF
p1@MT1L,p1@MT1M	0.333	0.255	0.412	1	0.622	0.98	6.97715e-15	0.00060494	1.34375e-26	OFF	Solid only	Solid_OFF
p@chr17:41394342..41394365,+	0.514	0.51	0.373	0	0.054	0.035	5.13712e-10	1.96447e-07	3.15926e-12	ON	Pan	Pan_ON
p@chr1:46955478..46955489,+	0.417	0.157	0.431	0	0.014	0.02	9.24893e-08	0.0169242	3.11064e-17	ON	Solid only	Solid_ON
p@chr1:155947444..155947456,-	0.403	0.333	0.441	0	0.135	0.07	1.88049e-07	0.0557848	6.42098e-12	ON	Solid only	Solid_ON
p@chrX:86983649..86983684,-	0.389	0.137	0.402	0	0	0.005	3.82434e-07	0.00843582	1.7063e-18	ON	Pan	Pan_ON
p@chr17:41394202..41394213,+	0.347	0.373	0.343	0	0.054	0.035	2.85286e-06	0.000123289	7.40704e-11	ON	Pan	Pan_ON
p@chr7:123297861..123297866,-	0.333	0.353	0.471	0	0.176	0.05	5.35267e-06	0.115307	2.62727e-15	ON	Solid only	Solid_ON
p@chr11:34012712..34012718,+	0.319	0.569	0.216	0	0.041	0	1.00719e-05	1.73867e-09	3.87183e-10	ON	Pan	Pan_ON
p@chr12:92521923..92521946,-	0.319	0.333	0.412	0	0.568	0.065	1.00719e-05	0.0458938	4.93623e-11	ON	Solid only	Solid_ON
p@chr19:47937311..47937316,+	0.319	0.392	0.324	0	0.068	0.035	1.00719e-05	0.000220653	5.54096e-10	ON	Pan	Pan_ON
p@chr5:132002122..132002127,+	0.319	0.373	0.294	0	0.014	0.035	1.00719e-05	1.58101e-06	1.0497e-08	ON	Pan	Pan_ON
p@chr5:137814096..137814100,+	0.306	0.098	0.373	0	0.027	0.01	1.88047e-05	0.31126	7.49729e-16	ON	Solid only	Solid_ON
p@chr1:62928606..62928608,+	0.278	0.333	0.225	0	0.054	0.025	6.24826e-05	0.000584841	7.80588e-07	ON	Pan	Pan_ON
p@chr1:94616186..94616198,-	0.278	0	0.324	0	0	0.01	6.24826e-05	1	2.40514e-13	ON	Solid only	Solid_ON
p@chr17:41394254..41394265,+	0.278	0.333	0.265	0	0.014	0.01	6.24826e-05	1.00695e-05	1.67672e-10	ON	Pan	Pan_ON
p@chr6:23228836..23228864,+	0.278	0.098	0.147	0	0	0.01	6.24826e-05	0.0419484	2.99828e-05	ON	Solid only	Solid_ON
p@chr12:20975224..20975226,-	0.264	0	0.275	0	0	0	0.000114494	1	4.88914e-13	ON	Solid only	Solid_ON
p@chr19:54368876..54368891,+	0.264	0	0.265	0	0.014	0.035	0.000114494	1	1.78314e-07	ON	Solid only	Solid_ON
p@chrX:24151693..24151752,+	0.264	0	0.147	0	0	0.035	0.000114494	1	0.00384268	ON	Solid only	Solid_ON
p@chrX:92951215..92951233,+	0.264	0.157	0.284	0	0	0.01	0.000114494	0.00379427	1.93837e-11	ON	Pan	Pan_ON
p@chr10:129884160..129884163,-	0.25	0.353	0.275	0	0.041	0.015	0.000208808	0.000127192	3.39181e-10	ON	Pan	Pan_ON
p@chr11:62201182..62201189,-	0.25	0.196	0.127	0	0.027	0.025	0.000208808	0.0174873	0.00560429	ON	Solid only	Solid_ON
p@chr20:56030096..56030101,-	0.25	0.431	0.216	0	0.014	0.005	0.000208808	8.01756e-08	4.55965e-09	ON	Pan	Pan_ON
p@chr4:6310362..6310369,-	0.25	0.216	0.255	0	0.041	0.025	0.000208808	0.0169242	4.48207e-08	ON	Solid only	Solid_ON
p@chr6:3254635..3254642,+	0.25	0.333	0.363	0	0.014	0.035	0.000208808	1.00695e-05	9.08747e-12	ON	Pan	Pan_ON
p@chr7:50159852..50159856,+	0.25	0.588	0.206	0	0.068	0.03	0.000208808	1.91568e-08	1.38649e-05	ON	Pan	Pan_ON
p@chr2:88803506..88803509,+	0.236	0.196	0.245	0	0	0.035	0.000384169	0.000705251	1.10517e-06	ON	Pan	Pan_ON
p@chr22:21011504..21011510,+	0.236	0.196	0.176	0	0	0.005	0.000384169	0.000705251	2.9022e-07	ON	Pan	Pan_ON
p@chr5:5026027..5026038,-	0.236	0.118	0.137	0	0	0.025	0.000384169	0.0189529	0.00171496	ON	Solid only	Solid_ON
p@chrX:41213614..41213617,+	0.597	0.608	0.755	0.015	0.203	0.115	3.17295e-11	7.4811e-05	2.2645e-25	ON	Pan	Pan_ON
p@chr1:161392010..161392029,+	0.222	0.078	0.235	0	0	0.03	0.000696221	0.0902601	9.58293e-07	ON	Solid only	Solid_ON
p@chr14:106916169..106916203,+	0.222	0.118	0.137	0	0.014	0	0.000696221	0.0689176	1.9933e-06	ON	Solid only	Solid_ON
p@chr19:3562547..3562565,+	0.222	0	0.186	0	0.014	0.02	0.000696221	1	9.60372e-06	ON	Solid only	Solid_ON
p@chr19:3940330..3940332,-	0.222	0.118	0.245	0	0.027	0.015	0.000696221	0.187209	7.40778e-09	ON	Solid only	Solid_ON
p@chr5:178260112..178260119,+	0.222	0.176	0.176	0	0.014	0.005	0.000696221	0.00811506	2.9022e-07	ON	Pan	Pan_ON
p@chr8:47529241..47529249,-	0.222	0.118	0.235	0	0	0.045	0.000696221	0.0189529	2.09567e-05	ON	Solid only	Solid_ON
p@chr8:81124000..81124005,-	0.222	0.137	0.137	0	0	0	0.000696221	0.00843582	1.9933e-06	ON	Pan	Pan_ON
p@chrX:86983685..86983696,-	0.222	0.118	0.284	0	0	0	0.000696221	0.0189529	1.58054e-13	ON	Solid only	Solid_ON
p@chr1:156594357..156594402,+	0.208	0.098	0.176	0	0.014	0.01	0.00123901	0.1314	1.67878e-06	ON	Solid only	Solid_ON
p@chr1:207326648..207326670,+	0.208	0.02	0.196	0	0	0.01	0.00123901	0.715385	2.30922e-07	ON	Solid only	Solid_ON
p@chr11:66636028..66636036,-	0.208	0.373	0.275	0	0.014	0.01	0.00123901	1.58101e-06	5.76613e-11	ON	Pan	Pan_ON
p@chr12:123898207..123898212,-	0.208	0.333	0.176	0	0.027	0.02	0.00123901	5.14978e-05	2.35702e-05	ON	Pan	Pan_ON
p@chr13:64652944..64652956,+	0.208	0.176	0.235	0	0	0.005	0.00123901	0.00163962	5.43484e-10	ON	Pan	Pan_ON
p@chr16:2007750..2007753,-	0.208	0.157	0.098	0	0	0.005	0.00123901	0.00379427	0.000744758	ON	Pan	Pan_ON
p@chr17:39886117..39886121,-	0.208	0.039	0.275	0	0.027	0.03	0.00123901	1	2.23423e-08	ON	Solid only	Solid_ON
p@chr2:118380203..118380208,-	0.208	0.039	0.265	0	0	0.005	0.00123901	0.37653	2.09077e-11	ON	Solid only	Solid_ON
p@chr2:140168523..140168530,+	0.208	0.49	0.206	0	0	0.015	0.00123901	2.74444e-10	3.96639e-07	ON	Pan	Pan_ON
p@chr4:184647015..184647018,+	0.208	0.157	0.206	0	0	0.015	0.00123901	0.00379427	3.96639e-07	ON	Pan	Pan_ON
p@chr5:14578356..14578362,+	0.208	0.196	0.275	0	0.054	0.015	0.00123901	0.0737289	3.39181e-10	ON	Solid only	Solid_ON
p@chr5:28930096..28930106,+	0.208	0.02	0.255	0	0	0.015	0.00123901	0.715385	2.69076e-09	ON	Solid only	Solid_ON
p@chr7:57639694..57639702,+	0.208	0.118	0.167	0	0	0	0.00123901	0.0189529	8.37787e-08	ON	Solid only	Solid_ON
p@chr1:234728712..234728716,-	0.5	0.333	0.49	0.015	0.135	0.04	1.34011e-08	0.0557848	1.5819e-17	ON	Solid only	Solid_ON
p@chr10:71291404..71291416,+	0.194	0.039	0.078	0	0.014	0.005	0.00218712	0.905325	0.00454047	ON	Solid only	Solid_ON
p@chr12:73854074..73854088,+	0.194	0.137	0.196	0	0.027	0.005	0.00218712	0.104285	3.67531e-08	ON	Solid only	Solid_ON
p@chr13:64652914..64652935,+	0.194	0.196	0.255	0	0	0.025	0.00218712	0.000705251	4.48207e-08	ON	Pan	Pan_ON
p@chr14:28910171..28910172,+	0.194	0.059	0.127	0	0	0.01	0.00218712	0.189856	0.000190071	ON	Solid only	Solid_ON
p@chr15:79296531..79296547,-	0.194	0.118	0.196	0	0.041	0.045	0.00218712	0.37653	0.000392686	ON	Solid only	Solid_ON
p@chr18:56817987..56817990,+	0.194	0.373	0.265	0	0.189	0.045	0.00218712	0.0902601	1.29372e-06	ON	Solid only	Solid_ON
p@chr2:151313255..151313258,-	0.194	0.02	0.265	0	0	0	0.00218712	0.715385	1.51206e-12	ON	Solid only	Solid_ON
p@chr2:176962389..176962394,-	0.194	0.137	0.284	0	0	0.015	0.00218712	0.00843582	1.1899e-10	ON	Pan	Pan_ON
p@chr2:190089901..190089924,-	0.194	0.059	0.186	0	0.027	0.005	0.00218712	0.715385	1.03742e-07	ON	Solid only	Solid_ON
p@chr22:22892274..22892288,-	0.194	0.078	0.206	0	0	0	0.00218712	0.0902601	1.15114e-09	ON	Solid only	Solid_ON
p@chr7:57639397..57639403,-	0.194	0.137	0.186	0	0	0	0.00218712	0.00843582	9.89753e-09	ON	Pan	Pan_ON
p@chr8:128845956..128845967,+	0.194	0.275	0.206	0	0.054	0.045	0.00218712	0.0075579	0.000190377	ON	Pan	Pan_ON
p@chr8:47529304..47529311,-	0.194	0	0.157	0	0	0.02	0.00218712	1	0.000135298	ON	Solid only	Solid_ON
p@chr14:25501778..25501809,-	0.472	0.412	0.471	0.015	0.149	0.08	6.77199e-08	0.00884448	2.07187e-12	ON	Pan	Pan_ON
p@chr7:73140837..73140841,-	0.472	0.314	0.51	0.015	0.014	0.015	6.77199e-08	2.5753e-05	1.3367e-22	ON	Pan	Pan_ON
p@chr9:31848654..31848709,+	0.472	0.275	0.48	0.015	0	0.06	6.77199e-08	2.03683e-05	9.88761e-15	ON	Pan	Pan_ON
p@chr11:26618692..26618727,-	0.181	0.078	0.137	0	0.014	0.005	0.00389653	0.37653	1.63342e-05	ON	Solid only	Solid_ON
p@chr12:69975438..69975442,+	0.181	0.157	0.167	0	0.014	0.02	0.00389653	0.0169242	5.71022e-05	ON	Solid only	Solid_ON
p@chr13:19479391..19479398,-	0.181	0.216	0.225	0	0	0	0.00389653	0.000292888	1.30427e-10	ON	Pan	Pan_ON
p@chr13:64652316..64652321,-	0.181	0.157	0.196	0	0	0	0.00389653	0.00379427	3.42906e-09	ON	Pan	Pan_ON
p@chr17:1366641..1366652,-	0.181	0	0.108	0	0	0	0.00389653	1	4.46098e-05	ON	Solid only	Solid_ON
p@chr17:20807198..20807204,+	0.181	0.157	0.088	0	0	0	0.00389653	0.00379427	0.000336623	ON	Pan	Pan_ON
p@chr17:8620771..8620777,-	0.181	0.216	0.275	0	0.027	0.04	0.00389653	0.00919215	2.02665e-07	ON	Pan	Pan_ON
p@chr19:46440375..46440384,-	0.181	0.216	0.235	0	0	0.015	0.00389653	0.000292888	2.02691e-08	ON	Pan	Pan_ON
p@chr2:42481773..42481775,+	0.181	0.196	0.206	0	0.338	0.045	0.00389653	0.27851	0.000190377	ON	Solid only	Solid_ON
p@chr3:128579995..128580003,+	0.181	0.314	0.167	0	0.014	0.01	0.00389653	2.5753e-05	4.44554e-06	ON	Pan	Pan_ON
p@chr3:173650372..173650378,-	0.181	0.039	0.176	0	0	0.04	0.00389653	0.37653	0.000883889	ON	Solid only	Solid_ON
p@chr3:195542563..195542578,+	0.181	0	0.157	0	0	0.005	0.00389653	1	2.22907e-06	ON	Solid only	Solid_ON
p@chr6:19806783..19806789,-	0.181	0.078	0.137	0	0	0	0.00389653	0.0902601	1.9933e-06	ON	Solid only	Solid_ON
p@chr8:135473949..135473965,-	0.181	0.431	0.255	0	0.149	0.04	0.00389653	0.00511959	1.2188e-06	ON	Solid only	Solid_ON
p@chr8:135474085..135474097,-	0.181	0.235	0.176	0	0.108	0.01	0.00389653	0.22182	1.67878e-06	ON	Solid only	Solid_ON
p@chr19:38993559..38993562,-	0.458	0.294	0.441	0.015	0	0.015	1.37951e-07	7.92196e-06	1.30747e-18	ON	Pan	Pan_ON
p@chr11:65602705..65602719,-	0.444	0.373	0.49	0.015	0.081	0.025	2.94641e-07	0.000811787	1.03557e-19	ON	Pan	Pan_ON
p@chr4:44019085..44019092,-	0.444	0.176	0.539	0.015	0	0.005	2.94641e-07	0.00163962	1.02389e-26	ON	Pan	Pan_ON
p@chr12:19571344..19571348,+	0.167	0.02	0.108	0	0.014	0.02	0.00683144	1	0.00731585	ON	Solid only	Solid_ON
p@chr12:68900711..68900714,-	0.167	0.49	0.245	0	0.068	0.04	0.00683144	2.02373e-06	2.93286e-06	ON	Pan	Pan_ON
p@chr14:106938365..106938391,-	0.167	0.118	0.176	0	0.014	0.005	0.00683144	0.0689176	2.9022e-07	ON	Solid only	Solid_ON
p@chr18:31950808..31950811,-	0.167	0.059	0.069	0	0	0	0.00683144	0.189856	0.00241964	ON	Solid only	Solid_ON
p@chr19:38993672..38993677,-	0.167	0.255	0.294	0	0	0.005	0.00683144	5.14978e-05	7.61542e-13	ON	Pan	Pan_ON
p@chr2:81708841..81708850,+	0.167	0.118	0.314	0	0	0.01	0.00683144	0.0189529	7.26295e-13	ON	Solid only	Solid_ON
p@chr22:29464090..29464092,+	0.167	0.098	0.245	0	0	0.015	0.00683144	0.0419484	7.40778e-09	ON	Solid only	Solid_ON
p@chr22:34616800..34616810,+	0.167	0.176	0.176	0	0	0	0.00683144	0.00163962	2.90667e-08	ON	Pan	Pan_ON
p@chr3:196064462..196064471,-	0.167	0.137	0.059	0	0.041	0	0.00683144	0.240663	0.00634623	ON	Solid only	Solid_ON
p@chr3:37275339..37275344,+	0.167	0.176	0.108	0	0.014	0.01	0.00683144	0.00811506	0.00111389	ON	Pan	Pan_ON
p@chr5:180708225..180708231,-	0.167	0.118	0.294	0	0	0	0.00683144	0.0189529	5.07163e-14	ON	Solid only	Solid_ON
p@chr5:82271529..82271542,-	0.167	0.02	0.176	0	0	0.025	0.00683144	0.715385	6.78978e-05	ON	Solid only	Solid_ON
p@chr6:10661217..10661221,+	0.167	0.098	0.137	0	0.041	0.01	0.00683144	0.560247	7.63402e-05	ON	Solid only	Solid_ON
p@chr7:139227292..139227325,+	0.167	0.118	0.176	0	0	0.005	0.00683144	0.0189529	2.9022e-07	ON	Solid only	Solid_ON
p@chr7:23514264..23514271,+	0.167	0.373	0.314	0	0	0.005	0.00683144	1.65759e-07	8.00705e-14	ON	Pan	Pan_ON
p@chr8:110702059..110702061,-	0.167	0	0.127	0	0.027	0.01	0.00683144	0.846204	0.000190071	ON	Solid only	Solid_ON
p@chr9:14917631..14917635,-	0.167	0.078	0.137	0	0.014	0.03	0.00683144	0.37653	0.00444787	ON	Solid only	Solid_ON
p@chrX:56133848..56133855,+	0.167	0.059	0.265	0	0	0.005	0.00683144	0.189856	2.09077e-11	ON	Solid only	Solid_ON
p@chrX:92951202..92951214,+	0.167	0.098	0.225	0	0	0	0.00683144	0.0419484	1.30427e-10	ON	Solid only	Solid_ON
p@chr1:89358212..89358217,-	0.431	0.353	0.588	0.015	0.122	0.055	5.96813e-07	0.0178438	3.11359e-21	ON	Solid only	Solid_ON
p@chr3:46949816..46949827,-	0.431	0.51	0.5	0.015	0.108	0.035	5.96813e-07	2.18964e-05	9.57533e-19	ON	Pan	Pan_ON
p@chr8:146005409..146005412,-	0.431	0.294	0.412	0.015	0.122	0.045	5.96813e-07	0.07751	5.82076e-13	ON	Pan	Pan_ON
p@chr11:122916265..122916270,-	0.417	0.353	0.51	0.015	0.122	0.095	1.26502e-06	0.0178438	6.46824e-13	ON	Solid only	Solid_ON
p@chr12:57907395..57907397,-	0.417	0.255	0.48	0.015	0.095	0.035	1.26502e-06	0.0884956	1.14128e-17	ON	Solid only	Solid_ON
p@chr17:73763850..73763855,-	0.653	0.549	0.696	0.031	0.27	0.065	1.03456e-11	0.0139294	6.53061e-27	ON	Pan	Pan_ON
p@chr3:63982289..63982294,-	0.389	0.235	0.363	0.015	0.135	0.05	5.05393e-06	0.37653	3.1903e-10	ON	Solid only	Solid_ON
p@chr6:141219534..141219572,-	0.639	0.706	0.569	0.031	0.189	0.1	1.68233e-11	3.78297e-07	1.77897e-15	ON	Pan	Pan_ON
p@chr17:25416268..25416287,-	0.375	0.157	0.343	0.015	0	0.015	9.61612e-06	0.00379427	1.77076e-13	ON	Pan	Pan_ON
p@chr17:56706815..56706817,-	0.375	0.51	0.431	0.015	0.176	0.055	9.61612e-06	0.00129553	7.37686e-13	ON	Pan	Pan_ON
p@chr19:10530784..10530827,-	0.375	0.588	0.216	0.015	0.095	0.04	9.61612e-06	1.89861e-07	5.36478e-05	ON	Pan	Pan_ON
p@chr1:45196402..45196414,-	0.361	0.569	0.333	0.015	0.203	0.075	1.85738e-05	0.000502667	5.5486e-07	ON	Solid only	Solid_ON
p@chr6:31815396..31815402,+	0.361	0.373	0.461	0.015	0.108	0.05	1.85738e-05	0.00478331	8.31461e-15	ON	Pan	Pan_ON
p@chr1:189118891..189118896,+	0.347	0.216	0.324	0.015	0.014	0.04	2.16133e-05	0.00169902	1.80563e-09	ON	Pan	Pan_ON
p@chr2:71127508..71127528,-	0.347	0.098	0.441	0.015	0	0.03	2.16133e-05	0.0419484	2.95898e-16	ON	Solid only	Solid_ON
p@chr9:11065064..11065090,-	0.347	0.451	0.48	0.015	0	0.005	2.16133e-05	2.49582e-09	5.15502e-23	ON	Pan	Pan_ON
p@chr1:45970787..45970791,-	0.569	0.51	0.676	0.031	0.068	0.04	1.71315e-09	8.21316e-07	4.01495e-29	ON	Pan	Pan_ON
p@chr1:92951453..92951490,-	0.333	0.882	0.402	0.015	0.554	0.1	3.98353e-05	0.000762035	5.32805e-08	ON	Solid only	Solid_ON
p@chr17:25416565..25416581,+	0.333	0.176	0.225	0.015	0	0.005	3.98353e-05	0.00163962	1.59058e-09	ON	Pan	Pan_ON
p@chr5:103551489..103551493,+	0.333	0.196	0.324	0.015	0.027	0.015	3.98353e-05	0.0174873	1.61055e-12	ON	Solid only	Solid_ON
p@chr1:204355587..204355593,-	0.319	0.373	0.422	0.015	0.216	0.05	7.15057e-05	0.198154	6.69815e-13	ON	Solid only	Solid_ON
p@chr17:66077866..66077872,+	0.319	0.333	0.373	0.015	0.054	0.025	7.15057e-05	0.000584841	1.81854e-13	ON	Pan	Pan_ON
p@chr6:27286882..27286887,+	0.319	0.314	0.196	0.015	0.014	0	7.15057e-05	2.5753e-05	3.42906e-09	ON	Pan	Pan_ON
p@chr6:27760588..27760611,-	0.319	0.275	0.235	0.015	0.014	0.02	7.15057e-05	0.000141111	8.49428e-08	ON	Pan	Pan_ON
p@chr6:30871932..30871939,+	0.319	0	0.304	0.015	0.014	0.005	7.15057e-05	1	2.49629e-13	ON	Solid only	Solid_ON
p@chr7:93226477..93226489,+	0.319	0.118	0.451	0.015	0	0.005	7.15057e-05	0.0189529	2.737e-21	ON	Solid only	Solid_ON
p@chr1:151253709..151253725,-	0.528	0.765	0.588	0.031	0.541	0.145	1.93304e-08	0.0557888	6.56925e-13	ON	Solid only	Solid_ON
p@chr1:46955501..46955514,+	0.514	0.137	0.588	0.031	0.041	0.05	4.33584e-08	0.240663	7.2005e-22	ON	Solid only	Solid_ON
p@chr12:20975472..20975489,+	0.306	0	0.373	0.015	0	0.005	0.000128473	1	6.76635e-17	ON	Solid only	Solid_ON
p@chr14:90878128..90878132,+	0.306	0.255	0.255	0.015	0.027	0.02	0.000128473	0.0013282	1.18955e-08	ON	Pan	Pan_ON
p@chr19:6540235..6540238,+	0.306	0.51	0.461	0.015	0.176	0.105	0.000128473	0.00129553	7.55212e-10	ON	Solid only	Solid_ON
p@chr6:73356709..73356713,+	0.306	0.647	0.186	0.015	0.081	0.035	0.000128473	1.85266e-09	0.000264653	ON	Pan	Pan_ON
p@chr7:156788251..156788255,-	0.306	0.118	0.333	0.015	0	0.01	0.000128473	0.0189529	7.74425e-14	ON	Solid only	Solid_ON
p@chr8:127836882..127836885,+	0.306	0.137	0.284	0.015	0.203	0.04	0.000128473	0.807829	8.03851e-08	ON	Solid only	Solid_ON
p@chr4:83340946..83340953,-	0.5	0.627	0.529	0.031	0.122	0.07	9.3258e-08	2.03203e-07	3.23154e-16	ON	Pan	Pan_ON
p@chr1:230875702..230875707,-	0.292	0.235	0.186	0.015	0	0.005	0.000229491	0.000122719	1.03742e-07	ON	Pan	Pan_ON
p@chr12:124794715..124794717,-	0.292	0.039	0.216	0.015	0.162	0.03	0.000229491	0.135232	5.77548e-06	ON	Solid only	Solid_ON
p@chr17:56708375..56708402,-	0.292	0.353	0.284	0.015	0.122	0.025	0.000229491	0.0178438	2.36248e-09	ON	Solid only	Solid_ON
p@chr18:60262589..60262593,+	0.292	0.294	0.245	0.015	0.135	0.03	0.000229491	0.1314	3.80942e-07	ON	Solid only	Solid_ON
p@chr5:103595029..103595035,+	0.292	0.216	0.343	0.015	0	0.015	0.000229491	0.000292888	1.77076e-13	ON	Pan	Pan_ON
p@chr9:11065025..11065049,-	0.292	0.392	0.461	0.015	0	0.01	0.000229491	5.98153e-08	9.7799e-21	ON	Pan	Pan_ON
p@chr1:227165437..227165455,+	0.278	0.451	0.275	0.015	0.23	0.065	0.000407864	0.04655	1.67833e-05	ON	Solid only	Solid_ON
p@chr1:237634440..237634461,+	0.278	0.176	0.304	0.015	0	0.005	0.000407864	0.00163962	2.49629e-13	ON	Pan	Pan_ON
p@chr12:20975516..20975562,+	0.278	0	0.373	0.015	0	0.01	0.000407864	1	7.49729e-16	ON	Solid only	Solid_ON
p@chr20:48818205..48818210,+	0.278	0.118	0.343	0.015	0.041	0.045	0.000407864	0.37653	7.74539e-10	ON	Solid only	Solid_ON
p@chr6:20244428..20244434,-	0.278	0.314	0.275	0.015	0.027	0.015	0.000407864	0.00011842	3.39181e-10	ON	Pan	Pan_ON
p@chr6:27082917..27082922,-	0.278	0.235	0.225	0.015	0	0.02	0.000407864	0.000122719	2.26515e-07	ON	Pan	Pan_ON
p@chr6:28839955..28839961,-	0.278	0.333	0.304	0.015	0.041	0.01	0.000407864	0.000266962	2.17711e-12	ON	Pan	Pan_ON
p@chr1:32789697..32789702,-	0.458	0.49	0.647	0.031	0.216	0.045	8.50078e-07	0.0105162	2.43836e-26	ON	Pan	Pan_ON
p@chr7:127764786..127764789,+	0.458	0.471	0.52	0.031	0.419	0.085	8.50078e-07	0.930513	2.62098e-14	ON	Solid only	Solid_ON
p@chr17:8073688..8073690,-	0.611	0.431	0.49	0.046	0.122	0.075	1.37677e-09	0.00108412	9.0913e-14	ON	Pan	Pan_ON
p@chr13:111618030..111618074,+	0.444	0.314	0.471	0.031	0.122	0.05	1.67506e-06	0.0479333	2.62727e-15	ON	Solid only	Solid_ON
p@chr1:15563005..15563040,+	0.264	0.235	0.304	0.015	0.081	0.035	0.000714649	0.0759408	4.02277e-09	ON	Solid only	Solid_ON
p@chr1:204464458..204464469,-	0.264	0.392	0.324	0.015	0.054	0.02	0.000714649	5.76202e-05	8.52202e-12	ON	Pan	Pan_ON
p@chr1:239922495..239922501,+	0.264	0.176	0.314	0.015	0.068	0.035	0.000714649	0.224265	1.50836e-09	ON	Solid only	Solid_ON
p@chr1:68156847..68156850,-	0.264	0.039	0.167	0.015	0.041	0.03	0.000714649	1	0.000377933	ON	Solid only	Solid_ON
p@chr10:74386276..74386278,+	0.264	0.275	0.275	0.015	0.041	0.015	0.000714649	0.00225889	3.39181e-10	ON	Pan	Pan_ON
p@chr12:20910262..20910266,-	0.264	0.02	0.255	0.015	0.108	0.025	0.000714649	0.22182	4.48207e-08	ON	Solid only	Solid_ON
p@chr12:92515364..92515376,-	0.264	0.275	0.304	0.015	0.459	0.055	0.000714649	0.132622	3.31745e-07	ON	Solid only	Solid_ON
p@chr2:10477670..10477675,+	0.264	0.333	0.265	0.015	0	0.015	0.000714649	1.18637e-06	9.55444e-10	ON	Pan	Pan_ON
p@chr2:42722039..42722056,-	0.264	0.078	0.422	0.015	0	0.01	0.000714649	0.0902601	1.70377e-18	ON	Solid only	Solid_ON
p@chr9:11065050..11065061,-	0.264	0.373	0.304	0.015	0	0.005	0.000714649	1.65759e-07	2.49629e-13	ON	Pan	Pan_ON
p@chr1:150455305..150455309,+	0.431	0.431	0.461	0.031	0.081	0.05	3.30096e-06	8.72229e-05	8.31461e-15	ON	Pan	Pan_ON
p@chr1:25562748..25562750,-	0.431	0.51	0.49	0.031	0.081	0.085	3.30096e-06	3.57998e-06	6.71576e-13	ON	Pan	Pan_ON
p@chr16:53369716..53369719,+	0.431	0.392	0.353	0.031	0.068	0.035	3.30096e-06	0.000220653	2.62139e-11	ON	Pan	Pan_ON
p@chr19:14623559..14623561,-	0.417	0.373	0.431	0.031	0.23	0.065	6.14898e-06	0.284396	6.44437e-12	ON	Solid only	Solid_ON
p@chr1:203287425..203287433,+	0.25	0.216	0.265	0.015	0.162	0.03	0.00125897	0.825827	5.79822e-08	ON	Solid only	Solid_ON
p@chr1:27392741..27392745,+	0.25	0.353	0.333	0.015	0.014	0.01	0.00125897	3.99645e-06	7.74425e-14	ON	Pan	Pan_ON
p@chr15:40968603..40968609,-	0.25	0.49	0.216	0.015	0.014	0.015	0.00125897	3.39168e-09	1.4959e-07	ON	Pan	Pan_ON
p@chr16:21164864..21164874,+	0.25	0.373	0.216	0.015	0	0.01	0.00125897	1.65759e-07	3.04964e-08	ON	Pan	Pan_ON
p@chr17:8030284..8030295,-	0.25	0.216	0.304	0.015	0.041	0.03	0.00125897	0.0169242	1.18338e-09	ON	Solid only	Solid_ON
p@chr18:43690139..43690142,+	0.25	0.176	0.216	0.015	0.054	0.045	0.00125897	0.122873	9.16922e-05	ON	Solid only	Solid_ON
p@chr3:149079050..149079055,-	0.25	0.02	0.225	0.015	0.054	0.02	0.00125897	1	2.26515e-07	ON	Solid only	Solid_ON
p@chr6:30774805..30774811,-	0.25	0.176	0.235	0.015	0	0.04	0.00125897	0.00163962	6.91089e-06	ON	Pan	Pan_ON
p@chr7:101007057..101007077,-	0.25	0.02	0.206	0.015	0.041	0.005	0.00125897	1	1.29955e-08	ON	Solid only	Solid_ON
p@chr7:22293925..22293928,-	0.25	0.196	0.314	0.015	0.014	0.02	0.00125897	0.00379427	2.50896e-11	ON	Pan	Pan_ON
p@chr8:20094845..20094867,+	0.25	0.314	0.196	0.015	0.135	0.015	0.00125897	0.0873232	1.04445e-06	ON	Solid only	Solid_ON
p@chr9:133826616..133826622,+	0.25	0.157	0.275	0.015	0	0.015	0.00125897	0.00379427	3.39181e-10	ON	Pan	Pan_ON
p@chr10:70736840..70736843,+	0.403	0.627	0.471	0.031	0.5	0.08	1.17475e-05	0.447405	2.07187e-12	ON	Solid only	Solid_ON
p@chr3:129089363..129089382,-	0.403	0.333	0.382	0.031	0.419	0.085	1.17475e-05	0.702497	3.26698e-08	ON	Solid only	Solid_ON
p@chr1:155620616..155620623,+	0.236	0.059	0.127	0.015	0	0.025	0.00218712	0.189856	0.00560429	ON	Solid only	Solid_ON
p@chr1:192708615..192708631,-	0.236	0.059	0.353	0.015	0	0.02	0.00218712	0.189856	3.3204e-13	ON	Solid only	Solid_ON
p@chr1:93004036..93004045,+	0.236	0.608	0.196	0.015	0.041	0.035	0.00218712	1.69034e-10	8.03833e-05	ON	Pan	Pan_ON
p@chr12:123717296..123717307,-	0.236	0.255	0.265	0.015	0.041	0.045	0.00218712	0.00448015	1.29372e-06	ON	Pan	Pan_ON
p@chr13:46584866..46584872,-	0.236	0.314	0.353	0.015	0.068	0.03	0.00218712	0.00339099	6.80677e-12	ON	Pan	Pan_ON
p@chr2:178097789..178097794,+	0.236	0.216	0.255	0.015	0.311	0.04	0.00218712	0.619008	1.2188e-06	ON	Solid only	Solid_ON
p@chr5:167709436..167709444,+	0.236	0.098	0.078	0.015	0.027	0.005	0.00218712	0.31126	0.00454047	ON	Solid only	Solid_ON
p@chr7:156796258..156796263,-	0.236	0.294	0.402	0.015	0.014	0.015	0.00218712	6.21086e-05	1.73403e-16	ON	Pan	Pan_ON
p@chr9:7739875..7739879,-	0.236	0.196	0.275	0.015	0.014	0.005	0.00218712	0.00379427	6.90097e-12	ON	Pan	Pan_ON
p@chr1:16939157..16939162,+	0.389	0.294	0.441	0.031	0.041	0.06	2.31372e-05	0.00112466	7.79815e-13	ON	Pan	Pan_ON
p@chr6:141219511..141219524,-	0.389	0.588	0.363	0.031	0.122	0.055	2.31372e-05	1.34267e-06	9.08028e-10	ON	Pan	Pan_ON
p@chr9:97317164..97317174,-	0.681	0.216	0.735	0.062	0	0.06	5.41018e-11	0.000292888	1.60504e-30	ON	Pan	Pan_ON
p@chr1:150207353..150207364,+	0.375	0.667	0.51	0.031	0.554	0.095	4.28101e-05	0.560247	6.46824e-13	ON	Solid only	Solid_ON
p@chr16:28935344..28935348,-	0.375	0.431	0.333	0.031	0.068	0.02	4.28101e-05	2.85087e-05	2.90879e-12	ON	Pan	Pan_ON
p@chr16:46822055..46822056,-	0.375	0.549	0.343	0.031	0.176	0.075	4.28101e-05	0.000212806	2.58924e-07	ON	Solid only	Solid_ON
p@chr17:78105912..78105918,-	0.514	0.49	0.441	0.046	0.149	0.08	2.21823e-07	0.000510082	6.05422e-11	ON	Pan	Pan_ON
p@chr11:50143419..50143424,+	0.222	0.059	0.324	0.015	0	0.03	0.00381773	0.189856	1.57768e-10	ON	Solid only	Solid_ON
p@chr12:92507575..92507580,-	0.222	0.373	0.275	0.015	0.595	0.05	0.00381773	0.0690578	1.90662e-06	ON	Solid only	Solid_ON
p@chr14:89479733..89479748,+	0.222	0.059	0.275	0.015	0	0.015	0.00381773	0.189856	3.39181e-10	ON	Solid only	Solid_ON
p@chr17:74441186..74441189,+	0.222	0.157	0.196	0.015	0	0.025	0.00381773	0.00379427	1.19086e-05	ON	Pan	Pan_ON
p@chr21:20022871..20022875,-	0.222	0.216	0.127	0.015	0.027	0.03	0.00381773	0.00919215	0.00835856	ON	Pan	Pan_ON
p@chr22:42320192..42320195,-	0.222	0.431	0.353	0.015	0.23	0.03	0.00381773	0.0736197	6.80677e-12	ON	Solid only	Solid_ON
p@chr3:49625039..49625044,-	0.222	0.137	0.235	0.015	0	0.01	0.00381773	0.00843582	3.95113e-09	ON	Pan	Pan_ON
p@chr4:174189709..174189711,+	0.222	0.451	0.304	0.015	0.243	0.06	0.00381773	0.0750537	6.0406e-07	ON	Solid only	Solid_ON
p@chr6:28412624..28412629,-	0.222	0.353	0.216	0.015	0.027	0.01	0.00381773	2.11883e-05	3.04964e-08	ON	Pan	Pan_ON
p@chr6:28853797..28853808,+	0.222	0.353	0.176	0.015	0.108	0.02	0.00381773	0.00843582	2.35702e-05	ON	Solid only	Solid_ON
p@chr6:39160057..39160060,-	0.222	0.451	0.245	0.015	0.135	0.035	0.00381773	0.00130962	1.10517e-06	ON	Solid only	Solid_ON
p@chr6:7390948..7390952,-	0.222	0.392	0.167	0.015	0	0.025	0.00381773	5.98153e-08	0.000156311	ON	Pan	Pan_ON
p@chr7:82753269..82753271,-	0.222	0	0.147	0.015	0.027	0.025	0.00381773	0.846204	0.000785589	ON	Solid only	Solid_ON
p@chr8:99956472..99956483,-	0.222	0.275	0.294	0.015	0.068	0.06	0.00381773	0.0118685	1.378e-06	ON	Solid only	Solid_ON
p@chr9:139298063..139298070,-	0.222	0.529	0.186	0.015	0.432	0.045	0.00381773	0.710738	0.00124646	ON	Solid only	Solid_ON
p@chr19:39313478..39313484,+	0.5	0.51	0.441	0.046	0	0.04	4.73342e-07	8.66797e-11	5.72946e-15	ON	Pan	Pan_ON
p@chr1:98493062..98493066,-	0.361	0.157	0.333	0.031	0	0.04	7.88082e-05	0.00379427	6.73796e-10	ON	Pan	Pan_ON
p@chr12:104643832..104643839,-	0.361	0.157	0.304	0.031	0.014	0.055	7.88082e-05	0.0169242	3.31745e-07	ON	Solid only	Solid_ON
p@chr17:5522731..5522749,-	0.361	0.373	0.412	0.031	0.095	0.065	7.88082e-05	0.00203364	4.93623e-11	ON	Solid only	Solid_ON
p@chr19:10530880..10530900,-	0.361	0.686	0.333	0.031	0.095	0.065	7.88082e-05	5.5257e-10	1.01909e-07	ON	Pan	Pan_ON
p@chr20:30182835..30182854,-	0.361	0	0.235	0.031	0	0.05	7.88082e-05	1	3.90974e-05	ON	Solid only	Solid_ON
p@chr7:100963860..100963864,+	0.361	0.098	0.402	0.031	0.027	0.055	7.88082e-05	0.31126	1.69051e-11	ON	Solid only	Solid_ON
p@chr1:70017534..70017566,+	0.208	0.196	0.245	0.015	0	0.01	0.00645597	0.000705251	1.38679e-09	ON	Pan	Pan_ON
p@chr11:120746761..120746773,+	0.208	0.216	0.147	0.015	0.014	0.01	0.00645597	0.00169902	2.99828e-05	ON	Pan	Pan_ON
p@chr14:20946654..20946657,+	0.208	0.157	0.196	0.015	0.189	0.025	0.00645597	1	1.19086e-05	ON	Solid only	Solid_ON
p@chr17:25424113..25424116,+	0.208	0.118	0.167	0.015	0.041	0.01	0.00645597	0.37653	4.44554e-06	ON	Solid only	Solid_ON
p@chr19:55657948..55657959,-	0.208	0.157	0.137	0.015	0.041	0.03	0.00645597	0.152881	0.00444787	ON	Solid only	Solid_ON
p@chr21:9829088..9829099,+	0.208	0.078	0.235	0.015	0	0	0.00645597	0.0902601	4.30185e-11	ON	Solid only	Solid_ON
p@chr5:170739239..170739274,+	0.208	0.137	0.216	0.015	0.027	0.045	0.00645597	0.104285	9.16922e-05	ON	Solid only	Solid_ON
p@chr8:135473404..135473420,-	0.208	0.196	0.176	0.015	0.189	0.03	0.00645597	1	0.000170095	ON	Solid only	Solid_ON
p@chrX:118055533..118055540,-	0.208	0.373	0.245	0.015	0	0.015	0.00645597	1.65759e-07	7.40778e-09	ON	Pan	Pan_ON
p@chr5:138930120..138930127,+	0.347	0.549	0.373	0.031	0.095	0.02	0.000145777	1.19163e-06	3.53892e-14	ON	Pan	Pan_ON
p@chr7:23516382..23516385,-	0.347	0.373	0.441	0.031	0	0.005	0.000145777	1.65759e-07	9.85444e-21	ON	Pan	Pan_ON
p@chr22:35833928..35833932,+	0.611	0.706	0.52	0.062	0.149	0.04	7.5147e-09	2.44751e-08	3.5878e-19	ON	Pan	Pan_ON
p@chr7:100992765..100992768,+	0.611	0.608	0.618	0.062	0.014	0.03	7.5147e-09	2.7842e-12	9.99484e-27	ON	Pan	Pan_ON
p@chr2:177293887..177293895,+	0.472	0.647	0.373	0.046	0.122	0.035	1.90221e-06	7.9017e-08	3.15926e-12	ON	Pan	Pan_ON
p@chr7:100035869..100035875,+	0.472	0.49	0.588	0.046	0.243	0.06	1.90221e-06	0.0318392	1.18058e-20	ON	Solid only	Solid_ON
p@chr1:94007993..94008000,-	0.333	0.078	0.294	0.031	0.054	0.035	0.000265547	1	1.0497e-08	ON	Solid only	Solid_ON
p@chr18:74587496..74587504,+	0.333	0.294	0.373	0.031	0.095	0.03	0.000265547	0.0336089	8.02464e-13	ON	Solid only	Solid_ON
p@chr19:5434724..5434729,-	0.333	0.373	0.265	0.031	0.027	0.025	0.000265547	8.5104e-06	1.70207e-08	ON	Pan	Pan_ON
p@chr5:178259821..178259898,-	0.333	0.353	0.314	0.031	0	0	0.000265547	4.43031e-07	4.90996e-15	ON	Pan	Pan_ON
p@chr5:38660663..38660667,+	0.333	0.02	0.422	0.031	0	0.025	0.000265547	0.715385	6.10089e-16	ON	Solid only	Solid_ON
p@chr6:21021022..21021027,+	0.333	0.373	0.5	0.031	0.432	0.075	0.000265547	0.923854	3.02059e-14	ON	Solid only	Solid_ON
p@chr8:135473823..135473861,-	0.333	0.412	0.324	0.031	0.257	0.065	0.000265547	0.22182	2.3769e-07	ON	Solid only	Solid_ON
p@chr2:220065580..220065587,-	0.444	0.667	0.471	0.046	0.365	0.105	6.79726e-06	0.00680545	1.78849e-10	ON	Pan	Pan_ON
p@chr20:30165727..30165728,-	0.444	0.412	0.52	0.046	0.176	0.08	6.79726e-06	0.0213796	9.35707e-15	ON	Solid only	Solid_ON
p@chr3:195771058..195771063,-	0.444	0.647	0.569	0.046	0.243	0.08	6.79726e-06	0.000111776	2.60926e-17	ON	Solid only	Solid_ON
p@chr3:46949789..46949808,-	0.569	0.667	0.608	0.062	0.351	0.065	5.02663e-08	0.00410751	3.31764e-21	ON	Pan	Pan_ON
p@chr9:98788825..98788851,+	0.569	0.569	0.657	0.062	0.311	0.11	5.02663e-08	0.0259059	1.82126e-19	ON	Solid only	Solid_ON
p@chr2:174557411..174557430,+	0.319	0.098	0.471	0.031	0	0.045	0.000483412	0.0419484	7.05108e-16	ON	Solid only	Solid_ON
p@chr2:209230722..209230723,+	0.319	0.51	0.392	0.031	0.095	0.055	0.000483412	7.27981e-06	4.66841e-11	ON	Pan	Pan_ON
p@chr3:183947382..183947395,+	0.319	0.176	0.333	0.031	0.014	0.03	0.000483412	0.00811506	5.62013e-11	ON	Pan	Pan_ON
p@chr7:211894..211898,-	0.319	0.255	0.314	0.031	0	0.02	0.000483412	5.14978e-05	2.50896e-11	ON	Pan	Pan_ON
p@chr6:133144725..133144727,+	0.431	0.431	0.471	0.046	0.162	0.1	1.28642e-05	0.00706491	9.19421e-11	ON	Solid only	Solid_ON
p@chr7:158515809..158515827,-	0.431	0.549	0.451	0.046	0.392	0.09	1.28642e-05	0.268121	1.01654e-10	ON	Solid only	Solid_ON
p@chr11:73499170..73499182,-	0.306	0.412	0.314	0.031	0.122	0.025	0.000859257	0.002087	1.12692e-10	ON	Solid only	Solid_ON
p@chr2:78613532..78613536,-	0.306	0.235	0.392	0.031	0.014	0.025	0.000859257	0.000762035	1.94802e-14	ON	Pan	Pan_ON
p@chr5:103497150..103497154,+	0.306	0.176	0.353	0.031	0	0.005	0.000859257	0.00163962	7.56593e-16	ON	Pan	Pan_ON
p@chr9:37468820..37468838,-	0.306	0.098	0.196	0.031	0	0.02	0.000859257	0.0419484	3.8429e-06	ON	Solid only	Solid_ON
p@chr9:97253706..97253709,-	0.542	0.275	0.559	0.062	0	0.035	2.21823e-07	2.03683e-05	3.39676e-22	ON	Pan	Pan_ON
p@chr12:74794757..74794765,-	0.417	0.176	0.392	0.046	0.108	0.04	2.48979e-05	0.611111	1.39968e-12	ON	Solid only	Solid_ON
p@chr7:21924786..21924790,-	0.417	0.529	0.382	0.046	0.216	0.095	2.48979e-05	0.00356743	1.51958e-07	ON	Solid only	Solid_ON
p@chr1:37791753..37791757,+	0.653	0.588	0.686	0.077	0.014	0.045	1.9591e-09	9.63119e-12	4.53271e-29	ON	Pan	Pan_ON
p@chr17:2220497..2220501,-	0.639	0.549	0.588	0.077	0.216	0.095	5.29813e-09	0.00196037	5.89158e-17	ON	Solid only	Solid_ON
p@chr16:392073..392077,+	0.403	0.627	0.451	0.046	0.081	0.095	4.60651e-05	5.46239e-09	2.97546e-10	ON	Pan	Pan_ON
p@chr19:40675597..40675603,-	0.403	0.353	0.431	0.046	0	0.035	4.60651e-05	4.43031e-07	4.33877e-15	ON	Pan	Pan_ON
p@chr1:234732589..234732593,-	0.625	0.706	0.696	0.077	0.297	0.07	1.16642e-08	0.000123289	2.52576e-26	ON	Pan	Pan_ON
p@chr12:92517978..92517981,-	0.514	0.373	0.52	0.062	0.77	0.11	9.57411e-07	0.000168824	3.13416e-12	ON	Solid only	Solid_ON
p@chr1:59249602..59249617,+	0.389	0.235	0.382	0.046	0.054	0.07	8.38495e-05	0.0242504	3.03776e-09	ON	Solid only	Solid_ON
p@chr17:74724316..74724318,-	0.389	0.471	0.559	0.046	0.149	0.08	8.38495e-05	0.00101023	8.76005e-17	ON	Pan	Pan_ON
p@chr1:237634391..237634405,+	0.278	0.235	0.294	0.031	0	0.005	0.00162216	0.000122719	7.61542e-13	ON	Pan	Pan_ON
p@chr12:116356689..116356694,-	0.278	0.431	0.245	0.031	0.068	0.01	0.00162216	2.85087e-05	1.38679e-09	ON	Pan	Pan_ON
p@chr12:13383342..13383346,+	0.278	0.039	0.314	0.031	0.014	0.055	0.00162216	0.905325	1.61843e-07	ON	Solid only	Solid_ON
p@chr14:103603686..103603710,+	0.278	0.078	0.186	0.031	0.189	0.045	0.00162216	0.31126	0.00124646	ON	Solid only	Solid_ON
p@chr20:34996608..34996612,-	0.278	0.176	0.275	0.031	0	0.025	0.00162216	0.00163962	6.38439e-09	ON	Pan	Pan_ON
p@chr3:108582723..108582727,+	0.278	0	0.206	0.031	0	0.005	0.00162216	1	1.29955e-08	ON	Solid only	Solid_ON
p@chr3:115824309..115824311,-	0.278	0	0.373	0.031	0	0.045	0.00162216	1	3.85404e-11	ON	Solid only	Solid_ON
p@chr3:75719617..75719625,+	0.278	0.196	0.255	0.031	0.068	0.05	0.00162216	0.148582	8.40656e-06	ON	Solid only	Solid_ON
p@chr4:100575781..100575801,-	0.278	0.137	0.176	0.031	0	0.01	0.00162216	0.00843582	1.67878e-06	ON	Pan	Pan_ON
p@chr4:85123402..85123406,-	0.278	0.078	0.294	0.031	0.014	0.025	0.00162216	0.37653	8.67735e-10	ON	Solid only	Solid_ON
p@chr1:153969752..153969755,+	0.597	0.647	0.667	0.077	0.189	0.085	6.52182e-08	6.2259e-06	1.46394e-22	ON	Pan	Pan_ON
p@chr19:49997405..49997411,+	0.806	0.784	0.804	0.108	0.378	0.18	4.85382e-13	0.000122719	6.79704e-23	ON	Solid only	Solid_ON
p@chr8:124349289..124349294,-	0.486	0.686	0.52	0.062	0.27	0.105	3.66861e-06	0.000110925	1.14527e-12	ON	Solid only	Solid_ON
p@chr20:55924311..55924317,+	0.375	0.608	0.5	0.046	0.122	0.07	0.000153974	5.2804e-07	1.0195e-14	ON	Pan	Pan_ON
p@chr3:195802025..195802031,-	0.375	0.745	0.392	0.046	0.338	0.075	0.000153974	0.000129057	2.46276e-09	ON	Solid only	Solid_ON
p@chr6:115319294..115319336,+	0.375	0.314	0.333	0.046	0.446	0.07	0.000153974	0.432593	2.18061e-07	ON	Solid only	Solid_ON
p@chr6:73344775..73344779,+	0.375	0.627	0.265	0.046	0.095	0.05	0.000153974	2.956e-08	3.96918e-06	ON	Pan	Pan_ON
p@chr7:112108336..112108339,+	0.375	0.373	0.373	0.046	0.297	0.09	0.000153974	0.764813	2.08647e-07	ON	Solid only	Solid_ON
p@chr15:69750859..69750863,+	0.472	0.569	0.608	0.062	0.068	0.09	6.79726e-06	4.82694e-08	1.68785e-18	ON	Pan	Pan_ON
p@chr19:10824760..10824764,+	0.472	0.373	0.49	0.062	0.176	0.085	6.79726e-06	0.0773915	6.71576e-13	ON	Solid only	Solid_ON
p@chr9:137902025..137902030,-	0.472	0.529	0.52	0.062	0.041	0.07	6.79726e-06	1.59051e-08	1.01734e-15	ON	Pan	Pan_ON
p@chr1:60314072..60314088,+	0.264	0.059	0.216	0.031	0.041	0.02	0.00275041	1	5.86535e-07	ON	Solid only	Solid_ON
p@chr14:77172660..77172667,-	0.264	0.255	0.294	0.031	0.027	0.04	0.00275041	0.0013282	3.16714e-08	ON	Pan	Pan_ON
p@chr15:65597587..65597600,-	0.264	0.157	0.225	0.031	0	0.015	0.00275041	0.00379427	5.50856e-08	ON	Pan	Pan_ON
p@chr19:2393146..2393152,+	0.264	0.667	0.304	0.031	0.014	0.02	0.00275041	5.41903e-14	7.29123e-11	ON	Pan	Pan_ON
p@chr2:208528667..208528672,+	0.264	0.451	0.196	0.031	0.054	0.02	0.00275041	4.82479e-06	3.8429e-06	ON	Pan	Pan_ON
p@chr2:30677499..30677504,+	0.264	0.373	0.402	0.031	0.284	0.05	0.00275041	0.662871	5.4995e-12	ON	Solid only	Solid_ON
p@chr22:48309685..48309689,+	0.264	0.176	0.441	0.031	0.027	0.045	0.00275041	0.0326248	2.19944e-14	ON	Solid only	Solid_ON
p@chr5:103543025..103543026,+	0.264	0.255	0.373	0.031	0.014	0.015	0.00275041	0.000335931	5.84898e-15	ON	Pan	Pan_ON
p@chr6:162361762..162361765,+	0.264	0.196	0.108	0.031	0	0.015	0.00275041	0.000705251	0.00315423	ON	Pan	Pan_ON
p@chr6:31820606..31820612,+	0.264	0.235	0.206	0.031	0.041	0.015	0.00275041	0.00859904	3.96639e-07	ON	Pan	Pan_ON
p@chr19:572242..572266,-	0.569	0.765	0.647	0.077	0.662	0.14	3.03418e-07	0.514724	2.54072e-16	ON	Solid only	Solid_ON
p@chr2:113425862..113425864,+	0.361	0.176	0.363	0.046	0.095	0.065	0.000276972	0.424604	8.88175e-09	ON	Solid only	Solid_ON
p@chr5:78546489..78546494,+	0.361	0.392	0.392	0.046	0.581	0.075	0.000276972	0.145195	2.46276e-09	ON	Solid only	Solid_ON
p@chr5:173615558..173615565,-	0.458	0.451	0.431	0.062	0.027	0.015	1.28642e-05	1.90078e-07	4.34614e-18	ON	Pan	Pan_ON
p@chr21:32949557..32949562,-	0.347	0.196	0.314	0.046	0.027	0.025	0.000492501	0.0174873	1.12692e-10	ON	Solid only	Solid_ON
p@chr3:129089204..129089226,-	0.347	0.314	0.275	0.046	0.338	0.065	0.000492501	1	1.67833e-05	ON	Solid only	Solid_ON
p@chr1:46511316..46511318,+	0.639	0.686	0.686	0.092	0.338	0.16	1.86387e-08	0.00124753	5.66369e-17	ON	Solid only	Solid_ON
p@chr10:75173177..75173185,+	0.542	0.51	0.578	0.077	0.595	0.08	8.77394e-07	0.715385	7.36618e-18	ON	Solid only	Solid_ON
p@chr1:239593098..239593102,+	0.25	0.039	0.137	0.031	0	0.02	0.00465171	0.37653	0.000718255	ON	Solid only	Solid_ON
p@chr12:69754055..69754064,+	0.25	0.431	0.275	0.031	0.135	0.065	0.00465171	0.00242443	1.67833e-05	ON	Solid only	Solid_ON
p@chr15:41254685..41254691,+	0.25	0.412	0.304	0.031	0	0.025	0.00465171	2.08212e-08	3.1215e-10	ON	Pan	Pan_ON
p@chr17:41116393..41116402,-	0.25	0.392	0.284	0.031	0.162	0.045	0.00465171	0.0285963	2.20029e-07	ON	Solid only	Solid_ON
p@chr18:57647728..57647732,+	0.25	0.235	0.255	0.031	0	0.005	0.00465171	0.000122719	6.3372e-11	ON	Pan	Pan_ON
p@chr2:198315897..198315903,+	0.25	0.333	0.304	0.031	0.054	0.035	0.00465171	0.000584841	4.02277e-09	ON	Pan	Pan_ON
p@chr2:220718359..220718366,+	0.25	0.118	0.284	0.031	0.081	0.03	0.00465171	0.891391	8.48152e-09	ON	Solid only	Solid_ON
p@chr3:127347780..127347822,-	0.25	0.118	0.304	0.031	0.014	0.005	0.00465171	0.0689176	2.49629e-13	ON	Solid only	Solid_ON
p@chr4:41936411..41936427,+	0.25	0.137	0.255	0.031	0.203	0.02	0.00465171	0.807829	1.18955e-08	ON	Solid only	Solid_ON
p@chr6:28926723..28926729,+	0.25	0.49	0.255	0.031	0	0.015	0.00465171	2.74444e-10	2.69076e-09	ON	Pan	Pan_ON
p@chr8:145560721..145560729,-	0.25	0.098	0.422	0.031	0	0.02	0.00465171	0.0419484	1.04076e-16	ON	Solid only	Solid_ON
p@chr8:62635269..62635276,+	0.25	0	0.167	0.031	0.054	0.04	0.00465171	0.356783	0.00176684	ON	Solid only	Solid_ON
p@chr5:27490524..27490527,+	0.444	0.412	0.373	0.062	0.014	0.055	2.46214e-05	2.21213e-07	3.41952e-10	ON	Pan	Pan_ON
p@chr19:5352533..5352545,+	0.625	0.294	0.5	0.092	0.054	0.1	4.36407e-08	0.00250035	3.77187e-12	ON	Pan	Pan_ON
p@chr12:65228510..65228513,+	0.333	0.196	0.412	0.046	0.176	0.045	0.000860459	1	5.82076e-13	ON	Solid only	Solid_ON
p@chr15:41628867..41628870,+	0.333	0.471	0.343	0.046	0.095	0.035	0.000860459	6.43266e-05	7.40704e-11	ON	Pan	Pan_ON
p@chr16:18944204..18944211,-	0.333	0.137	0.186	0.046	0	0.015	0.000860459	0.00843582	2.73116e-06	ON	Pan	Pan_ON
p@chr2:30821860..30821869,+	0.431	0.412	0.49	0.062	0.23	0.07	4.49287e-05	0.147432	3.11327e-14	ON	Solid only	Solid_ON
p@chr2:8826713..8826716,+	0.333	0.392	0.343	0.046	0.189	0.075	0.000860459	0.057975	2.58924e-07	ON	Solid only	Solid_ON
p@chr6:26923959..26923962,-	0.333	0.608	0.412	0.046	0.135	0.05	0.000860459	1.76478e-06	1.92064e-12	ON	Pan	Pan_ON
p@chr9:101552164..101552169,+	0.333	0.294	0.314	0.046	0	0.06	0.000860459	7.92196e-06	2.67701e-07	ON	Pan	Pan_ON
p@chrX:41191720..41191725,+	0.333	0.451	0.333	0.046	0.081	0.05	0.000860459	4.03894e-05	5.79981e-09	ON	Pan	Pan_ON
p@chr12:92525764..92525779,-	0.611	0.569	0.706	0.092	0.865	0.125	1.00373e-07	0.00242443	4.29236e-21	ON	Solid only	Solid_ON
p@chr6:89800068..89800073,+	0.514	0.529	0.598	0.077	0.351	0.14	3.33724e-06	0.189856	8.55212e-14	ON	Solid only	Solid_ON
p@chr7:5650757..5650761,+	0.514	0.255	0.598	0.077	0.068	0.095	3.33724e-06	0.0214112	1.79331e-17	ON	Solid only	Solid_ON
p@chrX:24026984..24026989,-	0.514	0.549	0.549	0.077	0.257	0.105	3.33724e-06	0.00810913	5.05605e-14	ON	Solid only	Solid_ON
p@chr13:24528328..24528353,-	0.236	0.118	0.206	0.031	0	0.01	0.00773749	0.0189529	8.37787e-08	ON	Solid only	Solid_ON
p@chr14:62632713..62632717,+	0.236	0.039	0.255	0.031	0	0.02	0.00773749	0.37653	1.18955e-08	ON	Solid only	Solid_ON
p@chr2:154889397..154889401,+	0.236	0	0.196	0.031	0.041	0.035	0.00773749	0.560247	8.03833e-05	ON	Solid only	Solid_ON
p@chr2:7125423..7125427,+	0.236	0.333	0.108	0.031	0.149	0.015	0.00773749	0.0677288	0.00315423	ON	Solid only	Solid_ON
p@chr2:78693147..78693150,-	0.236	0.176	0.343	0.031	0.041	0.035	0.00773749	0.0574022	7.40704e-11	ON	Solid only	Solid_ON
p@chr2:81710247..81710252,+	0.236	0.176	0.363	0.031	0.054	0.025	0.00773749	0.122873	5.44016e-13	ON	Solid only	Solid_ON
p@chr2:9695380..9695397,+	0.236	0.314	0.167	0.031	0.243	0.04	0.00773749	0.731626	0.00176684	ON	Solid only	Solid_ON
p@chr3:141659306..141659320,+	0.236	0.02	0.382	0.031	0.014	0.055	0.00773749	1	1.28206e-10	ON	Solid only	Solid_ON
p@chr3:14658573..14658581,+	0.236	0.078	0.255	0.031	0	0.02	0.00773749	0.0902601	1.18955e-08	ON	Solid only	Solid_ON
p@chr7:32519192..32519195,-	0.236	0.235	0.304	0.031	0.027	0.015	0.00773749	0.00282546	1.40062e-11	ON	Pan	Pan_ON
p@chr7:87609613..87609616,+	0.236	0.412	0.284	0.031	0.081	0.015	0.00773749	0.000189286	1.1899e-10	ON	Pan	Pan_ON
p@chr1:45196157..45196161,-	0.597	0.725	0.471	0.092	0.432	0.11	2.21613e-07	0.00998952	4.86716e-10	ON	Solid only	Solid_ON
p@chr13:100148554..100148559,-	0.417	0.216	0.333	0.062	0.392	0.055	8.1587e-05	0.157479	1.54305e-08	ON	Solid only	Solid_ON
p@chr17:43579400..43579402,-	0.417	0.529	0.392	0.062	0.27	0.085	8.1587e-05	0.022527	1.44353e-08	ON	Solid only	Solid_ON
p@chr7:96452346..96452352,-	0.417	0.196	0.304	0.062	0.027	0.03	8.1587e-05	0.0174873	1.18338e-09	ON	Solid only	Solid_ON
p@chr1:150953891..150953894,+	0.319	0	0.255	0.046	0	0.045	0.00150745	1	5.24718e-06	ON	Solid only	Solid_ON
p@chr14:102765041..102765048,+	0.319	0.49	0.294	0.046	0.095	0.06	0.00150745	1.71188e-05	1.378e-06	ON	Pan	Pan_ON
p@chr19:23732661..23732689,+	0.319	0	0.304	0.046	0	0.075	0.00150745	1	5.72715e-06	ON	Solid only	Solid_ON
p@chr19:40004305..40004309,+	0.319	0.157	0.275	0.046	0.027	0.055	0.00150745	0.0588014	3.41524e-06	ON	Solid only	Solid_ON
p@chr19:6604094..6604121,-	0.319	0.745	0.392	0.046	0.486	0.07	0.00150745	0.0251395	1.36887e-09	ON	Solid only	Solid_ON
p@chr20:8612715..8612716,+	0.319	0.235	0.451	0.046	0.189	0.095	0.00150745	1	2.97546e-10	ON	Solid only	Solid_ON
p@chr5:135072878..135072883,-	0.319	0.02	0.402	0.046	0	0.055	0.00150745	0.715385	1.69051e-11	ON	Solid only	Solid_ON
p@chr5:58607323..58607326,-	0.319	0.275	0.324	0.046	0.081	0.05	0.00150745	0.026335	1.48296e-08	ON	Solid only	Solid_ON
p@chr9:33036276..33036279,+	0.5	0.412	0.5	0.077	0.392	0.115	6.20169e-06	1	6.32432e-11	ON	Solid only	Solid_ON
p@chr6:26167298..26167303,+	0.583	0.529	0.647	0.092	0.041	0.09	4.88036e-07	1.59051e-08	7.98006e-21	ON	Pan	Pan_ON
p@chr9:133565693..133565699,+	0.667	0.431	0.657	0.108	0	0.145	1.24314e-08	7.48694e-09	1.7355e-16	ON	Pan	Pan_ON
p@chr14:91365643..91365647,-	0.403	0.51	0.441	0.062	0.568	0.11	0.000147146	0.929911	6.33539e-09	ON	Solid only	Solid_ON
p@chr17:48208895..48208897,-	0.403	0.745	0.431	0.062	0.257	0.095	0.000147146	2.11226e-06	1.66542e-09	ON	Pan	Pan_ON
p@chr2:26710312..26710316,-	0.403	0.196	0.363	0.062	0.068	0.05	0.000147146	0.148582	3.1903e-10	ON	Solid only	Solid_ON
p@chrX:129133051..129133054,+	0.403	0.373	0.382	0.062	0.081	0.095	0.000147146	0.000811787	1.51958e-07	ON	Pan	Pan_ON
p@chrX:24019917..24019920,-	0.403	0.471	0.471	0.062	0.311	0.11	0.000147146	0.245122	4.86716e-10	ON	Solid only	Solid_ON
p@chr1:156417689..156417693,-	0.486	0.49	0.451	0.077	0.108	0.09	1.17475e-05	4.9704e-05	1.01654e-10	ON	Pan	Pan_ON
p@chr1:94616071..94616075,-	0.306	0.039	0.255	0.046	0.014	0.035	0.00260022	0.905325	4.48653e-07	ON	Solid only	Solid_ON
p@chr12:8015610..8015616,+	0.306	0.608	0.353	0.046	0.5	0.08	0.00260022	0.568461	2.05313e-07	ON	Solid only	Solid_ON
p@chr13:24289325..24289337,+	0.306	0.157	0.304	0.046	0.014	0.06	0.00260022	0.0169242	6.0406e-07	ON	Solid only	Solid_ON
p@chr2:37862449..37862461,-	0.306	0.176	0.324	0.046	0.324	0.06	0.00260022	0.261006	1.20483e-07	ON	Solid only	Solid_ON
p@chr6:154707166..154707170,-	0.306	0.118	0.294	0.046	0	0.065	0.00260022	0.0189529	4.10558e-06	ON	Solid only	Solid_ON
p@chr7:99698411..99698426,+	0.306	0.255	0.275	0.046	0.054	0.05	0.00260022	0.0136018	1.90662e-06	ON	Solid only	Solid_ON
p@chr1:180199013..180199018,-	0.389	0.275	0.431	0.062	0.081	0.075	0.000262154	0.026335	4.67534e-11	ON	Solid only	Solid_ON
p@chr1:53345758..53345763,+	0.389	0.294	0.402	0.062	0.068	0.025	0.000262154	0.00639395	6.21534e-15	ON	Pan	Pan_ON
p@chr10:45464593..45464607,-	0.472	0.294	0.51	0.077	0	0.115	2.25012e-05	7.92196e-06	2.82735e-11	ON	Pan	Pan_ON
p@chr19:28193258..28193262,-	0.472	0.333	0.392	0.077	0.054	0.04	2.25012e-05	0.000584841	1.39968e-12	ON	Pan	Pan_ON
p@chr17:79874727..79874731,+	0.542	0.275	0.529	0.092	0.122	0.125	4.29914e-06	0.12087	1.23493e-11	ON	Solid only	Solid_ON
p@chr1:230558595..230558601,-	0.292	0.51	0.343	0.046	0.014	0.02	0.00445251	1.13605e-09	9.94551e-13	ON	Pan	Pan_ON
p@chr13:100622496..100622512,-	0.292	0.078	0.284	0.046	0	0.04	0.00445251	0.0902601	8.03851e-08	ON	Solid only	Solid_ON
p@chr19:47793168..47793181,+	0.292	0.059	0.235	0.046	0	0.05	0.00445251	0.189856	3.90974e-05	ON	Solid only	Solid_ON
p@chr19:49105940..49105943,-	0.292	0.314	0.402	0.046	0.014	0.025	0.00445251	2.5753e-05	6.21534e-15	ON	Pan	Pan_ON
p@chr2:74442369..74442400,+	0.292	0.275	0.422	0.046	0.081	0.05	0.00445251	0.026335	6.69815e-13	ON	Solid only	Solid_ON
p@chr20:19095317..19095322,+	0.292	0.294	0.225	0.046	0.027	0.055	0.00445251	0.000268655	0.000206586	ON	Pan	Pan_ON
p@chr20:62124546..62124576,-	0.292	0.078	0.245	0.046	0.014	0.03	0.00445251	0.37653	3.80942e-07	ON	Solid only	Solid_ON
p@chr21:9831035..9831065,+	0.292	0.118	0.235	0.046	0.014	0.03	0.00445251	0.0689176	9.58293e-07	ON	Solid only	Solid_ON
p@chr4:768133..768138,+	0.292	0.373	0.275	0.046	0.162	0.04	0.00445251	0.0445891	2.02665e-07	ON	Solid only	Solid_ON
p@chr5:134241225..134241230,+	0.292	0.49	0.343	0.046	0.284	0.04	0.00445251	0.0869955	2.48715e-10	ON	Solid only	Solid_ON
p@chr5:56112862..56112871,-	0.292	0.314	0.235	0.046	0.122	0.025	0.00445251	0.0479333	3.03792e-07	ON	Solid only	Solid_ON
p@chr1:156616442..156616457,-	0.458	0.294	0.373	0.077	0.014	0.05	4.09095e-05	6.21086e-05	1.1899e-10	ON	Pan	Pan_ON
p@chr1:3356218..3356223,+	0.458	0.275	0.51	0.077	0	0.02	4.09095e-05	2.03683e-05	1.11284e-21	ON	Pan	Pan_ON
p@chr13:30066531..30066552,-	0.458	0.471	0.529	0.077	0.081	0.035	4.09095e-05	1.82624e-05	1.79108e-20	ON	Pan	Pan_ON
p@chr5:103552623..103552625,+	0.458	0.216	0.549	0.077	0.068	0.04	4.09095e-05	0.0927683	7.09588e-21	ON	Solid only	Solid_ON
p@chr6:56311952..56311957,-	0.528	0.235	0.529	0.092	0.014	0.11	8.27909e-06	0.000762035	1.27158e-12	ON	Pan	Pan_ON
p@chr11:128826294..128826298,-	0.444	0.196	0.539	0.077	0.122	0.05	7.48616e-05	0.629098	5.3189e-19	ON	Solid only	Solid_ON
p@chr17:42853016..42853027,-	0.444	0.588	0.431	0.077	0.162	0.06	7.48616e-05	1.92345e-05	2.21471e-12	ON	Solid only	Solid_ON
p@chr3:49507014..49507019,-	0.444	0.157	0.402	0.077	0	0.02	7.48616e-05	0.00379427	1.09621e-15	ON	Pan	Pan_ON
p@chr2:128053540..128053542,-	0.681	0.588	0.667	0.123	0.514	0.13	1.81848e-08	0.800694	3.30294e-18	ON	Solid only	Solid_ON
p@chr11:77530594..77530600,+	0.361	0.569	0.392	0.062	0.284	0.095	0.000816681	0.00963217	7.06444e-08	ON	Solid only	Solid_ON
p@chr4:139135635..139135651,-	0.361	0.255	0.314	0.062	0.095	0.075	0.000816681	0.0884956	2.63993e-06	ON	Solid only	Solid_ON
p@chr7:93354655..93354659,+	0.361	0.176	0.461	0.062	0.054	0.03	0.000816681	0.122873	2.65403e-17	ON	Solid only	Solid_ON
p@chr9:90330470..90330474,+	0.361	0.333	0.382	0.062	0.068	0.075	0.000816681	0.00169902	5.97548e-09	ON	Pan	Pan_ON
p@chr9:98245687..98245692,-	0.361	0.471	0.422	0.062	0.081	0.085	0.000816681	1.82624e-05	7.62075e-10	ON	Pan	Pan_ON
p@chr12:104760413..104760416,+	0.597	0.373	0.569	0.108	0.135	0.08	7.11869e-07	0.0139409	2.60926e-17	ON	Solid only	Solid_ON
p@chr1:21055891..21055895,+	0.278	0.196	0.304	0.046	0.014	0.035	0.0074589	0.00379427	4.02277e-09	ON	Pan	Pan_ON
p@chr1:228783293..228783309,-	0.278	0.059	0.314	0.046	0	0.035	0.0074589	0.189856	1.50836e-09	ON	Solid only	Solid_ON
p@chr1:27473788..27473791,-	0.278	0.373	0.382	0.046	0.149	0.09	0.0074589	0.0256039	1.03382e-07	ON	Solid only	Solid_ON
p@chr10:88106150..88106156,+	0.278	0.039	0.284	0.046	0	0.005	0.0074589	0.37653	2.2886e-12	ON	Solid only	Solid_ON
p@chr11:134124618..134124622,-	0.278	0.412	0.304	0.046	0.135	0.04	0.0074589	0.00442057	1.2303e-08	ON	Solid only	Solid_ON
p@chr12:69653866..69653876,+	0.278	0.157	0.225	0.046	0.054	0.03	0.0074589	0.196424	2.37177e-06	ON	Solid only	Solid_ON
p@chr13:111382943..111382945,+	0.278	0.255	0.304	0.046	0.027	0.02	0.0074589	0.0013282	7.29123e-11	ON	Pan	Pan_ON
p@chr14:102601172..102601178,-	0.278	0.412	0.353	0.046	0.027	0.02	0.0074589	1.33918e-06	3.3204e-13	ON	Pan	Pan_ON
p@chr18:10565390..10565394,+	0.278	0.412	0.324	0.046	0.135	0.06	0.0074589	0.00442057	1.20483e-07	ON	Solid only	Solid_ON
p@chr4:91453996..91454005,-	0.278	0.216	0.304	0.046	0	0.01	0.0074589	0.000292888	2.17711e-12	ON	Pan	Pan_ON
p@chr6:11029286..11029291,-	0.278	0.059	0.206	0.046	0.027	0.035	0.0074589	0.715385	3.52737e-05	ON	Solid only	Solid_ON
p@chr6:170475650..170475682,-	0.278	0.255	0.431	0.046	0.068	0.02	0.0074589	0.0214112	3.11064e-17	ON	Solid only	Solid_ON
p@chr8:127881773..127881775,+	0.278	0.059	0.245	0.046	0.257	0.05	0.0074589	0.0198808	1.80659e-05	ON	Solid only	Solid_ON
p@chr9:127360918..127360927,-	0.278	0.588	0.392	0.046	0.068	0.02	0.0074589	1.91568e-08	3.58979e-15	ON	Pan	Pan_ON
p@chrX:10159759..10159765,+	0.278	0.275	0.294	0.046	0.135	0.06	0.0074589	0.189856	1.378e-06	ON	Solid only	Solid_ON
p@chr19:9250545..9250553,-	0.431	0.608	0.431	0.077	0.243	0.085	0.000133943	0.000713648	2.97966e-10	ON	Pan	Pan_ON
p@chr8:95926354..95926357,+	0.431	0.588	0.461	0.077	0.243	0.095	0.000133943	0.00135257	1.32664e-10	ON	Solid only	Solid_ON
p@chr11:66491308..66491313,+	0.583	0.431	0.529	0.108	0.014	0.035	1.46941e-06	8.01756e-08	1.79108e-20	ON	Pan	Pan_ON
p@chr11:64818680..64818685,+	0.5	0.471	0.451	0.092	0	0.05	1.95414e-05	8.48752e-10	2.54046e-14	ON	Pan	Pan_ON
p@chr16:89768636..89768649,+	0.347	0.392	0.539	0.062	0.527	0.105	0.00139838	0.367073	1.41487e-13	ON	Solid only	Solid_ON
p@chr17:15787326..15787329,-	0.347	0.569	0.294	0.062	0.23	0.04	0.00139838	0.00132707	3.16714e-08	ON	Solid only	Solid_ON
p@chr22:48104590..48104594,+	0.347	0.275	0.529	0.062	0.014	0.025	0.00139838	0.000141111	5.50116e-22	ON	Pan	Pan_ON
p@chr7:56074800..56074801,-	0.347	0.333	0.402	0.062	0.054	0.045	0.00139838	0.000584841	1.69186e-12	ON	Pan	Pan_ON
p@chr7:96635740..96635773,-	0.347	0.137	0.529	0.062	0.014	0.075	0.00139838	0.0345876	9.91736e-16	ON	Solid only	Solid_ON
p@chr4:69169370..69169376,-	0.417	0.392	0.529	0.077	0.203	0.035	0.00023836	0.0912569	1.79108e-20	ON	Solid only	Solid_ON
p@chrX:48379794..48379808,-	0.417	0.686	0.52	0.077	0.135	0.08	0.00023836	1.94268e-08	9.35707e-15	ON	Pan	Pan_ON
p@chr14:103812611..103812615,+	0.639	0.667	0.686	0.123	0.568	0.14	2.21557e-07	0.69606	1.50307e-18	ON	Solid only	Solid_ON
p@chr8:128914686..128914701,+	0.639	0.549	0.539	0.123	0.216	0.11	2.21557e-07	0.00196037	5.40631e-13	ON	Solid only	Solid_ON
p@chr1:169112530..169112531,+	0.486	0.196	0.588	0.092	0.216	0.06	3.53596e-05	1	1.18058e-20	ON	Solid only	Solid_ON
p@chr16:9085975..9085982,+	0.486	0.49	0.48	0.092	0.014	0.055	3.53596e-05	3.39168e-09	2.9359e-15	ON	Pan	Pan_ON
p@chr6:57195192..57195197,+	0.486	0.51	0.529	0.092	0.324	0.11	3.53596e-05	0.136038	1.27158e-12	ON	Solid only	Solid_ON
p@chr9:101552135..101552140,+	0.486	0.353	0.5	0.092	0.014	0.06	3.53596e-05	3.99645e-06	9.91736e-16	ON	Pan	Pan_ON
p@chr11:70217660..70217687,-	0.708	0.353	0.725	0.138	0.027	0.16	1.11465e-08	2.11883e-05	2.61124e-19	ON	Pan	Pan_ON
p@chr1:3650500..3650504,+	0.333	0.373	0.373	0.062	0.108	0.05	0.00239681	0.00478331	1.1899e-10	ON	Solid only	Solid_ON
p@chr10:95575127..95575132,+	0.333	0.235	0.363	0.062	0.054	0.06	0.00239681	0.0242504	2.41632e-09	ON	Pan	Pan_ON
p@chr12:69106435..69106441,+	0.333	0.608	0.451	0.062	0.257	0.045	0.00239681	0.000923597	7.10686e-15	ON	Solid only	Solid_ON
p@chr15:52228372..52228406,-	0.333	0.333	0.235	0.062	0.054	0.055	0.00239681	0.000584841	0.000108347	ON	Pan	Pan_ON
p@chr6:43727334..43727337,+	0.333	0.314	0.451	0.062	0	0.035	0.00239681	3.119e-06	4.20516e-16	ON	Pan	Pan_ON
p@chr15:75746723..75746749,+	0.403	0.451	0.461	0.077	0.635	0.105	0.000414506	0.145195	7.55212e-10	ON	Solid only	Solid_ON
p@chr16:68561738..68561744,+	0.403	0.412	0.461	0.077	0.054	0.06	0.000414506	2.5753e-05	9.12356e-14	ON	Pan	Pan_ON
p@chr2:174562443..174562467,+	0.403	0.118	0.549	0.077	0.014	0.095	0.000414506	0.0689176	6.71632e-15	ON	Solid only	Solid_ON
p@chr8:106807833..106807836,-	0.403	0	0.304	0.077	0.014	0.07	0.000414506	1	3.15306e-06	ON	Solid only	Solid_ON
p@chr9:37188163..37188178,+	0.403	0.49	0.284	0.077	0.311	0.07	0.000414506	0.185465	1.41601e-05	ON	Solid only	Solid_ON
p@chrX:118343594..118343601,-	0.472	0.471	0.539	0.092	0	0.035	6.32677e-05	8.48752e-10	5.01189e-21	ON	Pan	Pan_ON
p@chr21:34952766..34952770,-	0.542	0.569	0.657	0.108	0.351	0.16	1.14583e-05	0.0690687	2.82669e-15	ON	Solid only	Solid_ON
p@chr12:31457050..31457054,-	0.458	0.667	0.559	0.092	0.473	0.09	0.000114094	0.139547	7.58626e-16	ON	Solid only	Solid_ON
p@chr19:54383325..54383336,+	0.458	0.353	0.48	0.092	0.176	0.055	0.000114094	0.115307	2.9359e-15	ON	Solid only	Solid_ON
p@chr1:24691948..24691953,+	0.389	0.353	0.324	0.077	0.014	0.05	0.000716642	3.99645e-06	1.48296e-08	ON	Pan	Pan_ON
p@chr9:124328237..124328240,+	0.389	0.275	0.451	0.077	0	0.03	0.000716642	2.03683e-05	8.79689e-17	ON	Pan	Pan_ON
p@chr1:229041596..229041602,-	0.319	0.451	0.304	0.062	0.014	0.055	0.00399301	2.87213e-08	3.31745e-07	ON	Pan	Pan_ON
p@chr12:54133160..54133164,-	0.319	0.137	0.284	0.062	0.014	0.045	0.00399301	0.0345876	2.20029e-07	ON	Solid only	Solid_ON
p@chr14:37799928..37799932,+	0.319	0.059	0.275	0.062	0.014	0.035	0.00399301	0.613325	7.04675e-08	ON	Solid only	Solid_ON
p@chr14:65233114..65233131,-	0.319	0.294	0.275	0.062	0	0.065	0.00399301	7.92196e-06	1.67833e-05	ON	Pan	Pan_ON
p@chr18:36999060..36999063,-	0.319	0.137	0.304	0.062	0	0.025	0.00399301	0.00843582	3.1215e-10	ON	Pan	Pan_ON
p@chr3:187544115..187544118,-	0.319	0.275	0.441	0.062	0.176	0.04	0.00399301	0.438049	5.72946e-15	ON	Solid only	Solid_ON
p@chr3:192363553..192363555,-	0.319	0.059	0.314	0.062	0.027	0.01	0.00399301	0.715385	7.26295e-13	ON	Solid only	Solid_ON
p@chr6:7724035..7724039,-	0.319	0.353	0.284	0.062	0.095	0.065	0.00399301	0.00387061	8.22755e-06	ON	Solid only	Solid_ON
p@chrX:118129290..118129323,+	0.319	0.275	0.225	0.062	0.284	0.055	0.00399301	1	0.000206586	ON	Solid only	Solid_ON
p@chr1:234535844..234535849,-	0.597	0.627	0.618	0.123	0.392	0.12	2.13171e-06	0.0458225	2.54072e-16	ON	Solid only	Solid_ON
p@chr8:29973082..29973088,+	0.597	0.765	0.569	0.123	0.635	0.14	2.13171e-06	0.386279	2.57635e-12	ON	Solid only	Solid_ON
p@chr14:21101221..21101225,+	0.528	0.353	0.471	0.108	0	0.105	2.26231e-05	4.43031e-07	1.78849e-10	ON	Pan	Pan_ON
p@chr8:124403722..124403725,-	0.736	0.882	0.745	0.154	0.622	0.16	9.13802e-09	0.0105741	1.7781e-20	ON	Solid only	Solid_ON
p@chr1:16175912..16175918,-	0.653	0.588	0.706	0.138	0.527	0.125	2.98041e-07	0.92884	4.29236e-21	ON	Solid only	Solid_ON
p@chr7:23360260..23360264,-	0.653	0.588	0.725	0.138	0.068	0.125	2.98041e-07	1.91568e-08	2.3513e-22	ON	Pan	Pan_ON
p@chr12:104759029..104759033,+	0.583	0.294	0.471	0.123	0.122	0.045	4.25626e-06	0.07751	7.05108e-16	ON	Solid only	Solid_ON
p@chr8:48785785..48785789,-	0.583	0.804	0.608	0.123	0.324	0.115	4.25626e-06	2.82385e-06	3.69046e-16	ON	Solid only	Solid_ON
p@chr17:42147547..42147551,-	0.444	0.294	0.471	0.092	0.041	0.045	0.00020422	0.00112466	7.05108e-16	ON	Pan	Pan_ON
p@chr2:174809545..174809549,-	0.444	0.549	0.422	0.092	0.459	0.095	0.00020422	0.715385	4.03088e-09	ON	Solid only	Solid_ON
p@chr6:64284450..64284464,+	0.444	0.314	0.304	0.092	0.068	0.05	0.00020422	0.00339099	9.26868e-08	ON	Pan	Pan_ON
p@chr1:46568472..46568476,-	0.514	0.51	0.588	0.108	0.095	0.14	4.26494e-05	7.27981e-06	2.44262e-13	ON	Pan	Pan_ON
p@chr5:126205297..126205298,+	0.514	0.627	0.49	0.108	0.257	0.1	4.26494e-05	0.000461523	1.71246e-11	ON	Solid only	Solid_ON
p@chr7:155109664..155109679,+	0.514	0.588	0.559	0.108	0.257	0.085	4.26494e-05	0.00264045	2.68092e-16	ON	Pan	Pan_ON
p@chr10:97441949..97441951,-	0.375	0.176	0.294	0.077	0.216	0.07	0.00124547	1	6.65577e-06	ON	Solid only	Solid_ON
p@chr17:45253914..45253921,+	0.375	0.588	0.304	0.077	0.068	0.04	0.00124547	1.91568e-08	1.2303e-08	ON	Pan	Pan_ON
p@chr20:62120496..62120507,-	0.375	0.098	0.235	0.077	0	0.025	0.00124547	0.0419484	3.03792e-07	ON	Solid only	Solid_ON
p@chr6:28983846..28983850,+	0.431	0.471	0.382	0.092	0.216	0.085	0.000358041	0.0178296	3.26698e-08	ON	Solid only	Solid_ON
p@chr6:41339961..41339966,-	0.431	0.275	0.471	0.092	0.068	0.025	0.000358041	0.0118685	1.44775e-18	ON	Pan	Pan_ON
p@chr1:207507851..207507864,+	0.361	0.275	0.363	0.077	0.432	0.08	0.00211854	0.243068	9.1444e-08	ON	Solid only	Solid_ON
p@chr10:104846929..104846933,+	0.361	0.353	0.431	0.077	0.257	0.1	0.00211854	0.638683	5.16157e-09	ON	Solid only	Solid_ON
p@chr11:1481707..1481713,+	0.361	0.078	0.255	0.077	0.054	0.035	0.00211854	1	4.48653e-07	ON	Solid only	Solid_ON
p@chr4:35023031..35023049,-	0.361	0	0.294	0.077	0	0.005	0.00211854	1	7.61542e-13	ON	Solid only	Solid_ON
p@chr6:120490182..120490186,+	0.361	0.118	0.333	0.077	0.081	0.06	0.00211854	0.891391	5.53628e-08	ON	Solid only	Solid_ON
p@chr6:28833661..28833666,-	0.556	0.863	0.608	0.123	0.527	0.135	1.58899e-05	0.000888328	1.11798e-14	ON	Pan	Pan_ON
p@chr16:3018930..3018943,-	0.681	0.51	0.676	0.154	0.108	0.1	1.83766e-07	2.18964e-05	1.26831e-21	ON	Pan	Pan_ON
p@chr17:4611904..4611909,-	0.486	0.706	0.598	0.108	0.568	0.13	9.36784e-05	0.345674	1.52955e-14	ON	Solid only	Solid_ON
p@chr16:57717053..57717056,-	0.611	0.725	0.569	0.138	0.014	0.055	2.85286e-06	8.00342e-16	4.3736e-20	ON	Pan	Pan_ON
p@chr2:120451243..120451249,+	0.611	0.608	0.569	0.138	0.23	0.08	2.85286e-06	0.000342784	2.60926e-17	ON	Solid only	Solid_ON
p@chr7:97486925..97486929,-	0.611	0.569	0.735	0.138	0.189	0.175	2.85286e-06	0.00022571	9.72755e-19	ON	Pan	Pan_ON
p@chrX:53398164..53398167,-	0.611	0.647	0.549	0.138	0.351	0.12	2.85286e-06	0.0103327	6.62572e-13	ON	Solid only	Solid_ON
p@chr22:35834037..35834042,+	0.417	0.569	0.51	0.092	0.189	0.065	0.000621951	0.00022571	1.01734e-15	ON	Solid only	Solid_ON
p@chr8:128908649..128908661,+	0.417	0.392	0.284	0.092	0.027	0.03	0.000621951	3.43776e-06	8.48152e-09	ON	Pan	Pan_ON
p@chr18:37059984..37059996,-	0.542	0.235	0.451	0.123	0.054	0.1	3.00851e-05	0.0242504	5.49882e-10	ON	Solid only	Solid_ON
p@chr9:35767302..35767304,+	0.542	0.804	0.657	0.123	0.608	0.135	3.00851e-05	0.101841	2.74387e-17	ON	Solid only	Solid_ON
p@chr20:9079545..9079556,+	0.347	0.02	0.225	0.077	0	0.05	0.00358336	0.715385	8.37455e-05	ON	Solid only	Solid_ON
p@chr12:49691431..49691450,+	0.403	0.275	0.412	0.092	0.054	0.085	0.00106763	0.0075579	3.12238e-09	ON	Pan	Pan_ON
p@chr2:65657904..65657913,-	0.403	0.529	0.529	0.092	0.284	0.125	0.00106763	0.0369966	1.23493e-11	ON	Solid only	Solid_ON
p@chr21:37336501..37336505,+	0.403	0.216	0.324	0.092	0	0.08	0.00106763	0.000292888	3.41524e-06	ON	Pan	Pan_ON
p@chr3:149096538..149096558,-	0.403	0	0.255	0.092	0	0.025	0.00106763	1	4.48207e-08	ON	Solid only	Solid_ON
p@chr3:193877020..193877026,+	0.403	0.216	0.49	0.092	0	0.065	0.00106763	0.000292888	1.0195e-14	ON	Pan	Pan_ON
p@chr5:77765709..77765714,-	0.403	0.157	0.402	0.092	0.041	0.06	0.00106763	0.152881	4.87394e-11	ON	Solid only	Solid_ON
p@chr11:70122391..70122398,+	0.528	0.431	0.559	0.123	0.405	0.115	5.57193e-05	1	1.35527e-13	ON	Solid only	Solid_ON
p@chr13:100632825..100632879,-	0.764	0.412	0.637	0.185	0	0.085	1.11465e-08	2.08212e-08	9.50902e-21	ON	Pan	Pan_ON
p@chr1:167189406..167189444,+	0.458	0.804	0.52	0.108	0.135	0.07	0.000291351	7.06958e-12	1.01734e-15	ON	Pan	Pan_ON
p@chr15:56311515..56311555,+	0.458	0.118	0.5	0.108	0.014	0.09	0.000291351	0.0689176	9.39377e-13	ON	Solid only	Solid_ON
p@chr8:11693476..11693481,-	0.458	0.216	0.373	0.108	0.243	0.06	0.000291351	1	9.3021e-10	ON	Solid only	Solid_ON
p@chr1:167189728..167189737,-	0.639	0.804	0.627	0.154	0.243	0.115	1.82484e-06	3.55304e-08	2.60926e-17	ON	Pan	Pan_ON
p@chr10:121076886..121076894,+	0.333	0.078	0.324	0.077	0	0.05	0.00586133	0.0902601	1.48296e-08	ON	Solid only	Solid_ON
p@chr10:75329657..75329660,-	0.333	0.157	0.324	0.077	0.027	0.055	0.00586133	0.0588014	3.8294e-08	ON	Solid only	Solid_ON
p@chr6:111503536..111503545,+	0.333	0.412	0.324	0.077	0.365	0.075	0.00586133	1	1.20502e-06	ON	Solid only	Solid_ON
p@chr8:135474031..135474061,-	0.333	0.49	0.382	0.077	0.365	0.08	0.00586133	0.441831	2.00141e-08	ON	Solid only	Solid_ON
p@chr5:94039344..94039348,+	0.514	0.549	0.539	0.123	0.27	0.075	0.000103941	0.0139294	3.11356e-16	ON	Solid only	Solid_ON
p@chr17:80290234..80290270,+	0.569	0.216	0.52	0.138	0.054	0.085	2.10903e-05	0.0420173	2.62098e-14	ON	Solid only	Solid_ON
p@chr8:63077406..63077421,-	0.389	0	0.245	0.092	0.027	0.02	0.00179104	0.846204	3.21051e-08	ON	Solid only	Solid_ON
p@chr16:22309943..22309949,-	0.625	0.725	0.667	0.154	0.135	0.145	3.65445e-06	2.1098e-09	5.00049e-17	ON	Pan	Pan_ON
p@chr7:99277291..99277298,+	0.625	0.196	0.471	0.154	0	0.06	3.65445e-06	0.000705251	3.02059e-14	ON	Pan	Pan_ON
p@chr15:85572661..85572666,+	0.444	0.373	0.5	0.108	0.541	0.115	0.000501922	0.20366	6.32432e-11	ON	Solid only	Solid_ON
p@chr2:131680203..131680207,-	0.444	0.431	0.382	0.108	0.027	0.06	0.000501922	5.07765e-07	3.5282e-10	ON	Pan	Pan_ON
p@chr20:11876829..11876845,+	0.5	0.235	0.48	0.123	0.108	0.11	0.000189911	0.22182	2.18477e-10	ON	Solid only	Solid_ON
p@chr20:62128967..62129009,+	0.5	0.157	0.402	0.123	0	0.055	0.000189911	0.00379427	1.69051e-11	ON	Pan	Pan_ON
p@chr1:62565049..62565052,+	0.556	0.137	0.559	0.138	0.27	0.12	3.98353e-05	0.224265	2.40514e-13	ON	Solid only	Solid_ON
p@chr10:126684635..126684641,+	0.556	0.588	0.657	0.138	0.365	0.16	3.98353e-05	0.0677568	2.82669e-15	ON	Solid only	Solid_ON
p@chr15:44161010..44161015,+	0.556	0.843	0.686	0.138	0.365	0.12	3.98353e-05	2.17493e-06	2.43836e-20	ON	Solid only	Solid_ON
p@chr3:129089547..129089586,-	0.556	0.608	0.637	0.138	0.514	0.135	3.98353e-05	0.709108	3.89319e-16	ON	Solid only	Solid_ON
p@chr22:46041721..46041741,+	0.319	0.412	0.284	0.077	0	0.015	0.00952107	2.08212e-08	1.1899e-10	ON	Pan	Pan_ON
p@chr5:58377342..58377347,-	0.319	0.235	0.373	0.077	0.122	0.07	0.00952107	0.356783	6.91183e-09	ON	Solid only	Solid_ON
p@chr7:86547637..86547640,-	0.319	0.216	0.392	0.077	0.27	0.08	0.00952107	0.873105	5.32008e-09	ON	Solid only	Solid_ON
p@chrX:146959449..146959485,+	0.319	0.196	0.461	0.077	0	0.025	0.00952107	0.000705251	4.78193e-18	ON	Pan	Pan_ON
p@chr20:46285654..46285658,+	0.375	0.431	0.48	0.092	0.554	0.1	0.00296031	0.45504	3.87302e-11	ON	Solid only	Solid_ON
p@chr7:96635700..96635737,-	0.375	0.098	0.539	0.092	0	0.11	0.00296031	0.0419484	5.40631e-13	ON	Solid only	Solid_ON
p@chr19:31841716..31841755,-	0.556	0.314	0.578	0.892	0.392	0.915	0.000501922	0.776539	7.62075e-10	OFF	Solid only	Solid_OFF
p@chr19:15544099..15544156,-	0.667	0.784	0.775	0.923	0.662	0.95	0.00586133	0.37653	8.37455e-05	OFF	Solid only	Solid_OFF
p@chr4:174430774..174430814,+	0.181	0.235	0.196	0.815	0.162	0.82	1.32996e-10	0.704752	6.79704e-23	OFF	Solid only	Solid_OFF
p@chr5:151052758..151052772,-	0.694	0.294	0.549	0.938	0.189	0.925	0.0066804	0.444874	6.2129e-12	OFF	Solid only	Solid_OFF
p@chr19:41933267..41933320,-	0.389	0.51	0.588	0.877	0.689	0.925	1.03424e-06	0.185465	4.36854e-10	OFF	Solid only	Solid_OFF
p@chr10:17275758..17275914,+	0.736	0.843	0.647	0.969	0.973	0.98	0.00275041	0.0588014	3.3204e-13	OFF	Solid only	Solid_OFF
p@chr10:17277273..17277306,+	0.736	0.843	0.618	0.969	0.946	0.99	0.00275041	0.196424	2.31636e-16	OFF	Solid only	Solid_OFF
p@chr4:57899389..57899467,-	0.556	0.412	0.471	0.954	0.122	0.87	6.79726e-06	0.002087	3.84034e-11	OFF	Solid only	Solid_OFF
p@chr2:216283990..216284004,-	0.667	0	0.49	0.969	0.068	0.88	0.000265547	0.219457	4.31952e-11	OFF	Solid only	Solid_OFF
p@chr9:35791567..35791650,+	0.5	0.039	0.402	0.985	0.081	0.93	1.34011e-08	0.802539	4.70549e-20	OFF	Solid only	Solid_OFF
