# Supplementary material for: Transcriptome Analysis of Recurrently Deregulated Genes across Multiple Cancers Identifies New Pan-Cancer Biomarkers
Source: Oxford University Press journal article supplement (doi:10.1158/0008-5472.can-15-0484), 2015-11-09
Supplement: 00085472can150484-sup-145596_2_supp_3145141_njpkmp.xlsx [file 00085472can150484-sup-145596_2_supp_3145141_njpkmp.xlsx]

## Sheet: Sheet1
Supplementary table 4. Genes differentially expressed in TCGAs primary tumors
DOWN regulated				UP regulated
Gene name	log2 FC Cancer vs Normal	adj.P.Val (Benjamini Hochberg adjusted)		Gene name	log2 FC Cancer vs Normal	adj.P.Val (Benjamini Hochberg adjusted)
ADH1B	-5.52558	3.58349e-233		CA9	3.44021	2.08888e-113
PI16	-4.39738	1.31188e-235		MYBL2	3.31519	6.63063e-274
C7	-4.33905	6.49285e-167		MMP11	3.28191	5.65623e-209
CHRDL1	-4.25113	1.22301e-190		UBE2C	3.25297	0
DES	-4.22265	4.43821e-154		COL11A1	3.229	2.42176e-94
OGN	-4.12421	4.46321e-198		MELK	3.00788	4.72541e-304
DPT	-4.02254	9.71033e-227		KIF4A	2.97099	0
SFRP1	-4.01856	6.18963e-172		TROAP	2.94708	3.79542e-303
SCARA5	-4.01352	6.40589e-217		IQGAP3	2.94507	0
GPM6A	-3.90931	3.05989e-267		TOP2A	2.93978	9.31072e-291
CA4	-3.89766	5.35303e-207		BIRC5	2.91931	3.09559e-269
ABCA8	-3.75301	7.54544e-204		COL10A1	2.89799	3.45149e-107
FXYD1	-3.61122	3.77827e-233		PKMYT1	2.89732	0
SCN7A	-3.54366	1.2188e-249		KIF20A	2.88215	8.29219e-296
C2orf40	-3.48141	5.43694e-200		CST1	2.88096	3.49077e-73
MAMDC2	-3.46215	1.38785e-254		DLGAP5	2.87463	4.989e-280
DPP6	-3.46186	6.27575e-240		TPX2	2.86853	0
TCEAL2	-3.43899	2.38831e-221		KIF18B	2.85822	4.66317e-288
ANGPTL1	-3.43833	1.23355e-253		CDC45	2.85417	9.45365e-282
MYOC	-3.39934	1.56603e-270		HJURP	2.83984	4.56341e-301
ADH1C	-3.37042	1.40976e-131		UHRF1	2.82706	0
ATP1A2	-3.3127	1.62902e-171		NEK2	2.75597	3.61517e-285
MYH11	-3.29341	1.27256e-169		FOXM1	2.75371	1.27208e-294
HSPB6	-3.27145	1.02096e-198		ASPM	2.74508	1.6609e-246
AOX1	-3.20369	5.10333e-175		NXPH4	2.68927	2.23693e-130
SCNN1B	-3.18891	5.98986e-142		MKI67	2.68782	2.99373e-261
RERGL	-3.18764	1.14815e-230		BUB1	2.6825	1.44036e-269
CD300LG	-3.16677	1.54265e-205		CDKN2A	2.63509	4.37288e-103
TNXB	-3.14437	4.15799e-226		AURKB	2.61392	1.30865e-235
LYVE1	-3.14393	2.02174e-262		EPR1	2.60253	2.17157e-218
FAM107A	-3.13799	3.77827e-233		ANLN	2.60136	1.60303e-248
C4orf31	-3.13681	4.58433e-164		CCNB2	2.597	3.36041e-290
PLP1	-3.13611	3.46229e-184		KIF14	2.5965	4.25784e-244
GSTM5	-3.13107	3.14164e-221		NCAPG	2.59622	3.61517e-285
C16orf89	-3.12014	2.24125e-127		MMP1	2.59514	3.83533e-71
CLEC3B	-3.11471	3.97812e-291		TTK	2.5874	3.57176e-270
FOSB	-3.11066	2.09794e-114		CENPF	2.58192	5.12318e-270
AQP2	-3.04174	5.31368e-271		PLK1	2.57811	1.0999e-278
CRHBP	-3.02416	0		NUF2	2.5749	7.52762e-250
C1QTNF7	-3.02147	5.70579e-234		MCM10	2.57451	2.87123e-246
DNASE1L3	-3.02066	2.10286e-182		CEP55	2.57149	3.72744e-274
CCL14	-3.01357	6.63999e-173		CDC20	2.5642	2.44523e-248
PGM5	-3.00414	1.61697e-219		CENPA	2.56009	1.71507e-255
TCF21	-3.00058	1.78336e-301		BUB1B	2.5577	5.78104e-288
MFAP4	-2.99168	2.11087e-149		GTSE1	2.53559	6.07322e-282
MT1M	-2.97356	3.00815e-170		RRM2	2.53414	7.65778e-233
FMO2	-2.97079	9.33187e-152		CDC25C	2.49006	5.86119e-261
TMEM132C	-2.96687	1.36185e-184		PBK	2.46877	9.40367e-219
DCN	-2.96362	4.7322e-159		CDT1	2.46048	1.51426e-276
CNTFR	-2.95722	7.04412e-122		EXO1	2.44604	7.71292e-243
FABP4	-2.95401	4.44469e-81		KIF2C	2.44471	1.54968e-256
ITLN1	-2.95398	1.71443e-179		SKA3	2.43654	3.93169e-283
PPP1R1A	-2.94881	3.30294e-111		NCAPH	2.41113	1.99751e-257
MAPK4	-2.94772	8.20332e-129		CDC6	2.39669	1.67737e-256
LMO3	-2.9211	2.97065e-140		CDCA2	2.3814	5.44292e-218
ASPA	-2.90279	0		MMP13	2.36062	3.50878e-58
CLDN8	-2.90022	5.01392e-108		KIAA0101	2.35813	1.08066e-255
FIGF	-2.89808	1.01361e-208		CTHRC1	2.34743	1.87457e-131
XPNPEP2	-2.88363	3.68911e-145		FAM111B	2.324	1.38559e-203
SCNN1G	-2.86843	1.137e-111		POLQ	2.32381	2.80792e-232
CNTN1	-2.86718	1.04943e-120		CKAP2L	2.32018	2.56082e-224
GREM2	-2.86467	4.4462e-158		RAD54L	2.31603	4.94709e-247
PCOLCE2	-2.86244	1.29315e-120		SKA1	2.30891	9.40357e-237
UMOD	-2.86235	2.5344e-242		ESM1	2.308	1.20324e-154
ANK2	-2.85954	9.07975e-207		FAM64A	2.30303	6.92253e-216
IGSF10	-2.85196	2.12971e-178		DEPDC1	2.29463	4.92195e-194
HSPB7	-2.84995	8.21429e-139		ASF1B	2.29189	1.53552e-287
PDK4	-2.82006	9.07158e-162		PRAME	2.29052	1.87053e-38
HBA1	-2.80667	5.58463e-82		NEIL3	2.27308	2.78003e-196
CASQ2	-2.79194	5.78947e-141		CDCA5	2.26852	2.3628e-271
ADH1A	-2.76784	1.07995e-265		HMMR	2.26181	1.02024e-220
LMOD1	-2.75815	2.38329e-220		ZIC2	2.26003	3.82106e-77
KIAA0408	-2.74427	1.41447e-117		C16orf59	2.25416	2.61804e-294
PTH1R	-2.71675	2.98404e-203		E2F7	2.24038	2.5597e-196
CDO1	-2.71061	1.94778e-148		E2F1	2.23007	2.18834e-260
HMGCS2	-2.69266	2.46593e-55		SPC25	2.22875	1.52681e-248
ZBTB16	-2.69179	3.64826e-141		DTL	2.21519	1.69448e-243
ABCA9	-2.69036	2.17539e-181		E2F8	2.21417	1.61986e-181
SDPR	-2.68867	4.71299e-208		CCNA2	2.20464	5.79493e-235
FHL1	-2.66871	1.16279e-175		CDCA3	2.19903	1.37623e-238
SLC13A2	-2.66221	1.37804e-99		KIFC1	2.19301	1.53519e-236
SYNPO2	-2.65029	2.26062e-176		CDKN3	2.18434	4.38757e-216
NEGR1	-2.64778	1.19869e-161		MMP9	2.17425	1.44155e-72
PKHD1L1	-2.64709	4.0211e-128		ORC6L	2.17043	9.42061e-244
MMRN1	-2.63571	2.48401e-128		SPP1	2.16437	5.14306e-72
ABI3BP	-2.63364	7.26505e-140		CDCA8	2.15696	1.0574e-269
CCL21	-2.6323	1.66484e-66		GABRD	2.14508	6.02779e-167
MYOCD	-2.61773	7.6892e-191		CENPM	2.12197	1.00146e-221
HBB	-2.61033	2.65332e-112		CLSPN	2.11189	7.19179e-157
PTGDS	-2.60617	3.11727e-106		PTTG1	2.10983	3.91544e-206
SCN2B	-2.60346	5.90375e-178		TRIP13	2.10639	1.21675e-228
PEG3	-2.60096	1.64578e-148		C9orf140	2.08297	4.31347e-200
NRXN1	-2.59776	9.69549e-150		MND1	2.07447	4.81752e-198
ANGPTL7	-2.59473	3.32693e-206		NDC80	2.07412	8.35521e-190
GFRA1	-2.59032	2.069e-79		TUBB3	2.06895	1.17265e-109
PCDH9	-2.58893	2.32825e-169		GRIN2D	2.05594	9.81554e-121
PYGM	-2.58888	8.84341e-167		ABCA12	2.04944	1.20548e-55
PRELP	-2.58548	3.26084e-135		ERCC6L	2.03936	1.20748e-236
CNN1	-2.58541	1.66495e-147		RECQL4	2.03923	1.35359e-217
PTGIS	-2.57211	9.12984e-126		NUSAP1	2.03857	1.16542e-224
PLAC9	-2.55753	2.84311e-174		SGOL1	2.03183	2.5058e-193
RELN	-2.55309	2.63888e-95		HMGA2	2.02804	6.62025e-57
CCBE1	-2.54627	3.47172e-156		SLC7A11	2.00336	3.37104e-88
HPD	-2.54378	8.30221e-139		AURKA	1.9946	1.39743e-243
RANBP3L	-2.53937	2.86676e-158		CENPE	1.99018	1.96766e-183
CXCL12	-2.53842	2.34964e-200		KIF15	1.98778	1.93258e-169
MT1G	-2.53423	3.35021e-75		FER1L4	1.97261	7.48742e-71
BCHE	-2.52243	6.30067e-108		GPRIN1	1.96859	8.19496e-190
HLF	-2.52129	9.69087e-145		MMP12	1.96368	2.36351e-52
HIF3A	-2.51916	4.93898e-123		EME1	1.96261	2.65807e-225
MASP1	-2.51741	9.61365e-128		CELSR3	1.95403	2.11402e-126
PCK1	-2.4956	4.33971e-85		UBE2T	1.94161	1.1154e-232
PLCXD3	-2.49428	2.65264e-125		C15orf42	1.93604	4.45344e-180
AGTR1	-2.48971	1.61029e-100		ETV4	1.91884	2.08208e-85
VSIG2	-2.48649	2.30786e-71		PLEKHN1	1.91384	7.32424e-123
PKNOX2	-2.47994	5.93907e-139		OTX1	1.91291	1.32842e-122
C7orf58	-2.47953	2.83618e-202		EZH2	1.88759	1.32871e-239
MUC15	-2.47521	4.87445e-85		GINS2	1.87763	2.10896e-212
AQP4	-2.47408	2.91529e-99		CCNE1	1.87182	9.91124e-161
LRRC2	-2.47302	3.12823e-175		MMP10	1.87011	2.03423e-44
MYOM1	-2.45771	4.81289e-175		HAGHL	1.86871	1.37035e-96
SLC4A4	-2.45263	6.59663e-101		PRC1	1.86745	1.55988e-238
MAOB	-2.45244	2.46313e-106		FABP6	1.86452	3.13228e-59
OMD	-2.44946	6.06426e-106		PYCR1	1.86364	1.02041e-145
GPIHBP1	-2.44625	2.08876e-166		ADAM12	1.85701	2.72111e-76
MRGPRF	-2.44533	1.14194e-185		CENPI	1.85449	2.43188e-157
TMEM100	-2.44296	4.19147e-121		TK1	1.85383	3.9302e-177
ABCA6	-2.44015	6.58279e-145		TMEM132A	1.85166	5.87153e-164
ALDH1A2	-2.43979	2.13486e-110		CDK1	1.84732	1.96065e-189
GPR133	-2.43261	5.53431e-138		FANCA	1.84113	5.02411e-181
SOSTDC1	-2.42728	7.5678e-69		PAQR4	1.84112	4.31611e-228
PLN	-2.41705	3.23601e-133		IBSP	1.83171	7.40794e-71
SERPINA5	-2.40695	2.08375e-75		FAM72D	1.82623	1.33131e-163
COL4A6	-2.40439	2.42579e-97		MEX3A	1.82563	5.2086e-113
SGCA	-2.39517	5.00404e-140		FAM54A	1.82347	1.97986e-186
CLIC5	-2.39452	3.24447e-149		DEPDC1B	1.81853	5.01887e-111
PDZRN4	-2.3828	1.23936e-105		IGF2BP3	1.81208	5.96141e-57
VIT	-2.3762	1.81308e-137		RAD51	1.81043	4.00892e-205
CES1	-2.37333	1.31316e-61		WDR62	1.80787	2.70979e-169
CYP4B1	-2.37011	1.32538e-66		MLF1IP	1.80769	8.27622e-205
NCAM1	-2.36955	2.41813e-91		KRT6A	1.804	3.37384e-27
TSPAN8	-2.36322	2.44306e-70		OIP5	1.79679	3.36081e-185
ADAMTS8	-2.35653	4.42193e-144		ESCO2	1.79502	2.01852e-156
PRIMA1	-2.35446	2.61147e-92		KIF23	1.79303	4.57422e-168
PTGFR	-2.34718	3.85732e-114		ZIC5	1.79133	1.90103e-67
CAPN6	-2.34407	1.77758e-57		CCNB1	1.78788	6.70458e-232
SLC12A1	-2.33556	1.19911e-123		XRCC2	1.78615	2.53215e-195
ENPP6	-2.3346	4.57859e-179		ZNF695	1.76874	1.2283e-106
ADAMTSL3	-2.33317	5.8521e-132		FAM72B	1.76029	5.19632e-161
GCOM1	-2.32092	1.3968e-162		SIX1	1.75646	1.19917e-67
LOC284578	-2.31609	2.48527e-154		SPC24	1.75248	1.28068e-161
KNG1	-2.31562	1.51944e-164		TNNT1	1.74932	4.57846e-30
GPD1	-2.31347	1.63167e-76		E2F2	1.74435	5.53821e-147
ITGA8	-2.31217	9.22526e-122		CBX2	1.74327	3.53814e-101
SOX10	-2.31161	2.07569e-85		ADAMTS14	1.73698	1.06965e-84
CDH19	-2.30992	6.92797e-135		ORC1L	1.7228	1.34892e-150
BAI3	-2.302	3.50406e-202		FANCI	1.71914	4.61357e-258
CFD	-2.29923	5.46686e-136		ARHGAP11A	1.71831	2.082e-193
LDB3	-2.29869	2.04082e-152		CENPK	1.71334	4.90538e-160
ADAM33	-2.29681	2.74195e-126		NMU	1.70936	7.77228e-43
DARC	-2.28706	7.56055e-78		COMP	1.69629	3.92289e-28
PDE2A	-2.28541	4.81848e-216		KIF18A	1.68863	1.73767e-168
WSCD2	-2.28412	1.17334e-86		MMP3	1.68255	2.79114e-43
LOC572558	-2.28221	0		RAD51AP1	1.68217	2.14096e-178
SORCS1	-2.26933	2.40774e-79		BLM	1.67841	1.09462e-182
NECAB1	-2.26484	3.91059e-165		ONECUT2	1.67797	2.97781e-49
PIK3C2G	-2.25907	1.08025e-92		PITX1	1.67756	3.06947e-51
ASPG	-2.25877	5.42172e-88		TRIB3	1.67502	1.72839e-121
MT1H	-2.25584	6.91657e-81		COL1A1	1.6744	2.16098e-60
RBP4	-2.25183	4.66553e-60		SALL4	1.66534	2.33871e-84
BMP5	-2.25127	2.28353e-102		CCNE2	1.66375	3.13037e-141
AOC3	-2.24944	2.02849e-172		GINS1	1.66204	2.64834e-188
SHISA3	-2.24881	5.6985e-103		KIF11	1.66025	4.05388e-187
CRTAC1	-2.24763	3.09791e-66		CPNE7	1.65884	4.69767e-61
CYS1	-2.24582	3.17918e-105		KRT6B	1.65734	8.20543e-26
INMT	-2.23888	1.50704e-123		BRIP1	1.65035	9.81554e-121
SRPX	-2.23774	4.88701e-145		GRHL3	1.64518	6.95504e-55
NTRK2	-2.23459	1.97864e-70		STC2	1.63973	8.68847e-60
GDF10	-2.23276	1.55755e-107		ESPL1	1.6366	8.99499e-111
SFRP5	-2.2318	4.80773e-134		MAGEA6	1.62481	3.3283e-22
GPX3	-2.23122	1.42123e-141		STIL	1.6238	2.89522e-208
HPSE2	-2.23032	5.81937e-220		ASPHD1	1.62089	8.69784e-62
EDN3	-2.2291	1.05675e-78		PRR11	1.61168	3.6012e-84
F11	-2.2222	1.65017e-185		ZWINT	1.60377	2.14754e-196
PLIN4	-2.22203	2.8732e-79		PVT1	1.60236	1.29785e-144
FAM180A	-2.22161	7.35989e-158		KREMEN2	1.60052	4.50611e-63
SLC6A19	-2.21966	2.52746e-103		ACAN	1.59339	3.76828e-59
RSPO3	-2.21828	1.37454e-111		ECT2	1.59338	6.82773e-199
PCSK2	-2.21287	4.85001e-69		SYT12	1.59307	4.25025e-36
CCL23	-2.2097	1.11992e-214		HOXC13	1.57675	1.85192e-51
HPGD	-2.20778	1.27748e-71		DMBX1	1.57239	5.00767e-56
ATOH8	-2.20406	1.37844e-124		RDM1	1.56445	1.6162e-119
LIFR	-2.19705	3.3051e-173		SPAG4	1.56304	4.67215e-105
FOS	-2.19506	3.63931e-110		KRT17	1.56142	1.14189e-22
FLJ42875	-2.1919	5.5627e-174		GSG2	1.55825	1.51314e-151
ANO5	-2.18916	3.52457e-89		FAM72A	1.5579	3.51369e-130
NBLA00301	-2.18875	2.67661e-220		MAD2L1	1.55403	2.56843e-170
AQP7	-2.1857	1.81227e-98		C16orf75	1.55251	5.12029e-157
RNF150	-2.17964	1.5296e-129		TACC3	1.54894	1.13551e-179
PIGR	-2.17934	7.09612e-34		MAGEA3	1.53948	3.917e-22
CWH43	-2.17912	1.32421e-60		TYMS	1.53291	2.65211e-140
NOS1	-2.17467	3.17784e-120		TRPM2	1.53251	1.66941e-94
HBA2	-2.17173	7.19722e-91		KIAA1199	1.52842	3.86515e-46
SEMA3D	-2.1675	1.14922e-75		IGFL2	1.52287	1.39553e-42
PID1	-2.16656	7.64495e-167		SHCBP1	1.51673	2.24452e-118
NPY1R	-2.16366	4.57558e-68		CAMK2N2	1.51335	3.66173e-78
C13orf36	-2.16254	2.86646e-150		TFR2	1.51331	2.77779e-64
PDGFRA	-2.1614	4.0089e-107		C17orf53	1.51258	2.93284e-177
TGFBR3	-2.15712	1.69336e-167		MCM2	1.5121	5.26341e-195
GHR	-2.14749	2.27453e-132		POLE2	1.51098	3.53097e-145
WISP2	-2.14645	1.6745e-73		PRR7	1.50764	1.2187e-107
PTGER3	-2.14487	9.74309e-91		DLX5	1.50278	6.09712e-61
RIC3	-2.1394	2.32673e-103		SEZ6L2	1.50193	1.21944e-49
NR4A3	-2.1348	1.41351e-95		ULBP2	1.49075	1.19876e-73
IL1RL1	-2.12563	3.22306e-75		C9orf100	1.49053	2.00167e-165
NTRK3	-2.12524	8.5723e-100		SOX11	1.48891	9.24751e-37
FMN2	-2.12115	6.58865e-123		DIAPH3	1.4885	1.35084e-107
JPH4	-2.12073	1.00397e-217		LOC84740	1.48655	2.16882e-26
IRX1	-2.11423	4.62533e-92		APOC1	1.4783	2.04114e-50
CADM3	-2.11142	6.84773e-63		CXCL11	1.47436	1.92656e-34
ADIPOQ	-2.11055	1.0623e-57		CCNF	1.46912	1.00421e-208
SCUBE1	-2.10746	1.40614e-91		SDS	1.46434	1.86148e-55
NTNG1	-2.10623	2.8497e-86		CILP2	1.46104	9.84439e-55
BHMT2	-2.10234	1.12301e-93		SLC2A1	1.44746	1.28001e-101
CORO2B	-2.09875	8.36016e-145		GINS4	1.44619	9.06515e-138
EMCN	-2.09797	2.86934e-192		DLX6	1.44227	3.7389e-53
RSPO1	-2.09079	1.03661e-121		CHTF18	1.44218	4.60861e-145
TEK	-2.09069	1.71025e-196		EFNA3	1.44205	8.38088e-103
SYNM	-2.08829	1.6931e-131		HIST3H2A	1.44063	3.30703e-55
FAM151A	-2.08761	1.29885e-112		CDCA7	1.43658	7.38308e-60
APOD	-2.08517	8.06782e-66		PIF1	1.43572	4.5856e-98
EYA4	-2.07826	2.88577e-86		TNFRSF18	1.43408	1.71051e-55
CLCNKB	-2.07591	2.50393e-113		TNNI3	1.42891	1.69316e-42
KCNK3	-2.0755	6.03178e-79		CST2	1.42343	1.35296e-38
GSTA1	-2.06823	9.80199e-37		MNX1	1.42146	1.68874e-56
NR3C2	-2.06274	9.87159e-155		FAP	1.42088	4.473e-48
ARC	-2.06188	1.10635e-88		NFKBIL2	1.41916	6.72624e-145
ITM2A	-2.06058	5.54312e-156		HELLS	1.41671	3.20408e-126
AVPR2	-2.0555	7.77323e-160		C1orf135	1.41654	5.77533e-152
CLDN11	-2.05211	3.07418e-104		CKS2	1.41651	3.07585e-141
CHST9	-2.04994	1.75868e-56		KRT16	1.41411	1.12408e-20
C6orf176	-2.04829	5.17862e-85		F12	1.4074	1.70368e-62
MYLK	-2.04508	1.38681e-190		COL7A1	1.39685	9.46547e-33
SGCG	-2.0443	2.15172e-124		CDC25A	1.39226	8.63381e-113
HHIP	-2.04391	5.24613e-95		B4GALNT4	1.38933	2.0534e-34
ITIH5	-2.04347	3.69262e-111		UBE2S	1.38527	1.22355e-136
DLG2	-2.03374	4.10434e-132		PLK4	1.38311	4.30383e-161
SLC22A3	-2.03156	7.55895e-83		KNTC1	1.38184	1.78196e-181
SELP	-2.03115	1.64498e-88		TREM2	1.37907	1.36231e-61
STAB2	-2.02909	7.16842e-135		KISS1R	1.37604	2.76945e-48
FAM5C	-2.0247	2.31536e-73		ADM2	1.37362	7.53051e-66
FREM1	-2.02345	1.72258e-79		LMNB1	1.37256	3.69861e-136
ERBB4	-2.01703	9.33796e-66		CXCL10	1.36375	1.44223e-30
TSPAN2	-2.01667	6.84923e-142		NFE2L3	1.36324	6.08032e-77
FHL5	-2.01665	1.47914e-141		FAM83A	1.36135	4.04157e-26
ADCY5	-2.01637	1.69784e-69		GSDMC	1.3542	1.36042e-41
SVEP1	-2.00828	8.63327e-103		C5orf46	1.35003	9.92251e-38
FABP1	-2.0072	2.92669e-115		RNFT2	1.34672	3.54204e-89
SLITRK3	-2.00344	8.18545e-150		KRT80	1.34462	2.89078e-41
PPARGC1A	-2.00246	9.10088e-79		CASC5	1.34216	1.55674e-72
FAM46B	-2.00159	3.13461e-108		CCDC78	1.34131	1.90259e-42
ARHGAP20	-1.99901	6.65922e-150		ATAD2	1.34059	2.37209e-147
MAL	-1.99433	1.69807e-69		TRAIP	1.3403	1.73756e-183
MUSTN1	-1.99157	1.34537e-120		GPC2	1.33975	2.05468e-63
SEMA3E	-1.98819	9.03058e-60		C4orf48	1.33902	1.61737e-55
FGL2	-1.98441	1.24979e-141		C1QTNF6	1.33596	4.03745e-106
EFEMP1	-1.98439	7.38614e-96		IGF2BP1	1.33294	3.8187e-24
GBA3	-1.98121	4.05945e-100		C2CD4A	1.33256	3.58037e-25
JAM2	-1.98117	3.61296e-189		TERT	1.33181	6.47804e-65
PHYHD1	-1.98089	4.40323e-74		PABPC1L	1.32298	2.08614e-60
FLNC	-1.97692	2.37263e-76		ATG9B	1.32297	1.56275e-54
SLC14A1	-1.97605	8.6458e-76		HMGB3	1.3209	7.80401e-114
FBLN5	-1.97518	1.28015e-151		NETO2	1.32072	6.57351e-67
ACTG2	-1.97504	1.35044e-63		SCD	1.32071	1.53751e-59
TCEAL7	-1.97365	2.42677e-174		RACGAP1	1.31476	2.89973e-167
LRRN4CL	-1.97353	1.39277e-105		DNMT3B	1.31046	1.02313e-94
KCNJ1	-1.97346	6.83711e-123		DDX12	1.30746	3.15518e-111
KCNJ16	-1.97271	1.16078e-76		GPR19	1.30534	1.87061e-91
EGR1	-1.97004	6.88107e-106		FANCD2	1.3053	5.96307e-157
FOXP2	-1.96858	2.08393e-79		C17orf96	1.30467	2.05957e-81
NPR1	-1.96539	5.98317e-154		ARHGAP11B	1.30293	1.13717e-97
ATP1B2	-1.96445	6.26448e-151		C12orf48	1.29996	4.04858e-139
KY	-1.96117	7.88083e-98		STRA6	1.29957	3.9551e-30
KCNB1	-1.96012	3.45512e-133		DNA2	1.29924	2.55201e-123
HMGCLL1	-1.96008	7.77858e-124		MDK	1.29918	8.6562e-59
CILP	-1.94941	2.42914e-57		KIAA1524	1.29918	1.07954e-112
SSTR1	-1.94904	1.44684e-98		CABYR	1.29757	1.50596e-53
TSPAN7	-1.94752	4.01237e-99		LOXL2	1.2974	1.59614e-76
RGN	-1.9385	3.06557e-106		C7orf68	1.28743	6.44646e-90
F10	-1.93734	1.17789e-104		C11orf82	1.26536	1.10309e-106
C5orf4	-1.93667	6.0321e-136		TM4SF19	1.26218	3.52312e-37
TNS1	-1.93659	5.0366e-212		PAFAH1B3	1.2611	9.40715e-148
WIF1	-1.93554	2.11771e-44		BRCA2	1.25915	2.87021e-89
BMP3	-1.93463	2.71625e-65		TDO2	1.25107	5.79416e-33
LIMS2	-1.93404	5.81044e-198		RCC1	1.25092	5.6382e-132
GIPC2	-1.9326	6.94937e-109		SEPT3	1.24957	2.22553e-39
GPC5	-1.93211	1.10184e-139		GOLGA7B	1.24868	1.05751e-38
SEMA6D	-1.93144	1.31402e-103		MTHFD1L	1.24812	1.47365e-133
PTPRQ	-1.93079	6.88019e-96		KPNA2	1.24689	3.91227e-150
PGR	-1.92802	1.63964e-56		CARD14	1.24149	4.19785e-57
C14orf180	-1.92607	2.92591e-110		IL4I1	1.23955	1.1842e-52
SYN2	-1.92506	1.7413e-91		ALG1L	1.23834	8.98839e-41
SH3GL2	-1.92469	5.37756e-78		SPAG5	1.23799	6.26606e-80
CLDN19	-1.92455	2.24377e-91		HIST1H3D	1.2373	2.46547e-53
CASR	-1.92349	2.63112e-123		SFN	1.23426	1.49566e-29
MT1E	-1.92127	8.6876e-75		APOBEC3B	1.23404	8.98406e-46
FCER1A	-1.92007	4.62121e-76		FAM83D	1.23181	4.1607e-64
HAND2	-1.91931	1.38456e-115		CENPH	1.23069	3.91115e-160
GPM6B	-1.9181	2.58533e-148		FAM83H	1.22845	8.93198e-120
FAM189A2	-1.91666	1.09917e-93		C19orf48	1.22439	8.19484e-157
PRDM16	-1.91299	3.96318e-102		CHAF1B	1.22392	5.68044e-127
KL	-1.91109	1.40308e-116		NME1	1.2238	1.36173e-157
GAS1	-1.9099	5.86909e-105		NDUFA4L2	1.22377	2.18148e-41
GABRB3	-1.9091	1.6802e-43		TNFAIP6	1.21949	8.3178e-41
GFRA2	-1.90654	2.03984e-121		HOXC11	1.21912	7.79421e-27
SYNE1	-1.90406	1.16755e-179		POC1A	1.21564	1.2486e-156
TRPM6	-1.90207	1.89256e-105		RAD54B	1.21418	1.69704e-115
CTSG	-1.89969	3.91684e-75		DSCC1	1.20964	1.19021e-113
CA3	-1.89097	4.05621e-72		ITPKA	1.20915	1.93264e-38
NFASC	-1.89043	4.02657e-104		TP73	1.20735	1.33712e-47
ABCG2	-1.88836	3.03541e-124		HIST1H2AM	1.20676	2.12215e-83
CAMK2A	-1.88788	4.88485e-144		SLC17A9	1.20465	6.13492e-45
GABRA2	-1.88773	2.05645e-128		KRT75	1.20434	9.82259e-28
BEX1	-1.88675	3.36558e-46		PPP1R14B	1.2033	8.07789e-146
VIPR2	-1.88352	6.75834e-80		TTYH3	1.20322	7.06475e-132
B3GALT2	-1.87986	8.74394e-132		CGREF1	1.20291	3.55357e-36
TRHDE	-1.87984	3.63668e-72		MYEOV	1.20283	3.55573e-20
SLC5A7	-1.87626	3.01422e-100		HMGA1	1.20271	1.31265e-100
SLIT3	-1.87444	1.97819e-107		RNASEH2A	1.19998	5.66009e-184
TMEM213	-1.8733	1.03042e-59		HES6	1.19935	2.5899e-55
ABCB1	-1.87299	2.64335e-99		SH2D5	1.19923	8.12867e-48
SCRG1	-1.87256	1.99862e-86		WDHD1	1.19847	3.99423e-132
TMEM35	-1.86824	2.12545e-99		TRIM59	1.19793	2.37968e-136
ADRA1A	-1.8678	1.64655e-189		GYLTL1B	1.19111	8.3148e-42
ALDOB	-1.8605	1.10209e-63		MAGEA4	1.18918	3.59684e-16
IL33	-1.85773	4.42107e-76		RHPN1	1.18577	4.86119e-66
TACR1	-1.85708	2.5903e-89		HTR1D	1.18499	1.95943e-40
FAM150B	-1.85542	1.31141e-78		CHRNA5	1.18361	1.57219e-53
DUSP26	-1.85541	3.17682e-111		CD70	1.18155	5.49207e-32
WBSCR17	-1.85458	2.22287e-67		KIFC2	1.18144	1.00988e-76
NR4A1	-1.85143	2.67579e-85		DLX4	1.18077	5.32094e-52
LONRF2	-1.84978	3.42135e-60		TMEM145	1.1807	1.14157e-38
KIAA2022	-1.84754	1.0082e-80		LEMD1	1.18008	4.99431e-33
SORBS1	-1.84603	2.08829e-147		FBXO41	1.1788	2.04435e-68
USP2	-1.84497	3.81054e-108		LOC286467	1.17607	1.07771e-49
GPC3	-1.84212	6.11831e-56		CCNO	1.17547	8.97102e-32
BMPER	-1.84172	2.15331e-89		NPTX2	1.17474	5.61252e-25
SYT15	-1.83892	4.64761e-142		BOP1	1.17365	2.50972e-70
LOC134466	-1.83805	1.83913e-129		FEN1	1.16838	3.18737e-180
PLIN1	-1.83754	3.97143e-63		S100P	1.16646	1.80562e-16
CHL1	-1.8371	5.22743e-48		DHRS2	1.16039	2.74975e-13
HSD17B13	-1.83605	7.76442e-86		ECE2	1.16037	3.45563e-114
CSDC2	-1.8352	3.05847e-67		DMRTA2	1.15928	1.07804e-32
AFF3	-1.83249	5.48797e-65		CENPW	1.15798	7.34486e-83
ASAM	-1.83237	1.00438e-80		IL1F5	1.15687	1.10828e-29
GPRASP1	-1.83199	2.32813e-184		BARX1	1.15657	2.32223e-21
MATN2	-1.83141	5.86509e-100		KRT6C	1.156	6.47184e-19
PRKAR2B	-1.82661	6.40295e-128		ARNTL2	1.15569	1.13135e-43
PLG	-1.82621	1.65489e-83		C1orf170	1.15509	8.51993e-47
C21orf34	-1.82416	1.29685e-141		CLEC5A	1.15395	2.38624e-42
C18orf34	-1.82401	4.73008e-151		EN1	1.14983	2.17679e-28
SEMA3G	-1.82384	1.2714e-136		PLA2G7	1.1492	1.57835e-39
SLC4A1	-1.82368	1.68969e-122		MTBP	1.14468	1.64918e-113
MST1P9	-1.82191	4.55532e-75		DBF4	1.14464	2.38855e-166
SRL	-1.8199	1.92669e-111		NKAIN1	1.14434	4.81835e-26
ST6GALNAC3	-1.81933	6.60849e-178		DBNDD1	1.1419	8.83605e-69
TFAP2B	-1.81858	3.32106e-44		SERPINB5	1.13695	1.3201e-17
DUSP1	-1.81637	1.54066e-124		LOC541471	1.13617	6.70716e-107
CGNL1	-1.81234	8.13885e-118		KLHDC7B	1.13482	3.78915e-25
PAPPA2	-1.80794	7.24899e-82		DGCR5	1.13407	6.47027e-32
LEPR	-1.8077	6.17038e-156		SPRR1B	1.13401	3.23003e-19
SLC16A12	-1.80744	6.04725e-74		AMH	1.12843	2.5128e-38
CYR61	-1.80674	6.29116e-116		KIF26B	1.12754	1.83855e-43
PLCL1	-1.80601	1.68442e-136		MAGEA9B	1.12601	2.28558e-19
COL14A1	-1.80471	2.96518e-78		BIRC7	1.12545	1.26278e-27
KCNE1	-1.80098	4.89579e-101		RFC4	1.12475	4.84631e-151
AQP1	-1.79952	4.54549e-114		MCM4	1.12348	5.62733e-104
PMP2	-1.79908	1.20472e-204		PPEF1	1.12315	8.46404e-51
LAMA2	-1.79644	9.21731e-79		ARTN	1.1189	1.18933e-42
PDZD4	-1.79478	3.73643e-102		EPYC	1.11634	4.2692e-25
CLDN5	-1.7928	2.85402e-114		GRM4	1.11628	7.49413e-24
TMEM220	-1.79049	7.66938e-185		TBX15	1.11456	8.73169e-33
CD36	-1.78776	1.7214e-63		CHIT1	1.11441	1.17091e-12
GATA5	-1.78718	3.4447e-65		RCOR2	1.11265	4.1675e-34
L1CAM	-1.78646	1.12403e-42		SHOX2	1.11265	4.6588e-46
PTN	-1.78501	3.48523e-57		REG1A	1.11144	3.02235e-18
CLEC4M	-1.78337	5.55782e-279		LRP8	1.11124	8.63551e-57
MAP6	-1.77416	3.23312e-118		MFSD2B	1.10982	3.6012e-84
FAM184A	-1.77361	2.24992e-104		CCL18	1.10977	5.90809e-16
PDE1A	-1.77311	2.57782e-110		DLX1	1.10902	1.75035e-31
PRUNE2	-1.77038	2.3288e-75		B3GNT4	1.10744	1.30895e-45
ADHFE1	-1.76919	8.74995e-123		SMC1B	1.10685	3.6354e-29
HEPACAM2	-1.76904	1.37785e-48		HIST1H2AE	1.10653	4.42781e-34
PTCHD1	-1.76856	3.09784e-71		CCDC150	1.10633	1.96718e-53
AKAP12	-1.76673	9.7948e-98		ATAD5	1.1056	1.12525e-91
FXYD6	-1.76472	3.62646e-130		ADAMDEC1	1.10443	5.10078e-19
MFSD4	-1.76426	5.69923e-84		RHBDF2	1.103	3.5739e-145
C6	-1.76348	7.19467e-49		SPOCD1	1.10201	1.5325e-32
MSRB3	-1.76279	4.73256e-140		LOC647946	1.10098	3.1204e-47
ACACB	-1.76224	3.03893e-150		HOXB13	1.10059	7.80487e-15
FGF2	-1.76057	3.16351e-99		HIST1H2BH	1.09766	5.95628e-54
DAO	-1.76054	1.37938e-139		CDC7	1.09762	8.45732e-92
COX7A1	-1.76015	1.68259e-99		FANCB	1.09593	4.41159e-107
CMTM5	-1.75984	5.3241e-234		SLC7A5	1.09301	5.14397e-37
EGR3	-1.75769	3.2735e-70		GPR172A	1.09212	2.7294e-148
DDR2	-1.75512	9.92703e-86		CHEK1	1.09044	3.9596e-117
DMGDH	-1.75042	8.77865e-101		PRSS1	1.0889	4.85568e-22
ASXL3	-1.74953	5.8558e-92		HIST2H2AA3	1.08874	1.47432e-47
NAP1L2	-1.74864	4.79139e-88		TNFRSF4	1.08638	2.55466e-55
RGS2	-1.74494	3.26297e-109		RHEBL1	1.08592	2.18346e-83
PROM1	-1.74463	1.85074e-25		PLAC1	1.0856	2.34723e-40
GNG7	-1.74308	6.67398e-154		CKAP2	1.08543	1.90964e-137
NPHS2	-1.74229	5.80065e-154		PRR19	1.08516	9.67504e-112
FGF7	-1.74099	2.01348e-96		TMEM184A	1.08467	9.87368e-43
DNER	-1.74047	6.856e-47		RPL36A	1.08298	6.55679e-68
PDE8B	-1.73991	4.63402e-94		BBC3	1.08266	9.3965e-91
SOD3	-1.73949	1.26964e-93		CXCL9	1.08192	1.37461e-16
ACSM5	-1.73813	1.38069e-100		MAGEA2	1.07979	1.95542e-15
IGJ	-1.73521	1.17603e-28		MAST1	1.07906	1.81066e-37
PLSCR4	-1.73485	1.55028e-189		H2AFX	1.0761	3.86037e-112
GSTA2	-1.73421	4.2655e-47		SRCIN1	1.07559	8.66925e-38
SLC9A3	-1.73191	1.23125e-63		MIF	1.07215	8.72978e-81
SFTPC	-1.73155	3.41461e-42		ISG15	1.07057	8.13918e-36
LOC100302650	-1.72725	3.72014e-103		TNFRSF6B	1.06992	1.16208e-35
PGM5P2	-1.72692	1.9752e-278		TLCD1	1.06966	3.97922e-76
MYL9	-1.72621	6.3841e-142		MC1R	1.06733	3.83531e-70
LTBP4	-1.72602	2.46219e-152		LOC399815	1.0653	5.28292e-71
SLC12A3	-1.7231	1.76489e-96		COL5A2	1.06385	1.29016e-40
CCDC69	-1.7224	7.38705e-154		FOXP3	1.06304	5.45887e-38
NCRNA00092	-1.72064	6.45303e-120		CDK5R1	1.06189	6.87848e-77
GRIA1	-1.71853	6.0973e-80		DDX11	1.06005	1.31684e-80
GRIK5	-1.71722	5.1439e-74		NUDT1	1.05926	1.74786e-127
PPP1R12B	-1.71665	7.86002e-191		GPR115	1.05906	1.06008e-23
FGF9	-1.7145	1.17029e-73		GPR84	1.05875	1.41509e-46
CPAMD8	-1.71441	3.52256e-68		DLL3	1.05721	6.21415e-29
SYT9	-1.71346	5.66807e-50		CLDN1	1.05553	1.36265e-24
SEPP1	-1.71134	8.12933e-119		TIMELESS	1.05453	4.38605e-153
GALNTL2	-1.71029	1.3022e-80		HAPLN1	1.0511	9.17931e-21
MT1A	-1.70996	4.75025e-60		LBX2	1.04952	3.7726e-70
RALYL	-1.70903	1.17509e-174		GJB2	1.04774	1.81381e-22
RUNX1T1	-1.70737	5.52143e-106		ULBP1	1.04714	1.6969e-34
TYRP1	-1.70643	3.79407e-71		DSG3	1.04693	1.19963e-13
COL4A3	-1.70543	4.12493e-70		TGFBI	1.04416	4.79309e-35
LRRK2	-1.7041	2.70678e-69		SYNGR3	1.04366	1.37007e-32
FRMD3	-1.70368	2.5428e-91		EPHX4	1.04264	1.1284e-33
NKAPL	-1.70366	3.19847e-199		MTL5	1.04217	1.70486e-49
TAGLN	-1.70178	4.08721e-103		INHBA	1.04101	1.73296e-27
ACADL	-1.70163	1.1558e-65		MAGEA12	1.04074	4.66606e-16
PEBP4	-1.69893	6.08054e-53		SHMT2	1.03876	3.2774e-153
SLC19A3	-1.69683	6.77417e-59		NOX4	1.038	9.51138e-37
HRNBP3	-1.6964	3.25915e-147		SLC16A3	1.03706	5.78704e-55
CRYAB	-1.69571	8.57567e-64		MARCKSL1	1.03624	2.23325e-98
CLCA4	-1.69558	1.91018e-46		CHAF1A	1.03608	2.93079e-145
TNNC1	-1.69543	1.40391e-52		NCAPG2	1.03507	4.45823e-117
PHYHIP	-1.69521	1.14973e-93		KRT15	1.03327	7.04628e-14
KIT	-1.69428	1.21622e-60		CIT	1.031	8.63266e-55
PPP1R14A	-1.69416	1.8865e-107		PDX1	1.03078	1.12187e-39
PCDH20	-1.6935	1.7822e-49		APLN	1.03014	1.37891e-38
GNA14	-1.69328	1.8967e-102		PLEK2	1.02848	4.78074e-49
C8orf84	-1.69268	4.20313e-63		LRRC8E	1.02712	1.68988e-74
NPY5R	-1.69158	3.9018e-89		HIST1H2BJ	1.02562	1.54383e-42
ZDHHC15	-1.68855	5.16341e-107		DNAH14	1.02524	3.83971e-65
ZFPM2	-1.68345	3.93384e-106		CDCA4	1.02418	7.82406e-138
RGS7BP	-1.68226	5.54997e-99		CENPN	1.02318	1.44004e-114
MYOM2	-1.68029	1.7069e-92		GJB4	1.02235	4.64808e-24
DENND2A	-1.67978	4.9719e-136		ASNS	1.02194	4.87706e-73
PDLIM3	-1.6791	1.61627e-83		KLC3	1.02151	2.87897e-34
LRP1B	-1.67907	2.53867e-43		FAM40B	1.01842	1.12877e-34
SELE	-1.67874	9.30578e-48		SGOL2	1.0181	6.17807e-105
RGS9	-1.67497	1.15215e-79		OR51E1	1.01662	2.28844e-43
FXYD4	-1.67443	1.1953e-87		LMNB2	1.01659	1.62884e-141
ACOX2	-1.67393	9.99259e-81		KIF4B	1.01622	1.01381e-111
SORBS2	-1.67374	2.025e-84		KCNK9	1.01534	6.02493e-35
SLC2A4	-1.67081	1.43968e-85		FBXO43	1.0136	1.58781e-66
EDNRB	-1.67067	2.8361e-106		PADI3	1.01334	2.32367e-14
VGLL3	-1.66954	3.35507e-74		SLCO1B3	1.01294	4.12899e-17
PENK	-1.66799	1.31662e-53		UBD	1.01235	1.23001e-14
C1orf95	-1.6654	2.28991e-55		SOX4	1.01088	1.23914e-78
ATP13A4	-1.66537	8.19812e-43		DPF1	1.01076	8.34306e-49
SELENBP1	-1.66385	9.76369e-111		LCN2	1.00918	5.73497e-11
HRASLS5	-1.66367	1.72792e-55		C1orf112	1.00735	1.28253e-131
HRG	-1.66047	2.55621e-131		ZP3	1.00547	2.18499e-59
HSD17B6	-1.66026	6.63516e-82		DUSP5P	1.00538	4.95021e-39
BMX	-1.65967	2.66499e-81		RELT	1.00501	2.89619e-90
GP2	-1.65912	6.44863e-36		AIM1L	1.00375	1.06761e-28
RPRM	-1.65812	1.70644e-77		DLX6AS	1.00341	2.22728e-43
SLIT2	-1.65777	2.14923e-58		COL22A1	1.00276	3.21945e-16
WDR17	-1.65472	5.11619e-74		CDH3	1.00185	4.44125e-21
MT1X	-1.65415	3.13303e-81		CDSN	1.0007	5.94977e-17
MYL3	-1.65305	6.32577e-79		MTHFD2	1.00039	9.85933e-78
NAALAD2	-1.6529	2.25345e-147		KCNJ5	-1.00026	1.56531e-31
OSR1	-1.65193	1.07503e-65
PON3	-1.65022	4.00058e-44
GNAO1	-1.65017	2.22359e-75
KCNMB2	-1.64982	7.29838e-97
MEOX2	-1.6488	3.6761e-70
USP44	-1.64875	7.40514e-122
C14orf132	-1.64648	2.52147e-82
TSLP	-1.64536	1.72779e-90
C1orf114	-1.64497	1.02774e-93
OLFM1	-1.64227	1.02407e-54
MMP28	-1.64155	2.02225e-70
KLHL4	-1.6406	2.21666e-80
GALNTL1	-1.64039	2.67931e-66
CACNA2D1	-1.64	3.67185e-52
ABCC9	-1.6377	1.929e-101
DMD	-1.63632	7.72408e-86
CYP4A11	-1.63627	4.79093e-64
PODN	-1.63507	1.74983e-62
CHRNA4	-1.63494	1.94482e-80
KLF2	-1.63344	4.26259e-137
IP6K3	-1.63222	1.55549e-45
MEIS2	-1.63084	9.18896e-123
KLF15	-1.62933	2.21039e-75
CNTN3	-1.62681	2.11446e-54
PLA2G2A	-1.62681	1.51997e-25
PDE7B	-1.62674	4.10303e-123
MFAP5	-1.62536	2.15858e-38
KLF4	-1.62489	8.81905e-113
CYP4F12	-1.62226	1.28537e-52
DACT2	-1.62106	1.05929e-39
ATF3	-1.61867	2.234e-69
PRKG1	-1.61669	1.10117e-82
CNTN4	-1.61639	4.65193e-73
ALB	-1.61601	3.52241e-35
psiTPTE22	-1.61548	3.68407e-51
ID4	-1.61543	2.0045e-77
KCND3	-1.61438	5.99801e-64
MT1F	-1.61411	6.22665e-75
CA1	-1.61349	3.27234e-104
CYBRD1	-1.61251	3.46171e-123
C2orf88	-1.61172	3.13703e-104
LRRN3	-1.61165	1.04526e-86
GLYAT	-1.61127	3.83921e-74
SLC5A8	-1.6097	3.81192e-27
PCP4	-1.6082	1.99817e-38
METTL7A	-1.60501	1.76704e-145
LOC145820	-1.60483	8.8005e-129
FAM198A	-1.604	1.31711e-80
MGP	-1.60351	2.22884e-67
EPHA7	-1.60286	7.6367e-42
EGR2	-1.60264	1.85388e-73
RSPO2	-1.60217	1.79459e-112
LEFTY2	-1.60107	1.98077e-72
PDZRN3	-1.60004	1.46343e-91
NRK	-1.59957	6.11423e-43
SOCS2	-1.59946	4.99333e-109
MAPK10	-1.59847	1.76986e-82
IQSEC3	-1.59802	3.11943e-68
TNNT3	-1.59679	8.04713e-45
PRSS35	-1.59643	2.99766e-100
KIF26A	-1.59344	2.93064e-84
AQP7P1	-1.59211	4.50583e-101
ANGPT1	-1.59196	6.41402e-87
OVCH2	-1.59182	2.22959e-186
NDRG2	-1.5908	3.45323e-131
LOC339524	-1.5904	9.24709e-115
AGPAT9	-1.59033	2.3771e-85
NEXN	-1.58988	8.44026e-101
CHRM2	-1.58967	1.26048e-227
PDE1C	-1.58789	9.0304e-78
KCNMB1	-1.58725	3.34387e-93
IGF1	-1.5866	1.42364e-56
ZFP36	-1.58615	1.54429e-103
PAMR1	-1.58508	2.63683e-87
LOC401093	-1.58492	4.56027e-154
DAAM2	-1.58399	1.16796e-102
ECM2	-1.58116	5.08319e-102
NUDT10	-1.58096	8.28286e-81
LOC728264	-1.57998	1.23887e-76
RASGRP2	-1.57861	1.51251e-91
KCNA5	-1.57854	1.11341e-104
TMEM178	-1.5781	8.1223e-78
CLCNKA	-1.57715	3.81781e-64
MORN5	-1.57606	6.42105e-92
SLC22A8	-1.57519	1.374e-101
GSTM3	-1.57482	8.38865e-59
MYOZ1	-1.57305	5.33899e-66
C10orf116	-1.57169	2.01196e-55
ADAMTS1	-1.57115	1.88315e-98
ALDH1A1	-1.57007	1.06742e-54
ABCA10	-1.56963	1.27852e-81
CCDC85A	-1.56811	9.43985e-98
MME	-1.56709	6.46802e-40
SLC24A3	-1.56672	6.28724e-68
RASD1	-1.56444	1.59356e-56
PPP2R2B	-1.56183	8.03866e-71
CPEB1	-1.56167	1.19454e-75
SCN3A	-1.56161	1.18052e-66
JPH2	-1.55831	8.59265e-63
LGI3	-1.55687	1.84613e-52
FAT4	-1.5567	3.01979e-95
AMPH	-1.55536	6.7519e-68
LPHN3	-1.55508	4.15581e-55
DIO1	-1.55288	2.3429e-31
FGF10	-1.55185	3.30187e-100
DLGAP2	-1.55092	4.3285e-128
HSPB8	-1.55077	5.97977e-59
KCNA1	-1.54915	6.73149e-97
PTX3	-1.54817	1.61111e-54
RGS22	-1.54779	3.40706e-54
ASB5	-1.54664	2.35847e-76
AG2	-1.54592	8.75308e-84
LOC284276	-1.5448	9.12469e-78
CACNA1H	-1.54478	1.25741e-58
TMOD1	-1.54474	3.77045e-107
C7orf41	-1.54416	3.93778e-167
SYPL2	-1.54381	7.13288e-93
APOH	-1.54364	2.17127e-62
EFHA2	-1.54336	2.72318e-123
NAP1L3	-1.54323	5.97119e-107
NTN4	-1.54229	2.35633e-84
SLC26A7	-1.54155	2.42738e-59
TNNI3K	-1.54063	9.43516e-103
ALDH1L1	-1.54003	9.57491e-31
KCNIP1	-1.53998	3.04458e-102
RERG	-1.53994	3.79409e-76
CMA1	-1.53954	3.80134e-107
SCN4B	-1.53902	3.79769e-80
REEP1	-1.5383	4.02333e-58
VAT1L	-1.53789	9.96253e-60
NDN	-1.5374	3.63746e-102
SPON1	-1.53737	4.55555e-41
PARM1	-1.53721	3.12988e-86
CADM2	-1.53639	1.88111e-76
CPNE6	-1.53571	8.87233e-129
SCN11A	-1.53509	4.02337e-139
SOBP	-1.53477	9.6371e-102
AR	-1.53399	1.84624e-44
STAC	-1.53339	1.97362e-49
FBLN1	-1.53216	4.13384e-71
LGI4	-1.53187	8.40787e-83
GPER	-1.53086	3.01759e-82
SLITRK2	-1.53064	1.71655e-63
CLEC10A	-1.5306	1.56615e-50
KLF9	-1.53047	9.92344e-177
RNF180	-1.52892	1.14545e-116
ANKRD35	-1.52875	9.81435e-78
IGF2	-1.52729	1.82499e-30
TUSC5	-1.52721	1.36205e-50
SLC1A1	-1.52546	6.86148e-52
ELF5	-1.52469	1.61472e-29
FAM180B	-1.52453	1.46008e-152
C20orf200	-1.52128	1.30612e-198
UNC5C	-1.51796	9.5813e-78
PARK2	-1.51756	3.93021e-111
HAO2	-1.51734	3.78899e-74
RBM24	-1.51579	2.10619e-44
SLC36A2	-1.51461	1.15791e-107
C1orf168	-1.51455	3.66683e-49
C8orf80	-1.51368	1.68767e-57
TREH	-1.51331	6.83686e-79
VIPR1	-1.51227	2.70025e-73
PCDHGB7	-1.51204	1.11686e-65
ARHGAP6	-1.51033	5.53327e-118
IL6	-1.50998	3.51762e-34
FGFR2	-1.50974	6.84443e-63
KLHL14	-1.5057	7.83261e-76
AKAP2	-1.50541	3.75309e-80
HSD11B1	-1.50469	1.56925e-53
GPR182	-1.50448	3.30899e-220
AIF1L	-1.50404	1.3503e-72
TMIGD1	-1.50402	5.46826e-203
CKMT2	-1.50269	1.71112e-39
MYCT1	-1.50204	1.04245e-147
MRC1	-1.50134	4.58355e-54
NMUR1	-1.50111	1.63629e-113
PRICKLE2	-1.5001	1.40024e-137
SLC25A34	-1.49984	4.21511e-110
NXPH3	-1.4997	3.64338e-80
RBMS3	-1.49927	5.94768e-111
GATM	-1.49849	7.27747e-62
DACT3	-1.49646	3.16202e-100
SOX5	-1.49609	6.52703e-82
GGT6	-1.49552	1.24699e-33
LDB2	-1.4947	1.38193e-149
MRO	-1.49237	7.00437e-73
PLA2R1	-1.49177	6.99633e-89
ATP12A	-1.49115	2.50785e-40
PPP1R16B	-1.49038	1.81725e-83
BVES	-1.49016	7.60035e-85
P2RX1	-1.48962	8.28258e-70
SMAD9	-1.48931	6.31236e-72
PLEKHH2	-1.48697	6.66893e-77
FLRT2	-1.48574	2.69262e-64
TMPRSS2	-1.48489	7.30668e-35
C2orf71	-1.48447	1.64902e-143
FILIP1	-1.48433	4.25512e-85
CIDEC	-1.48357	7.76983e-40
WFIKKN2	-1.48332	9.37517e-122
CR1	-1.48215	2.56153e-46
SLC6A4	-1.4782	2.50853e-34
COL6A6	-1.4778	3.67252e-59
CHGA	-1.47711	3.21291e-32
MTTP	-1.47618	1.03679e-58
ADH6	-1.47564	5.52949e-58
C21orf62	-1.4748	2.58602e-117
FAM149A	-1.47258	8.35871e-84
SCN3B	-1.4707	3.3625e-71
DOK6	-1.46907	1.12444e-75
TIMP4	-1.46899	1.22868e-52
RNASE4	-1.46878	8.42703e-116
GLP2R	-1.46794	2.22278e-180
CLEC4G	-1.46747	1.51944e-101
CBX7	-1.46648	2.25423e-179
PRKG2	-1.46617	2.70191e-64
FAM124A	-1.46566	7.97748e-113
PCDHGB5	-1.46291	8.3397e-39
CFL2	-1.46228	1.64557e-196
LRRC19	-1.46165	4.71963e-91
TMEM47	-1.46064	9.15279e-101
LOC399959	-1.46029	1.63353e-81
SCGB3A1	-1.45994	3.71414e-24
RYR3	-1.45981	3.33539e-71
KCNAB1	-1.45899	2.77398e-97
CSRNP1	-1.45819	1.54264e-151
DIRAS3	-1.45741	2.98688e-57
PIP5K1B	-1.45694	4.49246e-58
ART4	-1.45657	1.60846e-81
NTF3	-1.45576	1.19277e-72
RXRG	-1.45523	4.10997e-60
PREX2	-1.45516	7.41477e-54
SPEG	-1.45147	1.18784e-52
DPYS	-1.45118	6.65646e-62
CTGF	-1.4501	3.39544e-74
LOC255167	-1.44932	4.08536e-47
FRMD1	-1.44898	1.07023e-73
HGF	-1.44869	4.5589e-64
CAND2	-1.44781	2.07464e-85
CDKL1	-1.44749	5.03399e-123
OLFML1	-1.44697	6.68827e-100
CYP3A4	-1.44519	9.54994e-94
G6PC	-1.44411	2.53769e-76
TIMP3	-1.44333	7.1053e-86
NLGN1	-1.44258	3.7534e-63
MYOZ2	-1.44214	4.51537e-95
LRCH2	-1.44093	5.97567e-74
CHP2	-1.43737	5.61958e-42
PCDH10	-1.43568	1.19551e-38
MAN1C1	-1.43553	2.88485e-84
EPB41L3	-1.43514	3.45322e-94
GYPC	-1.43415	2.34013e-122
TAL1	-1.43403	9.62167e-117
EPHX2	-1.43161	1.86315e-95
ZG16	-1.43105	2.4424e-87
SHE	-1.43099	1.08346e-94
IL6ST	-1.4306	3.8564e-53
ITPR1	-1.42991	6.84046e-98
NEU4	-1.42947	2.47342e-61
CES4	-1.42903	2.26924e-43
PCP4L1	-1.42809	2.24531e-37
SIGLEC11	-1.42694	8.1451e-92
HSPB2	-1.42564	5.70321e-89
WFDC1	-1.42562	7.01981e-76
WASF3	-1.42513	3.27316e-80
CCDC141	-1.42507	2.27269e-87
SCTR	-1.42503	2.89053e-60
ASTN1	-1.42361	2.99813e-49
FREM2	-1.42334	1.31103e-24
FCGBP	-1.42201	6.28441e-34
COL4A4	-1.42188	5.04366e-57
GPR17	-1.41993	8.67129e-113
ZNF385B	-1.41944	1.9221e-32
AGR3	-1.4187	3.47476e-21
AQP3	-1.41676	8.56159e-37
SH3GL3	-1.41654	5.19219e-72
S1PR1	-1.41515	8.45559e-122
IRX2	-1.41456	5.81339e-34
MPPED2	-1.41443	1.49237e-46
CSRP1	-1.41396	3.20165e-232
KCNT2	-1.41285	1.18939e-72
FERMT2	-1.41225	4.81439e-151
CACNA2D2	-1.41109	7.76181e-44
ROR1	-1.41078	1.03957e-63
HSPA2	-1.41011	2.94747e-73
SLC15A2	-1.40943	1.09314e-60
C14orf64	-1.40926	2.74424e-70
CNTNAP3	-1.40887	2.08485e-52
RCAN1	-1.40842	1.85496e-113
FMO5	-1.40692	4.20865e-53
CRYM	-1.40545	3.85726e-35
ZNF781	-1.40514	7.89004e-131
CMAH	-1.40505	8.72978e-81
SGEF	-1.40459	6.78766e-77
C5orf23	-1.40404	3.05621e-41
CD302	-1.40396	6.12534e-160
NOVA1	-1.40379	5.0666e-38
TOX	-1.4037	1.34546e-53
SNCA	-1.402	8.59965e-77
FRY	-1.40153	1.6467e-104
KBTBD12	-1.40104	1.27699e-42
LDHD	-1.39952	1.71602e-56
ABO	-1.39948	8.61687e-41
CACNB4	-1.39937	2.87807e-63
TNNT2	-1.39901	1.44452e-51
VIP	-1.39694	2.15351e-93
MYLK3	-1.39684	4.31103e-81
SGCD	-1.39537	8.10063e-46
STON1	-1.39455	2.87781e-102
FGF1	-1.39356	1.71643e-70
ZNF536	-1.39345	8.38136e-77
SAMD5	-1.39257	5.58678e-51
MYOT	-1.39205	3.72585e-61
GCNT4	-1.39184	3.27196e-69
KLB	-1.39152	1.61485e-60
PACRG	-1.3914	3.64429e-60
MAOA	-1.39106	9.8109e-56
PROX1	-1.39014	6.1984e-53
GABRP	-1.38939	9.05744e-18
PTGS2	-1.38937	1.25223e-33
PITPNM3	-1.38878	4.31604e-89
FIBIN	-1.3875	5.13319e-48
CSF3	-1.38735	6.87709e-38
DNAH9	-1.38686	6.43707e-44
LGALS2	-1.38523	9.7309e-38
C1QTNF2	-1.38364	1.50664e-89
ANKS1B	-1.38332	2.67435e-81
LTF	-1.3829	5.5553e-15
SLC16A7	-1.38268	1.82003e-64
OLFM4	-1.38187	4.2152e-18
ERVFRDE1	-1.38162	5.22323e-133
DIXDC1	-1.38114	3.20606e-161
PTGER4	-1.38054	1.05575e-96
ECHDC3	-1.37938	2.6282e-52
GRRP1	-1.3792	6.63405e-105
RGS6	-1.3781	3.45812e-54
GIMAP8	-1.3777	6.94762e-119
BHMT	-1.37752	2.74587e-44
PLXNA4	-1.37704	8.7152e-48
RUNDC3B	-1.37632	6.74979e-88
CD1C	-1.37623	1.6336e-44
EFHC2	-1.37558	3.90103e-53
ADRB2	-1.37557	1.37048e-69
CCDC152	-1.37495	2.67586e-95
SFTPD	-1.37477	9.79686e-46
RNF112	-1.37346	5.11519e-105
PTPRB	-1.37281	6.5824e-109
NBEA	-1.37261	1.47792e-61
AFM	-1.37227	5.43273e-109
C6orf186	-1.37108	2.87421e-91
RASL11A	-1.37042	3.4354e-81
SPARCL1	-1.37001	5.65581e-82
EFCAB1	-1.36833	2.89105e-49
UGT2B7	-1.3682	3.11514e-40
KCTD8	-1.36752	1.37504e-107
SLC26A3	-1.36667	8.90418e-42
FGFBP2	-1.36563	6.19374e-39
ZNF471	-1.36556	7.47854e-68
FAM13C	-1.36534	9.87462e-76
TRPV6	-1.36493	2.59016e-30
PALM	-1.36476	1.22211e-66
ACTC1	-1.36359	1.49804e-28
C10orf107	-1.36309	8.4039e-54
ACSS3	-1.3614	6.84984e-53
CHGB	-1.3607	1.45974e-20
RADIL	-1.36015	1.51101e-63
HSPB3	-1.35882	2.81588e-71
C17orf91	-1.3587	1.35664e-143
FAIM2	-1.35762	1.33029e-41
TMTC1	-1.3566	6.20408e-59
NRG2	-1.35596	9.22789e-65
C8orf85	-1.35547	1.62635e-45
AVPR1A	-1.35538	8.05956e-53
KCNMA1	-1.35524	3.45893e-49
TUB	-1.35509	6.48131e-64
C3orf15	-1.35475	7.87752e-48
TMEM72	-1.35469	1.22921e-102
KBTBD11	-1.35332	1.38059e-75
C14orf139	-1.3525	1.18294e-97
SORCS2	-1.35194	5.50893e-34
RPS6KA6	-1.35172	1.45745e-39
ADAMTSL1	-1.35046	3.82647e-55
NPTX1	-1.35034	1.88924e-37
NNAT	-1.34892	4.76248e-63
CYP4F2	-1.3482	8.7405e-48
ANGPTL5	-1.34784	5.55471e-180
SLC34A1	-1.34739	8.06088e-75
CDKN1C	-1.34727	1.2857e-87
CAV1	-1.34701	1.54176e-77
CLU	-1.34578	1.20064e-47
PCDHGA2	-1.34495	2.04536e-55
P2RY14	-1.34484	7.21473e-93
LCN10	-1.34468	1.35245e-54
AKAP6	-1.34448	1.15231e-82
GPBAR1	-1.3439	1.85144e-103
PRX	-1.34331	6.48631e-127
KCNJ12	-1.34233	7.50531e-52
VTN	-1.34197	1.37031e-43
DSCAML1	-1.34102	3.73677e-49
MOGAT2	-1.34011	1.66695e-63
SLC8A1	-1.33844	1.64909e-89
C8orf79	-1.33724	3.11136e-53
C6orf155	-1.33664	1.30406e-80
TRPM3	-1.33644	2.68249e-66
SLC16A2	-1.33618	9.78397e-83
AGTR2	-1.33616	1.71187e-60
NELL1	-1.33553	7.05284e-29
NPR3	-1.33498	3.47811e-35
SOX7	-1.33341	2.58004e-86
ARHGAP24	-1.33328	3.36599e-106
RBP5	-1.33208	1.80333e-49
UPB1	-1.33144	1.33467e-65
CCL19	-1.33111	5.37584e-19
TPPP	-1.33092	8.03185e-54
HEPACAM	-1.33069	1.61821e-84
NOSTRIN	-1.33025	1.66566e-70
RASSF9	-1.32969	2.20817e-55
PCDHGB6	-1.3296	4.08429e-57
THRB	-1.32891	8.27631e-71
RCAN2	-1.32727	6.88267e-82
CNRIP1	-1.3259	2.4705e-128
CRYAA	-1.32546	1.50993e-78
CYP39A1	-1.3249	3.81269e-44
EGF	-1.32396	9.77585e-30
FOXI1	-1.32286	2.45606e-28
LPAR1	-1.3223	2.37802e-78
SLC27A6	-1.32214	9.47146e-31
STEAP4	-1.32125	1.1238e-37
KCNJ10	-1.32113	7.01645e-48
FAM162B	-1.32017	1.80801e-88
MARCO	-1.31974	2.56673e-22
GNAL	-1.31953	2.19077e-63
BTG2	-1.31893	2.05421e-93
RECK	-1.31826	9.31123e-124
SLC26A4	-1.31783	1.28507e-39
VEPH1	-1.31644	8.12867e-48
AGXT	-1.31546	1.85488e-71
KHDRBS2	-1.31496	4.77639e-106
WNT9B	-1.31365	2.57041e-130
CA8	-1.31352	1.72714e-31
CFP	-1.31332	1.23112e-69
RBPMS2	-1.31265	3.29281e-75
CXCL2	-1.31123	6.82606e-31
COLEC12	-1.31094	2.03049e-42
TMEM88	-1.30922	5.23207e-101
UST	-1.30914	2.587e-66
SULT1A2	-1.30732	1.31402e-62
UGT3A1	-1.30723	1.9123e-35
RAI2	-1.30703	6.87313e-70
EPM2A	-1.30701	4.25784e-244
DLC1	-1.30612	4.36164e-97
TWIST2	-1.3052	4.94741e-73
TF	-1.30501	2.31308e-21
PCDHA12	-1.30484	3.37129e-31
CCRL1	-1.30463	8.6608e-66
NR4A2	-1.30461	7.0731e-51
LOC643008	-1.30459	2.31455e-54
HAAO	-1.30441	7.69678e-74
STON1-GTF2A1L	-1.30432	1.46864e-54
HSPA12B	-1.30345	3.013e-105
TMEM37	-1.30177	7.3522e-78
GRIA3	-1.30121	6.74263e-44
ADRA1D	-1.30121	9.0807e-76
PCDHGA9	-1.30105	5.4695e-54
NPHS1	-1.30033	5.57908e-53
NR2F1	-1.30023	2.20621e-58
NEFM	-1.29955	4.31245e-32
FNDC5	-1.29939	4.21303e-56
GIMAP6	-1.29855	1.13848e-102
KIAA1683	-1.29835	1.71547e-59
STAC2	-1.29725	9.90612e-21
FAM167A	-1.29691	3.55106e-40
FLRT1	-1.29689	1.25564e-67
SLC47A1	-1.29688	8.93728e-41
PRKCB	-1.29665	1.38337e-50
CTXN3	-1.29564	2.57163e-87
PTGER1	-1.29453	1.41193e-89
TMEM207	-1.29401	2.36191e-290
LGI1	-1.29381	4.33025e-90
SLCO4C1	-1.29318	2.47687e-35
ALDH2	-1.29312	3.85795e-95
GPRIN2	-1.29254	1.69733e-33
CNR1	-1.2923	1.3719e-35
DACH1	-1.29216	5.10932e-38
PCDHA3	-1.29175	5.74792e-47
SULT1C4	-1.29164	1.23661e-49
SLC7A14	-1.29017	3.40846e-129
SLC6A16	-1.29015	4.02489e-70
HRC	-1.28801	5.80117e-55
KLK1	-1.28764	3.44098e-30
DGKB	-1.28755	2.15125e-71
RHOJ	-1.28681	1.40331e-112
CLDN10	-1.28677	7.79414e-19
CYP2B7P1	-1.28485	1.55083e-19
TDRD9	-1.28467	1.48147e-30
F8	-1.28439	1.98386e-124
PRG4	-1.28111	2.62329e-28
ZCCHC24	-1.28086	4.41133e-119
ESR1	-1.28085	3.8221e-27
UGT2A3	-1.28067	5.97411e-49
OLFML3	-1.28018	4.5852e-72
ADRB1	-1.27988	2.13506e-44
SH3BGRL2	-1.27926	7.62895e-91
KANK3	-1.279	4.50496e-122
ATRNL1	-1.27796	7.1273e-28
BNC2	-1.27796	4.24183e-54
GRASP	-1.27787	4.35131e-99
USHBP1	-1.27705	2.2805e-94
STARD8	-1.27694	6.97907e-118
SV2B	-1.27672	2.2802e-37
C4orf12	-1.27623	1.49847e-121
DLK1	-1.27524	1.82762e-26
SMTNL2	-1.27523	1.94563e-44
ST8SIA1	-1.27408	3.72547e-51
SNORD116-4	-1.27407	6.92908e-34
ARMCX1	-1.27367	3.52209e-98
STK33	-1.27206	4.9934e-45
TACR2	-1.2701	2.7382e-82
HYAL1	-1.26932	1.22078e-65
ABCD2	-1.26859	3.67686e-59
PARD3B	-1.26847	4.11956e-63
P2RY12	-1.26748	6.15503e-59
LRRC4C	-1.26727	1.22546e-46
TMEM232	-1.26726	3.20378e-64
CYYR1	-1.26684	6.46013e-107
ANPEP	-1.26602	1.51489e-32
PADI2	-1.26594	2.15134e-36
A2M	-1.26551	5.00451e-91
C9orf24	-1.2655	1.06664e-48
PIPOX	-1.26519	4.79891e-46
NAT2	-1.26464	9.63154e-75
LYNX1	-1.26449	3.11314e-46
NLGN3	-1.26424	1.11249e-107
LPPR1	-1.26251	1.0262e-32
SCARA3	-1.26248	2.01941e-50
RIMS4	-1.26201	1.67977e-27
CCDC48	-1.2614	1.0626e-59
SLC16A4	-1.2609	3.18257e-58
MAP3K15	-1.26027	6.46019e-74
EFHD1	-1.26015	5.85601e-53
ARSF	-1.25939	4.72967e-58
IGFBP6	-1.25913	3.83946e-41
MEIS1	-1.25904	4.63593e-89
ZNF677	-1.25868	2.91082e-79
TNMD	-1.25844	1.55418e-58
CLSTN2	-1.25685	4.23444e-30
CYP8B1	-1.25661	2.95878e-52
RIMBP2	-1.25571	6.17953e-36
TXNIP	-1.2545	7.58061e-108
KIF19	-1.25387	3.83975e-39
ITGA9	-1.25329	6.54459e-57
ZNF385D	-1.25308	1.4081e-52
GATA6	-1.25291	2.89759e-72
RORB	-1.25262	2.64662e-56
SCGB1A1	-1.2526	6.82297e-24
LTC4S	-1.25236	4.93848e-74
SGK1	-1.25229	2.28833e-84
FLRT3	-1.25183	7.01808e-28
GIMAP5	-1.25046	6.39822e-85
ZEB1	-1.24887	3.6429e-103
PDE3A	-1.24838	5.15485e-43
CDKL2	-1.24785	5.12939e-49
CAB39L	-1.24445	1.97747e-106
SLC30A8	-1.24394	3.33233e-22
PALMD	-1.24317	2.55125e-80
PAPSS2	-1.24157	4.17903e-65
RGMA	-1.24142	1.53713e-42
AMPD1	-1.24139	1.1806e-44
KLHL13	-1.2408	2.14716e-43
TLL1	-1.24071	5.89101e-48
SGSM1	-1.24025	6.49117e-50
BOC	-1.24012	3.27787e-64
TDGF1	-1.23996	1.02591e-46
KCNA4	-1.23946	1.34745e-138
GRIN2A	-1.2394	4.04333e-30
PEAR1	-1.23901	1.1775e-86
OSTBETA	-1.23795	1.43229e-61
SH3BGR	-1.23785	2.10137e-93
ZNF662	-1.23782	2.62317e-51
DTX1	-1.23683	1.18359e-68
SLC17A7	-1.23656	1.5597e-62
PAR-SN	-1.23614	1.45964e-74
ESRRB	-1.23539	2.39595e-81
LGR6	-1.23503	3.27768e-26
LOC644538	-1.23384	1.01106e-99
EMP1	-1.23379	1.19949e-76
ZBTB7C	-1.2327	8.36488e-35
C11orf92	-1.23261	2.2994e-29
SCN9A	-1.23113	3.69325e-34
ZDBF2	-1.22999	4.90986e-61
SLC5A9	-1.22948	2.27142e-53
RGS13	-1.2291	3.01443e-56
OTC	-1.229	2.52746e-103
CCL2	-1.22819	2.99727e-44
ALDH6A1	-1.22718	2.65064e-92
CHRM1	-1.2268	3.24313e-38
MYOZ3	-1.22663	2.21569e-54
SETBP1	-1.22623	1.47875e-83
KLHDC1	-1.22606	2.108e-119
PCDHA10	-1.22581	6.38666e-28
MPDZ	-1.22506	1.22245e-98
GFRA3	-1.22502	2.77729e-31
P2RX2	-1.22469	6.74847e-63
ESRRG	-1.22455	1.24574e-32
PTGS1	-1.22453	3.17192e-52
C21orf88	-1.22418	7.48415e-42
ZEB2	-1.22401	8.67709e-97
C8orf4	-1.22374	2.94906e-37
MPZ	-1.22364	4.03722e-67
CA10	-1.22358	4.28473e-45
C15orf59	-1.22354	6.84982e-40
SEMA3B	-1.22314	9.97638e-41
PPAP2B	-1.22309	6.24225e-128
PAR5	-1.22236	1.02524e-56
GPR146	-1.22235	1.6753e-127
HEPN1	-1.2214	4.5743e-83
SGCE	-1.22071	5.3865e-64
TPM2	-1.22026	1.20954e-58
CRB2	-1.21959	4.68631e-44
MUM1L1	-1.21897	2.12628e-23
ACSM2A	-1.21896	1.15534e-58
GLT25D2	-1.21888	3.7022e-37
LRRC70	-1.21844	6.14945e-111
SLC22A6	-1.21812	9.76098e-43
LRFN5	-1.2165	1.38302e-43
EBF1	-1.21644	1.20554e-75
KBTBD10	-1.21623	2.60888e-42
PCDH11X	-1.21545	1.24312e-63
SNURF	-1.21488	6.06404e-38
ST8SIA6	-1.21464	1.059e-39
LOC723809	-1.21439	4.32637e-48
C16orf45	-1.21439	9.62437e-69
PCDHGA12	-1.21425	5.73342e-53
PER1	-1.21409	3.12988e-86
CYP27A1	-1.21331	1.51397e-59
SERP2	-1.21325	2.33033e-63
CH25H	-1.21322	1.58461e-41
FOLR1	-1.2112	6.80299e-20
LAMC3	-1.21087	9.00109e-36
DDX25	-1.21028	1.13753e-67
ZNF676	-1.20958	6.00284e-46
GIMAP7	-1.20937	2.99941e-76
BBOX1	-1.20879	3.62691e-22
EPHA5	-1.20847	5.13999e-65
CUBN	-1.20822	5.39023e-54
RAMP3	-1.20807	3.7388e-67
DDC	-1.20732	2.39403e-25
RGAG4	-1.20713	2.52349e-79
FAM65C	-1.20697	3.65273e-44
KAT2B	-1.20638	6.00975e-155
TENC1	-1.20538	2.10191e-141
C16orf11	-1.20471	3.41638e-230
SOX17	-1.20451	6.6174e-77
CYP17A1	-1.20438	1.79806e-45
BTNL9	-1.20366	2.93474e-35
SLC22A7	-1.20363	1.89276e-60
CHODL	-1.20341	2.03209e-33
ZNF366	-1.20278	4.48486e-62
NME5	-1.20152	4.47211e-44
RASL12	-1.20077	2.68136e-79
APBB1	-1.20026	9.02649e-105
NCRNA00087	-1.19998	1.13382e-85
LOC283392	-1.19991	7.04007e-39
C1orf190	-1.19982	1.28357e-78
PLD5	-1.1998	5.57227e-48
LPL	-1.19942	3.10313e-35
DIO3	-1.19816	7.51485e-42
SLC16A9	-1.1979	4.80917e-27
C14orf49	-1.19772	7.07197e-73
BST1	-1.19741	3.8364e-78
LONRF3	-1.19701	1.18614e-66
HPGDS	-1.19666	1.39038e-56
TFPI	-1.19596	5.01252e-56
CITED2	-1.19564	4.72759e-100
ASB2	-1.19526	3.07384e-48
TAC1	-1.19513	5.88749e-41
DRD1	-1.19483	4.86783e-52
ADAMTS15	-1.1947	1.63687e-29
KIAA1644	-1.19448	7.03673e-34
ZNF204P	-1.19419	1.26858e-55
CYP26B1	-1.19365	2.18511e-43
DZIP1	-1.19354	7.69124e-67
OTOP2	-1.19307	6.21317e-168
EPHA3	-1.19228	3.87876e-38
FEZ1	-1.19171	1.45248e-76
MAN1A1	-1.19144	2.86225e-66
F13A1	-1.19054	9.25619e-35
NAPSA	-1.19021	4.43713e-23
ARL4D	-1.19001	3.07688e-63
PCDH15	-1.18954	3.56766e-104
SLC34A2	-1.18864	1.26153e-11
LGALS4	-1.18838	5.33581e-23
PABPC5	-1.18829	5.13689e-79
MT1L	-1.18767	1.51598e-39
FER1L6	-1.18757	4.56179e-29
DNALI1	-1.18755	1.60533e-32
PEG10	-1.18735	1.29681e-17
TPPP3	-1.1866	1.68644e-44
PBX1	-1.186	6.96125e-74
RASSF8	-1.18583	3.60759e-82
DOC2B	-1.1858	5.37808e-44
GALNT13	-1.18479	1.48365e-29
KRT24	-1.18471	3.40293e-38
COL28A1	-1.18355	2.81962e-33
SUSD2	-1.183	5.2969e-36
SLC9A4	-1.18265	1.10356e-40
MAB21L1	-1.18249	4.84507e-66
NAALADL1	-1.18163	2.06611e-82
GAL3ST3	-1.18142	6.04511e-84
BMP6	-1.18123	2.85681e-54
KANK4	-1.18097	1.25489e-26
SLC22A17	-1.18089	6.38498e-61
MAB21L2	-1.18084	6.65354e-75
JAM3	-1.18033	5.48298e-93
ACTN2	-1.17977	7.7751e-23
F3	-1.17954	8.93333e-40
GNG11	-1.17919	1.0783e-89
GSTM2	-1.17827	1.13056e-30
TACC1	-1.17821	2.60317e-103
NR1H4	-1.17757	1.68067e-57
MUC6	-1.17757	4.39482e-14
LOXL4	-1.17705	1.27039e-33
ELMOD1	-1.17674	1.37303e-60
ASS1	-1.17574	4.57788e-45
ABLIM3	-1.17433	5.23811e-47
AMT	-1.17403	4.92627e-55
PELI2	-1.174	1.17396e-72
GGTA1	-1.17377	6.24094e-68
BEND5	-1.17332	1.26961e-60
TRIM58	-1.17189	1.13734e-28
SLC23A1	-1.17162	1.24769e-38
PDLIM2	-1.17155	9.86585e-127
PPP1R1B	-1.17057	6.35535e-16
PAPPA	-1.17008	3.14461e-39
UPP2	-1.1692	3.71473e-86
WDR78	-1.16903	2.5049e-67
ABCC6	-1.16835	8.43785e-39
RRAD	-1.16828	1.74334e-29
KCNIP4	-1.16824	7.2051e-106
SERPINA6	-1.16806	3.12212e-18
COL25A1	-1.16778	2.87188e-36
PZP	-1.16778	1.4989e-55
C1orf115	-1.16679	5.75619e-67
ADRA2A	-1.16656	8.55419e-31
SLPI	-1.16498	3.76123e-15
TSPYL5	-1.16486	3.54422e-42
ST6GALNAC6	-1.16486	1.03542e-189
PPP1R3C	-1.16475	7.98957e-38
FAM3B	-1.16473	6.36186e-16
CPM	-1.16472	2.54283e-54
FOXF1	-1.16449	2.23864e-69
PRDM5	-1.16439	1.11203e-76
TCEAL5	-1.16428	6.55616e-87
IL11RA	-1.1635	2.85901e-109
GPLD1	-1.16328	2.58161e-52
SH3BP5	-1.16252	4.94327e-105
ENDOU	-1.16103	6.39621e-57
C20orf160	-1.16077	1.19227e-92
C6orf105	-1.16073	1.12888e-28
ENTPD3	-1.16046	9.35748e-38
SYT4	-1.16039	1.45023e-46
PCDP1	-1.15997	9.30598e-35
RBM20	-1.15963	1.3838e-42
DEFB1	-1.15932	7.67591e-18
SLC5A2	-1.15884	7.32753e-55
DPYD	-1.15777	5.7682e-70
MAGI2	-1.15753	3.03787e-92
ZC3H12B	-1.15722	5.08359e-88
SPHKAP	-1.15654	3.96887e-61
APOB	-1.15524	8.72443e-30
AQP8	-1.15254	4.16251e-73
GPT	-1.15105	3.2994e-29
CTNND2	-1.15097	5.56508e-23
PTPN21	-1.15036	8.07123e-128
FAM65B	-1.15029	2.80518e-44
SLC7A2	-1.14982	6.04841e-23
STX11	-1.14972	1.67249e-72
SCD5	-1.14969	2.9521e-47
ADAMTS19	-1.14966	5.25482e-42
SMOC2	-1.1495	5.85924e-35
HSD17B2	-1.14945	5.57333e-22
KANK2	-1.14857	4.45922e-141
TTLL7	-1.14702	6.34275e-39
LIX1	-1.1465	4.56778e-31
FAT3	-1.1458	3.64892e-36
DMRT2	-1.14576	1.78711e-27
ATP6V1G2	-1.1457	9.47504e-82
CDH23	-1.14479	2.54473e-40
ACTA2	-1.14467	8.64858e-57
PBLD	-1.14297	8.51411e-89
MRVI1	-1.14279	7.32907e-70
PPAPDC3	-1.14217	3.31858e-66
PTGER2	-1.14185	8.65731e-47
LOC121838	-1.14171	4.83871e-41
PCDHB4	-1.14075	7.80309e-58
RICH2	-1.14026	3.17834e-57
PRDM8	-1.14009	3.55102e-54
PDE5A	-1.13992	2.28848e-56
MS4A2	-1.13968	1.86374e-34
LSAMP	-1.13967	1.90342e-36
BTC	-1.13932	1.25081e-52
GADD45B	-1.13896	2.60901e-72
SLC25A25	-1.13872	3.44835e-125
CFTR	-1.13861	1.78229e-20
ECSCR	-1.13825	1.82531e-83
LOC643763	-1.13824	3.55728e-46
ITIH3	-1.13809	1.35775e-41
S100B	-1.13742	4.71403e-26
RHOB	-1.13665	1.21896e-83
COL4A5	-1.13568	3.99082e-33
PCDHGB4	-1.13529	7.81347e-34
DHDPSL	-1.13351	7.17388e-36
DPF3	-1.13306	1.35964e-57
ANKRD53	-1.13298	1.458e-67
C10orf140	-1.13298	2.67577e-57
POPDC2	-1.1327	3.70249e-82
PRODH2	-1.13233	6.37776e-59
SLC38A4	-1.13211	1.84609e-23
ANTXR2	-1.13156	1.93573e-91
TMEM174	-1.13073	1.35758e-60
TLR3	-1.1307	1.22067e-57
KIAA1377	-1.13048	3.38207e-61
HBEGF	-1.13006	1.12614e-59
LOC154822	-1.12996	2.66978e-45
ATP6V0A4	-1.12983	8.28203e-18
BCAS1	-1.12959	2.88435e-18
NPAS4	-1.12945	2.76194e-140
CYP1A2	-1.12914	1.33004e-56
SNED1	-1.12883	3.98855e-72
SLC22A12	-1.1283	1.01341e-38
PCDHGA6	-1.12816	3.18017e-55
GJB1	-1.12801	1.96753e-21
EPAS1	-1.12708	3.56715e-107
MYH2	-1.12703	4.10944e-30
MOSC2	-1.12674	7.78354e-88
IYD	-1.12646	6.81255e-22
ACSM3	-1.12605	1.47897e-43
CADM1	-1.12516	3.8976e-52
C9orf125	-1.12482	5.22148e-37
HRCT1	-1.12406	8.73256e-37
PRKAA2	-1.12405	2.3338e-31
ACADSB	-1.12383	2.84611e-77
LEPREL1	-1.12358	1.14542e-40
PM20D1	-1.12323	4.06888e-43
ALDH8A1	-1.12239	2.14673e-41
ACSF2	-1.1222	3.7988e-69
NRG1	-1.1219	8.26673e-29
CYP1A1	-1.12114	2.03841e-25
LOC283174	-1.12029	6.93373e-31
ANGPTL3	-1.11838	6.76352e-52
CYP2B6	-1.11791	1.0204e-38
SLC16A5	-1.11777	4.79143e-56
TNFAIP8L3	-1.11751	2.1178e-54
SSPN	-1.11727	9.34106e-66
DSEL	-1.1166	5.11856e-53
SPOCK3	-1.11622	7.42769e-28
DNAJB4	-1.11619	3.01658e-116
SMYD1	-1.11613	9.02687e-36
IPCEF1	-1.11544	2.47502e-47
TMEM82	-1.11475	7.40145e-44
NTN1	-1.11325	1.97472e-37
SYTL4	-1.11298	1.17594e-76
P2RX6	-1.11226	4.91575e-64
ACSM2B	-1.11195	4.09501e-51
FBXL22	-1.11194	3.81503e-104
COL21A1	-1.11031	1.01103e-27
FAM55D	-1.11018	9.03535e-54
ARRB1	-1.10971	9.43901e-102
CIDEA	-1.10966	1.91608e-34
CALB1	-1.10954	8.55696e-19
LMO2	-1.10951	1.75427e-104
FAM46C	-1.10949	4.36376e-50
TFF3	-1.10825	1.74572e-12
LRRN2	-1.10823	1.57629e-31
HSD11B2	-1.10697	7.07108e-44
MYADM	-1.10689	6.7422e-82
IHH	-1.10655	6.80442e-37
CR2	-1.10639	2.62191e-15
CYP1B1	-1.10587	1.65109e-27
NAP1L5	-1.10555	4.19107e-97
SYNGR1	-1.10542	1.13219e-53
NCAM2	-1.10469	9.50494e-28
GAS7	-1.10469	6.05439e-49
C14orf50	-1.10439	5.32427e-43
NHLRC4	-1.10376	5.3507e-51
ZNF521	-1.10373	1.40251e-49
FBLN2	-1.10324	1.17158e-36
CYP2A6	-1.10303	5.28734e-21
C10orf108	-1.1028	3.78725e-58
STAP1	-1.10245	8.19038e-32
PTPN20B	-1.10244	7.33167e-20
NACAD	-1.10193	8.68594e-46
FILIP1L	-1.1018	3.06608e-62
C10orf72	-1.10152	5.79242e-55
TGFBR2	-1.1011	2.13116e-95
HTR2B	-1.10102	9.94233e-40
COBL	-1.10093	1.57653e-34
FAM189A1	-1.10047	5.07803e-24
PRTG	-1.10033	4.73416e-42
AFAP1L2	-1.09961	1.94795e-60
STARD13	-1.0995	5.39282e-104
L3MBTL4	-1.09947	2.76668e-37
CRABP1	-1.0991	1.36755e-13
SPG20	-1.09861	1.61623e-121
MS4A12	-1.09806	1.14935e-98
CPXM2	-1.09797	2.28321e-29
KCNJ3	-1.09728	3.13175e-18
PDZD2	-1.09727	7.269e-45
AJAP1	-1.0972	2.4952e-34
ACPP	-1.09716	7.36479e-41
ADH4	-1.09632	4.82809e-49
CA2	-1.09567	6.80128e-30
PLA2G4F	-1.09335	2.58195e-25
EPHB6	-1.09318	5.97009e-33
CXCL14	-1.0927	8.62616e-13
AASS	-1.09253	7.08929e-67
KLHL33	-1.0925	5.84058e-182
CLIC6	-1.09243	5.82166e-16
CTF1	-1.09234	3.58509e-54
GVIN1	-1.09216	1.43267e-43
RXFP1	-1.09189	1.22086e-57
NPY6R	-1.08992	1.67991e-40
ZNF727	-1.08951	7.66547e-47
LOC339535	-1.08891	2.90193e-15
LUM	-1.08878	2.97361e-23
KRT4	-1.08852	3.72843e-14
GEM	-1.08847	9.9448e-48
ABCC8	-1.08842	1.32815e-21
LINGO2	-1.08803	5.18505e-47
C9orf135	-1.08793	1.81305e-51
SYP	-1.08773	2.33206e-50
CRISP2	-1.08762	5.15346e-52
EMX2OS	-1.08727	3.78309e-33
GLT8D2	-1.08698	4.48157e-46
TDRD10	-1.08586	1.11549e-47
ZNF835	-1.08512	4.53885e-62
SCGB2A1	-1.0847	1.50384e-19
KCTD12	-1.08459	2.57013e-75
PPM1K	-1.08415	1.1364e-79
GLIPR1L2	-1.0839	8.80461e-67
KIRREL3	-1.08383	1.92466e-41
C1QTNF9	-1.08378	8.73661e-84
LOC144571	-1.0837	3.15332e-114
ZMYND12	-1.08324	2.8858e-62
C20orf56	-1.08271	1.3609e-31
PCDHGA3	-1.08201	1.4855e-42
CAT	-1.08161	3.18063e-134
MAP1LC3C	-1.08029	5.56569e-52
MSRA	-1.07947	3.45198e-105
ZCWPW2	-1.07926	5.46686e-136
COLEC11	-1.07899	1.29079e-35
FRMD7	-1.07899	4.23027e-92
UGT1A8	-1.07867	2.33966e-25
SUSD5	-1.07811	7.20492e-36
CYP3A5	-1.07797	1.03985e-27
CACNA2D3	-1.07747	7.63658e-39
VWA5A	-1.07683	5.51866e-69
GYPE	-1.07676	4.64738e-90
C1orf173	-1.07614	3.11409e-21
HPCAL4	-1.07609	4.67719e-32
BMP2	-1.07581	2.15662e-40
PLAC8	-1.07578	9.29091e-26
NXPH2	-1.07536	2.04672e-53
FOLR3	-1.07493	5.6265e-50
WNK4	-1.07428	4.16554e-19
NAP1L6	-1.07327	1.49246e-37
ADCY2	-1.07322	4.64485e-22
DMBT1	-1.07229	2.64324e-13
PTPRZ1	-1.07224	1.82814e-18
IGFALS	-1.07212	3.80111e-29
RNF212	-1.07201	5.04758e-21
PNPLA7	-1.0719	1.68858e-48
MYRIP	-1.07162	6.37048e-30
CPEB3	-1.07155	1.75203e-140
EYA2	-1.07126	7.1221e-23
PHACTR1	-1.07007	8.76637e-62
WSCD1	-1.06986	5.72396e-44
C2orf54	-1.06963	2.00633e-17
CACNB2	-1.06935	2.73645e-50
FCER2	-1.06934	4.98435e-28
EIF4E3	-1.06933	1.26799e-117
OLFM3	-1.06921	1.59454e-63
SYDE2	-1.06919	3.37433e-66
SASH1	-1.06898	3.1919e-90
EML1	-1.06889	1.03847e-69
MMRN2	-1.06885	7.14823e-79
FAM82A1	-1.0681	6.95241e-117
NR0B2	-1.06792	6.92516e-35
PLA2G5	-1.06641	2.30949e-42
BEX4	-1.06609	4.72374e-68
ADAMTSL4	-1.0652	2.62303e-45
PDE1B	-1.06493	7.75558e-55
PYGO1	-1.06486	1.56369e-48
CMYA5	-1.06446	7.01589e-31
DMRTA1	-1.0644	1.69758e-31
MEOX1	-1.06425	1.07577e-29
CYP21A2	-1.06392	2.17591e-32
AGAP11	-1.06366	1.835e-43
CPS1	-1.0635	4.67407e-16
APCDD1L	-1.06343	5.79084e-24
PCDH7	-1.06312	2.25312e-29
NWD1	-1.06302	5.87083e-22
NOL4	-1.06211	6.22583e-28
TSPAN11	-1.06193	1.09896e-35
FRAS1	-1.06145	5.00506e-26
KIAA1462	-1.06078	1.80747e-69
ROBO4	-1.05995	7.85949e-80
CLIP3	-1.05964	6.59433e-55
ARHGEF4	-1.05937	8.32837e-32
CLEC1A	-1.05934	3.47499e-70
ADCY4	-1.05891	2.0812e-70
CLIC2	-1.05889	3.5426e-73
C13orf33	-1.05855	3.19153e-34
VWA3B	-1.05826	8.57067e-41
CASP12	-1.05737	2.96159e-117
ASPDH	-1.05722	2.30817e-58
PTPLA	-1.05697	1.47238e-38
LHFPL3	-1.05686	8.38807e-51
BDKRB2	-1.05639	1.23708e-44
AQP6	-1.0562	2.12657e-30
ZNF423	-1.05605	3.11134e-49
ARHGAP10	-1.05559	1.38811e-87
CPVL	-1.05542	3.39504e-45
SLC16A11	-1.05529	7.24219e-36
GIMAP1	-1.05473	8.32095e-66
PAK3	-1.05453	8.05879e-37
PLCL2	-1.05391	4.24242e-64
ODZ2	-1.05368	3.40769e-17
CSRNP3	-1.05308	1.51919e-56
RASL11B	-1.05307	2.91987e-34
SLC9A9	-1.05179	5.55893e-62
FAM3D	-1.0517	6.96645e-19
SALL2	-1.05078	5.20496e-47
SFTPA2	-1.05056	4.73672e-14
CXCR2	-1.05037	1.60197e-38
KCNA6	-1.04951	5.59684e-43
GADL1	-1.04932	2.4189e-130
SYCE1	-1.04887	1.03351e-26
ENPP2	-1.0487	4.86096e-38
RPS6KA5	-1.04691	1.5988e-83
RYR2	-1.04625	6.49999e-23
SSC5D	-1.04573	2.78255e-32
ITGB3	-1.04502	1.50778e-37
KCNJ8	-1.04473	2.18651e-60
GUCA2A	-1.0442	8.24245e-75
CDHR3	-1.04337	5.58163e-26
CCDC8	-1.04237	3.21673e-29
ADCYAP1R1	-1.04203	7.14155e-71
CCL14-CCL15	-1.04192	1.60758e-40
FAM23A	-1.04148	2.17338e-55
AGXT2	-1.04127	4.04679e-45
IRX6	-1.04107	9.45508e-19
PTGDR	-1.0409	1.84687e-55
TMEM139	-1.04015	7.01307e-23
DNAH6	-1.0385	3.11886e-34
ZNF454	-1.03831	1.87355e-61
MEG3	-1.03812	8.66942e-27
MITF	-1.03792	5.31305e-74
SLC4A9	-1.03766	1.00963e-91
GPR110	-1.03746	1.52875e-14
BACH2	-1.03719	3.86372e-45
PYY	-1.03713	2.43048e-43
FCN1	-1.03691	5.44853e-26
GPR123	-1.0365	2.70446e-67
HUNK	-1.03576	6.69585e-29
SCN2A	-1.03512	1.14046e-24
LRP2	-1.035	1.78072e-12
NRN1	-1.03442	9.01671e-32
DMRTC1B	-1.03327	6.92665e-41
LILRB5	-1.03275	9.00578e-32
GSN	-1.03261	3.73064e-89
PCDHB5	-1.03261	4.93149e-25
C1orf175	-1.03249	1.06477e-32
SLC28A2	-1.03211	1.90348e-38
RIMS3	-1.03205	7.1774e-46
FBP1	-1.03187	3.54116e-33
THBD	-1.03169	2.43019e-48
KIF17	-1.03012	7.40788e-77
KLRF1	-1.02985	5.17329e-49
MIA2	-1.02971	4.2165e-40
FMOD	-1.02935	2.35979e-35
RND2	-1.0291	3.36268e-30
CPA3	-1.02876	5.71648e-19
ZNF208	-1.02875	1.77462e-26
MUSK	-1.02867	9.21822e-123
DDO	-1.02841	6.39257e-46
APOA1	-1.0283	3.94119e-34
AHNAK	-1.02804	2.83374e-77
C1orf88	-1.02782	3.9276e-31
LIMCH1	-1.02761	9.51949e-53
ARHGEF15	-1.02667	1.09999e-71
SLC22A2	-1.02636	1.51801e-39
GCGR	-1.02538	3.08106e-33
LIPC	-1.02509	6.33673e-34
MRAP2	-1.025	7.42217e-24
CCDC89	-1.02494	2.71644e-55
SERPING1	-1.02454	1.08973e-51
FGD5	-1.02381	2.81532e-62
SERPINA3	-1.02375	1.5549e-12
SERPIND1	-1.02366	1.82515e-25
ANO3	-1.02246	1.57701e-26
GPR98	-1.02104	1.7905e-18
FTCD	-1.01983	1.42876e-24
AZGP1	-1.01965	2.96679e-13
TMEM61	-1.01843	2.38829e-30
RNASE1	-1.01773	1.04754e-50
PLIN5	-1.0176	4.07449e-24
KCNN2	-1.01759	4.35772e-50
GCG	-1.01697	7.96629e-111
MGLL	-1.01661	4.75081e-61
CAPN3	-1.01638	1.73374e-34
AQP5	-1.01624	3.30989e-12
D4S234E	-1.01606	4.36187e-21
C5	-1.01588	5.34817e-48
ZNF334	-1.01583	5.8222e-28
RNF125	-1.01565	1.74696e-75
GLIPR2	-1.01516	4.87994e-64
C10orf128	-1.01491	3.39046e-51
THSD7A	-1.0149	7.23107e-33
FMO4	-1.01474	1.44034e-75
EFS	-1.0147	2.24832e-38
RBP7	-1.01452	2.40661e-37
CTNNA3	-1.0145	2.55647e-98
PLA2G4A	-1.01429	2.91271e-30
SOST	-1.01424	3.63824e-27
PMP22	-1.01381	5.86169e-63
AKAP3	-1.01381	8.26803e-53
HFM1	-1.01352	2.38437e-65
ENOX1	-1.01348	2.12759e-46
NXF3	-1.01317	3.06177e-46
BCO2	-1.01287	5.14785e-40
LRRC3B	-1.01286	3.51768e-74
ODAM	-1.01196	2.48647e-21
PTRF	-1.01162	8.31287e-78
TSHZ2	-1.01142	6.07392e-34
DYNC2H1	-1.01142	4.27573e-58
ID1	-1.01101	1.13034e-38
GUCA2B	-1.01097	1.17984e-50
PRKCQ	-1.01094	2.35109e-33
SRD5A2	-1.01094	7.02106e-35
FOXI2	-1.01082	5.0787e-38
IL6R	-1.01035	4.45905e-48
ELN	-1.01029	6.85464e-23
CLDN18	-1.01028	3.21204e-22
NTS	-1.00918	6.69408e-11
TBX3	-1.00881	3.44689e-40
MEF2C	-1.0086	1.8079e-69
IGFBP5	-1.00781	1.48518e-27
RAMP2	-1.00776	7.08139e-71
GEFT	-1.00763	5.76549e-63
LHFP	-1.00755	5.57048e-69
CNGA1	-1.00678	6.13102e-28
C9orf103	-1.00642	6.06854e-109
ITGA7	-1.00608	1.35941e-41
CRISP3	-1.00591	1.18071e-13
ELANE	-1.00554	2.32872e-78
GPR44	-1.00524	3.54993e-66
B4GALNT2	-1.00433	9.67487e-17
ANG	-1.00425	1.58735e-54
ARRDC4	-1.00364	2.95295e-72
PER3	-1.00309	4.87138e-59
CLIP4	-1.00304	1.21939e-52
ITLN2	-1.00284	1.25605e-45
FAM166B	-1.00227	5.12013e-37
TCF7L1	-1.00185	2.41555e-47
CACHD1	-1.00177	5.94242e-45
CLEC9A	-1.00177	9.19875e-47
MT2A	-1.00142	1.52819e-34
KLF6	-1.0011	1.87504e-75
PTPRN2	-1.00083	2.78942e-30
