# Supplementary material for: Transcriptome Analysis of Recurrently Deregulated Genes across Multiple Cancers Identifies New Pan-Cancer Biomarkers
Source: Oxford University Press journal article supplement (doi:10.1158/0008-5472.can-15-0484), 2015-11-09
Supplement: 00085472can150484-sup-145596_2_supp_3145142_n6pkmp.xlsx [file 00085472can150484-sup-145596_2_supp_3145142_n6pkmp.xlsx]

## Sheet: UP
Supplementary table 5A. Results of enhancerRNA (eRNA) Differential Expression Analysis by EdgeR
	matched solid		matched blood		unmatched solid
enhancer	log2 FC Cancer vs. Normal	BH adj p-value	log2 FC Cancer vs. Normal	BH adj p-value	log2 FC Cancer vs. Normal	BH adj p-value	DE type	type	summary
chr7:1560213-1560697	6.12134	0.00227617	2.85328	0.259342	3.10913	2.34318e-10	UP	Solid only	Solid_UP
chr3:138364761-138365360	6.05621	0.000151315	0.87692	0.0394864	2.11784	1.40971e-09	UP	Solid only	Solid_UP
chr16:57717053-57717380	5.97332	1.36915e-05	4.958	3.88629e-15	5.51566	4.78781e-37	UP	Pan	Pan_UP
chr15:67490281-67490446	5.61241	0.000274354	0.552327	0.357697	2.3619	5.10183e-11	UP	Solid only	Solid_UP
chr6:13602068-13602103	5.56701	0.0094956	3.95454	1.12538e-06	2.46596	9.31242e-08	UP	Pan	Pan_UP
chr2:102383406-102383725	5.51067	0.00632167	2.58693	0.048607	2.60479	2.6879e-07	UP	Solid only	Solid_UP
chr1:234728712-234729023	5.30166	3.16678e-05	-0.660356	0.21046	2.05773	1.57325e-06	UP	Solid only	Solid_UP
chr17:75120383-75120864	5.26575	7.11241e-07	0.958637	0.291536	3.03469	3.81567e-17	UP	Solid only	Solid_UP
chr3:9422978-9423353	5.16552	0.000230501	1.34193	0.00271888	2.86911	1.52177e-22	UP	Solid only	Solid_UP
chr17:7389589-7389989	5.07827	0.00288117	0.604891	0.259342	2.27097	2.30093e-09	UP	Solid only	Solid_UP
chr6:27759985-27760333	5.06568	0.000209412	4.45568	1.57795e-12	3.10508	1.41517e-19	UP	Pan	Pan_UP
chr17:15959345-15959465	4.77007	0.00132621	-0.0447601	0.962275	2.05009	4.1875e-11	UP	Solid only	Solid_UP
chr20:50383575-50384083	4.64777	0.000367051	-2.7576	0.0587468	2.11377	6.4925e-15	UP	Solid only	Solid_UP
chr15:30022522-30022814	4.57162	0.0094956	1.69489	0.0497373	2.03503	7.05607e-09	UP	Solid only	Solid_UP
chr7:23510676-23511223	4.55763	0.000422495	7.2017	3.35056e-25	2.59297	3.1076e-19	UP	Pan	Pan_UP
chr3:182645862-182646115	4.44137	0.00310957	1.48682	0.000605464	2.11062	1.63903e-10	UP	Solid only	Solid_UP
chr12:6717352-6717716	4.26808	0.00761959	3.44931	1.53278e-11	2.15596	1.56799e-10	UP	Pan	Pan_UP
chr11:2669931-2670236	4.21899	0.00364832	1.44854	0.00730172	2.03653	1.1945e-07	UP	Solid only	Solid_UP
chr3:138582294-138582582	4.00436	1.23065e-05	4.00772	2.66411e-12	3.56286	3.88135e-28	UP	Pan	Pan_UP
chr12:112341708-112342051	3.71246	0.004974	2.09708	3.22508e-07	2.55849	4.77654e-19	UP	Pan	Pan_UP
chr16:72459158-72459630	3.24947	0.00104023	3.8919	2.73276e-18	2.71833	1.05584e-25	UP	Pan	Pan_UP
chr1:228783266-228783899	2.71381	0.000100744	4.7233	9.88801e-12	3.04115	3.88135e-28	UP	Pan	Pan_UP
chr1:147080043-147080251	2.70854	0.000831491	1.1595	0.0123673	2.59496	1.23561e-17	UP	Solid only	Solid_UP
chr12:122908043-122908483	2.33493	0.00276445	2.81645	2.76455e-11	3.06033	1.35532e-25	UP	Pan	Pan_UP
chr20:50366772-50367203	2.29727	0.00393987	0.0750605	0.991946	2.50377	1.60725e-09	UP	Solid only	Solid_UP
chr2:10260365-10260994	2.23913	0.00234335	3.16568	3.7838e-19	2.08969	7.96746e-19	UP	Pan	Pan_UP

## Sheet: ON
Supplementary table 5B. Results of enhancerRNA (eRNA) ON and OFF analysis by Fisher's exact test.
							ON and OFF analysis (Fisher's exact test)
	Frequencies of expression in CANCER			Frequencies of expression in NORMAL			matched solid		matched blood		unmatched solid
enhancer	matched solid	matched blood	unmatched solid	matched solid	matched blood	unmatched solid	log2 gain	fisher adj pv	log2 gain	fisher adj pv	log2 gain	fisher adj pv	type	type1	summary2
chr7:57639323-57639702	0.319	0.157	0.275	0	0.041	0	5.04002	0.000146948	1.71128	0.169026	4.83289	5.05353e-12	ON	Solid only	Solid_ON
chr13:64652316-64652644	0.306	0.235	0.284	0	0	0.005	4.98185	0.000207525	4.61471	0.000209823	4.29278	2.48999e-11	ON	Pan	Pan_ON
chr5:137815410-137815785	0.278	0.098	0.363	0	0.054	0.02	4.848	0.000561494	0.754888	0.774917	3.63614	1.07315e-12	ON	Solid only	Solid_ON
chr1:27383957-27384315	0.236	0.078	0.216	0	0.014	0.01	4.62059	0.00240424	1.87447	0.37793	3.49825	2.00582e-07	ON	Solid only	Solid_ON
chr19:3562421-3562565	0.236	0	0.225	0	0.014	0.02	4.62059	0.00240424	-0.0201376	1	2.96963	1.22799e-06	ON	Solid only	Solid_ON
chr7:1416814-1417157	0.236	0.118	0.265	0	0.041	0.015	4.62059	0.00240424	1.32757	0.37793	3.45943	7.50044e-09	ON	Solid only	Solid_ON
chr14:39664073-39664414	0.222	0.137	0.196	0	0.041	0.02	4.53605	0.00417048	1.52725	0.254533	2.77961	1.78794e-05	ON	Solid only	Solid_ON
chr19:10949257-10949551	0.222	0.314	0.206	0	0.081	0.03	4.53605	0.00417048	1.83206	0.0114036	2.43296	5.75536e-05	ON	Solid only	Solid_ON
chr3:196064212-196064579	0.222	0.176	0.127	0	0.176	0.02	4.53605	0.00417048	0	1	2.19114	0.0043787	ON	Solid only	Solid_ON
chr15:67488498-67488886	0.486	0.314	0.412	0.015	0.243	0.085	4.31034	3.82844e-07	0.356856	0.704065	2.15124	2.23462e-08	ON	Solid only	Solid_ON
chr17:25416172-25416581	0.431	0.235	0.382	0.015	0.014	0.025	4.14078	6.92591e-06	3.35168	0.00117674	3.48543	6.44298e-13	ON	Pan	Pan_ON
chr1:242108255-242108348	0.403	0.098	0.324	0.015	0.068	0.025	4.04614	3.57934e-05	0.469485	0.944038	3.25442	3.68376e-10	ON	Solid only	Solid_ON
chr12:53284889-53285178	0.333	0	0.441	0.015	0.041	0.015	3.77821	0.000358083	-0.0597867	0.532356	4.17313	1.56801e-17	ON	Solid only	Solid_ON
chr17:56701235-56701661	0.319	0.275	0.216	0.015	0.122	0.03	3.71809	0.000617467	1.11042	0.138169	2.49825	2.59162e-05	ON	Solid only	Solid_ON
chr17:56706902-56707296	0.319	0.392	0.314	0.015	0.135	0.05	3.71809	0.000617467	1.47114	0.0107563	2.43296	2.48656e-07	ON	Solid only	Solid_ON
chr5:118592872-118593203	0.306	0.333	0.265	0.015	0.149	0.045	3.65992	0.00101317	1.10918	0.0799292	2.32193	6.41186e-06	ON	Solid only	Solid_ON
chr5:154062607-154063000	0.292	0.176	0.353	0.015	0	0.02	3.59455	0.00162144	4.21723	0.00242365	3.59694	3.39724e-12	ON	Pan	Pan_ON
chr16:85586399-85586765	0.278	0.392	0.324	0.015	0.068	0.025	3.52607	0.00251418	2.36565	0.000363828	3.25442	3.68376e-10	ON	Pan	Pan_ON
chr2:208472249-208472458	0.264	0.353	0.265	0.015	0.176	0.055	3.45418	0.00425933	0.964667	0.132641	2.08092	3.26944e-05	ON	Solid only	Solid_ON
chr21:17276028-17276063	0.264	0.118	0.157	0.015	0.081	0.025	3.45418	0.00425933	0.492205	0.816767	2.25442	0.0011146	ON	Solid only	Solid_ON
chr6:3254273-3254642	0.264	0.333	0.373	0.015	0.014	0.04	3.45418	0.00425933	3.8371	1.96963e-05	2.93734	1.21982e-10	ON	Pan	Pan_ON
chr1:89358212-89358439	0.514	0.392	0.627	0.046	0.189	0.075	3.22607	2.509e-06	1.01443	0.0690987	2.90576	4.81463e-20	ON	Solid only	Solid_ON
chr6:472688-472701	0.361	0.294	0.353	0.031	0.216	0.06	3.17772	0.000642491	0.427749	0.688797	2.37454	4.64933e-08	ON	Solid only	Solid_ON
chr2:74647656-74647929	0.347	0.176	0.284	0.031	0.108	0.05	3.12223	0.0011222	0.656516	0.578103	2.29278	4.61736e-06	ON	Solid only	Solid_ON
chr6:151730569-151730753	0.347	0.235	0.324	0.031	0.162	0.075	3.12223	0.0011222	0.510373	0.652652	1.97431	6.02841e-06	ON	Solid only	Solid_ON
chr1:46575103-46575175	0.333	0.118	0.235	0.031	0.108	0.035	3.06451	0.00173628	0.117357	1	2.44478	1.27864e-05	ON	Solid only	Solid_ON
chr12:20975224-20975562	0.333	0	0.412	0.031	0	0.005	3.06451	0.00173628	0	1	4.81421	6.61004e-18	ON	Solid only	Solid_ON
chr10:70735854-70735920	0.319	0.353	0.363	0.031	0.216	0.07	3.00439	0.00302931	0.683647	0.290224	2.2211	1.11642e-07	ON	Solid only	Solid_ON
chr12:104330398-104330552	0.306	0.235	0.265	0.031	0.257	0.06	2.94623	0.00481992	-0.0415464	1	1.974	8.43343e-05	ON	Solid only	Solid_ON
chr4:41936193-41936441	0.306	0.255	0.304	0.031	0.324	0.045	2.94623	0.00481992	-0.138268	0.722499	2.51326	2.33932e-07	ON	Solid only	Solid_ON
chr14:103577206-103577606	0.417	0.255	0.324	0.046	0	0.01	2.93074	0.000266694	4.72792	9.24677e-05	4.06178	2.43836e-12	ON	Pan	Pan_ON
chr12:92517978-92518398	0.639	0.588	0.676	0.077	0.851	0.15	2.89913	1.07265e-07	-1.40822	0.0119369	2.10014	8.19359e-16	ON	Solid only	Solid_ON
chr17:74723995-74724371	0.514	0.529	0.608	0.062	0.284	0.115	2.8635	1.09666e-05	0.874469	0.0450742	2.30568	3.74467e-15	ON	Pan	Pan_ON
chr17:73133469-73133809	0.389	0.373	0.245	0.046	0.068	0.035	2.83289	0.000662808	2.2958	0.000681471	2.5025	5.59174e-06	ON	Pan	Pan_ON
chr19:45980345-45980732	0.389	0.196	0.49	0.046	0.176	0.065	2.83289	0.000662808	0.147342	1	2.73697	1.08826e-13	ON	Solid only	Solid_ON
chr15:41254301-41254691	0.278	0.431	0.333	0.031	0	0.05	2.81237	0.00828202	5.46271	2.02496e-08	2.51517	4.39214e-08	ON	Pan	Pan_ON
chr3:156229646-156229758	0.278	0.196	0.186	0.031	0.108	0.04	2.81237	0.00828202	0.803857	0.447623	1.97085	0.00131395	ON	Solid only	Solid_ON
chr20:43540233-43540373	0.375	0.118	0.343	0.046	0.108	0.055	2.78136	0.00113454	0.117357	1	2.44116	4.59646e-08	ON	Solid only	Solid_ON
chr3:100482455-100482783	0.375	0.157	0.186	0.046	0.054	0.035	2.78136	0.00113454	1.3837	0.218453	2.12286	0.000826349	ON	Solid only	Solid_ON
chr5:178259703-178260206	0.375	0.373	0.363	0.046	0.054	0.005	2.78136	0.00113454	2.5812	0.000209823	4.63614	2.59947e-15	ON	Pan	Pan_ON
chr13:24528296-24528692	0.361	0.216	0.304	0.046	0.027	0.04	2.72792	0.00173917	2.61073	0.012397	2.65076	8.94772e-08	ON	Solid only	Solid_ON
chr19:47269374-47269772	0.333	0.255	0.382	0.046	0	0.05	2.61471	0.00481992	4.72792	9.24677e-05	2.70782	4.05985e-10	ON	Pan	Pan_ON
chr2:10274411-10274722	0.333	0.608	0.324	0.046	0.081	0.035	2.61471	0.00481992	2.76367	4.2055e-08	2.89185	4.60614e-09	ON	Pan	Pan_ON
chr5:138620359-138620541	0.611	0.686	0.539	0.092	0.095	0.105	2.60602	1.0511e-06	2.7287	1.73715e-09	2.25517	1.45104e-12	ON	Pan	Pan_ON
chr12:79817704-79817772	0.319	0.098	0.333	0.046	0.081	0.02	2.55459	0.00792082	0.247093	0.962447	3.51517	3.23842e-11	ON	Solid only	Solid_ON
chr6:26266741-26266990	0.319	0.255	0.265	0.046	0.081	0.045	2.55459	0.00792082	1.54205	0.0542376	2.32193	6.41186e-06	ON	Solid only	Solid_ON
chr3:141482175-141482451	0.403	0.255	0.382	0.062	0.284	0.08	2.52007	0.0011222	-0.0565071	1	2.12286	1.28549e-07	ON	Solid only	Solid_ON
chr8:125302460-125302812	0.389	0.392	0.314	0.062	0.405	0.065	2.47032	0.00173628	-0.0306717	1	2.11103	2.88917e-06	ON	Solid only	Solid_ON
chr16:89579992-89580270	0.458	0.51	0.373	0.077	0.23	0.085	2.42742	0.000358083	1.11548	0.0150375	2.01134	4.53429e-07	ON	Solid only	Solid_ON
chr5:177647239-177647603	0.375	0.353	0.353	0.062	0.216	0.065	2.41879	0.00290571	0.683647	0.290224	2.27501	1.28549e-07	ON	Solid only	Solid_ON
chr15:25564293-25564526	0.444	0.529	0.51	0.077	0.23	0.085	2.3836	0.000617467	1.16725	0.00922065	2.45251	8.53014e-13	ON	Solid only	Solid_ON
chr6:35445364-35445634	0.361	0.373	0.461	0.062	0.068	0.035	2.36535	0.00469885	2.2958	0.000681471	3.38773	1.51913e-15	ON	Pan	Pan_ON
chr8:125367728-125368050	0.361	0.294	0.422	0.062	0.135	0.06	2.36535	0.00469885	1.06802	0.148309	2.6256	6.82459e-11	ON	Solid only	Solid_ON
chr1:70709017-70709466	0.431	0.412	0.412	0.077	0.378	0.085	2.34169	0.00105892	0.121186	0.925564	2.15124	2.23462e-08	ON	Solid only	Solid_ON
chr5:177645267-177645446	0.5	0.431	0.559	0.092	0.23	0.1	2.32193	0.000208678	0.877744	0.0866433	2.37093	1.08826e-13	ON	Solid only	Solid_ON
chr15:25563100-25563402	0.347	0.333	0.314	0.062	0.203	0.035	2.30986	0.00760541	0.687355	0.355993	2.848	1.21775e-08	ON	Solid only	Solid_ON
chr19:55917170-55917359	0.472	0.549	0.48	0.092	0.176	0.085	2.24046	0.000561494	1.58755	0.000353827	2.36678	3.38202e-11	ON	Pan	Pan_ON
chr20:61506279-61506510	0.389	0.294	0.324	0.077	0.014	0.065	2.1973	0.00425933	3.66297	0.000110034	2.15489	1.28627e-06	ON	Pan	Pan_ON
chr1:94007993-94008357	0.528	0.216	0.569	0.108	0.122	0.095	2.18882	0.000240539	0.775785	0.476146	2.46317	6.80867e-15	ON	Solid only	Solid_ON
chr17:74440987-74441354	0.375	0.235	0.294	0.077	0.068	0.065	2.14577	0.00683071	1.65124	0.068866	2.01911	1.82888e-05	ON	Solid only	Solid_ON
chr2:28400759-28401210	0.431	0.471	0.52	0.092	0.405	0.11	2.11221	0.0022575	0.212926	0.844352	2.14296	3.38202e-11	ON	Solid only	Solid_ON
chr5:137881069-137881276	0.403	0.275	0.343	0.092	0.122	0.065	2.01757	0.00598465	1.11042	0.138169	2.23471	2.78071e-07	ON	Solid only	Solid_ON
chr7:23348040-23348443	0.458	0.392	0.373	0.108	0.108	0.06	1.98772	0.00183176	1.76841	0.00380472	2.45192	7.50044e-09	ON	Solid only	Solid_ON
chr1:62928310-62928608	0.444	0.412	0.353	0.108	0.108	0.06	1.94391	0.00313366	1.83846	0.00209021	2.37454	4.64933e-08	ON	Pan	Pan_ON
