# Supplementary material for: Transcriptome Analysis of Recurrently Deregulated Genes across Multiple Cancers Identifies New Pan-Cancer Biomarkers
Source: Oxford University Press journal article supplement (doi:10.1158/0008-5472.can-15-0484), 2015-11-09
Supplement: 00085472can150484-sup-145596_2_supp_3145143_nzpkmp.xlsx [file 00085472can150484-sup-145596_2_supp_3145143_nzpkmp.xlsx]

## Sheet: CHIA-PET enhancer-prom assoc
Supplementary table 6. ChIA-PET associations between differentially expressed enhancerRNAs (eRNAs) and promoters of annotated genes.
enhancer	Gene name	promoter	dpi_id	Annotation type	Log2FC Cancer vs Normal	DE summary	gene type	description	Gene info	chiaPET_tag	tags	chiaPET_experiment
chr6:27759985-27760333	PRSS16	p2@PRSS16	chr6:27218970..27219009,+	transcript	3.901	Solid_UP	protein_coding	protease, serine, 16 (thymus)		chr6:27218912..27219556-chr6:27759579..27760443,2	2	K562CtcfRep1
chr2:208472249-208472458	METTL21A	p4@METTL21A	chr2:208490110..208490129,-	transcript	2.599	Solid_UP	protein_coding	methyltransferase like 21A		chr2:208470719..208472534-chr2:208488387..208491001,2	2	K562Pol2Rep2
chr5:137881069-137881276	EGR1	p3@EGR1	chr5:137804405..137804444,+	3UTR	3.985	Solid_UP	protein_coding	early growth response 1		chr5:137795236..137809916-chr5:137868566..137885450,87	87	K562Pol2Rep2
chr20:50383575-50384083	BMP7	p1@BMP7	chr20:55841662..55841736,-	transcript	4.576	Pan_UP	protein_coding	bone morphogenetic protein 7		chr20:50382729..50385506-chr20:55840141..55841777,2	2	Mcf7Pol2Rep4
chr19:45980345-45980732	RTN2	p3@RTN2	chr19:46000553..46000584,-	transcript	5.429	Pan_UP	protein_coding	reticulon 2		chr19:45977276..45980635-chr19:45998532..46001128,3	3	K562Pol2Rep2
chr1:147080043-147080251	LINC00624	p1@LOC100289211	chr1:146989697..146989701,-	transcript	5.899	Pan_ON	lincRNA	long intergenic non-protein coding RNA 624		chr1:146987976..146990225-chr1:147078811..147080769,2	2	Mcf7Pol2Rep4
chr1:46575103-46575175	PIK3R3	p@chr1:46568472..46568476,-	chr1:46568472..46568476,-	gene	5.731	Pan_ON	protein_coding	phosphoinositide-3-kinase, regulatory subunit 3 (gamma)		chr1:46567386..46569330-chr1:46574210..46576052,2	2	Mcf7Pol2Rep3
chr17:7389589-7389989	TNFSF12	p1@TNFSF12-TNFSF13,p1@TNFSF12	chr17:7452336..7452421,+	transcript	-1.155	Pan_OFF	protein_coding	tumor necrosis factor (ligand) superfamily, member 12		chr17:7386828..7389940-chr17:7450638..7453835,3	3	K562Pol2Rep2
chr12:6717352-6717716	ING4	p1@ING4	chr12:6772268..6772297,-	transcript	0.104		protein_coding	inhibitor of growth family, member 4	tumor_suppressor	chr12:6715064..6719222-chr12:6769900..6773973,8	8	K562Pol2Rep2
chr17:7389589-7389989	KCTD11	p1@KCTD11	chr17:7255461..7255518,+	transcript	-1.239		protein_coding	potassium channel tetramerization domain containing 11	tumor_suppressor	chr17:7251698..7260669-chr17:7384880..7390100,31	31	Mcf7Pol2Rep4
chr2:208472249-208472458	CREB1	p@chr2:208394963..208394984,+	chr2:208394963..208394984,+	transcript	1.821		protein_coding	cAMP responsive element binding protein 1	oncogene , cancer gene census , High Confidence Driver	chr2:208393852..208396484-chr2:208472164..208475529,4	4	K562Pol2Rep1
chr12:92517978-92518398	BTG1	p1@BTG1	chr12:92539614..92539630,-	transcript	0.299		protein_coding	B-cell translocation gene 1, anti-proliferative	oncogene , cancer gene census	chr12:92517195..92518865-chr12:92538192..92540028,2	2	Mcf7Pol2Rep3
chr3:196064212-196064579	TFRC	p1@TFRC	chr3:195808952..195808972,-	transcript	0.912		protein_coding	transferrin receptor	oncogene , cancer gene census	chr3:195807059..195809798-chr3:196063350..196066594,3	3	K562Pol2Rep2
chr12:6717352-6717716	ZNF384	p1@ZNF384	chr12:6798410..6798503,-	transcript	-0.06		protein_coding	zinc finger protein 384	oncogene , cancer gene census	chr12:6713286..6718885-chr12:6796357..6800239,11	11	K562Pol2Rep1
chr1:147080043-147080251	BCL9	p2@BCL9	chr1:147071917..147071960,+	transcript	0.305		protein_coding	B-cell CLL/lymphoma 9	oncogene , cancer gene census	chr1:147070460..147074574-chr1:147075698..147080269,5	5	K562Pol2Rep2
chr20:50383575-50384083	SALL4	p1@SALL4	chr20:50418972..50419029,-	transcript	-0.967		protein_coding	spalt-like transcription factor 4	oncogene	chr20:50380355..50388017-chr20:50412896..50420705,31	31	Mcf7Pol2Rep3
chr20:50366772-50367203	SALL4	p1@SALL4	chr20:50418972..50419029,-	transcript	-0.967		protein_coding	spalt-like transcription factor 4	oncogene	chr20:50365590..50372616-chr20:50414588..50419150,9	9	Mcf7Pol2Rep4
chr19:10949257-10949551	CARM1	p1@CARM1	chr19:10982193..10982250,+	transcript	-0.34		protein_coding	coactivator-associated arginine methyltransferase 1	High Confidence Driver	chr19:10944877..10949508-chr19:10978782..10983087,9	9	Mcf7Pol2Rep4
chr17:7389589-7389989	GPS2	p1@GPS2	chr17:7218631..7218711,-	transcript	0.048		protein_coding	G protein pathway suppressor 2	High Confidence Driver	chr17:7217191..7219515-chr17:7386596..7389793,3	3	K562Pol2Rep2
chr3:138582294-138582582	PIK3CB	p1@PIK3CB	chr3:138553702..138553777,-	transcript	0.492		protein_coding	phosphatidylinositol-4,5-bisphosphate 3-kinase, catalytic subunit beta	High Confidence Driver	chr3:138552566..138554608-chr3:138580222..138582858,2	2	Mcf7Pol2Rep4
chr12:122908043-122908483	CLIP1	p15@CLIP1	chr12:122884508..122884523,-	transcript	3.802		protein_coding	CAP-GLY domain containing linker protein 1	High Confidence Driver	chr12:122877588..122886723-chr12:122904086..122910536,22	22	K562Pol2Rep1
chr16:57717053-57717380	KIFC3	p2@KIFC3	chr16:57837129..57837170,-	transcript	0.487		protein_coding	kinesin family member C3	High Confidence Driver	chr16:57716890..57720001-chr16:57836936..57839697,3	3	K562Pol2Rep1
chr17:74440987-74441354	SRSF2	p1@SRSF2	chr17:74733404..74733422,-	transcript	0.522		protein_coding	serine/arginine-rich splicing factor 2	cancer gene census	chr17:74440764..74443313-chr17:74732003..74734427,2	2	Mcf7Pol2Rep4
chr7:23510676-23511223	IGF2BP3	p28@IGF2BP3	chr7:23470916..23470924,-	transcript	-0.543		protein_coding	insulin-like growth factor 2 mRNA binding protein 3	cancer antigen	chr7:23462379..23477516-chr7:23506515..23520302,29	29	K562Pol2Rep2
chr1:89358212-89358439	RP11-76N22.2	p@chr1:89150418..89150432,-	chr1:89150418..89150432,-	transcript	0.916		antisense			chr1:89147593..89151512-chr1:89354101..89358552,7	7	K562Pol2Rep1
chr12:6717352-6717716	PTMS	p@chr12:6876173..6876218,+	chr12:6876173..6876218,+	transcript	0.378		protein_coding	parathymosin		chr12:6716122..6719465-chr12:6874760..6879848,4	4	K562Pol2Rep2
chr12:6717352-6717716	C12orf57	p@chr12:7053678..7053721,+	chr12:7053678..7053721,+	transcript	-0.701		protein_coding	chromosome 12 open reading frame 57		chr12:6716219..6717745-chr12:7052202..7053993,2	2	K562Pol2Rep2
chr12:6717352-6717716	U47924.31	p@chr12:7053778..7053798,-	chr12:7053778..7053798,-	transcript	0.962		antisense			chr12:6716219..6717745-chr12:7052202..7053993,2	2	K562Pol2Rep2
chr16:57717053-57717380	GPR56	p@chr16:57663215..57663235,+	chr16:57663215..57663235,+	transcript	0.708		protein_coding	G protein-coupled receptor 56		chr16:57662173..57663678-chr16:57716443..57718005,2	2	K562Pol2Rep1
chr16:57717053-57717380	USB1	p@chr16:58033455..58033483,+	chr16:58033455..58033483,+	transcript	-3.815		protein_coding	U6 snRNA biogenesis 1		chr16:57716262..57718197-chr16:58032236..58034322,2	2	K562Pol2Rep1
chr17:56706902-56707296	MTMR4	p@chr17:56570101..56570105,-	chr17:56570101..56570105,-	transcript	0		protein_coding	myotubularin related protein 4		chr17:56568803..56571832-chr17:56706395..56709528,4	4	K562Pol2Rep2
chr17:56706902-56707296	RP11-112H10.4	p@chr17:56602809..56602852,+	chr17:56602809..56602852,+	transcript	-2.793		antisense			chr17:56589666..56604777-chr17:56705874..56711225,47	47	Mcf7Pol2Rep3
chr17:56706902-56707296	SEPT4	p@chr17:56616546..56616552,-	chr17:56616546..56616552,-	transcript	0.194		protein_coding	septin 4		chr17:56601173..56616902-chr17:56706745..56710601,27	27	Mcf7Pol2Rep4
chr17:56706902-56707296	VMP1	p@chr17:57915475..57915493,+	chr17:57915475..57915493,+	transcript	0.802		protein_coding	vacuole membrane protein 1		chr17:56706301..56711882-chr17:57913589..57918649,14	14	Mcf7Pol2Rep3
chr17:56706902-56707296	RP11-332H18.4	p@chr17:59476913..59476989,-	chr17:59476913..59476989,-	transcript	1.651		antisense			chr17:56706858..56710627-chr17:59472052..59479583,11	11	Mcf7Pol2Rep4
chr17:7389589-7389989	PHF23	p@chr17:7141547..7141599,-	chr17:7141547..7141599,-	transcript	-0.906		protein_coding	PHD finger protein 23		chr17:7140753..7146402-chr17:7386225..7389995,7	7	K562Pol2Rep1
chr17:7389589-7389989	CLDN7	p@chr17:7167279..7167298,-	chr17:7167279..7167298,-	transcript	1.939		protein_coding	claudin 7		chr17:7162645..7167425-chr17:7386624..7390012,7	7	Mcf7Pol2Rep4
chr17:7389589-7389989	ACAP1	p@chr17:7253271..7253300,+	chr17:7253271..7253300,+	transcript	-1.392		protein_coding	ArfGAP with coiled-coil, ankyrin repeat and PH domains 1		chr17:7248302..7262556-chr17:7385198..7392152,44	44	K562Pol2Rep2
chr17:7389589-7389989	C17orf61-PLSCR3	p@chr17:7306335..7306339,-	chr17:7306335..7306339,-	transcript	1.798		protein_coding			chr17:7300773..7313700-chr17:7380356..7390864,50	50	K562Pol2Rep1
chr17:7389589-7389989	NLGN2	p@chr17:7307942..7307953,+	chr17:7307942..7307953,+	transcript	1.468		protein_coding	neuroligin 2		chr17:7300773..7313700-chr17:7380356..7390864,50	50	K562Pol2Rep1
chr17:7389589-7389989	CHRNB1	p@chr17:7358889..7358904,+	chr17:7358889..7358904,+	transcript	-0.351		protein_coding	cholinergic receptor, nicotinic, beta 1 (muscle)		chr17:7357464..7363727-chr17:7385654..7389891,10	10	Mcf7Pol2Rep3
chr17:7389589-7389989	POLR2A	p@chr17:7401413..7401427,+	chr17:7401413..7401427,+	transcript	0.577		protein_coding	polymerase (RNA) II (DNA directed) polypeptide A, 220kDa		chr17:7389130..7391469-chr17:7400001..7402710,3	3	Mcf7Pol2Rep4
chr17:74440987-74441354	ZACN	p@chr17:74068035..74068061,+	chr17:74068035..74068061,+	transcript	-1		protein_coding	zinc activated ligand-gated ion channel		chr17:74067372..74069967-chr17:74440892..74443699,2	2	Mcf7Pol2Rep4
chr17:74723995-74724371	CYGB	p@chr17:74524635..74524670,-	chr17:74524635..74524670,-	transcript	-3.05		protein_coding	cytoglobin		chr17:74523629..74527294-chr17:74721309..74725783,4	4	K562Pol2Rep1
chr17:74723995-74724371	ST6GALNAC2	p@chr17:74583031..74583040,-	chr17:74583031..74583040,-	transcript	-0.822		protein_coding	ST6 (alpha-N-acetyl-neuraminyl-2,3-beta-galactosyl-1,3)-N-acetylgalactosaminide alpha-2,6-sialyltransferase 2		chr17:74580020..74584128-chr17:74720653..74724882,6	6	Mcf7Pol2Rep3
chr17:7389589-7389989	CD68	p@chr17:7484124..7484142,+	chr17:7484124..7484142,+	transcript	0.519		protein_coding	CD68 molecule		chr17:7385840..7390246-chr17:7484124..7489169,12	12	K562Pol2Rep2
chr17:7389589-7389989	AC113189.5	p@chr17:7486823..7486903,-	chr17:7486823..7486903,-	transcript	-0.807		antisense			chr17:7385840..7390246-chr17:7484124..7489169,12	12	K562Pol2Rep2
chr17:75120383-75120864	SEC14L1	p@chr17:75126150..75126157,+	chr17:75126150..75126157,+	transcript	0.164		protein_coding	SEC14-like 1 (S. cerevisiae)		chr17:75118673..75124481-chr17:75125673..75132886,9	9	Mcf7Pol2Rep4
chr19:10949257-10949551	C19orf38	p@chr19:10947352..10947367,+	chr19:10947352..10947367,+	transcript	0.226		protein_coding	chromosome 19 open reading frame 38		chr19:10945141..10948588-chr19:10949349..10952583,4	4	K562Pol2Rep2
chr19:3562421-3562565	MFSD12	p@chr19:3573783..3573829,-	chr19:3573783..3573829,-	transcript	3.118		protein_coding	major facilitator superfamily domain containing 12		chr19:3561054..3563475-chr19:3572501..3574737,2	2	K562Pol2Rep2
chr19:45980345-45980732	ERCC1	p@chr19:45954015..45954029,-	chr19:45954015..45954029,-	transcript	-0.27		protein_coding	excision repair cross-complementing rodent repair deficiency, complementation group 1 (includes overlapping antisense sequence)		chr19:45952597..45956269-chr19:45979172..45982191,3	3	Mcf7Pol2Rep4
chr19:45980345-45980732	FOSB	p@chr19:45973872..45973883,+	chr19:45973872..45973883,+	transcript	0.517		protein_coding	FBJ murine osteosarcoma viral oncogene homolog B		chr19:45970153..45974967-chr19:45978231..45982901,6	6	Mcf7Pol2Rep4
chr19:47269374-47269772	AP2S1	p@chr19:47342800..47342827,-	chr19:47342800..47342827,-	transcript	-2.802		protein_coding	adaptor-related protein complex 2, sigma 1 subunit		chr19:47267258..47270898-chr19:47341435..47345656,3	3	K562Pol2Rep1
chr19:55917170-55917359	TNNT1	p@chr19:55653263..55653268,-	chr19:55653263..55653268,-	transcript	2.235		protein_coding	troponin T type 1 (skeletal, slow)		chr19:55652852..55656100-chr19:55917252..55920205,3	3	K562Pol2Rep1
chr19:55917170-55917359	TNNI3	p@chr19:55667599..55667638,-	chr19:55667599..55667638,-	transcript	1.241		protein_coding	troponin I type 3 (cardiac)		chr19:55666935..55669845-chr19:55916166..55917712,2	2	K562Pol2Rep1
chr2:10260365-10260994	RP11-320M2.1	p@chr2:10590300..10590316,+	chr2:10590300..10590316,+	transcript	0.546		lincRNA			chr2:10259710..10265084-chr2:10586364..10590442,7	7	Mcf7Pol2Rep3
chr2:208472249-208472458	AC007879.5	p@chr2:208394261..208394280,-	chr2:208394261..208394280,-	transcript	1.301		antisense			chr2:208393852..208396484-chr2:208472164..208475529,4	4	K562Pol2Rep1
chr2:74647656-74647929	INO80B	p@chr2:74682916..74682923,+	chr2:74682916..74682923,+	transcript	-0.693		protein_coding	INO80 complex subunit B		chr2:74647313..74650391-chr2:74680832..74683306,3	3	K562Pol2Rep1
chr6:27759985-27760333	MIR3143	p@chr6:27115620..27115623,+	chr6:27115620..27115623,+	transcript	2.028		other ncRNAs	microRNA 3143		chr6:27112343..27120362-chr6:27757252..27765476,17	17	K562Pol2Rep1
chr17:7389589-7389989	GABARAP	p1@AL050182	chr17:7145106..7145172,-	transcript	-0.671		protein_coding	GABA(A) receptor-associated protein		chr17:7140753..7146402-chr17:7386225..7389995,7	7	K562Pol2Rep1
chr12:6717352-6717716	ATN1	p1@ATN1	chr12:7036941..7036986,+	transcript	-0.033		protein_coding	atrophin 1		chr12:6715796..6718271-chr12:7034425..7037093,2	2	Mcf7Pol2Rep3
chr20:50366772-50367203	ATP9A	p1@ATP9A	chr20:50384864..50384943,-	transcript	0.54		protein_coding	ATPase, class II, type 9A		chr20:50359810..50370749-chr20:50377617..50386633,52	52	Mcf7Pol2Rep3
chr2:74647656-74647929	AUP1	p1@AUP1	chr2:74756798..74756847,-	transcript	-0.034		protein_coding	ancient ubiquitous protein 1		chr2:74647791..74650542-chr2:74755769..74757998,2	2	Mcf7Pol2Rep4
chr12:6717352-6717716	RP5-940J5.9	p1@BC009430	chr12:6647458..6647477,-	transcript	-0.099		antisense			chr12:6640472..6649855-chr12:6714008..6720626,18	18	K562Pol2Rep1
chr17:74723995-74724371	RP11-318A15.2	p1@BC038747	chr17:74668063..74668076,+	transcript	1.819		antisense			chr17:74665227..74670916-chr17:74720355..74724626,7	7	Mcf7Pol2Rep4
chr6:13602068-13602103	RP1-223E5.4	p1@BC064478	chr6:13615398..13615446,-	transcript	0.902		antisense			chr6:13593118..13602779-chr6:13610915..13617941,16	16	K562Pol2Rep1
chr12:104330398-104330552	C12orf73	p1@C12orf73	chr12:104350898..104351001,-	transcript	0.551		protein_coding	chromosome 12 open reading frame 73		chr12:104320418..104331406-chr12:104346801..104355501,25	25	Mcf7Pol2Rep3
chr16:85586399-85586765	C16orf74	p1@C16orf74	chr16:85784634..85784714,-	transcript	-0.932		protein_coding	chromosome 16 open reading frame 74		chr16:85586084..85592426-chr16:85781975..85786715,9	9	Mcf7Pol2Rep4
chr17:56706902-56707296	C17orf47	p1@C17orf47	chr17:56621665..56621692,-	transcript	0		protein_coding	chromosome 17 open reading frame 47		chr17:56621406..56623003-chr17:56706237..56709189,2	2	K562Pol2Rep1
chr17:7389589-7389989	TMEM256-PLSCR3	p1@C17orf61,p1@PLSCR3	chr17:7307407..7307424,-	transcript	-0.532		protein_coding	TMEM256-PLSCR3 readthrough (NMD candidate)		chr17:7300773..7313700-chr17:7380356..7390864,50	50	K562Pol2Rep1
chr20:61506279-61506510	GID8	p1@C20orf11	chr20:61569463..61569510,+	transcript	0.168		protein_coding	GID complex subunit 8		chr20:61504809..61508384-chr20:61568689..61570942,3	3	K562Pol2Rep1
chr7:23348040-23348443	MALSU1	p1@C7orf30	chr7:23338925..23338973,+	transcript	0.108		protein_coding	mitochondrial assembly of ribosomal large subunit 1		chr7:23335470..23340664-chr7:23344139..23352360,11	11	Mcf7Pol2Rep4
chr1:89358212-89358439	CCBL2	p1@CCBL2	chr1:89458299..89458321,-	transcript	-0.015		protein_coding	cysteine conjugate-beta lyase 2		chr1:89355702..89358517-chr1:89456799..89460790,4	4	K562Pol2Rep1
chr19:45980345-45980732	CD3EAP	p1@CD3EAP	chr19:45909893..45909918,+	transcript	0.269		protein_coding	CD3e molecule, epsilon associated protein		chr19:45905334..45911435-chr19:45979859..45983698,13	13	K562Pol2Rep2
chr17:7389589-7389989	RP1-4G17.5	p1@CLDN7	chr17:7165787..7165807,-	transcript	-4.337		protein_coding			chr17:7162645..7167425-chr17:7386624..7390012,7	7	Mcf7Pol2Rep4
chr5:154062607-154063000	CNOT8	p1@CNOT8	chr5:154238149..154238267,+	transcript	0.292		protein_coding	CCR4-NOT transcription complex, subunit 8		chr5:154061792..154064615-chr5:154236472..154239583,3	3	Mcf7Pol2Rep3
chr12:6717352-6717716	COPS7A	p1@COPS7A	chr12:6833260..6833322,+	transcript	-0.596		protein_coding	COP9 signalosome subunit 7A		chr12:6716907..6718856-chr12:6832444..6833966,2	2	K562Pol2Rep1
chr20:50383575-50384083	MOCS3	p1@CU677523	chr20:49575402..49575414,+	transcript	1.341		protein_coding	molybdenum cofactor synthesis 3		chr20:49574286..49576349-chr20:50382624..50385235,2	2	Mcf7Pol2Rep3
chr2:10260365-10260994	CYS1	p1@CYS1	chr2:10220314..10220373,-	transcript	1.483		protein_coding	cystin 1		chr2:10217388..10221351-chr2:10260365..10264430,6	6	K562Pol2Rep2
chr3:138582294-138582582	DBR1	p1@DBR1	chr3:137893721..137893795,-	transcript	0.258		protein_coding	debranching RNA lariats 1		chr3:137891312..137893819-chr3:138582385..138585243,2	2	K562Pol2Rep1
chr10:70735854-70735920	DDX21	p1@DDX21	chr10:70715914..70715943,+	transcript	1.146		protein_coding	DEAD (Asp-Glu-Ala-Asp) box helicase 21		chr10:70714477..70717663-chr10:70731024..70736582,4	4	Mcf7Pol2Rep3
chr20:61506279-61506510	DIDO1	p1@DIDO1	chr20:61557821..61557881,-	transcript	0.493		protein_coding	death inducer-obliterator 1		chr20:61504489..61508047-chr20:61556996..61558758,4	4	K562Pol2Rep1
chr6:3254273-3254642	LINC01011	p1@DKFZP686I15217	chr6:2988955..2988975,+	transcript	0.592		lincRNA	long intergenic non-protein coding RNA 1011		chr6:2987226..2990466-chr6:3254323..3257830,3	3	K562Pol2Rep2
chr20:50383575-50384083	DPM1	p1@DPM1	chr20:49575059..49575077,-	transcript	0.776		protein_coding	dolichyl-phosphate mannosyltransferase polypeptide 1, catalytic subunit		chr20:49574286..49576349-chr20:50382624..50385235,2	2	Mcf7Pol2Rep3
chr17:7389589-7389989	EIF4A1	p1@EIF4A1	chr17:7476136..7476151,+	transcript	0.341		protein_coding	eukaryotic translation initiation factor 4A1		chr17:7386554..7389940-chr17:7472940..7478722,17	17	Mcf7Pol2Rep4
chr14:103577206-103577606	EIF5	p1@EIF5	chr14:103800513..103800583,+	transcript	0.315		protein_coding	eukaryotic translation initiation factor 5		chr14:103569018..103578571-chr14:103798754..103801911,15	15	Mcf7Pol2Rep4
chr17:7389589-7389989	EIF5A	p1@EIF5A	chr17:7210921..7210983,+	transcript	-0.569		protein_coding	eukaryotic translation initiation factor 5A		chr17:7208846..7215462-chr17:7385031..7390861,12	12	K562Pol2Rep2
chr20:50383575-50384083	RP5-827A12.2	p1@ENST00000400354	chr20:50351023..50351025,+	transcript	-0.823		pseudogene			chr20:50347558..50355785-chr20:50377132..50387572,25	25	Mcf7Pol2Rep3
chr17:56706902-56707296	AC099850.1	p1@ENST00000451775,p1@uc002ixb.2	chr17:57184321..57184338,+	transcript	1.137		antisense			chr17:56706387..56711193-chr17:57182654..57188385,13	13	Mcf7Pol2Rep4
chr4:41936193-41936441	LINC00682	p1@ENST00000499082	chr4:41884582..41884593,-	transcript	2.111		lincRNA	long intergenic non-protein coding RNA 682		chr4:41881632..41884589-chr4:41935920..41938520,2	2	Mcf7Pol2Rep4
chr12:92517978-92518398	RP11-796E2.4	p1@ENST00000499685	chr12:92539926..92539990,+	transcript	1.014		antisense			chr12:92517195..92518865-chr12:92538192..92540028,2	2	Mcf7Pol2Rep3
chr12:79817704-79817772	RP11-84G21.1	p1@ENST00000552885	chr12:80329019..80329075,+	transcript	-1.476		antisense			chr12:79817195..79819395-chr12:80327279..80330121,2	2	Mcf7Pol2Rep4
chr12:112341708-112342051	ERP29	p1@ERP29	chr12:112451222..112451264,+	transcript	-0.302		protein_coding	endoplasmic reticulum protein 29		chr12:112340460..112342992-chr12:112449578..112452486,2	2	K562Pol2Rep2
chr5:137881069-137881276	FAM53C	p1@FAM53C	chr5:137673945..137673961,+	transcript	0.641		protein_coding	family with sequence similarity 53, member C		chr5:137672667..137674782-chr5:137879296..137881614,3	3	K562Pol2Rep2
chr19:55917170-55917359	FAM71E2	p1@FAM71E2	chr19:55874611..55874633,-	transcript	0.628		protein_coding	family with sequence similarity 71, member E2		chr19:55874602..55877064-chr19:55916927..55920725,3	3	K562Pol2Rep1
chr17:7389589-7389989	FGF11	p1@FGF11	chr17:7341586..7341635,+	transcript	-3.092		protein_coding	fibroblast growth factor 11		chr17:7337570..7354119-chr17:7379116..7391211,69	69	Mcf7Pol2Rep4
chr17:7389589-7389989	FXR2	p1@FXR2	chr17:7518145..7518234,-	transcript	-0.491		protein_coding	fragile X mental retardation, autosomal homolog 2		chr17:7386630..7389847-chr17:7517087..7520109,4	4	K562Pol2Rep1
chr12:6717352-6717716	GAPDH	p1@GAPDH	chr12:6643676..6643693,+	transcript	-0.063		protein_coding	glyceraldehyde-3-phosphate dehydrogenase		chr12:6640472..6649855-chr12:6714008..6720626,18	18	K562Pol2Rep1
chr6:27759985-27760333	HIST1H2BJ	p1@HIST1H2BJ	chr6:27100565..27100582,-	transcript	0.541		protein_coding	histone cluster 1, H2bj		chr6:27100058..27102201-chr6:27759619..27761680,3	3	K562Pol2Rep1
chr6:27759985-27760333	HIST1H2BK	p1@HIST1H2BK	chr6:27114620..27114642,-	transcript	0.227		protein_coding	histone cluster 1, H2bk		chr6:27112343..27120362-chr6:27757252..27765476,17	17	K562Pol2Rep1
chr19:3562421-3562565	HMG20B	p1@HMG20B	chr19:3572925..3573014,+	transcript	-0.159		protein_coding	high mobility group 20B		chr19:3561054..3563475-chr19:3572501..3574737,2	2	K562Pol2Rep2
chr2:10260365-10260994	HPCAL1	p1@HPCAL1	chr2:10442993..10443051,+	transcript	0.053		protein_coding	hippocalcin-like 1		chr2:10259183..10262149-chr2:10441411..10444855,4	4	Mcf7Pol2Rep4
chr2:10274411-10274722	HPCAL1	p1@HPCAL1	chr2:10442993..10443051,+	transcript	0.053		protein_coding	hippocalcin-like 1		chr2:10272972..10275013-chr2:10442640..10445673,3	3	K562Pol2Rep2
chr19:55917170-55917359	HSPBP1	p1@HSPBP1	chr19:55791431..55791508,-	transcript	-0.005		protein_coding	HSPA (heat shock 70kDa) binding protein, cytoplasmic cochaperone 1		chr19:55790480..55793295-chr19:55915028..55917425,3	3	K562Pol2Rep2
chr2:74647656-74647929	HTRA2	p1@HTRA2	chr2:74757050..74757143,+	transcript	-0.394		protein_coding	HtrA serine peptidase 2		chr2:74647791..74650542-chr2:74755769..74757998,2	2	Mcf7Pol2Rep4
chr7:1560213-1560697	INTS1	p1@INTS1	chr7:1543981..1544033,-	transcript	0.004		protein_coding	integrator complex subunit 1		chr7:1542587..1549175-chr7:1558772..1562224,8	8	Mcf7Pol2Rep3
chr17:56706902-56707296	INTS2	p1@INTS2	chr17:60005329..60005357,-	transcript	1.022		protein_coding	integrator complex subunit 2		chr17:56706908..56709348-chr17:60003487..60005418,2	2	Mcf7Pol2Rep4
chr19:55917170-55917359	ISOC2	p1@ISOC2	chr19:55972964..55973035,-	transcript	-0.076		protein_coding	isochorismatase domain containing 2		chr19:55916982..55920956-chr19:55971330..55975217,7	7	K562Pol2Rep2
chr16:57717053-57717380	KATNB1	p1@KATNB1	chr16:57769635..57769702,+	transcript	-0.327		protein_coding	katanin p80 (WD repeat containing) subunit B 1		chr16:57715021..57719820-chr16:57766763..57772362,6	6	K562Pol2Rep1
chr2:10260365-10260994	KLF11	p1@KLF11	chr2:10183651..10183713,+	transcript	0.419		protein_coding	Kruppel-like factor 11		chr2:10181485..10190041-chr2:10258160..10265104,19	19	K562Pol2Rep2
chr12:122908043-122908483	KNTC1	p1@KNTC1	chr12:123011776..123011814,+	transcript	1.564		protein_coding	kinetochore associated 1		chr12:122906748..122909467-chr12:123010139..123012944,2	2	K562Pol2Rep2
chr12:53284889-53285178	KRT18	p1@KRT18	chr12:53342893..53342911,+	transcript	0.639		protein_coding	keratin 18		chr12:53271591..53328828-chr12:53332312..53379578,1232	1232	Mcf7Pol2Rep3
chr5:154062607-154063000	LARP1	p1@LARP1	chr5:154134849..154134948,+	transcript	0.055		protein_coding	La ribonucleoprotein domain family, member 1		chr5:154061087..154064928-chr5:154133720..154137511,10	10	Mcf7Pol2Rep3
chr19:55917170-55917359	LENG9	p1@LENG9	chr19:54974947..54974971,-	transcript	-0.453		protein_coding	leukocyte receptor cluster (LRC) member 9		chr19:54974126..54976870-chr19:55916599..55919273,2	2	K562Pol2Rep1
chr12:6717352-6717716	LEPREL2	p1@LEPREL2	chr12:6937564..6937585,+	transcript	-0.842		other ncRNAs	leprecan-like 2		chr12:6715153..6717722-chr12:6934151..6937757,3	3	K562Pol2Rep1
chr19:45980345-45980732	AC006132.1	p1@LOC100287177	chr19:46144884..46144917,+	transcript	0.524		protein_coding			chr19:45978034..45981849-chr19:46143771..46146497,3	3	K562Pol2Rep1
chr12:122908043-122908483	RP11-450K4.1	p1@LOC100507066	chr12:122880045..122880093,+	transcript	0.664		lincRNA			chr12:122878851..122886809-chr12:122904517..122908613,16	16	Mcf7Pol2Rep4
chr12:6717352-6717716	LPAR5	p1@LPAR5	chr12:6745101..6745141,-	transcript	-0.063		protein_coding	lysophosphatidic acid receptor 5		chr12:6716376..6719249-chr12:6742390..6745362,2	2	Mcf7Pol2Rep4
chr2:10260365-10260994	LPIN1	p1@LPIN1	chr2:11886710..11886776,+	transcript	-0.171		protein_coding	lipin 1		chr2:10259345..10261058-chr2:11886635..11888299,2	2	K562Pol2Rep1
chr1:89358212-89358439	LRRC8B	p1@LRRC8B	chr1:89990431..89990493,+	transcript	0.943		protein_coding	leucine rich repeat containing 8 family, member B		chr1:89356518..89358622-chr1:89988526..89991388,3	3	K562Pol2Rep2
chr5:138620359-138620541	MATR3	p1@MATR3	chr5:138629417..138629446,+	transcript	0.671		protein_coding	matrin 3		chr5:138618305..138620932-chr5:138627654..138630272,2	2	Mcf7Pol2Rep3
chr17:74440987-74441354	MFSD11	p1@MFSD11	chr17:74734052..74734157,+	transcript	-0.539		protein_coding	major facilitator superfamily domain containing 11		chr17:74440764..74443313-chr17:74732003..74734427,2	2	Mcf7Pol2Rep4
chr17:56706902-56707296	MIR21	p1@MIR21	chr17:57918463..57918513,+	transcript	2.503		other ncRNAs	microRNA 21		chr17:56706878..56712481-chr17:57917877..57926954,31	31	Mcf7Pol2Rep4
chr12:6717352-6717716	MLF2	p1@MLF2	chr12:6862249..6862298,-	transcript	-0.785		protein_coding	myeloid leukemia factor 2		chr12:6717102..6718715-chr12:6862030..6863936,2	2	K562Pol2Rep2
chr2:74647656-74647929	MOGS	p1@MOGS	chr2:74692473..74692542,-	transcript	-0.386		protein_coding	mannosyl-oligosaccharide glucosidase		chr2:74640013..74659865-chr2:74680643..74694002,53	53	Mcf7Pol2Rep3
chr17:7389589-7389989	MPDU1	p1@MPDU1	chr17:7487160..7487181,+	transcript	-0.471		protein_coding	mannose-P-dolichol utilization defect 1		chr17:7385840..7390246-chr17:7484124..7489169,12	12	K562Pol2Rep2
chr12:6717352-6717716	MRPL51	p1@MRPL51	chr12:6602406..6602440,-	transcript	0.097		protein_coding	mitochondrial ribosomal protein L51		chr12:6600667..6602781-chr12:6716552..6719273,2	2	Mcf7Pol2Rep4
chr17:7389589-7389989	NEURL4	p1@NEURL4	chr17:7232630..7232688,-	transcript	-0.067		protein_coding	neuralized E3 ubiquitin protein ligase 4		chr17:7230533..7234895-chr17:7385200..7390274,10	10	K562Pol2Rep1
chr6:13602068-13602103	NOL7	p1@NOL7	chr6:13615554..13615601,+	transcript	0.655		protein_coding	nucleolar protein 7, 27kDa		chr6:13593118..13602779-chr6:13610915..13617941,16	16	K562Pol2Rep1
chr12:6717352-6717716	NOP2	p1@NOP2	chr12:6677422..6677495,-	transcript	0.311		protein_coding	NOP2 nucleolar protein		chr12:6676992..6678766-chr12:6714994..6718746,4	4	K562Pol2Rep2
chr12:104330398-104330552	NT5DC3	p1@NT5DC3	chr12:104234989..104235022,-	transcript	0.296		protein_coding	5'-nucleotidase domain containing 3		chr12:104233850..104236923-chr12:104328955..104330826,3	3	K562Pol2Rep1
chr2:10260365-10260994	ODC1	p1@ODC1	chr2:10588445..10588461,-	transcript	0.542		protein_coding	ornithine decarboxylase 1		chr2:10257984..10265070-chr2:10582045..10589780,17	17	K562Pol2Rep1
chr19:45980345-45980732	OPA3	p1@OPA3	chr19:46088027..46088067,-	transcript	-0.493		protein_coding	optic atrophy 3 (autosomal recessive, with chorea and spastic paraplegia)		chr19:45980191..45982839-chr19:46087153..46088852,2	2	K562Pol2Rep2
chr12:79817704-79817772	PAWR	p1@PAWR	chr12:80084303..80084332,-	transcript	0.182		protein_coding	PRKC, apoptosis, WT1, regulator		chr12:79812143..79819059-chr12:80083186..80087206,9	9	Mcf7Pol2Rep4
chr3:196064212-196064579	PCYT1A	p1@PCYT1A	chr3:196014520..196014629,-	transcript	-0.227		protein_coding	phosphate cytidylyltransferase 1, choline, alpha		chr3:196014212..196016306-chr3:196062015..196064940,3	3	Mcf7Pol2Rep3
chr1:89358212-89358439	PKN2	p1@PKN2	chr1:89149914..89149995,+	transcript	0.923		protein_coding	protein kinase N2		chr1:89147593..89151512-chr1:89354101..89358552,7	7	K562Pol2Rep1
chr17:56706902-56707296	PPM1D	p1@PPM1D	chr17:58677539..58677610,+	transcript	0.557		protein_coding	protein phosphatase, Mg2+/Mn2+ dependent, 1D		chr17:56706751..56710573-chr17:58675801..58680081,6	6	Mcf7Pol2Rep4
chr17:56706902-56707296	PPM1E	p1@PPM1E	chr17:56833184..56833249,+	transcript	1.672		protein_coding	protein phosphatase, Mg2+/Mn2+ dependent, 1E		chr17:56705383..56710816-chr17:56831569..56838348,19	19	Mcf7Pol2Rep4
chr19:45980345-45980732	PPM1N	p1@PPM1N	chr19:46000479..46000502,+	transcript	3.294		protein_coding	protein phosphatase, Mg2+/Mn2+ dependent, 1N (putative)		chr19:45977276..45980635-chr19:45998532..46001128,3	3	K562Pol2Rep2
chr12:79817704-79817772	PPP1R12A	p1@PPP1R12A	chr12:80328850..80328893,-	transcript	0.207		protein_coding	protein phosphatase 1, regulatory subunit 12A		chr12:79817195..79819395-chr12:80327279..80330121,2	2	Mcf7Pol2Rep4
chr19:45980345-45980732	PPP1R13L	p1@PPP1R13L	chr19:45908292..45908374,-	transcript	-1.391		protein_coding	protein phosphatase 1, regulatory subunit 13 like		chr19:45904958..45910516-chr19:45979817..45983909,10	10	K562Pol2Rep1
chr17:74440987-74441354	PRPSAP1	p1@PRPSAP1	chr17:74349932..74350017,-	transcript	0.325		protein_coding	phosphoribosyl pyrophosphate synthetase-associated protein 1		chr17:74347908..74350011-chr17:74440646..74443450,2	2	K562Pol2Rep2
chr6:151730569-151730753	RMND1	p1@RMND1	chr6:151773232..151773298,-	transcript	0.145		protein_coding	required for meiotic nuclear division 1 homolog (S. cerevisiae)		chr6:151728578..151730764-chr6:151772082..151773625,2	2	K562Pol2Rep2
chr3:196064212-196064579	RNF168	p1@RNF168	chr3:196230590..196230677,-	transcript	0.432		protein_coding	ring finger protein 168, E3 ubiquitin protein ligase		chr3:196062616..196065996-chr3:196228027..196230994,3	3	K562Pol2Rep1
chr12:6717352-6717716	RPL13P5	p1@RPL13P5,p2@LRRC23	chr12:6982778..6982862,+	transcript	0.998		pseudogene	ribosomal protein L13 pseudogene 5		chr12:6716481..6719002-chr12:6980525..6983461,2	2	K562Pol2Rep2
chr12:122908043-122908483	RSRC2	p1@RSRC2	chr12:123011476..123011527,-	transcript	0.863		protein_coding	arginine/serine-rich coiled-coil 2		chr12:122906748..122909467-chr12:123010139..123012944,2	2	K562Pol2Rep2
chr2:74647656-74647929	RTKN	p1@RTKN	chr2:74669009..74669077,-	transcript	-1.53		protein_coding	rhotekin		chr2:74647601..74649410-chr2:74667169..74669984,2	2	K562Pol2Rep2
chr17:7389589-7389989	SENP3	p1@SENP3	chr17:7465216..7465274,+	transcript	-0.478		protein_coding	SUMO1/sentrin/SMT3 specific peptidase 3		chr17:7384859..7390741-chr17:7462566..7467629,19	19	K562Pol2Rep1
chr19:55917170-55917359	SHISA7	p1@SHISA7	chr19:55954631..55954676,-	transcript	1.114		protein_coding	shisa family member 7		chr19:55917160..55921382-chr19:55952217..55958073,12	12	K562Pol2Rep1
chr5:138620359-138620541	SIL1	p1@SIL1	chr5:138533973..138534006,-	transcript	-0.435		protein_coding	SIL1 nucleotide exchange factor		chr5:138533827..138535972-chr5:138619685..138623298,3	3	K562Pol2Rep1
chr6:13602068-13602103	SIRT5	p1@SIRT5	chr6:13574810..13574838,+	transcript	0.002		protein_coding	sirtuin 5		chr6:13571528..13575473-chr6:13600705..13603709,4	4	K562Pol2Rep1
chr19:47269374-47269772	SLC1A5	p1@SLC1A5	chr19:47291843..47291859,-	transcript	0.734		protein_coding	solute carrier family 1 (neutral amino acid transporter), member 5		chr19:47268174..47271975-chr19:47288719..47292861,4	4	Mcf7Pol2Rep3
chr17:7389589-7389989	SLC2A4	p1@SLC2A4	chr17:7185030..7185076,+	transcript	2.006		protein_coding	solute carrier family 2 (facilitated glucose transporter), member 4		chr17:7183597..7185417-chr17:7387674..7389868,3	3	Mcf7Pol2Rep4
chr4:41936193-41936441	SLC30A9	p1@SLC30A9	chr4:41992513..41992561,+	transcript	0.215		protein_coding	solute carrier family 30 (zinc transporter), member 9		chr4:41935122..41937174-chr4:41992334..41994064,2	2	K562Pol2Rep1
chr17:74723995-74724371	SNORD1B	p1@SNORD1B	chr17:74557133..74557167,+	transcript	0.674		other ncRNAs	small nucleolar RNA, C/D box 1B		chr17:74555797..74557759-chr17:74722152..74724486,2	2	Mcf7Pol2Rep3
chr17:74723995-74724371	SNHG16	p1@SNORD1C	chr17:74553841..74553864,+	transcript	0.435		other ncRNAs	small nucleolar RNA host gene 16 (non-protein coding)		chr17:74552615..74556383-chr17:74720653..74725510,6	6	K562Pol2Rep2
chr12:6717352-6717716	SPSB2	p1@SPSB2	chr12:6982442..6982478,-	transcript	-0.087		protein_coding	splA/ryanodine receptor domain and SOCS box containing 2		chr12:6716481..6719002-chr12:6980525..6983461,2	2	K562Pol2Rep2
chr17:74440987-74441354	SRP68	p1@SRP68	chr17:74068567..74068608,-	transcript	0.616		protein_coding	signal recognition particle 68kDa		chr17:74067372..74069967-chr17:74440892..74443699,2	2	Mcf7Pol2Rep4
chr19:55917170-55917359	SSC5D	p1@SSC5D	chr19:55999783..55999842,+	transcript	0.492		protein_coding	scavenger receptor cysteine rich domain containing (5 domains)		chr19:55915902..55921022-chr19:55996597..56001074,7	7	K562Pol2Rep1
chr20:43540233-43540373	STK4	p1@STK4	chr20:43595119..43595220,+	transcript	0.665		protein_coding	serine/threonine kinase 4		chr20:43537128..43540466-chr20:43593300..43597005,4	4	Mcf7Pol2Rep4
chr19:47269374-47269772	STRN4	p1@STRN4	chr19:47249679..47249725,-	transcript	-0.133		protein_coding	striatin, calmodulin binding protein 4		chr19:47249484..47251109-chr19:47268723..47270830,2	2	K562Pol2Rep2
chr20:50383575-50384083	SUMO1P1	p1@SUMO1P1	chr20:52492199..52492233,-	transcript	0.198		pseudogene	SUMO1 pseudogene 1		chr20:50382823..50385492-chr20:52491964..52494006,2	2	Mcf7Pol2Rep3
chr19:55917170-55917359	SUV420H2	p1@SUV420H2	chr19:55851236..55851285,+	transcript	0.59		protein_coding	suppressor of variegation 4-20 homolog 2 (Drosophila)		chr19:55850926..55852723-chr19:55915880..55917552,2	2	K562Pol2Rep2
chr2:10260365-10260994	TAF1B	p1@TAF1B	chr2:9983555..9983641,+	transcript	0.679		protein_coding	TATA box binding protein (TBP)-associated factor, RNA polymerase I, B, 63kDa		chr2:9983297..9984997-chr2:10260468..10262228,2	2	K562Pol2Rep1
chr17:56706902-56707296	TBX2	p1@TBX2	chr17:59477233..59477263,+	transcript	0.713		protein_coding	T-box 2		chr17:56706858..56710627-chr17:59472052..59479583,11	11	Mcf7Pol2Rep4
chr20:61506279-61506510	TCFL5	p1@TCFL5	chr20:61493117..61493187,-	transcript	0.368		protein_coding	transcription factor-like 5 (basic helix-loop-helix)		chr20:61491819..61494978-chr20:61504574..61508159,4	4	K562Pol2Rep1
chr3:196064212-196064579	RP11-447L10.1	p1@TCTEX1D2	chr3:196045042..196045121,-	transcript	0.426		protein_coding			chr3:196043015..196046706-chr3:196061951..196066451,7	7	K562Pol2Rep1
chr12:104330398-104330552	TDG	p1@TDG	chr12:104359641..104359689,+	transcript	0.938		protein_coding	thymine-DNA glycosylase		chr12:104328917..104332179-chr12:104357230..104361045,4	4	Mcf7Pol2Rep3
chr3:156229646-156229758	TIPARP	p1@TIPARP	chr3:156392391..156392409,+	transcript	-0.031		protein_coding	TCDD-inducible poly(ADP-ribose) polymerase		chr3:156227911..156230304-chr3:156391869..156395073,3	3	K562Pol2Rep2
chr3:156229646-156229758	TIPARP-AS1	p1@TIPARP-AS1	chr3:156392156..156392176,-	transcript	1.03		antisense	TIPARP antisense RNA 1		chr3:156227911..156230304-chr3:156391869..156395073,3	3	K562Pol2Rep2
chr19:10949257-10949551	TMED1	p1@TMED1	chr19:10946872..10946894,-	transcript	-0.713		protein_coding	transmembrane emp24 protein transport domain containing 1		chr19:10945141..10948588-chr19:10949349..10952583,4	4	K562Pol2Rep2
chr17:7389589-7389989	TMEM102	p1@TMEM102	chr17:7338737..7338813,+	transcript	-1.265		protein_coding	transmembrane protein 102		chr17:7337174..7351815-chr17:7378192..7393446,58	58	Mcf7Pol2Rep3
chr12:112341708-112342051	TMEM116	p1@TMEM116	chr12:112450928..112450976,-	transcript	0.69		protein_coding	transmembrane protein 116		chr12:112340460..112342992-chr12:112449578..112452486,2	2	K562Pol2Rep2
chr8:125367728-125368050	TMEM65	p1@TMEM65	chr8:125384927..125384952,-	transcript	0.513		protein_coding	transmembrane protein 65		chr8:125366683..125371007-chr8:125384186..125388697,5	5	K562Pol2Rep1
chr17:7389589-7389989	TMEM95	p1@TMEM95	chr17:7258470..7258485,+	transcript	0		protein_coding	transmembrane protein 95		chr17:7249602..7260777-chr17:7385198..7392152,40	40	K562Pol2Rep1
chr14:103577206-103577606	TNFAIP2	p1@TNFAIP2	chr14:103589789..103589804,+	transcript	2.234		protein_coding	tumor necrosis factor, alpha-induced protein 2		chr14:103576980..103578975-chr14:103586867..103590723,3	3	Mcf7Pol2Rep4
chr17:7389589-7389989	TNFSF13	p1@TNFSF13	chr17:7462297..7462342,+	transcript	-2.954		protein_coding	tumor necrosis factor (ligand) superfamily, member 13		chr17:7385277..7391019-chr17:7459967..7466292,13	13	Mcf7Pol2Rep4
chr20:43540233-43540373	TOMM34	p1@TOMM34	chr20:43588989..43589095,-	transcript	0.17		protein_coding	translocase of outer mitochondrial membrane 34		chr20:43538749..43542335-chr20:43587453..43590111,6	6	Mcf7Pol2Rep4
chr12:6717352-6717716	TPI1	p1@TPI1	chr12:6976687..6976696,+	transcript	-0.566		protein_coding	triosephosphate isomerase 1		chr12:6716723..6718282-chr12:6975300..6978143,2	2	K562Pol2Rep1
chr7:23510676-23511223	TRA2A	p1@TRA2A	chr7:23571586..23571610,-	transcript	0.661		protein_coding	transformer 2 alpha homolog (Drosophila)		chr7:23505282..23522898-chr7:23561188..23573318,65	65	K562Pol2Rep1
chr17:56706902-56707296	TRIM37	p1@TRIM37	chr17:57184170..57184257,-	transcript	0.732		protein_coding	tripartite motif containing 37		chr17:56706897..56710474-chr17:57182041..57185772,3	3	K562Pol2Rep1
chr7:23510676-23511223	TRIM4	p1@TRIM4	chr7:99517131..99517162,-	transcript	-0.015		protein_coding	tripartite motif containing 4		chr7:23510680..23511466-chr7:99516800..99517757,2	2	Helas3Pol2Rep1
chr6:3254273-3254642	TUBB2A	p1@TUBB2A	chr6:3157770..3157784,-	transcript	-0.798		protein_coding	tubulin, beta 2A class IIa		chr6:3155580..3164406-chr6:3250257..3261632,36	36	K562Pol2Rep1
chr17:74440987-74441354	UBE2O	p1@UBE2O	chr17:74449224..74449249,-	transcript	0.524		protein_coding	ubiquitin-conjugating enzyme E2O		chr17:74439893..74442810-chr17:74447883..74449533,3	3	Mcf7Pol2Rep4
chr3:196064212-196064579	UBXN7	p1@UBXN7	chr3:196159289..196159323,-	transcript	0.76		protein_coding	UBX domain protein 7		chr3:196062836..196066201-chr3:196157853..196162484,6	6	K562Pol2Rep1
chr3:196064212-196064579	UBXN7-AS1	p1@uc003fwo.1	chr3:196158215..196158241,+	transcript	0.934		antisense	UBXN7 antisense RNA 1		chr3:196062836..196066201-chr3:196157853..196162484,6	6	K562Pol2Rep1
chr12:6717352-6717716	USP5	p1@USP5	chr12:6961279..6961343,+	transcript	-0.547		protein_coding	ubiquitin specific peptidase 5 (isopeptidase T)		chr12:6717100..6718735-chr12:6960476..6962770,2	2	Mcf7Pol2Rep3
chr2:74647656-74647929	WBP1	p1@WBP1	chr2:74685556..74685585,+	transcript	-0.382		protein_coding	WW domain binding protein 1		chr2:74640013..74659865-chr2:74680643..74694002,53	53	Mcf7Pol2Rep3
chr17:25416172-25416581	WSB1	p1@WSB1	chr17:25621129..25621146,+	transcript	-0.016		protein_coding	WD repeat and SOCS box containing 1		chr17:25415386..25417022-chr17:25619453..25621381,2	2	K562Pol2Rep2
chr20:43540233-43540373	YWHAB	p1@YWHAB	chr20:43514320..43514425,+	transcript	0.036		protein_coding	tyrosine 3-monooxygenase/tryptophan 5-monooxygenase activation protein, beta		chr20:43513290..43517077-chr20:43537579..43541885,9	9	Mcf7Pol2Rep3
chr2:10260365-10260994	YWHAQ	p1@YWHAQ	chr2:9771092..9771153,-	transcript	0.08		protein_coding	tyrosine 3-monooxygenase/tryptophan 5-monooxygenase activation protein, theta		chr2:9769329..9772234-chr2:10259369..10263419,6	6	K562Pol2Rep2
chr12:122908043-122908483	ZCCHC8	p1@ZCCHC8	chr12:122985389..122985423,-	transcript	1.06		protein_coding	zinc finger, CCHC domain containing 8		chr12:122905434..122908389-chr12:122983902..122986310,2	2	K562Pol2Rep1
chr5:178259703-178260206	ZNF354B	p1@ZNF354B	chr5:178286925..178287007,+	transcript	0.928		protein_coding	zinc finger protein 354B		chr5:178258610..178261483-chr5:178285999..178288925,2	2	K562Pol2Rep2
chr7:23510676-23511223	ZNF425	p1@ZNF425	chr7:148823387..148823440,-	transcript	-0.393		protein_coding	zinc finger protein 425		chr7:23510358..23510988-chr7:148823320..148823935,2	2	Helas3Pol2Rep1
chr19:55917170-55917359	ZNF628	p1@ZNF628	chr19:55987963..55987996,+	transcript	-0.199		protein_coding	zinc finger protein 628		chr19:55915645..55917766-chr19:55986394..55988537,3	3	K562Pol2Rep2
chr7:23510676-23511223	GPNMB	p10@GPNMB	chr7:23309737..23309748,+	transcript	-0.504		protein_coding	glycoprotein (transmembrane) nmb		chr7:23306495..23309842-chr7:23508532..23511238,3	3	K562Pol2Rep2
chr20:50383575-50384083	ATP9A	p13@ATP9A	chr20:50349144..50349177,-	transcript	0		protein_coding	ATPase, class II, type 9A		chr20:50347558..50355785-chr20:50377132..50387572,25	25	Mcf7Pol2Rep3
chr19:55917170-55917359	ZNF580	p13@ZNF580,p4@ZNF581	chr19:56146421..56146438,+	transcript	1.001		protein_coding	zinc finger protein 580		chr19:55916987..55920426-chr19:56143247..56147032,3	3	Mcf7Pol2Rep4
chr19:45980345-45980732	EML2	p2@AK024984	chr19:46145523..46145553,-	transcript	0.647		protein_coding	echinoderm microtubule associated protein like 2		chr19:45978034..45981849-chr19:46143771..46146497,3	3	K562Pol2Rep1
chr12:6717352-6717716	CDCA3	p2@CDCA3	chr12:6961050..6961096,-	transcript	0.169		protein_coding	cell division cycle associated 3		chr12:6717100..6718735-chr12:6960476..6962770,2	2	Mcf7Pol2Rep3
chr19:55917170-55917359	EPS8L1	p2@EPS8L1	chr19:55591743..55591780,+	transcript	1.313		protein_coding	EPS8-like 1		chr19:55590507..55594768-chr19:55917232..55920967,4	4	K562Pol2Rep2
chr6:27759985-27760333	HIST1H2AG	p2@HIST1H2AG	chr6:27100811..27100830,+	transcript	0.955		protein_coding	histone cluster 1, H2ag		chr6:27100058..27102201-chr6:27759619..27761680,3	3	K562Pol2Rep1
chr6:27759985-27760333	HIST1H2AH	p2@HIST1H2AH	chr6:27114873..27114896,+	transcript	0.511		protein_coding	histone cluster 1, H2ah		chr6:27114006..27117036-chr6:27757765..27761399,4	4	Mcf7Pol2Rep3
chr12:53284889-53285178	KRT8	p2@KRT8	chr12:53343633..53343696,-	transcript	0.364		protein_coding	keratin 8		chr12:53271591..53328828-chr12:53332312..53379578,1232	1232	Mcf7Pol2Rep3
chr12:6717352-6717716	NCAPD2	p2@NCAPD2	chr12:6602517..6602559,+	transcript	0.353		protein_coding	non-SMC condensin I complex, subunit D2		chr12:6600667..6602781-chr12:6716552..6719273,2	2	Mcf7Pol2Rep4
chr2:74647656-74647929	DCTN1	p3@DCTN1	chr2:74601758..74601831,-	transcript	-4.228		protein_coding	dynactin 1		chr2:74600555..74602821-chr2:74647159..74650149,2	2	Mcf7Pol2Rep3
chr1:228783266-228783899	DUSP5P1	p3@DUSP5P	chr1:228786346..228786350,+	transcript	-0.457		pseudogene	dual specificity phosphatase 5 pseudogene 1		chr1:228782241..228785119-chr1:228785249..228788137,2	2	K562Pol2Rep1
chr12:6717352-6717716	ACRBP	p3@LPAR5	chr12:6748384..6748425,-	transcript	-0.104		protein_coding	acrosin binding protein		chr12:6714153..6717979-chr12:6744560..6748679,4	4	K562Pol2Rep2
chr14:103577206-103577606	LINC00677	p4@ENST00000560742	chr14:103589380..103589397,-	transcript	0.167		lincRNA	long intergenic non-protein coding RNA 677		chr14:103576980..103578975-chr14:103586867..103590723,3	3	Mcf7Pol2Rep4
chr7:23510676-23511223	ZNF398	p4@ZNF398	chr7:148823485..148823510,+	transcript	0.48		protein_coding	zinc finger protein 398		chr7:23510358..23510988-chr7:148823320..148823935,2	2	Helas3Pol2Rep1
chr5:137881069-137881276	CDC25C	p5@CDC25C	chr5:137674000..137674034,-	transcript	1.614		protein_coding	cell division cycle 25C		chr5:137672667..137674782-chr5:137879296..137881614,3	3	K562Pol2Rep2
chr1:70709017-70709466	SRSF11	p7@SRSF11	chr1:70715650..70715683,+	transcript	1.055		protein_coding	serine/arginine-rich splicing factor 11		chr1:70705684..70710754-chr1:70711128..70717552,6	6	K562Pol2Rep2
chr11:2669931-2670236	KCNQ1OT1	p@chr11:2676900..2676903,-	chr11:2676900..2676903,-	exon	3.803		antisense	KCNQ1 opposite strand/antisense transcript 1 (non-protein coding)		chr11:2666797..2671352-chr11:2674912..2679036,4	4	K562Pol2Rep2
chr15:30022522-30022814	TJP1	p@chr15:30010302..30010336,-	chr15:30010302..30010336,-	exon	0.936		protein_coding	tight junction protein 1		chr15:30009467..30011103-chr15:30022203..30024699,2	2	Mcf7Pol2Rep4
chr2:74647656-74647929	C2orf81	p@chr2:74642577..74642652,-	chr2:74642577..74642652,-	exon	-1.035		protein_coding	chromosome 2 open reading frame 81		chr2:74639058..74643763-chr2:74646705..74649350,5	5	Mcf7Pol2Rep3
chr3:196064212-196064579	ZDHHC19	p@chr3:195934370..195934394,-	chr3:195934370..195934394,-	exon	0.85		protein_coding	zinc finger, DHHC-type containing 19		chr3:195933623..195937361-chr3:196062207..196065610,4	4	K562Pol2Rep1
chr7:1560213-1560697	AC102953.6	p@chr7:1548370..1548414,-	chr7:1548370..1548414,-	exon	1.873		antisense			chr7:1542587..1549175-chr7:1558772..1562224,8	8	Mcf7Pol2Rep3
chr1:228783266-228783899	CROCC	p@chr1:17231687..17231704,+	chr1:17231687..17231704,+	gene	2.612		protein_coding	ciliary rootlet coiled-coil, rootletin		chr1:17231506..17232339-chr1:228782832..228783652,2	2	Helas3Pol2Rep1
chr12:6717352-6717716	RP4-761J14.8	p@chr12:6773757..6773767,+	chr12:6773757..6773767,+	gene	-1.358		antisense			chr12:6714955..6718555-chr12:6771082..6774156,5	5	K562Pol2Rep1
chr16:57717053-57717380	GPR114	p@chr16:57625244..57625249,+	chr16:57625244..57625249,+	gene	1.248		protein_coding	G protein-coupled receptor 114		chr16:57625109..57626693-chr16:57715457..57717644,2	2	K562Pol2Rep2
chr17:7389589-7389989	RP11-104H15.7	p@chr17:7332150..7332187,+	chr17:7332150..7332187,+	gene	0		other ncRNAs			chr17:7330553..7353492-chr17:7382820..7392773,86	86	K562Pol2Rep1
chr17:74723995-74724371	UBALD2	p@chr17:74263592..74263596,+	chr17:74263592..74263596,+	gene	1.349		protein_coding	UBA-like domain containing 2		chr17:74263385..74267072-chr17:74721678..74724522,3	3	K562Pol2Rep1
chr17:74723995-74724371	RHBDF2	p@chr17:74480871..74480893,-	chr17:74480871..74480893,-	gene	0.333		protein_coding	rhomboid 5 homolog 2 (Drosophila)		chr17:74479748..74482299-chr17:74723022..74725082,2	2	K562Pol2Rep2
chr19:55917170-55917359	BRSK1	p@chr19:55799307..55799349,+	chr19:55799307..55799349,+	gene	0.698		protein_coding	BR serine/threonine kinase 1		chr19:55798117..55803802-chr19:55916082..55920266,5	5	Mcf7Pol2Rep4
chr2:102383406-102383725	MAP4K4	p@chr2:102371822..102371854,+	chr2:102371822..102371854,+	gene	2.832		protein_coding	mitogen-activated protein kinase kinase kinase kinase 4		chr2:102371359..102373880-chr2:102382478..102385434,3	3	K562Pol2Rep2
chr3:196064212-196064579	TM4SF19	p@chr3:196046974..196046977,-	chr3:196046974..196046977,-	gene	3.461		protein_coding	transmembrane 4 L six family member 19		chr3:196043015..196047197-chr3:196061951..196068288,11	11	K562Pol2Rep2
chr5:137881069-137881276	ETF1	p@chr5:137871560..137871563,-	chr5:137871560..137871563,-	gene	3.651		protein_coding	eukaryotic translation termination factor 1		chr5:137871359..137874427-chr5:137881170..137883964,3	3	Mcf7Pol2Rep3
chr17:56701235-56701661	SEPT4	p@chr17:56598639..56598652,-	chr17:56598639..56598652,-	3UTR	0.679		protein_coding	septin 4		chr17:56598257..56600650-chr17:56700024..56702763,2	2	Mcf7Pol2Rep4
