# Supplementary material for: Transcriptome Analysis of Recurrently Deregulated Genes across Multiple Cancers Identifies New Pan-Cancer Biomarkers
Source: Oxford University Press journal article supplement (doi:10.1158/0008-5472.can-15-0484), 2015-11-09
Supplement: 00085472can150484-sup-145596_2_supp_3145144_n7pkmp.xlsx [file 00085472can150484-sup-145596_2_supp_3145144_n7pkmp.xlsx]

## Sheet: FULL table
Supplementary table 7. Genes located within 100kb from the promoters of differentially expressed long non coding RNAs
lncRNA	Log2FC Cancer vs Normal	lncRNA DE summary	lncRNA gene type	lncRNA description	Neighbour gene name	Neighbour Log2FC Cancer vs Normal	Neighbour DE summary	Neighbour gene type	Neighbou gene description	Neighbour gene info	Distance from lncRNA	overlap	Strand
RHPN1-AS1	3.183	Pan_UP	antisense	RHPN1 antisense RNA 1 (head to head)	MAFA	4.647	Solid_UP	protein_coding	v-maf avian musculoaponeurotic fibrosarcoma oncogene homolog A	tumor_suppressor , oncogene	<100kb	no	same
RP11-435O5.2	3.149	Pan_UP	lincRNA		PTCH1	4.656	Pan_ON	protein_coding	patched 1	tumor_suppressor	<100kb	no	same
RNU6-781P	6.09	Pan_UP	other ncRNAs	RNA, U6 small nuclear 781, pseudogene	ING4	0.104		protein_coding	inhibitor of growth family, member 4	tumor_suppressor	<100kb	no	opposite
LIFR-AS1	4.155	Solid_ON	antisense	LIFR antisense RNA 1	LIFR	3.646		protein_coding	leukemia inhibitory factor receptor alpha	oncogene , cancer gene census , High Confidence Driver	<100kb	yes	opposite
AC079767.4	5.874	Pan_ON	lincRNA		CREB1	0.662		protein_coding	cAMP responsive element binding protein 1	oncogene , cancer gene census , High Confidence Driver	<100kb	no	same
LINC00624	5.899	Pan_ON	lincRNA	long intergenic non-protein coding RNA 624	BCL9	2.206	Solid_UP	protein_coding	B-cell CLL/lymphoma 9	oncogene , cancer gene census	<100kb	no	opposite
RP11-475N22.4	3.687	Solid_ON	antisense		GATA2	4.475	Solid_ON	protein_coding	GATA binding protein 2	oncogene , cancer gene census	<1kb	yes	opposite
RP11-460N16.1	6.451	Pan_ON	lincRNA		MITF	2.954		protein_coding	microphthalmia-associated transcription factor	oncogene , cancer gene census	<100kb	no	same
RP11-1070N10.5	5.903	Solid_ON	lincRNA		TCL6	0		other ncRNAs	T-cell leukemia/lymphoma 6 (non-protein coding)	oncogene , cancer gene census	<100kb	no	same
RP11-1070N10.5	5.903	Solid_ON	lincRNA		TCL1A	0.558		protein_coding	T-cell leukemia/lymphoma 1A	oncogene , cancer gene census	<100kb	no	opposite
HOXA11-AS	5.083	Pan_UP	antisense	HOXA11 antisense RNA	HOXA9	1.124		protein_coding	homeobox A9	oncogene , cancer gene census	<100kb	no	opposite
PVT1	3.4	Solid_UP	other ncRNAs	Pvt1 oncogene (non-protein coding)	MYC	0.32		protein_coding	v-myc avian myelocytomatosis viral oncogene homolog	oncogene , cancer gene census	<100kb	no	same
LAMTOR5-AS1	4.065	Solid_UP	antisense	LAMTOR5 antisense RNA 1	RBM15	0.522		protein_coding	RNA binding motif protein 15	oncogene , cancer gene census	<100kb	no	same
RNU6-781P	6.09	Pan_UP	other ncRNAs	RNA, U6 small nuclear 781, pseudogene	ZNF384	-0.06		protein_coding	zinc finger protein 384	oncogene , cancer gene census	<100kb	no	opposite
HOXA11-AS	5.083	Pan_UP	antisense	HOXA11 antisense RNA	HOXA11	1.08		protein_coding	homeobox A11	oncogene , cancer gene census	<1kb	yes	opposite
RP11-284F21.7	5.971	Pan_UP	antisense		PRCC	-1.381		protein_coding	papillary renal cell carcinoma (translocation-associated)	oncogene , cancer gene census	<100kb	no	opposite
HOXA11-AS	5.083	Pan_UP	antisense	HOXA11 antisense RNA	HOXA13	3.727		protein_coding	homeobox A13	oncogene , cancer gene census	<100kb	no	opposite
MCF2L-AS1	3.404	Solid_UP	antisense	MCF2L antisense RNA 1	MCF2L	4.792	Solid_UP	protein_coding	MCF.2 cell line derived transforming sequence-like	oncogene	<1kb	yes	opposite
MNX1-AS1	6.398	Pan_ON	antisense	MNX1 antisense RNA 1 (head to head)	MNX1	4.671	Solid_ON	protein_coding	motor neuron and pancreas homeobox 1	oncogene	<1kb	no	opposite
IFITM9P	-3.197	Solid_DOWN	pseudogene	interferon induced transmembrane protein 9 pseudogene	MYEOV	4.952	Pan_UP	protein_coding	myeloma overexpressed	oncogene	<100kb	yes	opposite
RP11-1070N10.5	5.903	Solid_ON	lincRNA		TCL1B	1.173		protein_coding	T-cell leukemia/lymphoma 1B	oncogene	<100kb	no	same
TSPY26P	-2.544	Solid_OFF	pseudogene	testis specific protein, Y-linked 26, pseudogene	HCK	0		protein_coding	hemopoietic cell kinase	oncogene	<100kb	no	opposite
RP5-884M6.1	7.561	Solid_ON	lincRNA		PIK3CG	-0.339		protein_coding	phosphatidylinositol-4,5-bisphosphate 3-kinase, catalytic subunit gamma	High Confidence Driver	<100kb	no	same
RP11-405F3.4	5.662	Pan_ON	antisense		KIFC3	0.415		protein_coding	kinesin family member C3	High Confidence Driver	<100kb	no	same
RP5-991G20.1	3.55	Pan_UP	antisense		ZFHX3	2.412		protein_coding	zinc finger homeobox 3	High Confidence Driver	<100kb	yes	opposite
CTA-714B7.5	6.844	Pan_UP	lincRNA		TOM1	0.701		protein_coding	target of myb1 (chicken)	High Confidence Driver	<100kb	no	opposite
LINC00243	5.167	Pan_UP	other ncRNAs	long intergenic non-protein coding RNA 243	MDC1	0.164		protein_coding	mediator of DNA-damage checkpoint 1	High Confidence Driver	<100kb	no	same
CTA-714B7.5	6.844	Pan_UP	lincRNA		HMGXB4	0.787		protein_coding	HMG box domain containing 4	High Confidence Driver	<100kb	no	opposite
CTC-338M12.9	6.99	Pan_ON	lincRNA		TRIM7	1.899		protein_coding	tripartite motif containing 7	High Confidence Driver	<100kb	no	opposite
SCARNA14	3.91	Solid_ON	other ncRNAs	small Cajal body-specific RNA 14	MAP2K1	0.09		protein_coding	mitogen-activated protein kinase kinase 1	cancer gene census	<100kb	no	opposite
AC034193.5	2.449	Solid_UP	pseudogene		FANCD2	1.512		protein_coding	Fanconi anemia, complementation group D2	cancer gene census	<100kb	no	same
AC009005.2	4.487	Solid_ON	antisense		BSG	2.155	Pan_UP	protein_coding	basigin (Ok blood group)	cancer antigen	<1kb	yes	opposite
CSAG4	7.292	Pan_ON	pseudogene	CSAG family, member 4 (pseudogene)	CSAG1	9.59	Pan_ON	protein_coding	chondrosarcoma associated gene 1	cancer antigen	<1kb	no	opposite
LRRC37A4P	3.602	Solid_ON	pseudogene	leucine rich repeat containing 37, member A4, pseudogene	ARHGAP27	6.153	Solid_UP	protein_coding	Rho GTPase activating protein 27		<100kb	no	same
RP11-57A19.2	4.966	Pan_UP	lincRNA		SBK1	2.444	Solid_UP	protein_coding	SH3 domain binding kinase 1		<1kb	no	opposite
RHPN1-AS1	3.183	Pan_UP	antisense	RHPN1 antisense RNA 1 (head to head)	RHPN1	3.988	Solid_UP	protein_coding	rhophilin, Rho GTPase binding protein 1		<1kb	no	opposite
DLX6-AS2	5.157	Solid_ON	antisense	DLX6 antisense RNA 2	DLX6	6.331	Solid_UP	protein_coding	distal-less homeobox 6		<1kb	yes	opposite
DLGAP1-AS2	2.309	Pan_UP	antisense	DLGAP1 antisense RNA 2	RP11-874J12.4	3.493	Solid_UP	antisense			<100kb	no	same
RP1-167F1.2	4.849	Solid_ON	antisense		RP4-625H18.2	3.297	Solid_UP	lincRNA			<100kb	yes	same
AC079767.4	5.874	Pan_ON	lincRNA		METTL21A	2.599	Solid_UP	protein_coding	methyltransferase like 21A		<100kb	no	opposite
RP11-284F21.7	3.464	Pan_UP	antisense		HAPLN2	6.144	Solid_ON	protein_coding	hyaluronan and proteoglycan link protein 2		<100kb	no	opposite
RP11-1143G9.2	5.162	Solid_ON	pseudogene		YEATS4	3.591	Solid_ON	protein_coding	YEATS domain containing 4		<100kb	no	same
RP11-1143G9.2	5.162	Solid_ON	pseudogene		CPSF6	4.569	Solid_ON	protein_coding	cleavage and polyadenylation specific factor 6, 68kDa		<100kb	no	same
SNHG1	6.654	Pan_ON	other ncRNAs	small nucleolar RNA host gene 1 (non-protein coding)	WDR74	5.69	Solid_ON	protein_coding	WD repeat domain 74		<100kb	no	same
AC008440.10	5.848	Solid_ON	lincRNA		PRKCG	6.29	Solid_ON	protein_coding	protein kinase C, gamma		<100kb	no	same
RP11-608O21.1	7.337	Solid_ON	lincRNA		RP11-3J1.1	5.351	Solid_ON	lincRNA			<100kb	yes	opposite
MT1L	-3.647	Solid_OFF	pseudogene	metallothionein 1L (gene/pseudogene)	MT1A	-1.606	Solid_OFF	protein_coding	metallothionein 1A		<100kb	no	same
RP11-124N14.3	-2.397	Solid_OFF	antisense		VIM	-2.64	Solid_OFF	protein_coding	vimentin		<1kb	yes	opposite
AC104534.2	7.162	Pan_ON	antisense		RINL	-0.942	Solid_OFF	protein_coding	Ras and Rab interactor-like		<100kb	no	opposite
RNU6-781P	6.09	Pan_UP	other ncRNAs	RNA, U6 small nuclear 781, pseudogene	CD4	-3.463	Solid_DOWN	protein_coding	CD4 molecule		<100kb	no	same
USP2-AS1	2.923	Pan_UP	antisense	USP2 antisense RNA 1 (head to head)	C1QTNF5	-3.339	Solid_DOWN	protein_coding	C1q and tumor necrosis factor related protein 5		<100kb	no	opposite
HOXA11-AS	5.083	Pan_UP	antisense	HOXA11 antisense RNA	HOXA6	3.326	Pan_UP	protein_coding	homeobox A6		<100kb	no	opposite
PCDHB9	2.656	Pan_UP	pseudogene	protocadherin beta 9	PCDHB11	2.452	Pan_UP	protein_coding	protocadherin beta 11		<100kb	no	same
RP11-358D14.2	5.261	Solid_ON	antisense		KCNQ2	5.24	Pan_UP	protein_coding	potassium voltage-gated channel, KQT-like subfamily, member 2		<1kb	yes	opposite
SATB2-AS1	4.332	Pan_UP	antisense	SATB2 antisense RNA 1	SATB2	5.044	Pan_UP	protein_coding	SATB homeobox 2		<1kb	yes	opposite
PCDHB9	2.656	Pan_UP	pseudogene	protocadherin beta 9	PCDHB2	3.012	Pan_UP	protein_coding	protocadherin beta 2		<100kb	no	same
MIR548T	3.949	Solid_ON	other ncRNAs	microRNA 548t	HMGB2	2.385	Pan_UP	protein_coding	high mobility group box 2		<100kb	no	opposite
RP11-358D14.2	5.261	Solid_ON	antisense		EEF1A2	3.47	Pan_UP	protein_coding	eukaryotic translation elongation factor 1 alpha 2		<100kb	no	opposite
CTD-2587H24.5	4.761	Pan_ON	antisense		TNNT1	3.238	Pan_UP	protein_coding	troponin T type 1 (skeletal, slow)		<100kb	no	opposite
RP11-253M7.1	2.592	Pan_UP	antisense		KIF23	2.327	Pan_UP	protein_coding	kinesin family member 23		<1kb	yes	opposite
RNU5D-1	6.889	Solid_ON	other ncRNAs	RNA, U5D small nuclear 1	RNU5F-1	2.546	Pan_UP	other ncRNAs	RNA, U5F small nuclear 1		<100kb	no	same
CTD-2587H24.5	4.761	Pan_ON	antisense		CTD-2587H24.4	4.043	Pan_UP	protein_coding			<100kb	yes	opposite
MIR3621	5.257	Solid_UP	other ncRNAs	microRNA 3621	SAPCD2	3.621	Pan_UP	protein_coding	suppressor APC domain containing 2		<100kb	no	same
RP11-159D12.2	4.299	Solid_UP	lincRNA		SRSF1	5.08	Pan_UP	protein_coding	serine/arginine-rich splicing factor 1		<100kb	no	same
RNU1-85P	4.131	Pan_UP	other ncRNAs	RNA, U1 small nuclear 85, pseudogene	TEX14	7.719	Pan_ON	protein_coding	testis expressed 14		<100kb	yes	same
RP11-344E13.3	8.288	Pan_ON	antisense		CCDC144NL	8.268	Pan_ON	protein_coding	coiled-coil domain containing 144 family, N-terminal like		<1kb	yes	opposite
SMPD4P1	4.783	Pan_ON	pseudogene	sphingomyelin phosphodiesterase 4, neutral membrane (neutral sphingomyelinase-3) pseudogene 1	AC007050.1	4.642	Pan_ON	other ncRNAs			<1kb	no	opposite
LINC00898	4.564	Solid_ON	lincRNA	long intergenic non-protein coding RNA 898	RP11-191L9.4	8.503	Pan_ON	lincRNA			<1kb	no	opposite
MT1L	-3.647	Solid_OFF	pseudogene	metallothionein 1L (gene/pseudogene)	MT1E	-3.145	Pan_OFF	protein_coding	metallothionein 1E		<100kb	no	same
LINC00847	-0.335	Solid_OFF	lincRNA	long intergenic non-protein coding RNA 847	MGAT1	-5.766	Pan_DOWN	protein_coding	mannosyl (alpha-1,3-)-glycoprotein beta-1,2-N-acetylglucosaminyltransferase		<100kb	no	opposite
MT1L	-3.647	Solid_OFF	pseudogene	metallothionein 1L (gene/pseudogene)	MT1M	-3.944		protein_coding	metallothionein 1M		<100kb	no	same
MT1L	-3.647	Solid_OFF	pseudogene	metallothionein 1L (gene/pseudogene)	MT1G	-3.193		protein_coding	metallothionein 1G		<100kb	no	opposite
AC006262.5	5.684	Solid_ON	lincRNA		HIF3A	-6.173		protein_coding	hypoxia inducible factor 3, alpha subunit		<100kb	no	opposite
MT1L	-3.647	Solid_OFF	pseudogene	metallothionein 1L (gene/pseudogene)	MT1H	-3.867		protein_coding	metallothionein 1H		<100kb	no	same
RP11-54D18.3	4.154	Pan_UP	pseudogene		FREM1	2.361		protein_coding	FRAS1 related extracellular matrix 1		<100kb	no	same
USP2-AS1	2.923	Pan_UP	antisense	USP2 antisense RNA 1 (head to head)	USP2	0.742		protein_coding	ubiquitin specific peptidase 2		<1kb	no	opposite
RP11-152P17.2	4.543	Solid_ON	other ncRNAs		ZFPM2	0.518		protein_coding	zinc finger protein, FOG family member 2		<100kb	yes	opposite
MT1L	-3.647	Solid_OFF	pseudogene	metallothionein 1L (gene/pseudogene)	MT1X	-1.184		protein_coding	metallothionein 1X		<100kb	no	same
DISC1FP1	7.123	Solid_UP	other ncRNAs	DISC1 fusion partner 1 (non-protein coding)	NAALAD2	0		protein_coding	N-acetylated alpha-linked acidic dipeptidase 2		<100kb	no	same
RP11-358D14.2	5.261	Solid_ON	antisense		CHRNA4	2.064		protein_coding	cholinergic receptor, nicotinic, alpha 4 (neuronal)		<100kb	no	opposite
RP4-625H18.2	3.297	Solid_UP	lincRNA		ID4	-1.043		protein_coding	inhibitor of DNA binding 4, dominant negative helix-loop-helix protein		<100kb	no	opposite
RP1-167F1.2	4.849	Solid_ON	antisense		ID4	-1.043		protein_coding	inhibitor of DNA binding 4, dominant negative helix-loop-helix protein		<100kb	yes	opposite
MT1L	-3.647	Solid_OFF	pseudogene	metallothionein 1L (gene/pseudogene)	MT1F	-0.827		protein_coding	metallothionein 1F		<100kb	no	same
Z83844.1	4.621	Pan_UP	antisense		LGALS2	1.406		protein_coding	lectin, galactoside-binding, soluble, 2		<100kb	no	same
ZNF667-AS1	-1.531	Solid_OFF	lincRNA	ZNF667 antisense RNA 1 (head to head)	ZNF471	-1.002		protein_coding	zinc finger protein 471		<100kb	no	same
MEG3	-4.559	Solid_OFF	lincRNA	maternally expressed 3 (non-protein coding)	DLK1	0.356		protein_coding	delta-like 1 homolog (Drosophila)		<100kb	no	same
LAMTOR5-AS1	4.065	Solid_UP	antisense	LAMTOR5 antisense RNA 1	SLC16A4	-1.845		protein_coding	solute carrier family 16, member 4		<100kb	yes	opposite
SNHG1	6.654	Pan_ON	other ncRNAs	small nucleolar RNA host gene 1 (non-protein coding)	CHRM1	1.066		protein_coding	cholinergic receptor, muscarinic 1		<100kb	no	same
LINC00910	3.151	Solid_UP	lincRNA	long intergenic non-protein coding RNA 910	ARL4D	-1.06		protein_coding	ADP-ribosylation factor-like 4D		<100kb	no	opposite
AC104534.2	7.162	Pan_ON	antisense		LGALS4	-0.841		protein_coding	lectin, galactoside-binding, soluble, 4		<100kb	no	opposite
MAGI2-AS3	-3.704	Solid_OFF	other ncRNAs	MAGI2 antisense RNA 3	MAGI2	-2.29		protein_coding	membrane associated guanylate kinase, WW and PDZ domain containing 2		<1kb	yes	opposite
PCDHB9	2.656	Pan_UP	pseudogene	protocadherin beta 9	PCDHB4	0.063		protein_coding	protocadherin beta 4		<100kb	no	same
AC008440.10	5.848	Solid_ON	lincRNA		MYADM	3.298		protein_coding	myeloid-associated differentiation marker		<1kb	no	same
CTD-2152M20.2	4.555	Pan_UP	antisense		PDZD2	0		protein_coding	PDZ domain containing 2		<100kb	yes	opposite
MIR4428	3.446	Pan_ON	other ncRNAs	microRNA 4428	RYR2	0.161		protein_coding	ryanodine receptor 2 (cardiac)		<100kb	yes	same
PCDHB9	2.656	Pan_UP	pseudogene	protocadherin beta 9	PCDHB5	1.353		protein_coding	protocadherin beta 5		<100kb	no	same
PCAT7	6.719	Solid_ON	antisense	prostate cancer associated transcript 7 (non-protein coding)	FBP1	-0.068		protein_coding	fructose-1,6-bisphosphatase 1		<100kb	no	opposite
MT1L	-3.647	Solid_OFF	pseudogene	metallothionein 1L (gene/pseudogene)	MT2A	-2.364		protein_coding	metallothionein 2A		<100kb	no	same
ZNF667-AS1	-1.531	Solid_OFF	lincRNA	ZNF667 antisense RNA 1 (head to head)	ZNF582	-0.193		protein_coding	zinc finger protein 582		<100kb	no	opposite
ZNF542	-0.367	Pan_OFF	pseudogene	zinc finger protein 542	ZNF582	-0.193		protein_coding	zinc finger protein 582		<100kb	yes	opposite
RP1-46F2.3	3.479	Solid_ON	lincRNA		CUX2	-1.408		protein_coding	cut-like homeobox 2		<100kb	no	opposite
SNHG18	-2.063	Solid_OFF	lincRNA	small nucleolar RNA host gene 18 (non-protein coding)	SEMA5A	-1.039		protein_coding	sema domain, seven thrombospondin repeats (type 1 and type 1-like), transmembrane domain (TM) and short cytoplasmic domain, (semaphorin) 5A		<1kb	no	opposite
LINC00847	-0.335	Solid_OFF	lincRNA	long intergenic non-protein coding RNA 847	BTNL8	-0.754		protein_coding	butyrophilin-like 8		<100kb	no	same
ZNF667-AS1	-1.531	Solid_OFF	lincRNA	ZNF667 antisense RNA 1 (head to head)	ZNF667	-0.677		protein_coding	zinc finger protein 667		<1kb	yes	opposite
RP11-54O7.16	3.939	Pan_UP	lincRNA		SAMD11	1.636		protein_coding	sterile alpha motif domain containing 11		<100kb	no	same
RP11-284F21.7	5.971	Pan_UP	antisense		NES	0.444		protein_coding	nestin		<100kb	no	same
PCDHB9	2.656	Pan_UP	pseudogene	protocadherin beta 9	PCDHB7	0.55		protein_coding	protocadherin beta 7		<100kb	no	same
PCDHB9	2.656	Pan_UP	pseudogene	protocadherin beta 9	PCDHB15	-0.226		protein_coding	protocadherin beta 15		<100kb	no	same
AC018890.6	3.852	Pan_ON	antisense		GPR155	-0.31		protein_coding	G protein-coupled receptor 155		<100kb	no	opposite
RP11-253M7.1	2.592	Pan_UP	antisense		PAQR5	0		protein_coding	progestin and adipoQ receptor family member V		<100kb	yes	opposite
HOXA11-AS	5.083	Pan_UP	antisense	HOXA11 antisense RNA	HOXA5	0.263		protein_coding	homeobox A5		<100kb	no	opposite
DGCR5	2.395	Solid_UP	antisense	DiGeorge syndrome critical region gene 5 (non-protein coding)	PRODH	2.599		protein_coding	proline dehydrogenase (oxidase) 1		<100kb	no	opposite
HOXA11-AS	5.083	Pan_UP	antisense	HOXA11 antisense RNA	HOXA2	-1.847		protein_coding	homeobox A2		<100kb	no	opposite
HOXA11-AS	5.083	Pan_UP	antisense	HOXA11 antisense RNA	HOXA7	-1.089		protein_coding	homeobox A7		<100kb	no	opposite
DCLRE1CP1	3.535	Pan_UP	pseudogene	DNA cross-link repair 1C pseudogene 1	NMT2	0.456		protein_coding	N-myristoyltransferase 2		<100kb	no	same
RP11-99J16__A.2	5.874	Pan_ON	antisense		CAPN9	0.649		protein_coding	calpain 9		<100kb	yes	opposite
HOXA11-AS	5.083	Pan_UP	antisense	HOXA11 antisense RNA	HOXA4	1.457		protein_coding	homeobox A4		<100kb	no	opposite
PCAT7	6.756	Solid_ON	antisense	prostate cancer associated transcript 7 (non-protein coding)	FBP2	0		protein_coding	fructose-1,6-bisphosphatase 2		<100kb	yes	opposite
PCDHB9	2.656	Pan_UP	pseudogene	protocadherin beta 9	PCDHB3	-0.779		protein_coding	protocadherin beta 3		<100kb	no	same
KCNQ1OT1	2.926	Pan_UP	antisense	KCNQ1 opposite strand/antisense transcript 1 (non-protein coding)	KCNQ1	-1.253		protein_coding	potassium voltage-gated channel, KQT-like subfamily, member 1		<100kb	yes	opposite
AC034193.5	2.449	Solid_UP	pseudogene		IL17RE	-1.339		protein_coding	interleukin 17 receptor E		<100kb	no	same
RNU5D-1	6.889	Solid_ON	other ncRNAs	RNA, U5D small nuclear 1	BEST4	0		protein_coding	bestrophin 4		<100kb	no	same
RNU5F-1	2.546	Pan_UP	other ncRNAs	RNA, U5F small nuclear 1	BEST4	0		protein_coding	bestrophin 4		<100kb	no	same
PCDHB9	2.656	Pan_UP	pseudogene	protocadherin beta 9	PCDHB18	1.095		pseudogene	protocadherin beta 18 pseudogene		<100kb	no	same
FEZF1-AS1	7.318	Solid_ON	antisense	FEZF1 antisense RNA 1	CADPS2	3.283		protein_coding	Ca++-dependent secretion activator 2		<100kb	no	opposite
RNA5SP18	3.586	Solid_ON	other ncRNAs	RNA, 5S ribosomal pseudogene 18	RHOU	1.603		protein_coding	ras homolog family member U		<100kb	no	opposite
MIR3621	5.257	Solid_UP	other ncRNAs	microRNA 3621	SLC34A3	0		protein_coding	solute carrier family 34 (type II sodium/phosphate contransporter), member 3		<100kb	no	opposite
RP1-90G24.10	4.728	Solid_UP	antisense		SLC5A4	0		protein_coding	solute carrier family 5 (glucose activated ion channel), member 4		<100kb	yes	opposite
CTC-453G23.8	4.711	Solid_UP	antisense		PLA2G4C	0.46		protein_coding	phospholipase A2, group IVC (cytosolic, calcium-independent)		<100kb	no	opposite
AC009005.2	4.487	Solid_ON	antisense		GZMM	2.607		protein_coding	granzyme M (lymphocyte met-ase 1)		<100kb	no	opposite
LAMTOR5-AS1	4.065	Solid_UP	antisense	LAMTOR5 antisense RNA 1	PROK1	0.527		protein_coding	prokineticin 1		<100kb	no	same
RP11-405F3.4	5.662	Pan_ON	antisense		CCDC135	2.956		protein_coding	coiled-coil domain containing 135		<100kb	yes	opposite
ZBED3-AS1	4.308	Pan_UP	antisense	ZBED3 antisense RNA 1	ZBED3	1.029		protein_coding	zinc finger, BED-type containing 3		<1kb	yes	opposite
ZNF667-AS1	-1.531	Solid_OFF	lincRNA	ZNF667 antisense RNA 1 (head to head)	ZNF583	-0.034		protein_coding	zinc finger protein 583		<100kb	no	same
ZNF542	-0.367	Pan_OFF	pseudogene	zinc finger protein 542	ZNF583	-0.034		protein_coding	zinc finger protein 583		<100kb	no	same
ZNF667-AS1	-1.531	Solid_OFF	lincRNA	ZNF667 antisense RNA 1 (head to head)	ZNF470	-0.543		protein_coding	zinc finger protein 470		<100kb	no	same
RP11-124N14.3	-2.397	Solid_OFF	antisense		TRDMT1	-0.473		protein_coding	tRNA aspartic acid methyltransferase 1		<100kb	no	same
PCDHB9	2.656	Pan_UP	pseudogene	protocadherin beta 9	PCDHB12	2.669		protein_coding	protocadherin beta 12		<100kb	no	same
RP11-874J12.4	3.493	Solid_UP	antisense		DLGAP1	0.792		protein_coding	discs, large (Drosophila) homolog-associated protein 1		<1kb	yes	opposite
DLGAP1-AS2	2.309	Pan_UP	antisense	DLGAP1 antisense RNA 2	DLGAP1	1.533		protein_coding	discs, large (Drosophila) homolog-associated protein 1		<1kb	yes	opposite
CTD-2587H24.5	4.761	Pan_ON	antisense		PPP1R12C	1.75		protein_coding	protein phosphatase 1, regulatory subunit 12C		<100kb	no	opposite
RP11-405F3.4	5.662	Pan_ON	antisense		GPR97	1.169		protein_coding	G protein-coupled receptor 97		<100kb	yes	opposite
RP11-390F4.6	3.072	Pan_UP	lincRNA		GLDC	3.092		protein_coding	glycine dehydrogenase (decarboxylating)		<1kb	no	opposite
TERC	2.021	Pan_UP	lincRNA	telomerase RNA component	LRRC34	-0.2		protein_coding	leucine rich repeat containing 34		<100kb	no	same
MT1L	-3.647	Solid_OFF	pseudogene	metallothionein 1L (gene/pseudogene)	MT1DP	1.258		pseudogene	metallothionein 1D, pseudogene		<100kb	no	same
AC009005.2	4.487	Solid_ON	antisense		MADCAM1	0.078		protein_coding	mucosal vascular addressin cell adhesion molecule 1		<100kb	no	opposite
RP11-758P17.3	7.228	Solid_ON	antisense		ZCWPW1	0.659		protein_coding	zinc finger, CW type with PWWP domain 1		<100kb	no	opposite
AC074363.1	3.219	Solid_UP	lincRNA		XIRP2	0.473		protein_coding	xin actin-binding repeat containing 2		<100kb	no	same
RP1-46F2.3	3.479	Solid_ON	lincRNA		MYL2	1.837		protein_coding	myosin, light chain 2, regulatory, cardiac, slow		<100kb	no	same
CTD-2314G24.2	4.895	Solid_UP	antisense		ISL1	4.308		protein_coding	ISL LIM homeobox 1		<1kb	yes	opposite
RP11-845M18.6	3.749	Solid_UP	antisense		KRT85	0.893		protein_coding	keratin 85		<100kb	no	same
RP4-792G4.2	4.73	Solid_ON	antisense		FOXD3	4.064		protein_coding	forkhead box D3		<1kb	yes	opposite
DCLRE1CP1	3.535	Pan_UP	pseudogene	DNA cross-link repair 1C pseudogene 1	OLAH	-2.762		protein_coding	oleoyl-ACP hydrolase		<100kb	yes	opposite
MT1L	-3.647	Solid_OFF	pseudogene	metallothionein 1L (gene/pseudogene)	BBS2	0.205		protein_coding	Bardet-Biedl syndrome 2		<100kb	no	opposite
AC079767.4	5.874	Pan_ON	lincRNA		CCNYL1	-0.28		protein_coding	cyclin Y-like 1		<100kb	no	same
RP4-680D5.2	4.498	Solid_UP	antisense		CASP9	0.139		protein_coding	caspase 9, apoptosis-related cysteine peptidase		<100kb	no	same
RP4-680D5.2	4.498	Solid_UP	antisense		DDI2	0.565		protein_coding	DNA-damage inducible 1 homolog 2 (S. cerevisiae)		<100kb	no	opposite
CTC-548K16.1	3.806	Solid_ON	lincRNA		CD97	-0.893		protein_coding	CD97 molecule		<100kb	no	same
PCDHB9	2.656	Pan_UP	pseudogene	protocadherin beta 9	PCDHB6	3.417		protein_coding	protocadherin beta 6		<100kb	no	same
RNU5F-1	2.546	Pan_UP	other ncRNAs	RNA, U5F small nuclear 1	TCTEX1D4	1.405		protein_coding	Tctex1 domain containing 4		<100kb	no	same
RNU5D-1	6.889	Solid_ON	other ncRNAs	RNA, U5D small nuclear 1	TCTEX1D4	1.405		protein_coding	Tctex1 domain containing 4		<100kb	no	same
CTC-453G23.8	4.711	Solid_UP	antisense		CARD8	-0.882		protein_coding	caspase recruitment domain family, member 8		<100kb	yes	opposite
SNORA68	5.001	Solid_ON	other ncRNAs	small nucleolar RNA, H/ACA box 68	ZFX	0.32		protein_coding	zinc finger protein, X-linked		<100kb	no	same
RNU5F-1	2.546	Pan_UP	other ncRNAs	RNA, U5F small nuclear 1	PLK3	-1.105		protein_coding	polo-like kinase 3		<100kb	no	opposite
RNU5D-1	6.889	Solid_ON	other ncRNAs	RNA, U5D small nuclear 1	PLK3	-1.105		protein_coding	polo-like kinase 3		<100kb	no	opposite
PCDHB9	2.656	Pan_UP	pseudogene	protocadherin beta 9	PCDHB16	2.934		protein_coding	protocadherin beta 16		<100kb	no	same
RP11-98G7.1	6.329	Pan_ON	lincRNA		MEF2D	0.214		protein_coding	myocyte enhancer factor 2D		<100kb	no	same
AC104534.2	7.162	Pan_ON	antisense		ECH1	1.458		protein_coding	enoyl CoA hydratase 1, peroxisomal		<1kb	yes	opposite
AC068580.7	5.539	Solid_ON	lincRNA		LSP1	0.179		protein_coding	lymphocyte-specific protein 1		<100kb	no	opposite
RP11-159D12.2	4.299	Solid_UP	lincRNA		VEZF1	-0.305		protein_coding	vascular endothelial zinc finger 1		<100kb	no	same
AC034193.5	2.449	Solid_UP	pseudogene		IL17RC	-0.067		protein_coding	interleukin 17 receptor C		<100kb	no	same
AC068580.7	5.539	Solid_ON	lincRNA		TNNI2	-0.501		protein_coding	troponin I type 2 (skeletal, fast)		<100kb	no	opposite
RP11-159D12.2	4.299	Solid_UP	lincRNA		DYNLL2	0.143		protein_coding	dynein, light chain, LC8-type 2		<100kb	no	opposite
RP11-363E7.3	4.286	Pan_ON	pseudogene		ACER2	-0.98		protein_coding	alkaline ceramidase 2		<100kb	no	opposite
RNU5D-1	6.889	Solid_ON	other ncRNAs	RNA, U5D small nuclear 1	BTBD19	-2.486		protein_coding	BTB (POZ) domain containing 19		<100kb	no	opposite
RNU5F-1	2.546	Pan_UP	other ncRNAs	RNA, U5F small nuclear 1	BTBD19	-2.486		protein_coding	BTB (POZ) domain containing 19		<100kb	no	opposite
RNU5D-1	6.889	Solid_ON	other ncRNAs	RNA, U5D small nuclear 1	C1orf228	1.145		protein_coding	chromosome 1 open reading frame 228		<100kb	no	opposite
RNU5F-1	2.546	Pan_UP	other ncRNAs	RNA, U5F small nuclear 1	C1orf228	1.145		protein_coding	chromosome 1 open reading frame 228		<100kb	yes	opposite
LINC01059	3.265	Solid_ON	lincRNA	long intergenic non-protein coding RNA 1059	GRAMD1B	0		protein_coding	GRAM domain containing 1B		<100kb	no	same
AC034193.5	2.449	Solid_UP	pseudogene		CRELD1	0.325		protein_coding	cysteine-rich with EGF-like domains 1		<100kb	no	same
AL022344.4	5.65	Pan_ON	lincRNA		ZNF33B	3.347		other ncRNAs	zinc finger protein 33B		<100kb	no	same
AC018890.6	3.852	Pan_ON	antisense		WIPF1	-0.038		protein_coding	WAS/WASL interacting protein family, member 1		<100kb	yes	opposite
RP11-98G7.1	6.329	Pan_ON	lincRNA		RHBG	3.227		protein_coding	Rh family, B glycoprotein (gene/pseudogene)		<100kb	no	opposite
AC068580.7	5.539	Solid_ON	lincRNA		FAM99B	-1.119		antisense	family with sequence similarity 99, member B (non-protein coding)		<100kb	no	same
Z83844.1	4.621	Pan_UP	antisense		TRIOBP	-0.629		protein_coding	TRIO and F-actin binding protein		<100kb	no	opposite
CTC-559E9.4	-0.118	Pan_OFF	lincRNA		ZNF14	0.974		protein_coding	zinc finger protein 14		<100kb	no	same
MFI2-AS1	2.594	Pan_UP	antisense	MFI2 antisense RNA 1	PIGZ	0.607		protein_coding	phosphatidylinositol glycan anchor biosynthesis, class Z		<100kb	no	opposite
USP2-AS1	2.923	Pan_UP	antisense	USP2 antisense RNA 1 (head to head)	MCAM	-0.097		protein_coding	melanoma cell adhesion molecule		<100kb	no	opposite
LINC00243	5.167	Pan_UP	other ncRNAs	long intergenic non-protein coding RNA 243	IER3	0.021		protein_coding	immediate early response 3		<100kb	no	same
RP11-54A9.1	-2.09	Solid_OFF	lincRNA		BBS10	0.579		protein_coding	Bardet-Biedl syndrome 10		<100kb	no	opposite
RP11-27K13.3	4.676	Solid_ON	antisense		CD101	-1.432		protein_coding	CD101 molecule		<100kb	yes	opposite
RP11-99J16__A.2	5.874	Pan_ON	antisense		C1orf198	0.674		protein_coding	chromosome 1 open reading frame 198		<100kb	no	same
SCARNA14	3.91	Solid_ON	other ncRNAs	small Cajal body-specific RNA 14	DIS3L	1.175		protein_coding	DIS3 mitotic control homolog (S. cerevisiae)-like		<100kb	no	opposite
CTC-513N18.7	-1.022	Pan_OFF	lincRNA		ZNF737	0.134		protein_coding	zinc finger protein 737		<100kb	yes	same
LRRC37A4P	3.602	Solid_ON	pseudogene	leucine rich repeat containing 37, member A4, pseudogene	PLEKHM1	-2.575		protein_coding	pleckstrin homology domain containing, family M (with RUN domain) member 1		<100kb	no	same
RP4-680D5.2	4.498	Solid_UP	antisense		DNAJC16	0.291		protein_coding	DnaJ (Hsp40) homolog, subfamily C, member 16		<100kb	yes	opposite
RP4-785G19.5	3.784	Pan_UP	other ncRNAs		ASIP	1.667		protein_coding	agouti signaling protein		<100kb	yes	opposite
AC068580.7	5.539	Solid_ON	lincRNA		SYT8	-1.298		protein_coding	synaptotagmin VIII		<100kb	no	opposite
RNU1-85P	4.131	Pan_UP	other ncRNAs	RNA, U1 small nuclear 85, pseudogene	PPM1E	1.672		protein_coding	protein phosphatase, Mg2+/Mn2+ dependent, 1E		<100kb	no	opposite
CTD-2521M24.9	3.938	Solid_ON	lincRNA		MRPL34	-0.214		protein_coding	mitochondrial ribosomal protein L34		<100kb	no	same
AC074117.10	2.978	Solid_UP	antisense		IFT172	-1.316		protein_coding	intraflagellar transport 172 homolog (Chlamydomonas)		<100kb	no	opposite
MIR3621	5.257	Solid_UP	other ncRNAs	microRNA 3621	LRRC26	2.754		protein_coding	leucine rich repeat containing 26		<1kb	yes	same
RP5-1139I1.1	4.61	Pan_UP	lincRNA		PGRMC1	-0.491		protein_coding	progesterone receptor membrane component 1		<100kb	no	same
RP11-159D12.2	4.299	Solid_UP	lincRNA		CUEDC1	0.7		protein_coding	CUE domain containing 1		<100kb	no	same
AC104534.2	7.162	Pan_ON	antisense		SIRT2	-0.765		protein_coding	sirtuin 2		<100kb	no	opposite
AC074117.10	2.978	Solid_UP	antisense		SNX17	-0.446		protein_coding	sorting nexin 17		<100kb	no	same
AC007050.1	4.642	Pan_ON	other ncRNAs		PI4KA	1.549		protein_coding	phosphatidylinositol 4-kinase, catalytic, alpha		<100kb	no	opposite
SMPD4P1	4.783	Pan_ON	pseudogene	sphingomyelin phosphodiesterase 4, neutral membrane (neutral sphingomyelinase-3) pseudogene 1	PI4KA	1.549		protein_coding	phosphatidylinositol 4-kinase, catalytic, alpha		<100kb	no	same
RP4-798P15.3	-0.253	Solid_OFF	other ncRNAs		RASAL2	0.129		protein_coding	RAS protein activator like 2		<100kb	no	opposite
AC008440.10	5.848	Solid_ON	lincRNA		CACNG7	-0.026		protein_coding	calcium channel, voltage-dependent, gamma subunit 7		<100kb	no	same
RNU5F-1	2.546	Pan_UP	other ncRNAs	RNA, U5F small nuclear 1	TMEM53	-0.655		protein_coding	transmembrane protein 53		<100kb	no	same
RNU5D-1	6.889	Solid_ON	other ncRNAs	RNA, U5D small nuclear 1	TMEM53	-0.655		protein_coding	transmembrane protein 53		<100kb	no	same
RP11-845M18.6	3.749	Solid_UP	antisense		KRT7	-3.487		protein_coding	keratin 7		<100kb	no	opposite
RP4-665J23.1	2.656	Pan_UP	lincRNA		ZNF644	0.28		protein_coding	zinc finger protein 644		<100kb	no	same
RNU2-64P	3.891	Pan_UP	other ncRNAs	RNA, U2 small nuclear 64, pseudogene	PPP4R2	0.816		protein_coding	protein phosphatase 4, regulatory subunit 2		<100kb	no	same
MT1L	-3.647	Solid_OFF	pseudogene	metallothionein 1L (gene/pseudogene)	MT1B	-0.041		protein_coding	metallothionein 1B		<100kb	no	same
AC008440.10	5.848	Solid_ON	lincRNA		NLRP12	1.061		protein_coding	NLR family, pyrin domain containing 12		<100kb	no	opposite
HOXA11-AS	5.083	Pan_UP	antisense	HOXA11 antisense RNA	HOXA3	0.769		protein_coding	homeobox A3		<100kb	no	opposite
SNHG1	6.654	Pan_ON	other ncRNAs	small nucleolar RNA host gene 1 (non-protein coding)	STX5	0.4		protein_coding	syntaxin 5		<100kb	no	same
RP3-323P24.3	3.906	Pan_UP	antisense		SPIN2B	0.542		protein_coding	spindlin family, member 2B		<1kb	no	opposite
RP4-785G19.5	3.784	Pan_UP	other ncRNAs		ITCH	0.557		protein_coding	itchy E3 ubiquitin protein ligase		<100kb	no	opposite
CTD-2521M24.9	3.938	Solid_ON	lincRNA		SLC27A1	-0.569		protein_coding	solute carrier family 27 (fatty acid transporter), member 1		<100kb	no	same
RP11-967K21.1	2.172	Solid_UP	antisense		CCDC91	0.597		protein_coding	coiled-coil domain containing 91		<1kb	yes	opposite
RP11-99J16__A.2	5.874	Pan_ON	antisense		AGT	-0.124		protein_coding	angiotensinogen (serpin peptidase inhibitor, clade A, member 8)		<100kb	yes	same
CTC-308K20.1	2.832	Solid_UP	antisense		ATP6V0E1	-0.566		protein_coding	ATPase, H+ transporting, lysosomal 9kDa, V0 subunit e1		<100kb	no	opposite
MFI2-AS1	2.594	Pan_UP	antisense	MFI2 antisense RNA 1	DLG1	1.031		protein_coding	discs, large homolog 1 (Drosophila)		<100kb	no	opposite
TERC	2.021	Pan_UP	lincRNA	telomerase RNA component	MYNN	0.827		protein_coding	myoneurin		<100kb	no	opposite
SCARNA14	3.91	Solid_ON	other ncRNAs	small Cajal body-specific RNA 14	MEGF11	5.551		protein_coding	multiple EGF-like-domains 11		<100kb	no	same
ZNRF2P2	4.559	Solid_UP	pseudogene	zinc and ring finger 2 pseudogene 2	PRR15	1.027		protein_coding	proline rich 15		<100kb	no	opposite
MEG3	-4.559	Solid_OFF	lincRNA	maternally expressed 3 (non-protein coding)	MEG8	-2.923		lincRNA	maternally expressed 8 (non-protein coding)		<100kb	no	same
AC009005.2	4.487	Solid_ON	antisense		ODF3L2	0.116		protein_coding	outer dense fiber of sperm tails 3-like 2		<100kb	no	same
RP11-564D11.3	4.525	Solid_UP	pseudogene		PSTK	1.571		protein_coding	phosphoseryl-tRNA kinase		<100kb	no	same
CSAG4	7.292	Pan_ON	pseudogene	CSAG family, member 4 (pseudogene)	CETN2	0.181		protein_coding	centrin, EF-hand protein, 2		<100kb	no	same
RP11-1070N10.5	5.903	Solid_ON	lincRNA		GLRX5	0.013		protein_coding	glutaredoxin 5		<100kb	no	same
AC079135.1	4.78	Pan_UP	antisense		ASB18	0		protein_coding	ankyrin repeat and SOCS box containing 18		<100kb	yes	opposite
AC034193.5	2.449	Solid_UP	pseudogene		JAGN1	-0.432		protein_coding	jagunal homolog 1 (Drosophila)		<100kb	no	same
RP1-90G24.10	4.728	Solid_UP	antisense		C22orf42	0.387		protein_coding	chromosome 22 open reading frame 42		<100kb	no	opposite
AC104534.2	7.162	Pan_ON	antisense		ACTN4	-0.274		protein_coding	actinin, alpha 4		<100kb	no	same
RP11-725P16.2	3.636	Solid_UP	lincRNA		GPR39	-0.199		protein_coding	G protein-coupled receptor 39		<100kb	no	opposite
RP11-564D11.3	4.525	Solid_UP	pseudogene		FAM24A	0		protein_coding	family with sequence similarity 24, member A		<100kb	no	same
MT1L	-3.647	Solid_OFF	pseudogene	metallothionein 1L (gene/pseudogene)	MT3	-3.732		protein_coding	metallothionein 3		<100kb	no	same
RP11-475N22.4	3.687	Solid_ON	antisense		DNAJB8	0		protein_coding	DnaJ (Hsp40) homolog, subfamily B, member 8		<100kb	no	opposite
LAMTOR5-AS1	4.065	Solid_UP	antisense	LAMTOR5 antisense RNA 1	CYMP	-0.446		pseudogene	chymosin pseudogene		<100kb	no	same
RP11-96H19.1	5.352	Solid_UP	lincRNA		SLC38A2	0.412		protein_coding	solute carrier family 38, member 2		<100kb	no	opposite
ZBED3-AS1	4.308	Pan_UP	antisense	ZBED3 antisense RNA 1	AGGF1	0.312		protein_coding	angiogenic factor with G patch and FHA domains 1		<100kb	no	same
AC104135.3	6.026	Solid_UP	lincRNA		POLE4	-0.096		protein_coding	polymerase (DNA-directed), epsilon 4, accessory subunit		<100kb	no	same
RP11-845M18.6	3.749	Solid_UP	antisense		KRT84	0.638		protein_coding	keratin 84		<100kb	no	same
MIR3621	5.257	Solid_UP	other ncRNAs	microRNA 3621	ANAPC2	-0.084		protein_coding	anaphase promoting complex subunit 2		<100kb	no	same
RP11-363E7.3	4.286	Pan_ON	pseudogene		RPS6	0.147		protein_coding	ribosomal protein S6		<100kb	no	same
CTC-498J12.1	2.69	Pan_UP	lincRNA		SLC30A5	0.534		protein_coding	solute carrier family 30 (zinc transporter), member 5		<100kb	no	opposite
CTD-2152M20.2	4.555	Pan_UP	antisense		GOLPH3	0.259		protein_coding	golgi phosphoprotein 3 (coat-protein)		<100kb	no	same
AC074117.10	2.978	Solid_UP	antisense		DNAJC5G	0.435		protein_coding	DnaJ (Hsp40) homolog, subfamily C, member 5 gamma		<100kb	no	same
CTC-338M12.9	6.99	Pan_ON	lincRNA		TRIM52	1.153		protein_coding	tripartite motif containing 52		<100kb	no	opposite
ZNF542	-0.367	Pan_OFF	pseudogene	zinc finger protein 542	ZSCAN5A	0		protein_coding	zinc finger and SCAN domain containing 5A		<1kb	yes	opposite
RP4-798P15.3	-0.253	Solid_OFF	other ncRNAs		SEC16B	-1.78		protein_coding	SEC16 homolog B (S. cerevisiae)		<100kb	yes	same
RP11-758P17.3	7.228	Solid_ON	antisense		PILRA	-1.584		protein_coding	paired immunoglobin-like type 2 receptor alpha		<100kb	no	same
LINC00243	5.03	Pan_ON	other ncRNAs	long intergenic non-protein coding RNA 243	FLOT1	0.51		protein_coding	flotillin 1		<100kb	no	same
RNU6-781P	6.09	Pan_UP	other ncRNAs	RNA, U6 small nuclear 781, pseudogene	PTMS	0.378		protein_coding	parathymosin		<100kb	no	same
CTC-559E9.4	-0.118	Pan_OFF	lincRNA		ZNF253	0.509		protein_coding	zinc finger protein 253		<100kb	no	opposite
RP4-680D5.2	4.498	Solid_UP	antisense		AGMAT	-0.686		protein_coding	agmatine ureohydrolase (agmatinase)		<100kb	no	same
LINC01058	4.103	Pan_UP	lincRNA	long intergenic non-protein coding RNA 1058	HMGB1	1.374		protein_coding	high mobility group box 1		<100kb	no	same
DCLRE1CP1	3.535	Pan_UP	pseudogene	DNA cross-link repair 1C pseudogene 1	C10orf111	5.487		protein_coding	chromosome 10 open reading frame 111		<100kb	no	same
RP11-344E13.3	4.054	Pan_ON	antisense		USP22	0.045		protein_coding	ubiquitin specific peptidase 22		<100kb	yes	opposite
RP4-680D5.2	4.498	Solid_UP	antisense		PLEKHM2	-0.51		protein_coding	pleckstrin homology domain containing, family M (with RUN domain) member 2		<100kb	no	opposite
MIR3621	5.257	Solid_UP	other ncRNAs	microRNA 3621	TMEM203	-0.22		protein_coding	transmembrane protein 203		<100kb	no	same
RP11-434I12.2	5.899	Pan_UP	antisense		RDH10	0.506		protein_coding	retinol dehydrogenase 10 (all-trans)		<100kb	yes	opposite
SNHG1	6.654	Pan_ON	other ncRNAs	small nucleolar RNA host gene 1 (non-protein coding)	NXF1	4.755		protein_coding	nuclear RNA export factor 1		<100kb	no	same
CTC-338M12.9	6.99	Pan_ON	lincRNA		TRIM41	-0.065		protein_coding	tripartite motif containing 41		<100kb	no	same
MT1L	-3.647	Solid_OFF	pseudogene	metallothionein 1L (gene/pseudogene)	MT4	-0.599		protein_coding	metallothionein 4		<100kb	no	same
AC034193.5	2.449	Solid_UP	pseudogene		PRRT3	0.313		protein_coding	proline-rich transmembrane protein 3		<100kb	no	opposite
FTH1P22	-2.583	Pan_DOWN	pseudogene	ferritin, heavy polypeptide 1 pseudogene 22	CD2	-1.05		protein_coding	CD2 molecule		<100kb	no	opposite
AC008440.10	5.848	Solid_ON	lincRNA		CACNG8	0.845		protein_coding	calcium channel, voltage-dependent, gamma subunit 8		<100kb	no	same
RNU6-781P	6.09	Pan_UP	other ncRNAs	RNA, U6 small nuclear 781, pseudogene	COPS7A	-0.596		protein_coding	COP9 signalosome subunit 7A		<100kb	no	same
RP11-99J16__A.2	5.874	Pan_ON	antisense		COG2	0.678		protein_coding	component of oligomeric golgi complex 2		<100kb	no	opposite
RP11-187O7.3	3.476	Pan_ON	lincRNA		VASH1	-1.752		protein_coding	vasohibin 1		<100kb	no	opposite
RNU6-781P	6.09	Pan_UP	other ncRNAs	RNA, U6 small nuclear 781, pseudogene	ACRBP	-0.63		protein_coding	acrosin binding protein		<100kb	no	opposite
CTC-308K20.1	2.832	Solid_UP	antisense		ERGIC1	-1.361		protein_coding	endoplasmic reticulum-golgi intermediate compartment (ERGIC) 1		<100kb	no	opposite
PCAT7	6.719	Solid_ON	antisense	prostate cancer associated transcript 7 (non-protein coding)	HIATL1	2.032		protein_coding	hippocampus abundant transcript-like 1		<100kb	no	same
RP11-434I12.2	5.899	Pan_UP	antisense		RPL7	1.329		protein_coding	ribosomal protein L7		<100kb	no	same
SNHG1	6.654	Pan_ON	other ncRNAs	small nucleolar RNA host gene 1 (non-protein coding)	TMEM179B	-0.218		protein_coding	transmembrane protein 179B		<100kb	no	opposite
RP11-405F3.4	5.662	Pan_ON	antisense		GPR114	1.248		protein_coding	G protein-coupled receptor 114		<100kb	no	opposite
TSPY26P	-2.544	Solid_OFF	pseudogene	testis specific protein, Y-linked 26, pseudogene	KIF3B	0.253		protein_coding	kinesin family member 3B		<100kb	no	opposite
CTD-2587H24.5	4.761	Pan_ON	antisense		EPS8L1	-1.405		protein_coding	EPS8-like 1		<100kb	no	same
RNU6-781P	6.09	Pan_UP	other ncRNAs	RNA, U6 small nuclear 781, pseudogene	LAG3	0.281		protein_coding	lymphocyte-activation gene 3		<100kb	no	same
SNHG1	6.654	Pan_ON	other ncRNAs	small nucleolar RNA host gene 1 (non-protein coding)	TAF6L	-0.384		protein_coding	TAF6-like RNA polymerase II, p300/CBP-associated factor (PCAF)-associated factor, 65kDa		<100kb	no	opposite
RNU5D-1	6.889	Solid_ON	other ncRNAs	RNA, U5D small nuclear 1	RPS8	0.304		protein_coding	ribosomal protein S8		<100kb	no	opposite
RNU5F-1	2.546	Pan_UP	other ncRNAs	RNA, U5F small nuclear 1	RPS8	0.304		protein_coding	ribosomal protein S8		<100kb	no	opposite
AC034193.5	2.449	Solid_UP	pseudogene		CIDECP	-0.008		pseudogene	cell death-inducing DFFA-like effector c pseudogene		<100kb	no	opposite
DGCR5	2.395	Solid_UP	antisense	DiGeorge syndrome critical region gene 5 (non-protein coding)	DGCR2	-2.672		protein_coding	DiGeorge syndrome critical region gene 2		<100kb	no	opposite
RP11-108M9.4	-0.607	Solid_OFF	lincRNA		CROCC	1.661		protein_coding	ciliary rootlet coiled-coil, rootletin		<100kb	yes	opposite
RP5-1139I1.1	4.61	Pan_UP	lincRNA		SLC25A43	0.141		protein_coding	solute carrier family 25, member 43		<100kb	no	same
AC074117.10	2.978	Solid_UP	antisense		NRBP1	-0.175		protein_coding	nuclear receptor binding protein 1		<100kb	no	same
MIR3621	5.257	Solid_UP	other ncRNAs	microRNA 3621	FAM166A	0		protein_coding	family with sequence similarity 166, member A		<100kb	no	same
Z83844.1	4.621	Pan_UP	antisense		LGALS1	-1.298		protein_coding	lectin, galactoside-binding, soluble, 1		<100kb	no	opposite
LINC00910	3.151	Solid_UP	lincRNA	long intergenic non-protein coding RNA 910	DHX8	0.424		protein_coding	DEAH (Asp-Glu-Ala-His) box polypeptide 8		<100kb	no	opposite
RP11-314O13.1	5.606	Solid_ON	lincRNA		CDYL2	0.611		protein_coding	chromodomain protein, Y-like 2		<100kb	no	same
Z83844.1	4.621	Pan_UP	antisense		GGA1	-0.796		protein_coding	golgi-associated, gamma adaptin ear containing, ARF binding protein 1		<100kb	no	opposite
RP11-758P17.3	7.228	Solid_ON	antisense		MEPCE	0.443		protein_coding	methylphosphate capping enzyme		<100kb	no	same
USP2-AS1	2.923	Pan_UP	antisense	USP2 antisense RNA 1 (head to head)	MFRP	0		protein_coding	membrane frizzled-related protein		<100kb	no	opposite
RP11-758P17.3	7.228	Solid_ON	antisense		TSC22D4	-0.302		protein_coding	TSC22 domain family, member 4		<100kb	no	opposite
DGCR5	2.395	Solid_UP	antisense	DiGeorge syndrome critical region gene 5 (non-protein coding)	DGCR6	0.126		protein_coding	DiGeorge syndrome critical region gene 6		<100kb	no	same
MFI2-AS1	2.594	Pan_UP	antisense	MFI2 antisense RNA 1	MFI2	0.252		protein_coding	antigen p97 (melanoma associated) identified by monoclonal antibodies 133.2 and 96.5		<1kb	yes	opposite
RP11-1143G9.2	5.162	Solid_ON	pseudogene		LYZ	0.395		protein_coding	lysozyme		<100kb	no	same
RP11-564D11.3	4.525	Solid_UP	pseudogene		C10orf88	0.584		protein_coding	chromosome 10 open reading frame 88		<100kb	no	opposite
RP11-284F21.7	3.464	Pan_UP	antisense		TTC24	-0.338		protein_coding	tetratricopeptide repeat domain 24		<100kb	no	opposite
Z83844.1	4.621	Pan_UP	antisense		CDC42EP1	-0.677		protein_coding	CDC42 effector protein (Rho GTPase binding) 1		<100kb	no	opposite
PCDHB9	2.656	Pan_UP	pseudogene	protocadherin beta 9	PCDHB10	1.279		protein_coding	protocadherin beta 10		<100kb	no	same
RP11-253M7.1	2.592	Pan_UP	antisense		RPLP1	-0.198		protein_coding	ribosomal protein, large, P1		<100kb	no	opposite
AC074117.10	2.978	Solid_UP	antisense		EIF2B4	0.333		protein_coding	eukaryotic translation initiation factor 2B, subunit 4 delta, 67kDa		<100kb	yes	opposite
RP11-480I12.5	3.343	Pan_UP	pseudogene		ADIPOR1	-0.849		protein_coding	adiponectin receptor 1		<100kb	no	same
RAET1K	6.045	Pan_UP	pseudogene	retinoic acid early transcript 1K pseudogene	RAET1G	-1.714		protein_coding	retinoic acid early transcript 1G		<100kb	no	same
DCLRE1CP1	3.535	Pan_UP	pseudogene	DNA cross-link repair 1C pseudogene 1	RPP38	0.207		protein_coding	ribonuclease P/MRP 38kDa subunit		<100kb	no	opposite
CTD-2521M24.9	3.938	Solid_ON	lincRNA		BST2	2.094		protein_coding	bone marrow stromal cell antigen 2		<1kb	no	opposite
HOXA11-AS	5.083	Pan_UP	antisense	HOXA11 antisense RNA	EVX1	0.721		protein_coding	even-skipped homeobox 1		<100kb	no	same
Z83844.1	4.621	Pan_UP	antisense		PDXP	-0.333		protein_coding	pyridoxal (pyridoxine, vitamin B6) phosphatase		<1kb	no	opposite
RNU1-85P	4.131	Pan_UP	other ncRNAs	RNA, U1 small nuclear 85, pseudogene	RAD51C	0.69		protein_coding	RAD51 paralog C		<100kb	no	opposite
MIR3621	5.257	Solid_UP	other ncRNAs	microRNA 3621	DPP7	-0.282		protein_coding	dipeptidyl-peptidase 7		<100kb	no	same
CTD-2521M24.9	3.938	Solid_ON	lincRNA		DDA1	-0.6		protein_coding	DET1 and DDB1 associated 1		<100kb	no	same
CTD-2521M24.9	3.938	Solid_ON	lincRNA		PLVAP	-5.016		protein_coding	plasmalemma vesicle associated protein		<100kb	no	opposite
MIR3621	5.257	Solid_UP	other ncRNAs	microRNA 3621	TPRN	0.323		protein_coding	taperin		<100kb	no	same
CTC-338M12.9	6.99	Pan_ON	lincRNA		GNB2L1	-1.15		protein_coding	guanine nucleotide binding protein (G protein), beta polypeptide 2-like 1		<100kb	no	opposite
AC104534.2	7.162	Pan_ON	antisense		NFKBIB	3.451		protein_coding	nuclear factor of kappa light polypeptide gene enhancer in B-cells inhibitor, beta		<100kb	no	same
AC068580.7	5.539	Solid_ON	lincRNA		CTSD	-1.548		protein_coding	cathepsin D		<100kb	no	same
CTD-2587H24.5	4.761	Pan_ON	antisense		TMEM86B	-0.354		protein_coding	transmembrane protein 86B		<100kb	no	opposite
AC074117.10	2.978	Solid_UP	antisense		ZNF513	-0.425		protein_coding	zinc finger protein 513		<100kb	no	opposite
RNU5F-1	2.546	Pan_UP	other ncRNAs	RNA, U5F small nuclear 1	RNF220	0.061		protein_coding	ring finger protein 220		<100kb	no	opposite
RNU5D-1	6.889	Solid_ON	other ncRNAs	RNA, U5D small nuclear 1	RNF220	0.061		protein_coding	ring finger protein 220		<100kb	no	opposite
RP11-332J15.3	4.219	Pan_UP	lincRNA		PAPD7	2.737		protein_coding	PAP associated domain containing 7		<100kb	no	same
RP11-284F21.7	3.464	Pan_UP	antisense		ISG20L2	0.296		protein_coding	interferon stimulated exonuclease gene 20kDa-like 2		<100kb	no	same
CTD-2521M24.9	3.938	Solid_ON	lincRNA		ANO8	0.577		protein_coding	anoctamin 8		<100kb	no	opposite
RP11-284F21.7	5.971	Pan_UP	antisense		CRABP2	2.074		protein_coding	cellular retinoic acid binding protein 2		<100kb	no	same
LINC01006	-0.757	Solid_OFF	other ncRNAs	long intergenic non-protein coding RNA 1006	RNF32	0		protein_coding	ring finger protein 32		<1kb	yes	opposite
RP11-89K10.1	3.096	Solid_UP	antisense		FAM84B	2.216		protein_coding	family with sequence similarity 84, member B		<1kb	yes	opposite
CTC-548K16.1	3.806	Solid_ON	lincRNA		PKN1	0.159		protein_coding	protein kinase N1		<100kb	no	same
RP11-480I12.5	3.343	Pan_UP	pseudogene		KLHL12	0.374		protein_coding	kelch-like family member 12		<100kb	no	same
RP4-536B24.4	3.238	Pan_UP	lincRNA		KLHDC4	0.262		protein_coding	kelch domain containing 4		<100kb	no	same
PCDHB9	2.656	Pan_UP	pseudogene	protocadherin beta 9	PCDHB14	1.299		protein_coding	protocadherin beta 14		<100kb	no	same
MIR3621	5.257	Solid_UP	other ncRNAs	microRNA 3621	SSNA1	-0.415		protein_coding	Sjogren syndrome nuclear autoantigen 1		<100kb	no	opposite
USP2-AS1	2.923	Pan_UP	antisense	USP2 antisense RNA 1 (head to head)	RNF26	0.357		protein_coding	ring finger protein 26		<100kb	no	same
MIR3621	5.257	Solid_UP	other ncRNAs	microRNA 3621	RNF208	-1.167		protein_coding	ring finger protein 208		<100kb	no	same
SNORA68	5.001	Solid_ON	other ncRNAs	small nucleolar RNA, H/ACA box 68	EIF2S3	0.731		protein_coding	eukaryotic translation initiation factor 2, subunit 3 gamma, 52kDa		<100kb	no	same
RP11-27K13.3	4.676	Solid_ON	antisense		TRIM45	1.092		protein_coding	tripartite motif containing 45		<100kb	no	same
LINC01006	-0.757	Solid_OFF	other ncRNAs	long intergenic non-protein coding RNA 1006	LMBR1	1.161		protein_coding	limb development membrane protein 1		<100kb	no	same
AL022344.4	5.65	Pan_ON	lincRNA		BMS1	0.791		protein_coding	BMS1 ribosome biogenesis factor		<100kb	no	opposite
RNU6-781P	6.09	Pan_UP	other ncRNAs	RNA, U6 small nuclear 781, pseudogene	MLF2	-0.785		protein_coding	myeloid leukemia factor 2		<100kb	no	opposite
RP11-405F3.4	5.662	Pan_ON	antisense		KATNB1	0.13		protein_coding	katanin p80 (WD repeat containing) subunit B 1		<100kb	no	opposite
AC074117.10	2.978	Solid_UP	antisense		KRTCAP3	-1.194		protein_coding	keratinocyte associated protein 3		<100kb	no	same
RP11-358D14.2	5.261	Solid_ON	antisense		PPDPF	1.733		protein_coding	pancreatic progenitor cell differentiation and proliferation factor		<100kb	no	same
AC074117.10	2.978	Solid_UP	antisense		GTF3C2	0.624		protein_coding	general transcription factor IIIC, polypeptide 2, beta 110kDa		<1kb	yes	opposite
AC009005.2	4.487	Solid_ON	antisense		POLRMT	-0.196		protein_coding	polymerase (RNA) mitochondrial (DNA directed)		<100kb	no	same
LINC00847	-0.969	Solid_OFF	lincRNA	long intergenic non-protein coding RNA 847	ZFP62	0.825		protein_coding	ZFP62 zinc finger protein		<100kb	no	opposite
LINC00243	5.167	Pan_UP	other ncRNAs	long intergenic non-protein coding RNA 243	GTF2H4	0.076		protein_coding	general transcription factor IIH, polypeptide 4, 52kDa		<100kb	no	opposite
AC104534.2	7.162	Pan_ON	antisense		HNRNPL	0.702		protein_coding	heterogeneous nuclear ribonucleoprotein L		<100kb	no	opposite
MCF2L-AS1	3.404	Solid_UP	antisense	MCF2L antisense RNA 1	ATP11A	2.08		protein_coding	ATPase, class VI, type 11A		<100kb	no	opposite
MFI2-AS1	2.594	Pan_UP	antisense	MFI2 antisense RNA 1	SENP5	4.823		protein_coding	SUMO1/sentrin specific peptidase 5		<100kb	no	same
RP11-845M18.6	3.749	Solid_UP	antisense		KRT83	0		protein_coding	keratin 83		<100kb	no	same
RP11-564D11.3	4.525	Solid_UP	pseudogene		CUZD1	0.418		protein_coding	CUB and zona pellucida-like domains 1		<1kb	no	opposite
SMPD4P1	4.783	Pan_ON	pseudogene	sphingomyelin phosphodiesterase 4, neutral membrane (neutral sphingomyelinase-3) pseudogene 1	MED15	0.888		protein_coding	mediator complex subunit 15		<100kb	no	opposite
AC007050.1	4.642	Pan_ON	other ncRNAs		MED15	0.888		protein_coding	mediator complex subunit 15		<100kb	no	same
MNX1-AS1	6.398	Pan_ON	antisense	MNX1 antisense RNA 1 (head to head)	NOM1	0.754		protein_coding	nucleolar protein with MIF4G domain 1		<100kb	no	same
RP4-792G4.2	6.377	Pan_ON	antisense		ALG6	0.301		protein_coding	ALG6, alpha-1,3-glucosyltransferase		<100kb	no	opposite
AC074117.10	2.978	Solid_UP	antisense		MPV17	-0.404		protein_coding	MpV17 mitochondrial inner membrane protein		<100kb	no	opposite
AC004540.5	4.04	Solid_UP	lincRNA		SNX10	0.543		protein_coding	sorting nexin 10		<100kb	no	same
AC009005.2	4.487	Solid_ON	antisense		RNF126	-0.55		protein_coding	ring finger protein 126		<100kb	no	same
CSAG4	7.292	Pan_ON	pseudogene	CSAG family, member 4 (pseudogene)	NSDHL	-1.154		protein_coding	NAD(P) dependent steroid dehydrogenase-like		<100kb	no	opposite
HOXA11-AS	5.083	Pan_UP	antisense	HOXA11 antisense RNA	HOXA1	0.866		protein_coding	homeobox A1		<100kb	no	opposite
RP11-89K21.1	4.756	Solid_ON	lincRNA		SIX3	3.646		protein_coding	SIX homeobox 3		<100kb	no	opposite
RP11-328M4.2	3.093	Pan_UP	antisense		FOXP4	0.416		protein_coding	forkhead box P4		<1kb	yes	opposite
SNHG1	6.654	Pan_ON	other ncRNAs	small nucleolar RNA host gene 1 (non-protein coding)	POLR2G	0.185		protein_coding	polymerase (RNA) II (DNA directed) polypeptide G		<100kb	no	opposite
RP11-284F21.7	3.464	Pan_UP	antisense		MRPL24	0.204		protein_coding	mitochondrial ribosomal protein L24		<100kb	no	same
RP11-98G7.1	6.329	Pan_ON	lincRNA		C1orf61	-0.514		protein_coding	chromosome 1 open reading frame 61		<100kb	no	same
MIR3621	5.257	Solid_UP	other ncRNAs	microRNA 3621	C9orf173	0.511		protein_coding	chromosome 9 open reading frame 173		<100kb	no	opposite
RP11-277B15.3	5.368	Pan_ON	antisense		POU2F1	1.248		protein_coding	POU class 2 homeobox 1		<1kb	no	opposite
AC074117.10	2.978	Solid_UP	antisense		TRIM54	2.843		protein_coding	tripartite motif containing 54		<100kb	no	same
TSPY26P	-2.544	Solid_OFF	pseudogene	testis specific protein, Y-linked 26, pseudogene	POFUT1	0.206		protein_coding	protein O-fucosyltransferase 1		<100kb	no	opposite
CTD-2587H24.5	4.761	Pan_ON	antisense		RDH13	1.395		protein_coding	retinol dehydrogenase 13 (all-trans/9-cis)		<100kb	no	opposite
CTC-559E9.4	-0.118	Pan_OFF	lincRNA		ZNF93	0.119		protein_coding	zinc finger protein 93		<100kb	no	opposite
MIR3621	5.257	Solid_UP	other ncRNAs	microRNA 3621	NDOR1	0.339		protein_coding	NADPH dependent diflavin oxidoreductase 1		<100kb	no	opposite
MIR3621	5.257	Solid_UP	other ncRNAs	microRNA 3621	UAP1L1	0.104		protein_coding	UDP-N-acteylglucosamine pyrophosphorylase 1-like 1		<100kb	no	opposite
AC074389.9	5.648	Solid_ON	lincRNA		MAD1L1	0		protein_coding	MAD1 mitotic arrest deficient-like 1 (yeast)		<100kb	no	same
Z83844.1	4.621	Pan_UP	antisense		NOL12	0.003		protein_coding	nucleolar protein 12		<100kb	no	opposite
RP11-480I12.5	3.343	Pan_UP	pseudogene		RABIF	-0.019		protein_coding	RAB interacting factor		<100kb	no	same
RAET1K	6.045	Pan_UP	pseudogene	retinoic acid early transcript 1K pseudogene	ULBP3	0.032		protein_coding	UL16 binding protein 3		<100kb	no	same
USP2-AS1	2.923	Pan_UP	antisense	USP2 antisense RNA 1 (head to head)	THY1	-2.414		protein_coding	Thy-1 cell surface antigen		<100kb	yes	opposite
AC006262.5	5.684	Solid_ON	lincRNA		IGFL3	-3.563		protein_coding	IGF-like family member 3		<100kb	no	same
CTD-2587H24.5	4.761	Pan_ON	antisense		SYT5	-1.18		protein_coding	synaptotagmin V		<100kb	yes	opposite
RP11-758P17.3	7.228	Solid_ON	antisense		C7orf61	0		protein_coding	chromosome 7 open reading frame 61		<100kb	no	opposite
SNHG1	6.654	Pan_ON	other ncRNAs	small nucleolar RNA host gene 1 (non-protein coding)	TMEM223	0.034		protein_coding	transmembrane protein 223		<100kb	no	same
RP11-284F21.7	3.464	Pan_UP	antisense		BCAN	-0.753		protein_coding	brevican		<100kb	yes	opposite
RP11-284F21.7	3.464	Pan_UP	antisense		APOA1BP	-0.144		protein_coding	apolipoprotein A-I binding protein		<100kb	no	opposite
RP11-1070N10.5	5.903	Solid_ON	lincRNA		SNHG10	0.99		antisense	small nucleolar RNA host gene 10 (non-protein coding)		<100kb	no	opposite
MFI2-AS1	2.594	Pan_UP	antisense	MFI2 antisense RNA 1	NCBP2	0.555		protein_coding	nuclear cap binding protein subunit 2, 20kDa		<100kb	no	opposite
MIR3621	5.257	Solid_UP	other ncRNAs	microRNA 3621	MAN1B1	-0.2		protein_coding	mannosidase, alpha, class 1B, member 1		<100kb	no	opposite
RP11-284F21.7	3.464	Pan_UP	antisense		GPATCH4	1.044		protein_coding	G patch domain containing 4		<100kb	no	same
AC009005.2	4.487	Solid_ON	antisense		CDC34	0.829		protein_coding	cell division cycle 34		<100kb	no	opposite
RP11-57A19.2	4.966	Pan_UP	lincRNA		XPO6	-0.099		protein_coding	exportin 6		<100kb	no	same
CTC-308K20.1	2.832	Solid_UP	antisense		RPL26L1	0.314		protein_coding	ribosomal protein L26-like 1		<1kb	yes	opposite
DISC1FP1	7.123	Solid_UP	other ncRNAs	DISC1 fusion partner 1 (non-protein coding)	CHORDC1	0.952		protein_coding	cysteine and histidine-rich domain (CHORD) containing 1		<100kb	no	opposite
RP4-785G19.5	3.784	Pan_UP	other ncRNAs		AHCY	-0.024		protein_coding	adenosylhomocysteinase		<100kb	yes	same
RP11-358D14.2	5.261	Solid_ON	antisense		PTK6	3.147		protein_coding	protein tyrosine kinase 6		<100kb	no	opposite
TSPY26P	-2.544	Solid_OFF	pseudogene	testis specific protein, Y-linked 26, pseudogene	TM9SF4	0.289		protein_coding	transmembrane 9 superfamily protein member 4		<100kb	no	opposite
RP11-480I12.5	3.343	Pan_UP	pseudogene		KDM5B	-0.305		protein_coding	lysine (K)-specific demethylase 5B		<100kb	no	same
RP11-438N16.1	5.38	Pan_ON	lincRNA		RBM19	1.022		protein_coding	RNA binding motif protein 19		<100kb	no	same
CTD-2587H24.5	4.761	Pan_ON	antisense		PTPRH	2.218		protein_coding	protein tyrosine phosphatase, receptor type, H		<100kb	no	opposite
SNHG1	6.654	Pan_ON	other ncRNAs	small nucleolar RNA host gene 1 (non-protein coding)	SLC3A2	-0.116		protein_coding	solute carrier family 3 (amino acid transporter heavy chain), member 2		<1kb	no	opposite
RP11-54O7.16	3.939	Pan_UP	lincRNA		NOC2L	-0.183		protein_coding	nucleolar complex associated 2 homolog (S. cerevisiae)		<100kb	no	opposite
RP11-363E7.3	4.286	Pan_ON	pseudogene		SLC24A2	0.083		protein_coding	solute carrier family 24 (sodium/potassium/calcium exchanger), member 2		<100kb	no	same
SCARNA14	3.91	Solid_ON	other ncRNAs	small Cajal body-specific RNA 14	TIPIN	0.584		protein_coding	TIMELESS interacting protein		<100kb	yes	same
RHPN1-AS1	3.183	Pan_UP	antisense	RHPN1 antisense RNA 1 (head to head)	ZNF696	0.959		protein_coding	zinc finger protein 696		<100kb	no	opposite
CSAG4	7.292	Pan_ON	pseudogene	CSAG family, member 4 (pseudogene)	GABRQ	2.873		protein_coding	gamma-aminobutyric acid (GABA) A receptor, theta		<100kb	no	opposite
AC074117.10	2.978	Solid_UP	antisense		SLC30A3	2.409		protein_coding	solute carrier family 30 (zinc transporter), member 3		<100kb	no	opposite
RP11-89K21.1	4.756	Solid_ON	lincRNA		SIX2	0.539		protein_coding	SIX homeobox 2		<100kb	no	same
LINC00511	3.962	Solid_UP	lincRNA	long intergenic non-protein coding RNA 511	SLC39A11	0.873		protein_coding	solute carrier family 39, member 11		<100kb	no	same
RP4-724E16.2	-2.622	Solid_DOWN	antisense		ZNF217	0.555		protein_coding	zinc finger protein 217		<100kb	yes	opposite
RP11-284F21.7	3.464	Pan_UP	antisense		HDGF	0.593		protein_coding	hepatoma-derived growth factor		<100kb	no	same
AC074117.10	2.978	Solid_UP	antisense		PPM1G	0.142		protein_coding	protein phosphatase, Mg2+/Mn2+ dependent, 1G		<100kb	no	opposite
MIR548T	3.949	Solid_ON	other ncRNAs	microRNA 548t	GALNT7	0.231		protein_coding	UDP-N-acetyl-alpha-D-galactosamine:polypeptide N-acetylgalactosaminyltransferase 7 (GalNAc-T7)		<100kb	yes	same
RP11-27K13.3	4.676	Solid_ON	antisense		PTGFRN	-0.441		protein_coding	prostaglandin F2 receptor inhibitor		<100kb	no	opposite
TSPY26P	-2.544	Solid_OFF	pseudogene	testis specific protein, Y-linked 26, pseudogene	PLAGL2	0.831		protein_coding	pleiomorphic adenoma gene-like 2		<100kb	no	same
Z83844.1	4.621	Pan_UP	antisense		SH3BP1	-1.004		protein_coding	SH3-domain binding protein 1		<100kb	yes	opposite
RHPN1-AS1	3.183	Pan_UP	antisense	RHPN1 antisense RNA 1 (head to head)	ZC3H3	-0.501		protein_coding	zinc finger CCCH-type containing 3		<100kb	no	same
CTC-453G23.8	4.711	Solid_UP	antisense		ZNF114	1.999		protein_coding	zinc finger protein 114		<100kb	yes	same
AC104534.2	7.162	Pan_ON	antisense		CAPN12	-1.583		protein_coding	calpain 12		<100kb	no	opposite
AC104534.2	7.162	Pan_ON	antisense		LGALS7B	-1.159		protein_coding	lectin, galactoside-binding, soluble, 7B		<100kb	no	same
MIR3621	5.257	Solid_UP	other ncRNAs	microRNA 3621	GRIN1	0.443		protein_coding	glutamate receptor, ionotropic, N-methyl D-aspartate 1		<1kb	no	opposite
SDHAP3	2.695	Solid_UP	pseudogene	succinate dehydrogenase complex, subunit A, flavoprotein pseudogene 3	LPCAT1	0.703		protein_coding	lysophosphatidylcholine acyltransferase 1		<100kb	no	same
LINC00243	5.167	Pan_UP	other ncRNAs	long intergenic non-protein coding RNA 243	DDR1	-0.52		protein_coding	discoidin domain receptor tyrosine kinase 1		<100kb	no	opposite
MIR3621	5.257	Solid_UP	other ncRNAs	microRNA 3621	C9orf169	4.156		protein_coding	chromosome 9 open reading frame 169		<100kb	no	opposite
LINC00243	5.167	Pan_UP	other ncRNAs	long intergenic non-protein coding RNA 243	TUBB	-0.365		protein_coding	tubulin, beta class I		<100kb	no	opposite
RP11-758P17.3	7.228	Solid_ON	antisense		PILRB	1.84		protein_coding	paired immunoglobin-like type 2 receptor beta		<100kb	no	same
RP11-845M18.6	3.749	Solid_UP	antisense		KRT81	0		protein_coding	keratin 81		<100kb	no	same
RP11-54O7.16	3.939	Pan_UP	lincRNA		HES4	2.759		protein_coding	hes family bHLH transcription factor 4		<100kb	no	opposite
RAET1K	6.045	Pan_UP	pseudogene	retinoic acid early transcript 1K pseudogene	RAET1L	0.567		protein_coding	retinoic acid early transcript 1L		<100kb	no	same
RP11-159H10.3	5.645	Solid_UP	antisense		SLCO5A1	3.283		protein_coding	solute carrier organic anion transporter family, member 5A1		<1kb	yes	opposite
RP11-27K13.3	4.676	Solid_ON	antisense		TTF2	1.047		protein_coding	transcription termination factor, RNA polymerase II		<1kb	no	opposite
SMPD4P1	4.783	Pan_ON	pseudogene	sphingomyelin phosphodiesterase 4, neutral membrane (neutral sphingomyelinase-3) pseudogene 1	TMEM191A	-0.431		other ncRNAs	transmembrane protein 191A (pseudogene)		<100kb	no	opposite
AC007050.1	4.642	Pan_ON	other ncRNAs		TMEM191A	-0.431		other ncRNAs	transmembrane protein 191A (pseudogene)		<100kb	no	same
RNU6-781P	6.09	Pan_UP	other ncRNAs	RNA, U6 small nuclear 781, pseudogene	LPAR5	-0.063		protein_coding	lysophosphatidic acid receptor 5		<100kb	no	opposite
AC079135.1	4.78	Pan_UP	antisense		GBX2	6.451		protein_coding	gastrulation brain homeobox 2		<1kb	yes	opposite
RHPN1-AS1	3.183	Pan_UP	antisense	RHPN1 antisense RNA 1 (head to head)	TOP1MT	1.152		protein_coding	topoisomerase (DNA) I, mitochondrial		<100kb	no	same
MSL3P1	0.887	Solid_OFF	pseudogene	male-specific lethal 3 homolog (Drosophila) pseudogene 1	TRPM8	5.596		protein_coding	transient receptor potential cation channel, subfamily M, member 8		<100kb	no	opposite
CTD-2521M24.9	3.938	Solid_ON	lincRNA		GTPBP3	0.623		protein_coding	GTP binding protein 3 (mitochondrial)		<100kb	no	same
AC006262.5	5.684	Solid_ON	lincRNA		IGFL1	4.001		protein_coding	IGF-like family member 1		<100kb	no	opposite
RP11-405F3.4	5.662	Pan_ON	antisense		GPR56	0.708		protein_coding	G protein-coupled receptor 56		<100kb	no	opposite
RP11-54O7.16	3.939	Pan_UP	lincRNA		KLHL17	0.291		protein_coding	kelch-like family member 17		<100kb	no	same
RP11-845M18.6	3.749	Solid_UP	antisense		KRT86	5.83		protein_coding	keratin 86		<100kb	yes	opposite
HOXA11-AS	5.083	Pan_UP	antisense	HOXA11 antisense RNA	HOXA10	0.989		protein_coding	homeobox A10		<100kb	no	opposite
AC009005.2	4.487	Solid_ON	antisense		HCN2	-0.001		protein_coding	hyperpolarization activated cyclic nucleotide-gated potassium channel 2		<100kb	no	opposite
RP11-358D14.2	5.261	Solid_ON	antisense		SRMS	-0.492		protein_coding	src-related kinase lacking C-terminal regulatory tyrosine and N-terminal myristylation sites		<100kb	no	opposite
CTC-453G23.8	4.711	Solid_UP	antisense		LIG1	0.538		protein_coding	ligase I, DNA, ATP-dependent		<100kb	no	opposite
RP11-328M4.2	3.093	Pan_UP	antisense		MDFI	-1.646		protein_coding	MyoD family inhibitor		<100kb	no	opposite
AC104135.3	6.026	Solid_UP	lincRNA		HK2	0.479		protein_coding	hexokinase 2		<100kb	no	same
FEZF1-AS1	7.318	Solid_ON	antisense	FEZF1 antisense RNA 1	FEZF1	5.414		protein_coding	FEZ family zinc finger 1		<1kb	yes	opposite
RP11-108M9.4	-0.607	Solid_OFF	lincRNA		MFAP2	-1.297		protein_coding	microfibrillar-associated protein 2		<100kb	no	same
RAET1K	6.045	Pan_UP	pseudogene	retinoic acid early transcript 1K pseudogene	ULBP1	0.327		protein_coding	UL16 binding protein 1		<100kb	no	opposite
RP4-536B24.4	3.238	Pan_UP	lincRNA		SLC7A5	1.237		protein_coding	solute carrier family 7 (amino acid transporter light chain, L system), member 5		<100kb	no	same
RP11-54O7.16	3.939	Pan_UP	lincRNA		C1orf170	1.135		protein_coding	chromosome 1 open reading frame 170		<100kb	no	opposite
CTD-2587H24.5	4.761	Pan_ON	antisense		TNNI3	1.241		protein_coding	troponin I type 3 (cardiac)		<100kb	no	opposite
RAET1K	6.045	Pan_UP	pseudogene	retinoic acid early transcript 1K pseudogene	ULBP2	-0.183		protein_coding	UL16 binding protein 2		<100kb	no	opposite
DLX6-AS2	5.716	Solid_ON	antisense	DLX6 antisense RNA 2	DLX5	4.028		protein_coding	distal-less homeobox 5		<100kb	no	same
AC006262.5	5.684	Solid_ON	lincRNA		IGFL2	0.505		protein_coding	IGF-like family member 2		<100kb	no	opposite
RP11-54O7.16	3.939	Pan_UP	lincRNA		PLEKHN1	0.137		protein_coding	pleckstrin homology domain containing, family N member 1		<100kb	no	same
RNU5D-1	6.889	Solid_ON	other ncRNAs	RNA, U5D small nuclear 1	KIF2C	1.559		protein_coding	kinesin family member 2C		<100kb	no	opposite
RNU5F-1	2.546	Pan_UP	other ncRNAs	RNA, U5F small nuclear 1	KIF2C	1.559		protein_coding	kinesin family member 2C		<100kb	no	opposite
MSL3P1	0.887	Solid_OFF	pseudogene	male-specific lethal 3 homolog (Drosophila) pseudogene 1	HJURP	1.868		protein_coding	Holliday junction recognition protein		<100kb	no	same
RP11-284F21.7	5.971	Pan_UP	antisense		IQGAP3	2.251		protein_coding	IQ motif containing GTPase activating protein 3		<100kb	no	same
RP11-98G7.1	6.329	Pan_ON	lincRNA		IQGAP3	0		protein_coding	IQ motif containing GTPase activating protein 3		<100kb	no	same
RP11-108M9.4	-0.607	Solid_OFF	lincRNA		RP11-108M9.6	1.703		lincRNA			<100kb	no	same
RNU5F-1	2.546	Pan_UP	other ncRNAs	RNA, U5F small nuclear 1	RP11-269F19.2	0.493		antisense			<100kb	no	same
RNU5D-1	6.889	Solid_ON	other ncRNAs	RNA, U5D small nuclear 1	RP11-269F19.2	0.493		antisense			<100kb	no	same
RP4-665J23.1	2.656	Pan_UP	lincRNA		RP4-665J23.4	3.712		lincRNA			<100kb	no	same
AC068580.7	5.539	Solid_ON	lincRNA		IFITM10	-0.407		protein_coding	interferon induced transmembrane protein 10		<100kb	no	same
AC068580.7	5.539	Solid_ON	lincRNA		RP11-295K3.1	-0.796		protein_coding			<100kb	no	same
RP4-536B24.4	3.238	Pan_UP	lincRNA		RP4-536B24.2	0		antisense			<100kb	no	opposite
LINC00910	3.151	Solid_UP	lincRNA	long intergenic non-protein coding RNA 910	LINC00854	1.078		other ncRNAs	long intergenic non-protein coding RNA 854		<100kb	no	same
RNU1-85P	4.131	Pan_UP	other ncRNAs	RNA, U1 small nuclear 85, pseudogene	U3	2.884		other ncRNAs			<100kb	no	same
RNU1-85P	4.131	Pan_UP	other ncRNAs	RNA, U1 small nuclear 85, pseudogene	RNU1-108P	1.942		other ncRNAs	RNA, U1 small nuclear 108, pseudogene		<100kb	no	same
CTC-559E9.4	-0.118	Pan_OFF	lincRNA		CTC-559E9.6	1.042		other ncRNAs			<1kb	yes	opposite
AC006262.5	5.684	Solid_ON	lincRNA		AC006262.4	1.906		lincRNA			<100kb	no	same
AC006262.5	5.684	Solid_ON	lincRNA		RPL12P41	-0.55		pseudogene	ribosomal protein L12 pseudogene 41		<100kb	no	opposite
AC006262.5	5.684	Solid_ON	lincRNA		IGFL1P2	1.505		pseudogene	IGF-like family member 1 pseudogene 2		<100kb	no	same
AC009005.2	4.487	Solid_ON	antisense		AC005775.2	1.718		antisense			<100kb	no	same
CTD-2587H24.5	4.761	Pan_ON	antisense		PPP6R1	-0.473		protein_coding	protein phosphatase 6, regulatory subunit 1		<100kb	no	opposite
CTA-714B7.5	6.844	Pan_UP	lincRNA		RP3-510H16.3	0		antisense			<100kb	no	same
CTC-338M12.9	6.99	Pan_ON	lincRNA		TRIM52-AS1	-0.921		antisense	TRIM52 antisense RNA 1 (head to head)		<100kb	no	same
AC004540.5	4.04	Solid_UP	lincRNA		AC004540.4	2.728		antisense			<100kb	no	opposite
MIR3621	5.257	Solid_UP	other ncRNAs	microRNA 3621	TUBB4B	-0.669		protein_coding	tubulin, beta 4B class IVb		<100kb	no	opposite
RP11-435O5.2	3.149	Pan_UP	lincRNA		RP11-435O5.6	2.378		antisense			<100kb	no	opposite
LINC00221	6.126	Solid_ON	lincRNA	long intergenic non-protein coding RNA 221	IGHV4-39	0		other ncRNAs	immunoglobulin heavy variable 4-39		<100kb	no	opposite
LINC00221	6.126	Solid_ON	lincRNA	long intergenic non-protein coding RNA 221	IGHV3-49	0		other ncRNAs	immunoglobulin heavy variable 3-49		<100kb	no	opposite
RP11-363E7.3	4.286	Pan_ON	pseudogene		RP11-363E7.4	-0.966		other ncRNAs			<100kb	no	opposite
LINC00662	3.483	Pan_UP	lincRNA	long intergenic non-protein coding RNA 662	CTC-459F4.3	0.552		lincRNA			<1kb	yes	opposite
LINC00221	6.126	Solid_ON	lincRNA	long intergenic non-protein coding RNA 221	IGHV5-51	0		other ncRNAs	immunoglobulin heavy variable 5-51		<100kb	no	opposite
RP1-90G24.10	4.728	Solid_UP	antisense		AP1B1P1	1.456		pseudogene	adaptor-related protein complex 1, beta 1 subunit pseudogene 1		<100kb	no	same
ARHGEF26-AS1	3.224	Pan_UP	other ncRNAs	ARHGEF26 antisense RNA 1	ARHGEF26	0.101		protein_coding	Rho guanine nucleotide exchange factor (GEF) 26		<1kb	yes	opposite
RP11-435O5.2	3.149	Pan_UP	lincRNA		RP11-435O5.5	-0.136		antisense			<100kb	no	opposite
RNU6-781P	6.09	Pan_UP	other ncRNAs	RNA, U6 small nuclear 781, pseudogene	PIANP	1.259		protein_coding	PILR alpha associated neural protein		<100kb	no	opposite
CTD-2587H24.5	4.761	Pan_ON	antisense		DNAAF3	0.955		protein_coding	dynein, axonemal, assembly factor 3		<1kb	yes	opposite
CTC-308K20.1	2.832	Solid_UP	antisense		CREBRF	1.09		protein_coding	CREB3 regulatory factor		<100kb	no	opposite
RNU2-64P	3.891	Pan_UP	other ncRNAs	RNA, U2 small nuclear 64, pseudogene	CCDC75P1	0.701		pseudogene	coiled-coil domain containing 75 pseudogene 1		<100kb	no	opposite
RP4-680D5.2	4.498	Solid_UP	antisense		CHCHD2P6	0.296		pseudogene	coiled-coil-helix-coiled-coil-helix domain containing 2 pseudogene 6		<1kb	no	opposite
MIR3621	5.257	Solid_UP	other ncRNAs	microRNA 3621	NELFB	-0.26		protein_coding	negative elongation factor complex member B		<100kb	no	opposite
CTC-548K16.1	3.806	Solid_ON	lincRNA		DDX39A	0.136		protein_coding	DEAD (Asp-Glu-Ala-Asp) box polypeptide 39A		<100kb	no	opposite
RP11-475N22.4	3.687	Solid_ON	antisense		DNAJB8-AS1	0		antisense	DNAJB8 antisense RNA 1		<100kb	no	same
AC018890.6	3.852	Pan_ON	antisense		AC010894.4	-0.629		pseudogene			<100kb	no	same
RP11-390F4.6	3.072	Pan_UP	lincRNA		RP11-106A1.2	0.506		pseudogene			<100kb	no	same
RNU1-122P	3.682	Pan_UP	other ncRNAs	RNA, U1 small nuclear 122, pseudogene	RNU1-120P	0.214		other ncRNAs	RNA, U1 small nuclear 120, pseudogene		<100kb	no	opposite
RNU1-85P	4.131	Pan_UP	other ncRNAs	RNA, U1 small nuclear 85, pseudogene	RNU1-60P	1.953		other ncRNAs	RNA, U1 small nuclear 60, pseudogene		<100kb	no	same
RP11-344E13.3	6.372	Pan_ON	antisense		OLA1P2	1.354		pseudogene	Obg-like ATPase 1 pseudogene 2		<100kb	no	same
RP11-54O7.16	3.939	Pan_UP	lincRNA		RP11-206L10.11	0.537		other ncRNAs			<100kb	no	same
RNU1-122P	3.682	Pan_UP	other ncRNAs	RNA, U1 small nuclear 122, pseudogene	RP11-301M17.1	-2.058		pseudogene			<100kb	no	opposite
AC018890.6	3.852	Pan_ON	antisense		AC010894.3	0.584		lincRNA			<100kb	no	same
RP11-480I12.5	3.343	Pan_UP	pseudogene		PCAT6	0.173		antisense	prostate cancer associated transcript 6 (non-protein coding)		<100kb	no	opposite
RP11-89K21.1	4.756	Solid_ON	lincRNA		SIX3-AS1	2.813		antisense	SIX3 antisense RNA 1		<100kb	no	same
RP11-89K21.1	4.756	Solid_ON	lincRNA		AC012354.8	0.192		pseudogene			<100kb	no	opposite
RP11-277B15.3	5.368	Pan_ON	antisense		RP11-277B15.2	0.534		antisense			<100kb	no	same
RP11-480I12.5	3.343	Pan_UP	pseudogene		RP11-480I12.2	0.794		pseudogene			<100kb	no	same
RP11-480I12.5	3.343	Pan_UP	pseudogene		HNRNPA1P59	0.481		pseudogene	heterogeneous nuclear ribonucleoprotein A1 pseudogene 59		<100kb	no	opposite
RP11-564D11.3	4.525	Solid_UP	pseudogene		RP11-107C16.2	0		pseudogene			<100kb	no	same
AC068580.7	5.539	Solid_ON	lincRNA		RPL36AP39	0.75		pseudogene	ribosomal protein L36a pseudogene 39		<100kb	no	opposite
AC068580.7	5.539	Solid_ON	lincRNA		AC068580.6	0.54		antisense			<100kb	no	opposite
RP11-277B15.3	5.368	Pan_ON	antisense		RP11-277B15.1	0.511		pseudogene			<100kb	no	same
RNU5D-1	6.889	Solid_ON	other ncRNAs	RNA, U5D small nuclear 1	RPS15AP11	0.092		pseudogene	ribosomal protein S15a pseudogene 11		<100kb	no	same
RNU5F-1	2.546	Pan_UP	other ncRNAs	RNA, U5F small nuclear 1	RPS15AP11	0.092		pseudogene	ribosomal protein S15a pseudogene 11		<100kb	no	same
MFI2-AS1	2.594	Pan_UP	antisense	MFI2 antisense RNA 1	AC011322.1	0.658		pseudogene			<100kb	no	opposite
HOXA11-AS	5.083	Pan_UP	antisense	HOXA11 antisense RNA	RP1-170O19.20	0.677		protein_coding			<100kb	no	opposite
RP5-884M6.1	7.561	Solid_ON	lincRNA		CTB-111H14.1	0		other ncRNAs			<100kb	no	opposite
ZNF667-AS1	-1.531	Solid_OFF	lincRNA	ZNF667 antisense RNA 1 (head to head)	AC007228.11	-1.378		antisense			<100kb	no	opposite
MIR548T	3.949	Solid_ON	other ncRNAs	microRNA 548t	RP11-10K16.1	0.993		antisense			<100kb	no	opposite
CTC-338M12.9	6.99	Pan_ON	lincRNA		CTC-338M12.4	1.613		antisense			<100kb	no	same
CTC-338M12.9	6.99	Pan_ON	lincRNA		CTC-338M12.5	1.099		antisense			<100kb	no	same
RHPN1-AS1	3.183	Pan_UP	antisense	RHPN1 antisense RNA 1 (head to head)	RP13-582O9.5	1.255		antisense			<100kb	no	same
HOXA11-AS	5.083	Pan_UP	antisense	HOXA11 antisense RNA	HOXA-AS2	-0.772		antisense	HOXA cluster antisense RNA 2		<100kb	no	same
HOXA11-AS	5.083	Pan_UP	antisense	HOXA11 antisense RNA	HOXA-AS3	-0.677		antisense	HOXA cluster antisense RNA 3		<100kb	no	same
HOXA11-AS	5.083	Pan_UP	antisense	HOXA11 antisense RNA	EVX1-AS	0.623		antisense	EVX1 antisense RNA		<100kb	no	opposite
HOXA11-AS	5.083	Pan_UP	antisense	HOXA11 antisense RNA	HOXA-AS4	-0.999		antisense			<100kb	no	same
CTD-2521M24.9	3.938	Solid_ON	lincRNA		CTD-2521M24.4	1.585		pseudogene			<100kb	yes	opposite
DISC1FP1	7.123	Solid_UP	other ncRNAs	DISC1 fusion partner 1 (non-protein coding)	RP11-121L10.3	0.36		pseudogene			<100kb	yes	same
RP11-166D19.1	-2.793	Solid_OFF	other ncRNAs		RP11-820L6.1	0.194		other ncRNAs			<100kb	no	same
LINC01059	3.265	Solid_ON	lincRNA	long intergenic non-protein coding RNA 1059	AP000783.1	2.648		protein_coding			<100kb	no	same
RP11-845M18.6	3.749	Solid_UP	antisense		RP3-416H24.4	-1.756		antisense			<100kb	no	opposite
RP11-1070N10.5	5.903	Solid_ON	lincRNA		RP11-164H13.1	0.945		antisense			<100kb	no	same
RP1-46F2.3	3.479	Solid_ON	lincRNA		RP1-46F2.2	0.6		lincRNA			<100kb	yes	opposite
RP11-1143G9.2	5.162	Solid_ON	pseudogene		RP11-1143G9.4	0.825		antisense			<100kb	no	opposite
RP11-1070N10.5	5.903	Solid_ON	lincRNA		RP11-1070N10.4	0		lincRNA			<100kb	no	same
CTD-2521M24.9	3.938	Solid_ON	lincRNA		MVB12A	-0.73		protein_coding	multivesicular body subunit 12A		<100kb	yes	same
DLGAP1-AS2	2.309	Pan_UP	antisense	DLGAP1 antisense RNA 2	DLGAP1-AS1	1.03		antisense	DLGAP1 antisense RNA 1		<100kb	no	same
RP11-874J12.4	4.482	Pan_ON	antisense		DLGAP1-AS1	1.03		antisense	DLGAP1 antisense RNA 1		<100kb	no	same
AC074117.10	2.978	Solid_UP	antisense		FTH1P3	-1.073		pseudogene	ferritin, heavy polypeptide 1 pseudogene 3		<100kb	no	opposite
MSL3P1	0.887	Solid_OFF	pseudogene	male-specific lethal 3 homolog (Drosophila) pseudogene 1	MROH2A	0.914		protein_coding	maestro heat-like repeat family member 2A		<100kb	no	opposite
HOXA11-AS	5.083	Pan_UP	antisense	HOXA11 antisense RNA	HOTAIRM1	0.617		antisense	HOXA transcript antisense RNA, myeloid-specific 1		<100kb	no	same
HOXA11-AS	5.083	Pan_UP	antisense	HOXA11 antisense RNA	HOTTIP	3.226		antisense	HOXA distal transcript antisense RNA		<100kb	no	same
LINC00221	6.126	Solid_ON	lincRNA	long intergenic non-protein coding RNA 221	IGHV1-45	0		other ncRNAs	immunoglobulin heavy variable 1-45		<100kb	yes	opposite
LINC00221	6.126	Solid_ON	lincRNA	long intergenic non-protein coding RNA 221	IGHV1-46	-1.341		other ncRNAs	immunoglobulin heavy variable 1-46		<100kb	yes	opposite
LINC00221	6.126	Solid_ON	lincRNA	long intergenic non-protein coding RNA 221	IGHV3-35	0		other ncRNAs	immunoglobulin heavy variable 3-35 (non-functional)		<100kb	no	opposite
LINC00221	6.126	Solid_ON	lincRNA	long intergenic non-protein coding RNA 221	IGHV3-48	-0.84		other ncRNAs	immunoglobulin heavy variable 3-48		<100kb	no	opposite
RP11-54O7.16	3.939	Pan_UP	lincRNA		LINC00115	0.732		lincRNA	long intergenic non-protein coding RNA 115		<100kb	no	opposite
LINC01058	4.103	Pan_UP	lincRNA	long intergenic non-protein coding RNA 1058	LINC00426	-0.168		lincRNA	long intergenic non-protein coding RNA 426		<100kb	no	same
RP4-792G4.2	6.377	Pan_ON	antisense		LINC00466	2.397		lincRNA	long intergenic non-protein coding RNA 466		<100kb	no	same
DCLRE1CP1	3.535	Pan_UP	pseudogene	DNA cross-link repair 1C pseudogene 1	PPIAP30	0.24		pseudogene	peptidylprolyl isomerase A (cyclophilin A) pseudogene 30		<100kb	no	same
AC074117.10	2.978	Solid_UP	antisense		AC109828.1	0		antisense			<100kb	no	same
CTC-453G23.8	4.711	Solid_UP	antisense		CTC-241F20.3	-0.085		antisense			<100kb	no	same
RP11-480I12.5	3.343	Pan_UP	pseudogene		RP11-480I12.7	1.395		lincRNA			<1kb	no	opposite
MFI2-AS1	2.594	Pan_UP	antisense	MFI2 antisense RNA 1	NCBP2-AS2	0.336		lincRNA	NCBP2 antisense RNA 2 (head to head)		<100kb	no	same
CTC-559E9.4	-0.118	Pan_OFF	lincRNA		LINC00663	-0.262		lincRNA	long intergenic non-protein coding RNA 663		<100kb	yes	same
ZNF667-AS1	-1.531	Solid_OFF	lincRNA	ZNF667 antisense RNA 1 (head to head)	ZNF582-AS1	-0.825		lincRNA	ZNF582 antisense RNA 1 (head to head)		<100kb	no	same
RP11-166D19.1	-2.793	Solid_OFF	other ncRNAs		MIR100	-0.253		other ncRNAs	microRNA 100		<100kb	no	same
RP11-166D19.1	-2.793	Solid_OFF	other ncRNAs		MIR125B1	-1.227		other ncRNAs	microRNA 125b-1		<1kb	yes	same
CTC-338M12.9	6.99	Pan_ON	lincRNA		MIR4638	3.283		other ncRNAs	microRNA 4638		<100kb	no	opposite
CTD-2521M24.9	3.938	Solid_ON	lincRNA		CTD-2521M24.10	1.549		protein_coding			<100kb	no	opposite
RNU5F-1	2.546	Pan_UP	other ncRNAs	RNA, U5F small nuclear 1	RNU5E-6P	0.365		other ncRNAs	RNA, U5E small nuclear 6, pseudogene		<100kb	no	same
RNU5D-1	6.889	Solid_ON	other ncRNAs	RNA, U5D small nuclear 1	RNU5E-6P	0.365		other ncRNAs	RNA, U5E small nuclear 6, pseudogene		<100kb	no	same
HOXA11-AS	5.083	Pan_UP	antisense	HOXA11 antisense RNA	RPL35P4	0.042		pseudogene	ribosomal protein L35 pseudogene 4		<100kb	no	opposite
RP11-284F21.7	3.464	Pan_UP	antisense		RRNAD1	0.389		protein_coding	ribosomal RNA adenine dimethylase domain containing 1		<100kb	no	opposite
RP11-344E13.3	8.288	Pan_ON	antisense		SCDP1	-0.689		pseudogene	stearoyl-CoA desaturase (delta-9-desaturase) pseudogene 1		<100kb	no	same
MIR3621	5.257	Solid_UP	other ncRNAs	microRNA 3621	RP11-350O14.18	0		other ncRNAs			<100kb	yes	same
CTD-2521M24.9	3.938	Solid_ON	lincRNA		TMEM221	2.616		protein_coding	transmembrane protein 221		<100kb	no	opposite
AC009005.2	4.487	Solid_ON	antisense		TPGS1	-0.767		protein_coding	tubulin polyglutamylase complex subunit 1		<100kb	no	opposite
LINC01058	4.103	Pan_UP	lincRNA	long intergenic non-protein coding RNA 1058	UBE2L5P	0.963		pseudogene	ubiquitin-conjugating enzyme E2L 5 (pseudogene)		<100kb	no	opposite
RP11-124N14.3	-2.325	Solid_DOWN	antisense		VIM-AS1	-1.114		antisense	VIM antisense RNA 1		<100kb	no	same
LINC00839	2.811	Pan_UP	lincRNA	long intergenic non-protein coding RNA 839	ZNF37BP	1.191		pseudogene	zinc finger protein 37B, pseudogene		<100kb	no	opposite
RP11-390F4.6	3.072	Pan_UP	lincRNA		RP11-390F4.3	2.109		lincRNA			<100kb	no	same
RP11-725P16.2	3.636	Solid_UP	lincRNA		ANKRD30BL	-1.346		protein_coding	ankyrin repeat domain 30B-like		<100kb	no	same
RP11-89K10.1	3.096	Solid_UP	antisense		RP11-103H7.5	2.672		antisense			<100kb	no	same
RP11-845M18.6	3.749	Solid_UP	antisense		C12orf80	0		lincRNA	chromosome 12 open reading frame 80		<100kb	no	same
MIR3621	5.257	Solid_UP	other ncRNAs	microRNA 3621	AL807752.1	-0.446		protein_coding			<100kb	no	same
RNA5SP18	3.586	Solid_ON	other ncRNAs	RNA, 5S ribosomal pseudogene 18	DUSP5P1	-0.457		pseudogene	dual specificity phosphatase 5 pseudogene 1		<1kb	yes	opposite
AC008440.10	5.848	Solid_ON	lincRNA		AC008753.6	3.935		antisense			<100kb	yes	opposite
RP11-159D12.2	4.299	Solid_UP	lincRNA		RP11-159D12.5	0.372		protein_coding			<100kb	yes	same
DLX6-AS2	5.157	Solid_ON	antisense	DLX6 antisense RNA 2	DLX6-AS1	-0.919		antisense	DLX6 antisense RNA 1		<100kb	yes	same
AC008440.10	5.848	Solid_ON	lincRNA		AC008753.3	-0.249		pseudogene			<100kb	no	same
RP11-159D12.2	4.299	Solid_UP	lincRNA		RP11-159D12.10	2.31		lincRNA			<100kb	no	same
AC008440.10	5.848	Solid_ON	lincRNA		MIR371A	-0.825		other ncRNAs	microRNA 371a		<100kb	no	same
LAMTOR5-AS1	4.065	Solid_UP	antisense	LAMTOR5 antisense RNA 1	RP5-1074L1.1	0.01		antisense			<100kb	no	opposite
RP5-991G20.1	3.55	Pan_UP	antisense		AC004158.2	1.485		lincRNA			<100kb	no	opposite
RP5-991G20.1	3.55	Pan_UP	antisense		AC004943.1	0.687		other ncRNAs			<100kb	no	opposite
LRRC37A4P	3.602	Solid_ON	pseudogene	leucine rich repeat containing 37, member A4, pseudogene	RP11-707O23.5	0		pseudogene			<100kb	no	same
AC104534.2	7.162	Pan_ON	antisense		CTC-360G5.1	0		protein_coding			<100kb	no	opposite
AC079767.4	5.874	Pan_ON	lincRNA		MIR4775	0.678		other ncRNAs	microRNA 4775		<100kb	no	same
CTD-2152M20.2	4.555	Pan_UP	antisense		CTD-2186M15.3	0.537		lincRNA			<100kb	no	opposite
LINC00243	5.03	Pan_ON	other ncRNAs	long intergenic non-protein coding RNA 243	XXbac-BPG252P9.10	3.754		antisense			<100kb	no	opposite
LINC00243	5.167	Pan_UP	other ncRNAs	long intergenic non-protein coding RNA 243	HCG20	-1.806		lincRNA	HLA complex group 20 (non-protein coding)		<100kb	no	opposite
LINC00669	4.454	Pan_ON	lincRNA	long intergenic non-protein coding RNA 669	RPL7AP66	0.346		pseudogene	ribosomal protein L7a pseudogene 66		<100kb	yes	same
AC034193.5	2.449	Solid_UP	pseudogene		EMC3	0.877		protein_coding	ER membrane protein complex subunit 3		<100kb	yes	opposite
LINC00243	5.167	Pan_UP	other ncRNAs	long intergenic non-protein coding RNA 243	XXbac-BPG27H4.8	0		lincRNA			<100kb	no	same
ZNRF2P2	4.559	Solid_UP	pseudogene	zinc and ring finger 2 pseudogene 2	AC007255.8	1.927		antisense			<100kb	no	same
RP11-187O7.3	3.476	Pan_ON	lincRNA		RP11-187O7.1	-0.035		pseudogene			<100kb	yes	same
LINC00511	3.962	Solid_UP	lincRNA	long intergenic non-protein coding RNA 511	RPL32P33	-0.471		pseudogene	ribosomal protein L32 pseudogene 33		<100kb	yes	opposite
CTD-2247C11.1	4.772	Solid_ON	lincRNA		CTD-2247C11.5	0		lincRNA			<100kb	no	same
RP11-434I12.2	5.899	Pan_UP	antisense		RP11-434I12.3	1.997		lincRNA			<100kb	no	opposite
RP11-187O7.3	3.476	Pan_ON	lincRNA		RP11-488C13.6	-0.474		antisense			<100kb	no	same
LAMTOR5-AS1	4.065	Solid_UP	antisense	LAMTOR5 antisense RNA 1	LAMTOR5	-0.015		protein_coding	late endosomal/lysosomal adaptor, MAPK and MTOR activator 5		<100kb	yes	opposite
RP11-54D18.3	4.154	Pan_UP	pseudogene		LDHAP4	-0.291		pseudogene	lactate dehydrogenase A pseudogene 4		<100kb	no	same
RP11-54D18.3	4.154	Pan_UP	pseudogene		RP11-54D18.2	-1.421		pseudogene			<1kb	yes	opposite
FTX	5.238	Pan_UP	lincRNA	FTX transcript, XIST regulator (non-protein coding)	MIR421	3.144		other ncRNAs	microRNA 421		<100kb	yes	same
RP11-758P17.3	7.228	Solid_ON	antisense		NYAP1	-0.663		protein_coding	neuronal tyrosine-phosphorylated phosphoinositide-3-kinase adaptor 1		<100kb	no	same
RP11-758P17.3	7.228	Solid_ON	antisense		PPP1R35	-0.01		protein_coding	protein phosphatase 1, regulatory subunit 35		<100kb	yes	opposite
AC034193.5	2.449	Solid_UP	pseudogene		PRRT3-AS1	0.695		antisense	PRRT3 antisense RNA 1		<100kb	no	same
FTX	5.238	Pan_UP	lincRNA	FTX transcript, XIST regulator (non-protein coding)	RP3-368A4.5	1.941		other ncRNAs			<100kb	yes	same
FTX	5.238	Pan_UP	lincRNA	FTX transcript, XIST regulator (non-protein coding)	USMG5P1	0.017		pseudogene	USMG5 pseudogene 1		<100kb	yes	opposite
RP11-187O7.3	3.476	Pan_ON	lincRNA		RP11-99E15.2	-0.612		lincRNA			<100kb	yes	same
CTC-513N18.7	-1.022	Pan_OFF	lincRNA		CTD-2626G11.2	0.387		lincRNA			<100kb	no	same
AC006262.5	5.684	Solid_ON	lincRNA		IGFL1P1	1.531		pseudogene	IGF-like family member 1 pseudogene 1		<100kb	yes	opposite
CTC-453G23.8	4.711	Solid_UP	antisense		C19orf68	0.602		protein_coding	chromosome 19 open reading frame 68		<100kb	no	same
AC034193.5	2.449	Solid_UP	pseudogene		AC022007.5	1.113		lincRNA			<100kb	yes	opposite
RP11-8L2.1	4.466	Solid_ON	other ncRNAs		RP11-274J2.1	0		pseudogene			<100kb	yes	opposite
RP11-54D18.3	4.154	Pan_UP	pseudogene		RP11-54D18.4	1.919		pseudogene			<100kb	yes	opposite
RNU1-122P	3.682	Pan_UP	other ncRNAs	RNA, U1 small nuclear 122, pseudogene	RP11-495P10.3	1.742		lincRNA			<1kb	yes	opposite
RNU6-781P	6.09	Pan_UP	other ncRNAs	RNA, U6 small nuclear 781, pseudogene	RP4-761J14.8	-1.358		antisense			<100kb	no	same
RP11-253M7.1	2.592	Pan_UP	antisense		RP11-279F6.1	-0.698		lincRNA			<100kb	no	opposite
RP11-314O13.1	5.606	Solid_ON	lincRNA		CMC2	1.908		protein_coding	C-x(9)-C motif containing 2		<100kb	no	same
CTC-548K16.1	3.806	Solid_ON	lincRNA		CTC-548K16.2	0		lincRNA			<100kb	yes	opposite
AC006262.5	5.684	Solid_ON	lincRNA		AC007193.6	-1.629		lincRNA			<100kb	yes	opposite
HOXA11-AS	5.083	Pan_UP	antisense	HOXA11 antisense RNA	RP1-170O19.14	-0.971		lincRNA			<100kb	yes	opposite
ZNRF2P1	2.864	Pan_UP	pseudogene	zinc and ring finger 2 pseudogene 1	DPY19L1P1	3.045		pseudogene	DPY19L1 pseudogene 1		<1kb	yes	opposite
PCAT7	6.756	Solid_ON	antisense	prostate cancer associated transcript 7 (non-protein coding)	RP11-533K9.3	0		pseudogene			<100kb	no	same
RP11-344E13.3	6.372	Pan_ON	antisense		ABHD17AP6	-1.986		pseudogene	abhydrolase domain containing 17A pseudogene 6		<100kb	no	same
CTC-498J12.1	2.69	Pan_UP	lincRNA		CTC-340D7.1	0		lincRNA			<100kb	no	same
CTC-498J12.1	2.69	Pan_UP	lincRNA		7SK	0		lincRNA			<100kb	no	same
LINC00243	5.167	Pan_UP	other ncRNAs	long intergenic non-protein coding RNA 243	DDR1-AS1	1.822		antisense	DDR1 antisense RNA 1 (head to head)		<100kb	no	same
RP5-1139I1.1	4.61	Pan_UP	lincRNA		RP5-1139I1.2	3.244		antisense			<100kb	no	opposite
PVT1	4.921	Solid_UP	other ncRNAs	Pvt1 oncogene (non-protein coding)	MIR1207	0.467		other ncRNAs	microRNA 1207		<100kb	yes	same
PVT1	4.921	Solid_UP	other ncRNAs	Pvt1 oncogene (non-protein coding)	RNU4-25P	-0.209		other ncRNAs	RNA, U4 small nuclear 25, pseudogene		<100kb	yes	opposite
PVT1	2.496	Solid_UP	other ncRNAs	Pvt1 oncogene (non-protein coding)	MIR1208	-0.641		other ncRNAs	microRNA 1208		<100kb	no	same
PVT1	5.339	Solid_UP	other ncRNAs	Pvt1 oncogene (non-protein coding)	CASC11	1.496		lincRNA	cancer susceptibility candidate 11 (non-protein coding)		<100kb	no	opposite
SNHG1	6.654	Pan_ON	other ncRNAs	small nucleolar RNA host gene 1 (non-protein coding)	RP11-727F15.9	3.681		antisense			<100kb	no	opposite
SDHAP3	2.695	Solid_UP	pseudogene	succinate dehydrogenase complex, subunit A, flavoprotein pseudogene 3	RP11-43F13.1	0.788		pseudogene			<100kb	no	same
SDHAP3	2.695	Solid_UP	pseudogene	succinate dehydrogenase complex, subunit A, flavoprotein pseudogene 3	CTD-2245E15.3	0		lincRNA			<100kb	no	same
TERC	2.021	Pan_UP	lincRNA	telomerase RNA component	RP11-816J6.3	0.016		antisense			<100kb	no	opposite
TERC	2.021	Pan_UP	lincRNA	telomerase RNA component	ACTRT3	-0.5		protein_coding	actin-related protein T3		<100kb	no	same
SNORA68	5.001	Solid_ON	other ncRNAs	small nucleolar RNA, H/ACA box 68	ZFX-AS1	1.438		antisense	ZFX antisense RNA 1		<100kb	no	opposite
SCARNA14	3.91	Solid_ON	other ncRNAs	small Cajal body-specific RNA 14	ATP5J2P6	1.079		pseudogene	ATP synthase, H+ transporting, mitochondrial Fo complex, subunit F2 pseudogene 6		<100kb	no	same
ZNF542	-0.367	Pan_OFF	pseudogene	zinc finger protein 542	AC006116.20	0.537		protein_coding			<100kb	no	same
ZNF542	-0.367	Pan_OFF	pseudogene	zinc finger protein 542	ZNF582-AS1	-0.825		lincRNA	ZNF582 antisense RNA 1 (head to head)		<100kb	no	same
MEG3	-4.559	Solid_OFF	lincRNA	maternally expressed 3 (non-protein coding)	AL117190.2	-4.126		protein_coding			<100kb	yes	opposite
MEG3	-4.559	Solid_OFF	lincRNA	maternally expressed 3 (non-protein coding)	RP11-123M6.2	-1.408		antisense			<100kb	yes	opposite
MT1L	-3.647	Solid_OFF	pseudogene	metallothionein 1L (gene/pseudogene)	AC026461.1	-1.375		protein_coding			<100kb	no	opposite
MT1L	-3.647	Solid_OFF	pseudogene	metallothionein 1L (gene/pseudogene)	RP11-249C24.10	-0.82		lincRNA			<100kb	no	opposite
