# Supplementary material for: Transcriptome Analysis of Recurrently Deregulated Genes across Multiple Cancers Identifies New Pan-Cancer Biomarkers
Source: Oxford University Press journal article supplement (doi:10.1158/0008-5472.can-15-0484), 2015-11-09
Supplement: 00085472can150484-sup-145596_2_supp_3145145_nkpkmp.xlsx [file 00085472can150484-sup-145596_2_supp_3145145_nkpkmp.xlsx]

## Sheet: Sheet1
Supplementary table 8. The overlap between the up regulated genes in FANTOM5 cancer cell lines and TCGA primary tumors, and signatures of pan cancer up-regulated genes reported by Rhodes 2004 and Xu 2007.
Xu 2007 only	Rhodes 2004 only	F5 and TCGA only	Xu 2007 and Rhodes 2004	Xu 2007 and F5 & TCGA	Rhodes 2004 and F5 & TCGA
ABCA8	ACLY	ASNS	CKS2	KIF14	RFC4
ADH1B	AHCY	ATAD2	NME1		TOP2A
ALDH1A1	ARMET	ATAD5	SOX4
ARPC1B	CANX	BLM
BAZ1B	CBX3	BUB1B
BOP1	CCT4	CASC5
C7orf24	CCT5	CBX2
C9orf61	CDC2	CCDC150
CA4	CDKN3	CCNE2
CBX7	COL1A2	CCNO
CCT3	COPB2	CD70
CD36	CRIP2	CDC6
CKAP4	DVL3	CDC7
CLEC3B	E2F5	CENPF
COX7A1	FAP	CENPM
CSRP1	FOLH1B	CHRNA5
CXCL12	G3BP	CLSPN
DEFA4	HDAC1	DBF4
DNMT1	HNRPA2B1	DLX1
FAT	HSPD1	DLX4
FBXO9	HSPE1	DLX6
FOXM1	IARS	DNAH14
FXYD1	IFNGR2	E2F8
GABARAPL1	ILF2	EXO1
HMGA1	KDELR2	FABP6
KIAA0101	KIAAD101	FAM111B
LTC4S	KIAAD111	GABRD
MAP3K11	KPNA2	GPR19
MARCKSL1	LDHA	HELLS
MYH11	MCM3	HOXB13
PON2	MMP9	HOXC13
POSTN	MRPL3	IGF2BP3
PTGDS	MRPS12	KIF23
RAB13	MTHFD2	KIFC2
RECQL	NC8P2	KRT80
SELP	NONO	MAST1
SH3BP5	NUP205	MCM2
SIPA1L3	OGT	MKI67
SUB1	PAFAH1B3	MLF1IP
TEK	PAICS	MMP13
TNXA	PLK	MNX1
TNXB	PPP2R5C	MYEOV
TYMS	PRDX4	NMU
	PSMC4	ONECUT2
	PSME2	OTX1
	PTMA	PABPC1L
	RBM4	PDX1
	RPL13	PKMYT1
	SDHC	POLQ
	SMARCA4	PRAME
	SNRPE	RACGAP1
	SNRPF	RAD54L
	SSBP1	RCOR2
	SSR1	RDM1
	TARS	RHPN1
	TGIF	RNFT2
	TPX2	SGOL1
	TRA1	SKA3
	TRAF4	SRCIN1
	TSTA3	TERT
	UBE2S	TMEM145
	p100	TNNT1
		TP73
		XRCC2
		ZIC2
