# Supplementary material for: Transcriptome Analysis of Recurrently Deregulated Genes across Multiple Cancers Identifies New Pan-Cancer Biomarkers
Source: Oxford University Press journal article supplement (doi:10.1158/0008-5472.can-15-0484), 2015-11-09
Supplement: 00085472can150484-sup-145596_2_supp_3145146_njpkmp.xlsx [file 00085472can150484-sup-145596_2_supp_3145146_njpkmp.xlsx]

## Sheet: Readme
Readme for Supplementary table 9
This supplement contains a summary of the mRNAs detected as differentially expressed in the FANTOM5 analysis
ALL - this provides a summary for 656 protein coding genes detected as recurrently up or down reulated across multiple cancer cell lines compared to primary cells
CORE - this provides a list of 128 protein coding genes that are differentially expressed in FANTOM5 cancer cell lines (DE pipeline + gene wise absFC > 2) and that are differentially expressed in TCGA primary tumors (DE thresholds: abs FC > 2, FDR < 0.01), and show the same directionality of expression change.
PROTEOME CONFIRMED - this provides a list of 128 protein coding genes that are differentially expressed in FANTOM5 cancer cell lines (DE pipeline + gene wise absFC > 2) and that are differentially expressed in TCGA colorectal tumors on protein level.
Column Legends:
gene_symbol- HGNC gene symbol
FANTOM5 log2FC - gene level, cancer vs normal log2 fold change, comparing cancer cell lines to normal primary cells
mean_tpm - mean tag per million in FANTOM5 CAGE data collection
description - gene description
FANTOM5 Pan-Cancer DE - FANTOM5 Pan cancer analysis based on CAGE profiling in cancer cell lines
Zhang_COAD_proteome_DE - Called as differntially expressed in the Zhang et al. colon cancer dataset. Note NA - protein is not detected in the proteome spectral count data
TCGA Pan-Cancer DE - concensus Pan Cancer Differnetial expression (in-house analysis)
TCGA UP - number of TCGA tumor types in which given gene is up-regulated
TCGA DOWN - number of TCGA tumor types in which given gene is up-regulated ( score of -9 means down-regulated in 9)
Cabanski UP - number of TCGA tumor types in which given gene is up-regulated. As reported by: Cabanski, C. R., White, N. M., Dang, H. X., Silva-Fisher, J. M., Rauck, C. E., Cicka, D., & Maher, C. A. (2015). Pan-cancer transcriptome analysis reveals long noncoding RNAs with conserved function. RNA Biology, 0. doi:10.1080/15476286.2015.1038012
Cabanski DOWN - number of TCGA tumor types in which given gene is down-regulated. As reported by: Cabanski, C. R., White, N. M., Dang, H. X., Silva-Fisher, J. M., Rauck, C. E., Cicka, D., & Maher, C. A. (2015). Pan-cancer transcriptome analysis reveals long noncoding RNAs with conserved function. RNA Biology, 0. doi:10.1080/15476286.2015.1038012
Oncomine UP - number of Oncomine analysis in which given gene is up-regulated.
Oncomine DOWN - number of Oncomine analysis in which given gene is down-regulated.
Differential expression in specific tumor types from TCGA RNA-seq data - calls on whether the gene is detected as differentially expressed in a particular cancer type (4 letter codes match those in supp table 1)

## Sheet: ALL
ALL - this provides a summary for 656 protein coding genes detected as recurrently up or down reulated across multiple cancer cell lines compared to primary cells
													Differential expression in specific tumor types from TCGA RNA-seq data
gene_symbol	FANTOM5 log2FC	FANTOM5 mean_tpm	description	FANTOM5 Pan- Cancer DE	Zhang_COAD_proteome_DE	TCGA Pan-Cancer DE	TCGA UP	TCGA DOWN	Cabanski UP	Cabanski DOWN	Oncomine UP	Oncomine DOWN	BLCA	BRCA	COAD	HNSC	KICH	KIRC	KIRP	LIHC	LUAD	LUSC	PRAD	READ	THCA	UCEC
ABCC2	5.201	0.715	ATP-binding cassette, sub-family C (CFTR/MRP), member 2	UP	not_DE	NA	NA	NA	NA	NA	NA	NA	NA	NA	NA	NA	NA	NA	NA	NA	NA	NA	NA	NA	NA	NA
ACOX2	-1.529	2.721	acyl-CoA oxidase 2, branched chain	DOWN	not_DE	DOWN	0	-9	0	-4	0	-2	-1	0	0	-1	-1	-1	-1	-1	0	-1	-1	0	0	-1
ACSM3	1.997	2.536	acyl-CoA synthetase medium-chain family member 3	UP	not_DE	DOWN	0	-8	NA	NA	NA	NA	0	-1	0	-1	-1	-1	-1	-1	0	-1	0	-1	0	0
ACTL8	3.846	1.523	actin-like 8	UP	not_DE	NA	NA	NA	NA	NA	1	0	NA	NA	NA	NA	NA	NA	NA	NA	NA	NA	NA	NA	NA	NA
ACVR2B	1.528	1.191	activin A receptor, type IIB	UP	NA	NA	NA	NA	NA	NA	NA	NA	NA	NA	NA	NA	NA	NA	NA	NA	NA	NA	NA	NA	NA	NA
ADAM11	4.531	1.596	ADAM metallopeptidase domain 11	UP	NA	NA	NA	NA	NA	NA	NA	NA	NA	NA	NA	NA	NA	NA	NA	NA	NA	NA	NA	NA	NA	NA
ADAM22	3.107	14.213	ADAM metallopeptidase domain 22	UP	NA	NA	NA	NA	NA	NA	NA	NA	NA	NA	NA	NA	NA	NA	NA	NA	NA	NA	NA	NA	NA	NA
ADAMTS16	3.329	0.072	ADAM metallopeptidase with thrombospondin type 1 motif, 16	UP	NA	NA	NA	NA	1	-1	NA	NA	NA	NA	NA	NA	NA	NA	NA	NA	NA	NA	NA	NA	NA	NA
ADD2	4.213	15.259	adducin 2 (beta)	UP	not_DE	NA	NA	NA	NA	NA	NA	NA	NA	NA	NA	NA	NA	NA	NA	NA	NA	NA	NA	NA	NA	NA
ADPRH	-2.52	2.086	ADP-ribosylarginine hydrolase	DOWN	not_DE	NA	NA	NA	NA	NA	NA	NA	NA	NA	NA	NA	NA	NA	NA	NA	NA	NA	NA	NA	NA	NA
AEBP1	-2.663	91.152	AE binding protein 1	DOWN	UP	NA	NA	NA	NA	NA	NA	NA	NA	NA	NA	NA	NA	NA	NA	NA	NA	NA	NA	NA	NA	NA
AKAP9	1.013	0.103	A kinase (PRKA) anchor protein 9	UP	not_DE	NA	NA	NA	NA	NA	NA	NA	NA	NA	NA	NA	NA	NA	NA	NA	NA	NA	NA	NA	NA	NA
AKNA	-3.157	14.47	AT-hook transcription factor	DOWN	NA	NA	NA	NA	NA	NA	NA	NA	NA	NA	NA	NA	NA	NA	NA	NA	NA	NA	NA	NA	NA	NA
AKR1B10	4.28	0.154	aldo-keto reductase family 1, member B10 (aldose reductase)	UP	DOWN	NA	NA	NA	2	-1	NA	NA	NA	NA	NA	NA	NA	NA	NA	NA	NA	NA	NA	NA	NA	NA
ALDOC	-1.233	39.053	aldolase C, fructose-bisphosphate	DOWN	not_DE	NA	NA	NA	1	-1	NA	NA	NA	NA	NA	NA	NA	NA	NA	NA	NA	NA	NA	NA	NA	NA
ALOX5AP	-4.172	58.25	arachidonate 5-lipoxygenase-activating protein	DOWN	not_DE	NA	NA	NA	0	-2	NA	NA	NA	NA	NA	NA	NA	NA	NA	NA	NA	NA	NA	NA	NA	NA
ALPP	3.874	3.718	alkaline phosphatase, placental	UP	NA	NA	NA	NA	1	-2	NA	NA	NA	NA	NA	NA	NA	NA	NA	NA	NA	NA	NA	NA	NA	NA
ALPPL2	5.526	6.287	alkaline phosphatase, placental-like 2	UP	not_DE	NA	NA	NA	NA	NA	NA	NA	NA	NA	NA	NA	NA	NA	NA	NA	NA	NA	NA	NA	NA	NA
ANGPTL4	-4.041	43.651	angiopoietin-like 4	DOWN	NA	NA	NA	NA	1	-1	NA	NA	NA	NA	NA	NA	NA	NA	NA	NA	NA	NA	NA	NA	NA	NA
ANKRD18A	3.054	1.711	ankyrin repeat domain 18A	UP	NA	NA	NA	NA	NA	NA	NA	NA	NA	NA	NA	NA	NA	NA	NA	NA	NA	NA	NA	NA	NA	NA
ANKRD32	1.503	0.611	ankyrin repeat domain 32	UP	NA	NA	NA	NA	NA	NA	NA	NA	NA	NA	NA	NA	NA	NA	NA	NA	NA	NA	NA	NA	NA	NA
ANKRD63	6.11	0.395	ankyrin repeat domain 63	UP	NA	NA	NA	NA	NA	NA	NA	NA	NA	NA	NA	NA	NA	NA	NA	NA	NA	NA	NA	NA	NA	NA
ANPEP	-2.6	92.447	alanyl (membrane) aminopeptidase	DOWN	DOWN	DOWN	1	-7	1	-1	NA	NA	0	-1	-1	0	-1	0	-1	0	-1	-1	0	-1	0	1
AOX1	-4.754	0.66	aldehyde oxidase 1	DOWN	not_DE	DOWN	0	-14	0	-6	0	-3	-1	-1	-1	-1	-1	-1	-1	-1	-1	-1	-1	-1	-1	-1
APOD	-1.611	28.667	apolipoprotein D	DOWN	DOWN	DOWN	0	-11	0	-4	0	-1	-1	-1	-1	-1	-1	-1	-1	0	0	-1	0	-1	-1	-1
ARC	3.48	2.725	activity-regulated cytoskeleton-associated protein	UP	NA	DOWN	0	-11	0	-4	NA	NA	-1	-1	-1	0	-1	-1	-1	0	-1	-1	-1	0	-1	-1
ARHGAP22	-1.72	15.595	Rho GTPase activating protein 22	DOWN	NA	NA	NA	NA	NA	NA	NA	NA	NA	NA	NA	NA	NA	NA	NA	NA	NA	NA	NA	NA	NA	NA
ARHGAP31	-1.493	8.527	Rho GTPase activating protein 31	DOWN	NA	NA	NA	NA	0	-2	NA	NA	NA	NA	NA	NA	NA	NA	NA	NA	NA	NA	NA	NA	NA	NA
ARMC3	1.276	0.044	armadillo repeat containing 3	UP	NA	NA	NA	NA	NA	NA	NA	NA	NA	NA	NA	NA	NA	NA	NA	NA	NA	NA	NA	NA	NA	NA
ARMCX1	-1.089	15.967	armadillo repeat containing, X-linked 1	DOWN	NA	DOWN	0	-7	NA	NA	0	-2	-1	0	-1	0	0	0	0	0	-1	-1	-1	-1	0	-1
ARMCX2	-1.647	43.024	armadillo repeat containing, X-linked 2	DOWN	NA	NA	NA	NA	NA	NA	NA	NA	NA	NA	NA	NA	NA	NA	NA	NA	NA	NA	NA	NA	NA	NA
ASNS	1.266	1.157	asparagine synthetase (glutamine-hydrolyzing)	UP	UP	UP	8	0	NA	NA	NA	NA	0	0	1	0	1	0	1	1	1	1	0	1	0	1
ATAD2	2.154	0.917	ATPase family, AAA domain containing 2	UP	not_DE	UP	9	0	NA	NA	NA	NA	1	1	1	1	0	0	0	1	1	1	0	1	0	1
ATAD5	2.199	8.667	ATPase family, AAA domain containing 5	UP	NA	UP	10	0	2	0	NA	NA	1	0	1	1	0	1	1	1	1	1	0	1	0	1
B3GNT8	-2.384	3.194	UDP-GlcNAc:betaGal beta-1,3-N-acetylglucosaminyltransferase 8	DOWN	NA	NA	NA	NA	NA	NA	0	-1	NA	NA	NA	NA	NA	NA	NA	NA	NA	NA	NA	NA	NA	NA
B4GALNT1	2.42	10.295	beta-1,4-N-acetyl-galactosaminyl transferase 1	UP	NA	NA	NA	NA	3	0	NA	NA	NA	NA	NA	NA	NA	NA	NA	NA	NA	NA	NA	NA	NA	NA
B4GALNT3	2.256	1.276	beta-1,4-N-acetyl-galactosaminyl transferase 3	UP	NA	NA	NA	NA	1	-1	NA	NA	NA	NA	NA	NA	NA	NA	NA	NA	NA	NA	NA	NA	NA	NA
BAIAP3	2.067	5.468	BAI1-associated protein 3	UP	NA	NA	NA	NA	NA	NA	NA	NA	NA	NA	NA	NA	NA	NA	NA	NA	NA	NA	NA	NA	NA	NA
BARD1	1.609	0.366	BRCA1 associated RING domain 1	UP	NA	NA	NA	NA	NA	NA	NA	NA	NA	NA	NA	NA	NA	NA	NA	NA	NA	NA	NA	NA	NA	NA
BASP1	-2.298	33.681	brain abundant, membrane attached signal protein 1	DOWN	DOWN	NA	NA	NA	NA	NA	NA	NA	NA	NA	NA	NA	NA	NA	NA	NA	NA	NA	NA	NA	NA	NA
BCAT1	1.507	6.593	branched chain amino-acid transaminase 1, cytosolic	UP	not_DE	NA	NA	NA	NA	NA	NA	NA	NA	NA	NA	NA	NA	NA	NA	NA	NA	NA	NA	NA	NA	NA
BCL2L11	1.3	0.283	BCL2-like 11 (apoptosis facilitator)	UP	NA	NA	NA	NA	NA	NA	NA	NA	NA	NA	NA	NA	NA	NA	NA	NA	NA	NA	NA	NA	NA	NA
BEX4	-1.654	100.905	brain expressed, X-linked 4	DOWN	NA	DOWN	0	-6	NA	NA	NA	NA	0	0	-1	-1	0	-1	0	0	-1	0	0	-1	0	-1
BFSP2	4.242	0.412	beaded filament structural protein 2, phakinin	UP	NA	NA	NA	NA	NA	NA	NA	NA	NA	NA	NA	NA	NA	NA	NA	NA	NA	NA	NA	NA	NA	NA
BGN	-3.121	443.942	biglycan	DOWN	UP	NA	NA	NA	NA	NA	1	0	NA	NA	NA	NA	NA	NA	NA	NA	NA	NA	NA	NA	NA	NA
BLM	1.753	0.5	Bloom syndrome, RecQ helicase-like	UP	not_DE	UP	12	0	2	0	NA	NA	1	1	1	1	0	1	1	1	1	1	1	1	0	1
BMP7	4.272	5.616	bone morphogenetic protein 7	UP	NA	NA	NA	NA	2	-1	NA	NA	NA	NA	NA	NA	NA	NA	NA	NA	NA	NA	NA	NA	NA	NA
BMP8B	4.757	3.435	bone morphogenetic protein 8b	UP	NA	NA	NA	NA	NA	NA	NA	NA	NA	NA	NA	NA	NA	NA	NA	NA	NA	NA	NA	NA	NA	NA
BRCA1	1.677	0.574	breast cancer 1, early onset	UP	NA	NA	NA	NA	NA	NA	NA	NA	NA	NA	NA	NA	NA	NA	NA	NA	NA	NA	NA	NA	NA	NA
BRCC3	1.006	0.202	BRCA1/BRCA2-containing complex, subunit 3	UP	not_DE	NA	NA	NA	NA	NA	NA	NA	NA	NA	NA	NA	NA	NA	NA	NA	NA	NA	NA	NA	NA	NA
BRSK2	3.183	3.054	BR serine/threonine kinase 2	UP	NA	NA	NA	NA	NA	NA	NA	NA	NA	NA	NA	NA	NA	NA	NA	NA	NA	NA	NA	NA	NA	NA
BST1	-1.484	8.941	bone marrow stromal cell antigen 1	DOWN	not_DE	DOWN	0	-8	NA	NA	NA	NA	-1	-1	-1	0	-1	0	0	0	-1	-1	0	-1	0	-1
BTBD3	1.144	0.176	BTB (POZ) domain containing 3	UP	NA	NA	NA	NA	NA	NA	NA	NA	NA	NA	NA	NA	NA	NA	NA	NA	NA	NA	NA	NA	NA	NA
BUB1B	2.279	19.047	BUB1 mitotic checkpoint serine/threonine kinase B	UP	NA	UP	14	0	5	0	1	0	1	1	1	1	1	1	1	1	1	1	1	1	1	1
C12orf79	3.082	0.313	chromosome 12 open reading frame 79	UP	NA	NA	NA	NA	NA	NA	NA	NA	NA	NA	NA	NA	NA	NA	NA	NA	NA	NA	NA	NA	NA	NA
C19orf57	1.755	0.75	chromosome 19 open reading frame 57	UP	NA	NA	NA	NA	NA	NA	NA	NA	NA	NA	NA	NA	NA	NA	NA	NA	NA	NA	NA	NA	NA	NA
C1QL1	3.704	6.229	complement component 1, q subcomponent-like 1	UP	NA	NA	NA	NA	2	-2	NA	NA	NA	NA	NA	NA	NA	NA	NA	NA	NA	NA	NA	NA	NA	NA
C1QL4	5.089	0.35	complement component 1, q subcomponent-like 4	UP	NA	NA	NA	NA	NA	NA	NA	NA	NA	NA	NA	NA	NA	NA	NA	NA	NA	NA	NA	NA	NA	NA
C1QTNF1	-2.154	1.337	C1q and tumor necrosis factor related protein 1	DOWN	NA	NA	NA	NA	NA	NA	NA	NA	NA	NA	NA	NA	NA	NA	NA	NA	NA	NA	NA	NA	NA	NA
C1QTNF5	-3.631	4.622	C1q and tumor necrosis factor related protein 5	DOWN	not_DE	NA	NA	NA	NA	NA	NA	NA	NA	NA	NA	NA	NA	NA	NA	NA	NA	NA	NA	NA	NA	NA
C20orf26	2.445	0.668	chromosome 20 open reading frame 26	UP	NA	NA	NA	NA	NA	NA	NA	NA	NA	NA	NA	NA	NA	NA	NA	NA	NA	NA	NA	NA	NA	NA
C21orf90	3.889	0.585	chromosome 21 open reading frame 90	UP	NA	NA	NA	NA	NA	NA	NA	NA	NA	NA	NA	NA	NA	NA	NA	NA	NA	NA	NA	NA	NA	NA
C2orf70	3.447	1.115	chromosome 2 open reading frame 70	UP	NA	NA	NA	NA	NA	NA	NA	NA	NA	NA	NA	NA	NA	NA	NA	NA	NA	NA	NA	NA	NA	NA
C5orf34	2.18	0.976	chromosome 5 open reading frame 34	UP	NA	NA	NA	NA	NA	NA	NA	NA	NA	NA	NA	NA	NA	NA	NA	NA	NA	NA	NA	NA	NA	NA
C7orf72	2.621	0.143	chromosome 7 open reading frame 72	UP	NA	NA	NA	NA	NA	NA	NA	NA	NA	NA	NA	NA	NA	NA	NA	NA	NA	NA	NA	NA	NA	NA
CADM1	1.075	0.163	cell adhesion molecule 1	UP	not_DE	DOWN	0	-8	NA	NA	1	0	-1	0	-1	-1	-1	-1	0	0	-1	-1	0	-1	0	0
CADM2	4.055	38.766	cell adhesion molecule 2	UP	NA	DOWN	0	-10	NA	NA	NA	NA	-1	-1	-1	-1	-1	-1	-1	-1	0	0	0	-1	-1	0
CADPS2	2.148	0.956	Ca++-dependent secretion activator 2	UP	not_DE	NA	NA	NA	NA	NA	NA	NA	NA	NA	NA	NA	NA	NA	NA	NA	NA	NA	NA	NA	NA	NA
CASC5	1.779	0.541	cancer susceptibility candidate 5	UP	NA	UP	8	-1	5	0	NA	NA	1	1	1	1	0	0	-1	0	1	1	1	0	0	1
CASP8	2.63	10.426	caspase 8, apoptosis-related cysteine peptidase	UP	not_DE	NA	NA	NA	NA	NA	NA	NA	NA	NA	NA	NA	NA	NA	NA	NA	NA	NA	NA	NA	NA	NA
CBFA2T2	1.154	0.703	core-binding factor, runt domain, alpha subunit 2; translocated to, 2	UP	NA	NA	NA	NA	NA	NA	NA	NA	NA	NA	NA	NA	NA	NA	NA	NA	NA	NA	NA	NA	NA	NA
CBX2	2.587	5.617	chromobox homolog 2	UP	NA	UP	11	0	4	0	NA	NA	1	1	1	1	0	0	0	1	1	1	1	1	1	1
CCDC14	1.173	0.573	coiled-coil domain containing 14	UP	NA	NA	NA	NA	NA	NA	NA	NA	NA	NA	NA	NA	NA	NA	NA	NA	NA	NA	NA	NA	NA	NA
CCDC144NL	6.109	0.804	coiled-coil domain containing 144 family, N-terminal like	UP	NA	NA	NA	NA	NA	NA	NA	NA	NA	NA	NA	NA	NA	NA	NA	NA	NA	NA	NA	NA	NA	NA
CCDC150	2.826	3.517	coiled-coil domain containing 150	UP	NA	UP	9	-1	NA	NA	1	0	1	1	1	1	-1	1	0	0	1	1	0	1	0	1
CCDC34	1.838	0.501	coiled-coil domain containing 34	UP	NA	NA	NA	NA	NA	NA	NA	NA	NA	NA	NA	NA	NA	NA	NA	NA	NA	NA	NA	NA	NA	NA
CCDC57	1.811	0.846	coiled-coil domain containing 57	UP	NA	NA	NA	NA	NA	NA	1	0	NA	NA	NA	NA	NA	NA	NA	NA	NA	NA	NA	NA	NA	NA
CCDC77	1.279	0.774	coiled-coil domain containing 77	UP	NA	NA	NA	NA	NA	NA	NA	NA	NA	NA	NA	NA	NA	NA	NA	NA	NA	NA	NA	NA	NA	NA
CCND2	-4.648	22.001	cyclin D2	DOWN	NA	NA	NA	NA	0	-2	NA	NA	NA	NA	NA	NA	NA	NA	NA	NA	NA	NA	NA	NA	NA	NA
CCNE2	1.446	0.096	cyclin E2	UP	NA	UP	9	0	NA	NA	2	0	1	1	0	1	0	1	1	1	1	1	0	0	0	1
CCNO	2.65	2.623	cyclin O	UP	NA	UP	9	-1	2	-1	NA	NA	1	1	1	0	0	-1	1	1	1	1	0	1	0	1
CD248	-4.727	49.465	CD248 molecule, endosialin	DOWN	not_DE	NA	NA	NA	NA	NA	NA	NA	NA	NA	NA	NA	NA	NA	NA	NA	NA	NA	NA	NA	NA	NA
CD4	-3.191	24.325	CD4 molecule	DOWN	NA	NA	NA	NA	NA	NA	NA	NA	NA	NA	NA	NA	NA	NA	NA	NA	NA	NA	NA	NA	NA	NA
CD55	1.32	0.234	CD55 molecule, decay accelerating factor for complement (Cromer blood group)	UP	UP	NA	NA	NA	NA	NA	NA	NA	NA	NA	NA	NA	NA	NA	NA	NA	NA	NA	NA	NA	NA	NA
CD70	4.533	0.464	CD70 molecule	UP	not_DE	UP	4	0	2	0	NA	NA	0	0	0	1	0	1	1	0	0	0	0	0	1	0
CDC42EP5	-2.254	24.551	CDC42 effector protein (Rho GTPase binding) 5	DOWN	not_DE	NA	NA	NA	NA	NA	NA	NA	NA	NA	NA	NA	NA	NA	NA	NA	NA	NA	NA	NA	NA	NA
CDC6	1.83	0.2	cell division cycle 6	UP	NA	UP	12	0	6	0	NA	NA	1	1	1	1	0	1	1	1	1	1	0	1	1	1
CDC7	1.544	0.198	cell division cycle 7	UP	NA	UP	8	0	NA	NA	NA	NA	1	1	1	0	0	0	1	1	1	1	0	0	0	1
CDH11	-1.855	37.814	cadherin 11, type 2, OB-cadherin (osteoblast)	DOWN	not_DE	NA	NA	NA	NA	NA	NA	NA	NA	NA	NA	NA	NA	NA	NA	NA	NA	NA	NA	NA	NA	NA
CDH13	-2.052	21.833	cadherin 13	DOWN	not_DE	NA	NA	NA	NA	NA	NA	NA	NA	NA	NA	NA	NA	NA	NA	NA	NA	NA	NA	NA	NA	NA
CDH5	-6.11	32.682	cadherin 5, type 2 (vascular endothelium)	DOWN	NA	NA	NA	NA	0	-2	NA	NA	NA	NA	NA	NA	NA	NA	NA	NA	NA	NA	NA	NA	NA	NA
CDH7	4.244	0.16	cadherin 7, type 2	UP	NA	NA	NA	NA	NA	NA	NA	NA	NA	NA	NA	NA	NA	NA	NA	NA	NA	NA	NA	NA	NA	NA
CDKN1A	-1.82	0.549	cyclin-dependent kinase inhibitor 1A (p21, Cip1)	DOWN	NA	NA	NA	NA	NA	NA	NA	NA	NA	NA	NA	NA	NA	NA	NA	NA	NA	NA	NA	NA	NA	NA
CDKN2A	-1.517	68.484	cyclin-dependent kinase inhibitor 2A	DOWN	NA	UP	14	0	5	0	1	0	1	1	1	1	1	1	1	1	1	1	1	1	1	1
CDKN2B	-1.19	17.161	cyclin-dependent kinase inhibitor 2B (p15, inhibits CDK4)	DOWN	NA	NA	NA	NA	NA	NA	NA	NA	NA	NA	NA	NA	NA	NA	NA	NA	NA	NA	NA	NA	NA	NA
CDX2	3.651	2.323	caudal type homeobox 2	UP	not_DE	NA	NA	NA	NA	NA	NA	NA	NA	NA	NA	NA	NA	NA	NA	NA	NA	NA	NA	NA	NA	NA
CENPF	2.644	3.146	centromere protein F, 350/400kDa	UP	NA	UP	13	0	6	0	1	0	1	1	1	1	1	1	1	1	1	1	1	1	0	1
CEP152	2.092	3.188	centrosomal protein 152kDa	UP	NA	NA	NA	NA	NA	NA	NA	NA	NA	NA	NA	NA	NA	NA	NA	NA	NA	NA	NA	NA	NA	NA
CHN2	2.412	0.561	chimerin 2	UP	NA	NA	NA	NA	NA	NA	NA	NA	NA	NA	NA	NA	NA	NA	NA	NA	NA	NA	NA	NA	NA	NA
CHRM3	2.855	0.17	cholinergic receptor, muscarinic 3	UP	NA	NA	NA	NA	NA	NA	NA	NA	NA	NA	NA	NA	NA	NA	NA	NA	NA	NA	NA	NA	NA	NA
CHRNA5	2.26	3.789	cholinergic receptor, nicotinic, alpha 5 (neuronal)	UP	NA	UP	7	0	2	0	NA	NA	1	0	0	0	0	0	1	1	1	1	1	0	0	1
CHST2	-3.286	9.018	carbohydrate (N-acetylglucosamine-6-O) sulfotransferase 2	DOWN	not_DE	NA	NA	NA	NA	NA	0	-1	NA	NA	NA	NA	NA	NA	NA	NA	NA	NA	NA	NA	NA	NA
CLEC2L	2.385	0.283	C-type lectin domain family 2, member L	UP	NA	NA	NA	NA	NA	NA	NA	NA	NA	NA	NA	NA	NA	NA	NA	NA	NA	NA	NA	NA	NA	NA
CLIP3	-2.608	51.21	CAP-GLY domain containing linker protein 3	DOWN	NA	DOWN	1	-8	0	-3	NA	NA	-1	-1	-1	0	-1	0	-1	0	0	0	-1	-1	1	-1
CLMN	1.38	2.216	calmin (calponin-like, transmembrane)	UP	DOWN	NA	NA	NA	NA	NA	NA	NA	NA	NA	NA	NA	NA	NA	NA	NA	NA	NA	NA	NA	NA	NA
CLSPN	1.76	0.891	claspin	UP	NA	UP	13	0	5	0	NA	NA	1	1	1	1	0	1	1	1	1	1	1	1	1	1
CMSS1	1.528	0.443	cms1 ribosomal small subunit homolog (yeast)	UP	NA	NA	NA	NA	NA	NA	NA	NA	NA	NA	NA	NA	NA	NA	NA	NA	NA	NA	NA	NA	NA	NA
CNN2	-1.174	2.799	calponin 2	DOWN	UP	NA	NA	NA	NA	NA	1	0	NA	NA	NA	NA	NA	NA	NA	NA	NA	NA	NA	NA	NA	NA
CNNM1	2.97	1.848	cyclin M1	UP	NA	NA	NA	NA	1	-1	NA	NA	NA	NA	NA	NA	NA	NA	NA	NA	NA	NA	NA	NA	NA	NA
COCH	5.655	1.163	cochlin	UP	NA	NA	NA	NA	2	-1	NA	NA	NA	NA	NA	NA	NA	NA	NA	NA	NA	NA	NA	NA	NA	NA
COL16A1	-4.27	14.862	collagen, type XVI, alpha 1	DOWN	not_DE	NA	NA	NA	NA	NA	NA	NA	NA	NA	NA	NA	NA	NA	NA	NA	NA	NA	NA	NA	NA	NA
COL1A1	-4.594	10.455	collagen, type I, alpha 1	DOWN	not_DE	UP	9	0	6	0	NA	NA	0	1	1	1	0	1	0	1	1	1	0	1	1	0
COL1A2	-4.837	1302.42	collagen, type I, alpha 2	DOWN	not_DE	NA	NA	NA	NA	NA	NA	NA	NA	NA	NA	NA	NA	NA	NA	NA	NA	NA	NA	NA	NA	NA
COL3A1	-3.98	805.532	collagen, type III, alpha 1	DOWN	not_DE	NA	NA	NA	3	0	NA	NA	NA	NA	NA	NA	NA	NA	NA	NA	NA	NA	NA	NA	NA	NA
COL5A2	-1.143	205.414	collagen, type V, alpha 2	DOWN	not_DE	UP	7	0	4	0	NA	NA	0	1	1	1	0	1	0	0	1	1	0	1	0	0
COL6A3	-4.561	114.677	collagen, type VI, alpha 3	DOWN	not_DE	NA	NA	NA	1	-1	NA	NA	NA	NA	NA	NA	NA	NA	NA	NA	NA	NA	NA	NA	NA	NA
COX7A1	-7.932	25.098	cytochrome c oxidase subunit VIIa polypeptide 1 (muscle)	DOWN	NA	DOWN	0	-10	0	-5	NA	NA	-1	-1	-1	-1	0	0	-1	0	-1	-1	-1	-1	0	-1
COX7B2	6.886	0.429	cytochrome c oxidase subunit VIIb2	UP	NA	NA	NA	NA	NA	NA	NA	NA	NA	NA	NA	NA	NA	NA	NA	NA	NA	NA	NA	NA	NA	NA
CPEB1	1.482	0.058	cytoplasmic polyadenylation element binding protein 1	UP	NA	DOWN	0	-9	0	-3	NA	NA	-1	-1	-1	0	0	-1	0	0	-1	-1	-1	-1	0	-1
CSAG1	9.303	1.653	chondrosarcoma associated gene 1	UP	NA	NA	NA	NA	NA	NA	NA	NA	NA	NA	NA	NA	NA	NA	NA	NA	NA	NA	NA	NA	NA	NA
CSE1L	1.094	0.182	CSE1 chromosome segregation 1-like (yeast)	UP	UP	NA	NA	NA	NA	NA	NA	NA	NA	NA	NA	NA	NA	NA	NA	NA	NA	NA	NA	NA	NA	NA
CTC-349C3.1	2.734	0.311		UP	NA	NA	NA	NA	NA	NA	NA	NA	NA	NA	NA	NA	NA	NA	NA	NA	NA	NA	NA	NA	NA	NA
CTD-2587H24.4	4.058	0.912		UP	NA	NA	NA	NA	NA	NA	NA	NA	NA	NA	NA	NA	NA	NA	NA	NA	NA	NA	NA	NA	NA	NA
CTD-3193O13.9	3.984	0.161		UP	NA	NA	NA	NA	NA	NA	NA	NA	NA	NA	NA	NA	NA	NA	NA	NA	NA	NA	NA	NA	NA	NA
CTSK	-5.186	23.111	cathepsin K	DOWN	not_DE	NA	NA	NA	NA	NA	NA	NA	NA	NA	NA	NA	NA	NA	NA	NA	NA	NA	NA	NA	NA	NA
CXADR	1.906	0.553	coxsackie virus and adenovirus receptor	UP	not_DE	NA	NA	NA	NA	NA	NA	NA	NA	NA	NA	NA	NA	NA	NA	NA	NA	NA	NA	NA	NA	NA
CXCL1	-1.263	265.736	chemokine (C-X-C motif) ligand 1 (melanoma growth stimulating activity, alpha)	DOWN	NA	NA	NA	NA	1	-1	NA	NA	NA	NA	NA	NA	NA	NA	NA	NA	NA	NA	NA	NA	NA	NA
CXCL2	-1.035	63.176	chemokine (C-X-C motif) ligand 2	DOWN	NA	DOWN	2	-8	0	-4	0	-2	-1	-1	1	-1	-1	0	0	-1	-1	-1	0	1	0	-1
CXCL5	-2.384	66.999	chemokine (C-X-C motif) ligand 5	DOWN	not_DE	NA	NA	NA	2	-2	NA	NA	NA	NA	NA	NA	NA	NA	NA	NA	NA	NA	NA	NA	NA	NA
CXCL6	-5.014	101.901	chemokine (C-X-C motif) ligand 6	DOWN	NA	NA	NA	NA	NA	NA	NA	NA	NA	NA	NA	NA	NA	NA	NA	NA	NA	NA	NA	NA	NA	NA
CYB5R2	-2.753	6.061	cytochrome b5 reductase 2	DOWN	not_DE	NA	NA	NA	NA	NA	0	-1	NA	NA	NA	NA	NA	NA	NA	NA	NA	NA	NA	NA	NA	NA
CYGB	-4.19	32.051	cytoglobin	DOWN	DOWN	NA	NA	NA	NA	NA	NA	NA	NA	NA	NA	NA	NA	NA	NA	NA	NA	NA	NA	NA	NA	NA
DBF4	1.63	1.261	DBF4 homolog (S. cerevisiae)	UP	NA	UP	8	0	NA	NA	NA	NA	1	1	1	0	1	0	0	0	1	1	0	1	0	1
DCDC1	3.643	1.205	doublecortin domain containing 1	UP	NA	NA	NA	NA	NA	NA	NA	NA	NA	NA	NA	NA	NA	NA	NA	NA	NA	NA	NA	NA	NA	NA
DCN	-3.973	101.922	decorin	DOWN	DOWN	DOWN	0	-13	0	-4	0	-1	-1	-1	-1	0	-1	-1	-1	-1	-1	-1	-1	-1	-1	-1
DDN	1.99	0.144	dendrin	UP	NA	NA	NA	NA	NA	NA	NA	NA	NA	NA	NA	NA	NA	NA	NA	NA	NA	NA	NA	NA	NA	NA
DDX21	1.152	0.141	DEAD (Asp-Glu-Ala-Asp) box helicase 21	UP	UP	NA	NA	NA	NA	NA	NA	NA	NA	NA	NA	NA	NA	NA	NA	NA	NA	NA	NA	NA	NA	NA
DKK3	-2.542	83.535	dickkopf WNT signaling pathway inhibitor 3	DOWN	NA	NA	NA	NA	NA	NA	0	-1	NA	NA	NA	NA	NA	NA	NA	NA	NA	NA	NA	NA	NA	NA
DLX1	5.185	1.844	distal-less homeobox 1	UP	NA	UP	5	-1	2	0	2	0	0	0	-1	1	0	1	0	0	0	1	1	0	0	1
DLX2	3.367	10.134	distal-less homeobox 2	UP	NA	NA	NA	NA	NA	NA	1	0	NA	NA	NA	NA	NA	NA	NA	NA	NA	NA	NA	NA	NA	NA
DLX3	5.395	4.948	distal-less homeobox 3	UP	NA	NA	NA	NA	NA	NA	NA	NA	NA	NA	NA	NA	NA	NA	NA	NA	NA	NA	NA	NA	NA	NA
DLX4	5.282	0.59	distal-less homeobox 4	UP	NA	UP	9	0	NA	NA	NA	NA	1	1	1	1	0	1	1	0	0	1	0	1	0	1
DLX6	5.604	1.202	distal-less homeobox 6	UP	NA	UP	8	0	3	0	NA	NA	1	0	1	1	0	1	0	0	1	1	0	1	0	1
DNAAF1	1.654	0.932	dynein, axonemal, assembly factor 1	UP	not_DE	NA	NA	NA	NA	NA	NA	NA	NA	NA	NA	NA	NA	NA	NA	NA	NA	NA	NA	NA	NA	NA
DNAH14	1.635	0.712	dynein, axonemal, heavy chain 14	UP	NA	UP	8	0	NA	NA	NA	NA	1	1	1	0	0	0	0	1	1	1	0	1	0	1
DNAI1	3.141	1.269	dynein, axonemal, intermediate chain 1	UP	NA	NA	NA	NA	0	-2	NA	NA	NA	NA	NA	NA	NA	NA	NA	NA	NA	NA	NA	NA	NA	NA
DNAJA4	-2.717	18.47	DnaJ (Hsp40) homolog, subfamily A, member 4	DOWN	not_DE	NA	NA	NA	NA	NA	NA	NA	NA	NA	NA	NA	NA	NA	NA	NA	NA	NA	NA	NA	NA	NA
DNAJC12	2.797	2.318	DnaJ (Hsp40) homolog, subfamily C, member 12	UP	NA	NA	NA	NA	NA	NA	NA	NA	NA	NA	NA	NA	NA	NA	NA	NA	NA	NA	NA	NA	NA	NA
DNALI1	-3.202	7.396	dynein, axonemal, light intermediate chain 1	DOWN	NA	DOWN	0	-8	NA	NA	NA	NA	-1	0	-1	-1	-1	0	0	-1	0	-1	0	-1	-1	0
DNHD1	1.653	1.531	dynein heavy chain domain 1	UP	not_DE	NA	NA	NA	NA	NA	NA	NA	NA	NA	NA	NA	NA	NA	NA	NA	NA	NA	NA	NA	NA	NA
DNMT3A	1.132	0.98	DNA (cytosine-5-)-methyltransferase 3 alpha	UP	NA	NA	NA	NA	NA	NA	NA	NA	NA	NA	NA	NA	NA	NA	NA	NA	NA	NA	NA	NA	NA	NA
DONSON	1.01	0.18	downstream neighbor of SON	UP	NA	NA	NA	NA	NA	NA	NA	NA	NA	NA	NA	NA	NA	NA	NA	NA	NA	NA	NA	NA	NA	NA
DSN1	1.265	0.547	DSN1, MIS12 kinetochore complex component	UP	NA	NA	NA	NA	NA	NA	NA	NA	NA	NA	NA	NA	NA	NA	NA	NA	NA	NA	NA	NA	NA	NA
DUSP9	2.906	0.656	dual specificity phosphatase 9	UP	NA	NA	NA	NA	NA	NA	NA	NA	NA	NA	NA	NA	NA	NA	NA	NA	NA	NA	NA	NA	NA	NA
DYSF	-1.289	5.88	dysferlin	DOWN	not_DE	NA	NA	NA	NA	NA	NA	NA	NA	NA	NA	NA	NA	NA	NA	NA	NA	NA	NA	NA	NA	NA
E2F3	1.089	0.878	E2F transcription factor 3	UP	NA	NA	NA	NA	NA	NA	NA	NA	NA	NA	NA	NA	NA	NA	NA	NA	NA	NA	NA	NA	NA	NA
E2F7	2.516	0.333	E2F transcription factor 7	UP	NA	UP	12	0	5	0	NA	NA	1	1	1	1	0	1	1	1	1	1	0	1	1	1
E2F8	2.971	1.025	E2F transcription factor 8	UP	NA	UP	9	0	3	0	NA	NA	1	1	0	0	1	1	1	1	1	1	0	0	0	1
ECM1	-1.115	1.519	extracellular matrix protein 1	DOWN	not_DE	NA	NA	NA	NA	NA	NA	NA	NA	NA	NA	NA	NA	NA	NA	NA	NA	NA	NA	NA	NA	NA
EEF1A2	3.425	4.655	eukaryotic translation elongation factor 1 alpha 2	UP	not_DE	NA	NA	NA	3	-1	NA	NA	NA	NA	NA	NA	NA	NA	NA	NA	NA	NA	NA	NA	NA	NA
EFEMP2	-2.441	81.351	EGF containing fibulin-like extracellular matrix protein 2	DOWN	not_DE	NA	NA	NA	NA	NA	0	-1	NA	NA	NA	NA	NA	NA	NA	NA	NA	NA	NA	NA	NA	NA
EGF	3.823	0.439	epidermal growth factor	UP	NA	DOWN	3	-8	NA	NA	NA	NA	0	-1	-1	-1	-1	-1	-1	1	1	0	1	-1	-1	0
EGR1	1.45	1.76	early growth response 1	UP	NA	DOWN	0	-11	0	-3	1	-1	-1	-1	0	-1	-1	-1	-1	-1	-1	-1	0	0	-1	-1
EHD3	-1.636	11.287	EH-domain containing 3	DOWN	not_DE	NA	NA	NA	NA	NA	NA	NA	NA	NA	NA	NA	NA	NA	NA	NA	NA	NA	NA	NA	NA	NA
EIF4EBP3	-2.527	18.231	eukaryotic translation initiation factor 4E binding protein 3	DOWN	NA	NA	NA	NA	NA	NA	NA	NA	NA	NA	NA	NA	NA	NA	NA	NA	NA	NA	NA	NA	NA	NA
ELOVL2	2.854	0.084	ELOVL fatty acid elongase 2	UP	NA	NA	NA	NA	NA	NA	NA	NA	NA	NA	NA	NA	NA	NA	NA	NA	NA	NA	NA	NA	NA	NA
ELTD1	-6.317	19.935	EGF, latrophilin and seven transmembrane domain containing 1	DOWN	NA	NA	NA	NA	NA	NA	NA	NA	NA	NA	NA	NA	NA	NA	NA	NA	NA	NA	NA	NA	NA	NA
EMILIN1	-4.276	42.122	elastin microfibril interfacer 1	DOWN	not_DE	NA	NA	NA	1	-2	NA	NA	NA	NA	NA	NA	NA	NA	NA	NA	NA	NA	NA	NA	NA	NA
EML4	1.339	0.056	echinoderm microtubule associated protein like 4	UP	UP	NA	NA	NA	NA	NA	NA	NA	NA	NA	NA	NA	NA	NA	NA	NA	NA	NA	NA	NA	NA	NA
EML6	1.854	0.387	echinoderm microtubule associated protein like 6	UP	NA	NA	NA	NA	NA	NA	NA	NA	NA	NA	NA	NA	NA	NA	NA	NA	NA	NA	NA	NA	NA	NA
ENG	-2.439	26.164	endoglin	DOWN	UP	NA	NA	NA	NA	NA	NA	NA	NA	NA	NA	NA	NA	NA	NA	NA	NA	NA	NA	NA	NA	NA
EPB41	2.534	5.808	erythrocyte membrane protein band 4.1 (elliptocytosis 1, RH-linked)	UP	UP	NA	NA	NA	NA	NA	NA	NA	NA	NA	NA	NA	NA	NA	NA	NA	NA	NA	NA	NA	NA	NA
EPCAM	2.288	2.99	epithelial cell adhesion molecule	UP	not_DE	NA	NA	NA	NA	NA	1	0	NA	NA	NA	NA	NA	NA	NA	NA	NA	NA	NA	NA	NA	NA
EPHA10	4.038	0.425	EPH receptor A10	UP	NA	NA	NA	NA	NA	NA	NA	NA	NA	NA	NA	NA	NA	NA	NA	NA	NA	NA	NA	NA	NA	NA
EPHA5	3.27	10.702	EPH receptor A5	UP	NA	DOWN	0	-6	NA	NA	NA	NA	-1	0	-1	0	0	-1	0	0	0	0	0	-1	-1	-1
EPHA6	4.054	0.248	EPH receptor A6	UP	NA	NA	NA	NA	NA	NA	NA	NA	NA	NA	NA	NA	NA	NA	NA	NA	NA	NA	NA	NA	NA	NA
EPSTI1	-1.01	23.601	epithelial stromal interaction 1 (breast)	DOWN	not_DE	NA	NA	NA	NA	NA	NA	NA	NA	NA	NA	NA	NA	NA	NA	NA	NA	NA	NA	NA	NA	NA
ERBB3	1.399	0.984	v-erb-b2 avian erythroblastic leukemia viral oncogene homolog 3	UP	NA	NA	NA	NA	NA	NA	NA	NA	NA	NA	NA	NA	NA	NA	NA	NA	NA	NA	NA	NA	NA	NA
ETV7	1.025	0.52	ets variant 7	UP	NA	NA	NA	NA	NA	NA	NA	NA	NA	NA	NA	NA	NA	NA	NA	NA	NA	NA	NA	NA	NA	NA
EVC2	-1.351	6.754	Ellis van Creveld syndrome 2	DOWN	NA	NA	NA	NA	NA	NA	NA	NA	NA	NA	NA	NA	NA	NA	NA	NA	NA	NA	NA	NA	NA	NA
EXO1	2.726	0.862	exonuclease 1	UP	NA	UP	12	0	5	0	NA	NA	1	1	1	1	0	1	1	1	1	1	1	1	0	1
F11R	-1.298	36.349	F11 receptor	DOWN	not_DE	NA	NA	NA	NA	NA	NA	NA	NA	NA	NA	NA	NA	NA	NA	NA	NA	NA	NA	NA	NA	NA
FABP4	-3.732	286.631	fatty acid binding protein 4, adipocyte	DOWN	DOWN	DOWN	1	-11	0	-4	NA	NA	-1	-1	-1	-1	0	0	-1	1	-1	-1	-1	-1	-1	-1
FABP6	3.454	2.783	fatty acid binding protein 6, ileal	UP	not_DE	UP	8	0	2	0	NA	NA	1	1	1	0	1	1	1	0	0	0	0	1	0	1
FADS2	-1.512	0.863	fatty acid desaturase 2	DOWN	not_DE	NA	NA	NA	NA	NA	0	-1	NA	NA	NA	NA	NA	NA	NA	NA	NA	NA	NA	NA	NA	NA
FAM109B	-2.003	4.522	family with sequence similarity 109, member B	DOWN	NA	NA	NA	NA	NA	NA	NA	NA	NA	NA	NA	NA	NA	NA	NA	NA	NA	NA	NA	NA	NA	NA
FAM111B	2.696	6.533	family with sequence similarity 111, member B	UP	NA	UP	13	0	6	0	NA	NA	1	1	1	1	1	1	1	1	1	1	1	0	1	1
FAM133A	4.187	0.14	family with sequence similarity 133, member A	UP	NA	NA	NA	NA	NA	NA	NA	NA	NA	NA	NA	NA	NA	NA	NA	NA	NA	NA	NA	NA	NA	NA
FAM161A	2.044	0.573	family with sequence similarity 161, member A	UP	NA	NA	NA	NA	NA	NA	NA	NA	NA	NA	NA	NA	NA	NA	NA	NA	NA	NA	NA	NA	NA	NA
FAM184A	3.228	2.254	family with sequence similarity 184, member A	UP	NA	DOWN	0	-11	NA	NA	NA	NA	-1	-1	-1	-1	-1	-1	-1	0	-1	-1	0	-1	0	-1
FAM212A	-2.287	1.164	family with sequence similarity 212, member A	DOWN	NA	NA	NA	NA	NA	NA	NA	NA	NA	NA	NA	NA	NA	NA	NA	NA	NA	NA	NA	NA	NA	NA
FAM222A	2.518	8.965	family with sequence similarity 222, member A	UP	NA	NA	NA	NA	NA	NA	NA	NA	NA	NA	NA	NA	NA	NA	NA	NA	NA	NA	NA	NA	NA	NA
FAM60A	1.011	0.168	family with sequence similarity 60, member A	UP	NA	NA	NA	NA	NA	NA	NA	NA	NA	NA	NA	NA	NA	NA	NA	NA	NA	NA	NA	NA	NA	NA
FAM65A	-1.052	8.402	family with sequence similarity 65, member A	DOWN	not_DE	NA	NA	NA	NA	NA	NA	NA	NA	NA	NA	NA	NA	NA	NA	NA	NA	NA	NA	NA	NA	NA
FAM81A	2.009	6.302	family with sequence similarity 81, member A	UP	NA	NA	NA	NA	NA	NA	NA	NA	NA	NA	NA	NA	NA	NA	NA	NA	NA	NA	NA	NA	NA	NA
FAM83E	1.171	0.072	family with sequence similarity 83, member E	UP	not_DE	NA	NA	NA	NA	NA	NA	NA	NA	NA	NA	NA	NA	NA	NA	NA	NA	NA	NA	NA	NA	NA
FBLIM1	-2.05	41.987	filamin binding LIM protein 1	DOWN	not_DE	NA	NA	NA	NA	NA	NA	NA	NA	NA	NA	NA	NA	NA	NA	NA	NA	NA	NA	NA	NA	NA
FBLN5	-2.959	19.833	fibulin 5	DOWN	not_DE	DOWN	0	-12	0	-4	NA	NA	-1	-1	-1	0	-1	-1	-1	-1	-1	-1	0	-1	-1	-1
FBN2	-3.622	49.837	fibrillin 2	DOWN	not_DE	NA	NA	NA	4	0	NA	NA	NA	NA	NA	NA	NA	NA	NA	NA	NA	NA	NA	NA	NA	NA
FBXL16	1.475	0.44	F-box and leucine-rich repeat protein 16	UP	NA	NA	NA	NA	NA	NA	NA	NA	NA	NA	NA	NA	NA	NA	NA	NA	NA	NA	NA	NA	NA	NA
FBXL7	-1.508	14.01	F-box and leucine-rich repeat protein 7	DOWN	NA	NA	NA	NA	0	-2	NA	NA	NA	NA	NA	NA	NA	NA	NA	NA	NA	NA	NA	NA	NA	NA
FCGRT	-1.039	15.681	Fc fragment of IgG, receptor, transporter, alpha	DOWN	not_DE	NA	NA	NA	NA	NA	NA	NA	NA	NA	NA	NA	NA	NA	NA	NA	NA	NA	NA	NA	NA	NA
FES	-4.282	6.125	feline sarcoma oncogene	DOWN	not_DE	NA	NA	NA	NA	NA	NA	NA	NA	NA	NA	NA	NA	NA	NA	NA	NA	NA	NA	NA	NA	NA
FEZ1	-4.169	48.675	fasciculation and elongation protein zeta 1 (zygin I)	DOWN	NA	DOWN	1	-10	1	-2	NA	NA	-1	-1	-1	1	-1	0	-1	-1	-1	0	-1	-1	0	-1
FGF12	2.536	0.363	fibroblast growth factor 12	UP	NA	NA	NA	NA	NA	NA	NA	NA	NA	NA	NA	NA	NA	NA	NA	NA	NA	NA	NA	NA	NA	NA
FGF13	3.243	0.356	fibroblast growth factor 13	UP	NA	NA	NA	NA	NA	NA	NA	NA	NA	NA	NA	NA	NA	NA	NA	NA	NA	NA	NA	NA	NA	NA
FGFR4	3.205	1.928	fibroblast growth factor receptor 4	UP	not_DE	NA	NA	NA	0	-2	NA	NA	NA	NA	NA	NA	NA	NA	NA	NA	NA	NA	NA	NA	NA	NA
FKBP11	-1.335	22.961	FK506 binding protein 11, 19 kDa	DOWN	not_DE	NA	NA	NA	NA	NA	NA	NA	NA	NA	NA	NA	NA	NA	NA	NA	NA	NA	NA	NA	NA	NA
FLI1	-1.758	37.693	Fli-1 proto-oncogene, ETS transcription factor	DOWN	NA	NA	NA	NA	NA	NA	NA	NA	NA	NA	NA	NA	NA	NA	NA	NA	NA	NA	NA	NA	NA	NA
FLRT2	-1.856	17.278	fibronectin leucine rich transmembrane protein 2	DOWN	NA	DOWN	1	-10	NA	NA	NA	NA	-1	-1	-1	1	-1	-1	-1	-1	0	0	0	-1	-1	-1
FMNL2	1.055	0.297	formin-like 2	UP	not_DE	NA	NA	NA	NA	NA	0	-1	NA	NA	NA	NA	NA	NA	NA	NA	NA	NA	NA	NA	NA	NA
FN1	-2.873	12.797	fibronectin 1	DOWN	UP	NA	NA	NA	2	0	1	-1	NA	NA	NA	NA	NA	NA	NA	NA	NA	NA	NA	NA	NA	NA
FNDC4	-2.362	14.272	fibronectin type III domain containing 4	DOWN	NA	NA	NA	NA	NA	NA	NA	NA	NA	NA	NA	NA	NA	NA	NA	NA	NA	NA	NA	NA	NA	NA
FOXA1	4.067	5.659	forkhead box A1	UP	not_DE	NA	NA	NA	1	-1	NA	NA	NA	NA	NA	NA	NA	NA	NA	NA	NA	NA	NA	NA	NA	NA
FOXO6	2.592	2.548	forkhead box O6	UP	NA	NA	NA	NA	NA	NA	NA	NA	NA	NA	NA	NA	NA	NA	NA	NA	NA	NA	NA	NA	NA	NA
FZD5	1.045	0.055	frizzled family receptor 5	UP	NA	NA	NA	NA	NA	NA	NA	NA	NA	NA	NA	NA	NA	NA	NA	NA	NA	NA	NA	NA	NA	NA
G000710	5.051	0.279		UP	NA	NA	NA	NA	NA	NA	NA	NA	NA	NA	NA	NA	NA	NA	NA	NA	NA	NA	NA	NA	NA	NA
G001198	7.373	0.14		UP	NA	NA	NA	NA	NA	NA	NA	NA	NA	NA	NA	NA	NA	NA	NA	NA	NA	NA	NA	NA	NA	NA
G002152	6.672	0.523		UP	NA	NA	NA	NA	NA	NA	NA	NA	NA	NA	NA	NA	NA	NA	NA	NA	NA	NA	NA	NA	NA	NA
G003212	5.699	0.192		UP	NA	NA	NA	NA	NA	NA	NA	NA	NA	NA	NA	NA	NA	NA	NA	NA	NA	NA	NA	NA	NA	NA
G004557	4.689	0.052		UP	NA	NA	NA	NA	NA	NA	NA	NA	NA	NA	NA	NA	NA	NA	NA	NA	NA	NA	NA	NA	NA	NA
G005343	3.854	0.222		UP	NA	NA	NA	NA	NA	NA	NA	NA	NA	NA	NA	NA	NA	NA	NA	NA	NA	NA	NA	NA	NA	NA
G006412	4.924	0.073		UP	NA	NA	NA	NA	NA	NA	NA	NA	NA	NA	NA	NA	NA	NA	NA	NA	NA	NA	NA	NA	NA	NA
G013016	6.412	0.409		UP	NA	NA	NA	NA	NA	NA	NA	NA	NA	NA	NA	NA	NA	NA	NA	NA	NA	NA	NA	NA	NA	NA
G013455	4.39	1.489		UP	NA	NA	NA	NA	NA	NA	NA	NA	NA	NA	NA	NA	NA	NA	NA	NA	NA	NA	NA	NA	NA	NA
G020468	2.147	1.365		UP	NA	NA	NA	NA	NA	NA	NA	NA	NA	NA	NA	NA	NA	NA	NA	NA	NA	NA	NA	NA	NA	NA
G023147	7.15	0.919		UP	NA	NA	NA	NA	NA	NA	NA	NA	NA	NA	NA	NA	NA	NA	NA	NA	NA	NA	NA	NA	NA	NA
G026474	6.203	0.454		UP	NA	NA	NA	NA	NA	NA	NA	NA	NA	NA	NA	NA	NA	NA	NA	NA	NA	NA	NA	NA	NA	NA
G031638	4.696	0.542		UP	NA	NA	NA	NA	NA	NA	NA	NA	NA	NA	NA	NA	NA	NA	NA	NA	NA	NA	NA	NA	NA	NA
G039086	3.718	0.602		UP	NA	NA	NA	NA	NA	NA	NA	NA	NA	NA	NA	NA	NA	NA	NA	NA	NA	NA	NA	NA	NA	NA
G040139	-2.556	1.861		DOWN	NA	NA	NA	NA	NA	NA	NA	NA	NA	NA	NA	NA	NA	NA	NA	NA	NA	NA	NA	NA	NA	NA
G043270	5.534	0.253		UP	NA	NA	NA	NA	NA	NA	NA	NA	NA	NA	NA	NA	NA	NA	NA	NA	NA	NA	NA	NA	NA	NA
G044173	2.608	0.382		UP	NA	NA	NA	NA	NA	NA	NA	NA	NA	NA	NA	NA	NA	NA	NA	NA	NA	NA	NA	NA	NA	NA
G055739	4.761	0.441		UP	NA	NA	NA	NA	NA	NA	NA	NA	NA	NA	NA	NA	NA	NA	NA	NA	NA	NA	NA	NA	NA	NA
G058093	3.646	0.094		UP	NA	NA	NA	NA	NA	NA	NA	NA	NA	NA	NA	NA	NA	NA	NA	NA	NA	NA	NA	NA	NA	NA
G058541	3.992	0.192		UP	NA	NA	NA	NA	NA	NA	NA	NA	NA	NA	NA	NA	NA	NA	NA	NA	NA	NA	NA	NA	NA	NA
G060850	3.326	0.103		UP	NA	NA	NA	NA	NA	NA	NA	NA	NA	NA	NA	NA	NA	NA	NA	NA	NA	NA	NA	NA	NA	NA
G068528	4.348	0.038		UP	NA	NA	NA	NA	NA	NA	NA	NA	NA	NA	NA	NA	NA	NA	NA	NA	NA	NA	NA	NA	NA	NA
G069621	1.333	0.241		UP	NA	NA	NA	NA	NA	NA	NA	NA	NA	NA	NA	NA	NA	NA	NA	NA	NA	NA	NA	NA	NA	NA
G070151	2.884	0.227		UP	NA	NA	NA	NA	NA	NA	NA	NA	NA	NA	NA	NA	NA	NA	NA	NA	NA	NA	NA	NA	NA	NA
G074630	3.585	1.712		UP	NA	NA	NA	NA	NA	NA	NA	NA	NA	NA	NA	NA	NA	NA	NA	NA	NA	NA	NA	NA	NA	NA
G082125	4.176	0.062		UP	NA	NA	NA	NA	NA	NA	NA	NA	NA	NA	NA	NA	NA	NA	NA	NA	NA	NA	NA	NA	NA	NA
G084439	-2.778	11.715		DOWN	NA	NA	NA	NA	NA	NA	NA	NA	NA	NA	NA	NA	NA	NA	NA	NA	NA	NA	NA	NA	NA	NA
G085676	3.612	6.512		UP	NA	NA	NA	NA	NA	NA	NA	NA	NA	NA	NA	NA	NA	NA	NA	NA	NA	NA	NA	NA	NA	NA
G086527	5.558	0.111		UP	NA	NA	NA	NA	NA	NA	NA	NA	NA	NA	NA	NA	NA	NA	NA	NA	NA	NA	NA	NA	NA	NA
G088597	1.781	0.232		UP	NA	NA	NA	NA	NA	NA	NA	NA	NA	NA	NA	NA	NA	NA	NA	NA	NA	NA	NA	NA	NA	NA
G090163	5.607	0.42		UP	NA	NA	NA	NA	NA	NA	NA	NA	NA	NA	NA	NA	NA	NA	NA	NA	NA	NA	NA	NA	NA	NA
G0S2	-2.507	237.098	G0/G1switch 2	DOWN	NA	NA	NA	NA	NA	NA	0	-1	NA	NA	NA	NA	NA	NA	NA	NA	NA	NA	NA	NA	NA	NA
GABRD	4.807	5.237	gamma-aminobutyric acid (GABA) A receptor, delta	UP	NA	UP	10	0	2	0	NA	NA	1	1	1	1	1	1	0	1	1	0	0	1	1	0
GAD1	2.086	6.623	glutamate decarboxylase 1 (brain, 67kDa)	UP	NA	NA	NA	NA	4	-1	NA	NA	NA	NA	NA	NA	NA	NA	NA	NA	NA	NA	NA	NA	NA	NA
GALNT13	4.065	0.075	UDP-N-acetyl-alpha-D-galactosamine:polypeptide N-acetylgalactosaminyltransferase 13 (GalNAc-T13)	UP	NA	DOWN	0	-7	NA	NA	NA	NA	-1	0	-1	0	-1	0	0	0	-1	-1	0	-1	0	-1
GAREML	2.221	2.645	GRB2 associated, regulator of MAPK1-like	UP	NA	NA	NA	NA	NA	NA	NA	NA	NA	NA	NA	NA	NA	NA	NA	NA	NA	NA	NA	NA	NA	NA
GATA2	2.759	0.105	GATA binding protein 2	UP	NA	NA	NA	NA	0	-3	1	0	NA	NA	NA	NA	NA	NA	NA	NA	NA	NA	NA	NA	NA	NA
GCNT2	2.835	1.674	glucosaminyl (N-acetyl) transferase 2, I-branching enzyme (I blood group)	UP	NA	NA	NA	NA	1	-1	NA	NA	NA	NA	NA	NA	NA	NA	NA	NA	NA	NA	NA	NA	NA	NA
GFI1	2.233	0.446	growth factor independent 1 transcription repressor	UP	NA	NA	NA	NA	NA	NA	NA	NA	NA	NA	NA	NA	NA	NA	NA	NA	NA	NA	NA	NA	NA	NA
GJB2	-4.019	62.82	gap junction protein, beta 2, 26kDa	DOWN	NA	UP	7	-2	3	0	1	0	1	1	0	0	-1	1	0	-1	1	1	1	0	0	1
GLB1L	-3.021	3.917	galactosidase, beta 1-like	DOWN	NA	NA	NA	NA	NA	NA	NA	NA	NA	NA	NA	NA	NA	NA	NA	NA	NA	NA	NA	NA	NA	NA
GLP2R	2.398	0.238	glucagon-like peptide 2 receptor	UP	NA	DOWN	0	-7	0	-2	NA	NA	-1	-1	-1	0	-1	0	0	-1	0	-1	0	-1	0	0
GNG4	4.068	7.473	guanine nucleotide binding protein (G protein), gamma 4	UP	not_DE	NA	NA	NA	3	0	NA	NA	NA	NA	NA	NA	NA	NA	NA	NA	NA	NA	NA	NA	NA	NA
GOLGA8A	1.309	33.456	golgin A8 family, member A	UP	NA	NA	NA	NA	NA	NA	NA	NA	NA	NA	NA	NA	NA	NA	NA	NA	NA	NA	NA	NA	NA	NA
GPR160	4.414	2.64	G protein-coupled receptor 160	UP	NA	NA	NA	NA	NA	NA	1	0	NA	NA	NA	NA	NA	NA	NA	NA	NA	NA	NA	NA	NA	NA
GPR19	1.877	0.756	G protein-coupled receptor 19	UP	NA	UP	11	0	NA	NA	NA	NA	1	1	1	1	0	1	1	1	1	1	0	1	0	1
GPX3	-1.288	180.29	glutathione peroxidase 3 (plasma)	DOWN	DOWN	DOWN	0	-10	0	-6	0	-1	-1	-1	-1	-1	-1	0	-1	0	-1	-1	-1	-1	0	0
GPX7	-2.219	20.783	glutathione peroxidase 7	DOWN	not_DE	NA	NA	NA	NA	NA	NA	NA	NA	NA	NA	NA	NA	NA	NA	NA	NA	NA	NA	NA	NA	NA
GRIK4	2.786	0.138	glutamate receptor, ionotropic, kainate 4	UP	NA	NA	NA	NA	NA	NA	NA	NA	NA	NA	NA	NA	NA	NA	NA	NA	NA	NA	NA	NA	NA	NA
GRIN2D	1.617	1.979	glutamate receptor, ionotropic, N-methyl D-aspartate 2D	UP	NA	UP	10	0	4	0	NA	NA	1	1	1	1	0	1	1	0	1	1	0	1	0	1
GSE1	1.957	11.139	Gse1 coiled-coil protein	UP	NA	NA	NA	NA	NA	NA	NA	NA	NA	NA	NA	NA	NA	NA	NA	NA	NA	NA	NA	NA	NA	NA
GSPT2	-1.197	13.401	G1 to S phase transition 2	DOWN	UP	NA	NA	NA	NA	NA	NA	NA	NA	NA	NA	NA	NA	NA	NA	NA	NA	NA	NA	NA	NA	NA
GYPC	-2.788	109.024	glycophorin C (Gerbich blood group)	DOWN	not_DE	DOWN	1	-9	0	-4	NA	NA	-1	-1	-1	-1	-1	1	0	0	-1	-1	0	-1	0	-1
HAP1	3.903	4.311	huntingtin-associated protein 1	UP	NA	NA	NA	NA	2	-1	NA	NA	NA	NA	NA	NA	NA	NA	NA	NA	NA	NA	NA	NA	NA	NA
HBG2	8.032	3.115	hemoglobin, gamma G	UP	not_DE	NA	NA	NA	NA	NA	0	-1	NA	NA	NA	NA	NA	NA	NA	NA	NA	NA	NA	NA	NA	NA
HDAC9	1.859	0.273	histone deacetylase 9	UP	NA	NA	NA	NA	NA	NA	NA	NA	NA	NA	NA	NA	NA	NA	NA	NA	NA	NA	NA	NA	NA	NA
HELLS	2.105	0.729	helicase, lymphoid-specific	UP	not_DE	UP	9	-1	3	0	NA	NA	1	1	1	1	-1	0	0	1	1	1	0	1	0	1
HIC1	-4.377	14.299	hypermethylated in cancer 1	DOWN	NA	NA	NA	NA	NA	NA	0	-1	NA	NA	NA	NA	NA	NA	NA	NA	NA	NA	NA	NA	NA	NA
HIST1H1A	-3.229	80.395	histone cluster 1, H1a	DOWN	UP	NA	NA	NA	NA	NA	NA	NA	NA	NA	NA	NA	NA	NA	NA	NA	NA	NA	NA	NA	NA	NA
HIST1H1T	6.217	7.567	histone cluster 1, H1t	UP	NA	NA	NA	NA	NA	NA	NA	NA	NA	NA	NA	NA	NA	NA	NA	NA	NA	NA	NA	NA	NA	NA
HIST1H2BA	3.728	33.385	histone cluster 1, H2ba	UP	NA	NA	NA	NA	NA	NA	NA	NA	NA	NA	NA	NA	NA	NA	NA	NA	NA	NA	NA	NA	NA	NA
HIST1H3E	-2.823	64.399	histone cluster 1, H3e	DOWN	NA	NA	NA	NA	NA	NA	1	0	NA	NA	NA	NA	NA	NA	NA	NA	NA	NA	NA	NA	NA	NA
HIST1H3G	-1.602	337.035	histone cluster 1, H3g	DOWN	NA	NA	NA	NA	NA	NA	0	-1	NA	NA	NA	NA	NA	NA	NA	NA	NA	NA	NA	NA	NA	NA
HIST1H4F	-3.738	117.352	histone cluster 1, H4f	DOWN	NA	NA	NA	NA	NA	NA	NA	NA	NA	NA	NA	NA	NA	NA	NA	NA	NA	NA	NA	NA	NA	NA
HIST1H4I	-1.097	130.532	histone cluster 1, H4i	DOWN	not_DE	NA	NA	NA	NA	NA	NA	NA	NA	NA	NA	NA	NA	NA	NA	NA	NA	NA	NA	NA	NA	NA
HIST2H2BE	1.269	0.336	histone cluster 2, H2be	UP	NA	NA	NA	NA	NA	NA	NA	NA	NA	NA	NA	NA	NA	NA	NA	NA	NA	NA	NA	NA	NA	NA
HMGB2	1.734	1.947	high mobility group box 2	UP	not_DE	NA	NA	NA	NA	NA	NA	NA	NA	NA	NA	NA	NA	NA	NA	NA	NA	NA	NA	NA	NA	NA
HMX3	4.197	0.349	H6 family homeobox 3	UP	not_DE	NA	NA	NA	NA	NA	NA	NA	NA	NA	NA	NA	NA	NA	NA	NA	NA	NA	NA	NA	NA	NA
HNF4G	3.429	0.404	hepatocyte nuclear factor 4, gamma	UP	not_DE	NA	NA	NA	NA	NA	NA	NA	NA	NA	NA	NA	NA	NA	NA	NA	NA	NA	NA	NA	NA	NA
HNRNPH1	1.008	0.7	heterogeneous nuclear ribonucleoprotein H1 (H)	UP	not_DE	NA	NA	NA	NA	NA	1	0	NA	NA	NA	NA	NA	NA	NA	NA	NA	NA	NA	NA	NA	NA
HOOK1	2.366	4.038	hook microtubule-tethering protein 1	UP	not_DE	NA	NA	NA	NA	NA	NA	NA	NA	NA	NA	NA	NA	NA	NA	NA	NA	NA	NA	NA	NA	NA
HOXA6	3.326	1.113	homeobox A6	UP	NA	NA	NA	NA	NA	NA	NA	NA	NA	NA	NA	NA	NA	NA	NA	NA	NA	NA	NA	NA	NA	NA
HOXB13	6.341	0.323	homeobox B13	UP	NA	UP	8	-1	2	0	NA	NA	0	1	0	1	0	0	1	1	1	1	1	-1	0	1
HOXB8	2.698	0.652	homeobox B8	UP	NA	NA	NA	NA	2	-1	0	-1	NA	NA	NA	NA	NA	NA	NA	NA	NA	NA	NA	NA	NA	NA
HOXB9	5.049	0.199	homeobox B9	UP	NA	NA	NA	NA	3	-1	NA	NA	NA	NA	NA	NA	NA	NA	NA	NA	NA	NA	NA	NA	NA	NA
HOXC13	6.07	0.408	homeobox C13	UP	NA	UP	8	0	3	0	NA	NA	1	1	0	1	0	1	1	0	1	1	0	0	0	1
HOXD13	5.823	0.11	homeobox D13	UP	not_DE	NA	NA	NA	2	0	0	-1	NA	NA	NA	NA	NA	NA	NA	NA	NA	NA	NA	NA	NA	NA
HSPB6	-6.36	319.99	heat shock protein, alpha-crystallin-related, B6	DOWN	DOWN	DOWN	0	-13	0	-8	0	-1	-1	-1	-1	-1	-1	-1	-1	0	-1	-1	-1	-1	-1	-1
HSPG2	-1.069	1.166	heparan sulfate proteoglycan 2	DOWN	not_DE	NA	NA	NA	NA	NA	NA	NA	NA	NA	NA	NA	NA	NA	NA	NA	NA	NA	NA	NA	NA	NA
HTR6	5.366	0.912	5-hydroxytryptamine (serotonin) receptor 6, G protein-coupled	UP	NA	NA	NA	NA	NA	NA	NA	NA	NA	NA	NA	NA	NA	NA	NA	NA	NA	NA	NA	NA	NA	NA
HTRA1	-2.11	5.62	HtrA serine peptidase 1	DOWN	not_DE	NA	NA	NA	NA	NA	NA	NA	NA	NA	NA	NA	NA	NA	NA	NA	NA	NA	NA	NA	NA	NA
ICAM5	2.06	0.196	intercellular adhesion molecule 5, telencephalin	UP	NA	NA	NA	NA	1	-1	NA	NA	NA	NA	NA	NA	NA	NA	NA	NA	NA	NA	NA	NA	NA	NA
IFFO1	-1.131	19.67	intermediate filament family orphan 1	DOWN	NA	NA	NA	NA	NA	NA	NA	NA	NA	NA	NA	NA	NA	NA	NA	NA	NA	NA	NA	NA	NA	NA
IGF2	-2.652	165.25	insulin-like growth factor 2 (somatomedin A)	DOWN	not_DE	DOWN	0	-8	NA	NA	NA	NA	0	-1	0	0	-1	-1	-1	-1	0	0	-1	0	-1	-1
IGF2BP3	2.263	0.493	insulin-like growth factor 2 mRNA binding protein 3	UP	not_DE	UP	11	0	4	0	NA	NA	1	0	1	1	1	1	1	1	1	1	0	1	0	1
IGFBP7	-3.605	4.832	insulin-like growth factor binding protein 7	DOWN	not_DE	NA	NA	NA	NA	NA	NA	NA	NA	NA	NA	NA	NA	NA	NA	NA	NA	NA	NA	NA	NA	NA
IGFL4	3.753	0.102	IGF-like family member 4	UP	NA	NA	NA	NA	NA	NA	NA	NA	NA	NA	NA	NA	NA	NA	NA	NA	NA	NA	NA	NA	NA	NA
IL1R1	-1.242	25.595	interleukin 1 receptor, type I	DOWN	NA	NA	NA	NA	NA	NA	NA	NA	NA	NA	NA	NA	NA	NA	NA	NA	NA	NA	NA	NA	NA	NA
IL4R	-1.45	0.502	interleukin 4 receptor	DOWN	NA	NA	NA	NA	NA	NA	NA	NA	NA	NA	NA	NA	NA	NA	NA	NA	NA	NA	NA	NA	NA	NA
IMMP2L	1.052	0.335	IMP2 inner mitochondrial membrane peptidase-like (S. cerevisiae)	UP	NA	NA	NA	NA	NA	NA	NA	NA	NA	NA	NA	NA	NA	NA	NA	NA	NA	NA	NA	NA	NA	NA
INADL	1.203	0.249	InaD-like (Drosophila)	UP	DOWN	NA	NA	NA	NA	NA	NA	NA	NA	NA	NA	NA	NA	NA	NA	NA	NA	NA	NA	NA	NA	NA
INPP5F	-5.082	21.536	inositol polyphosphate-5-phosphatase F	DOWN	NA	NA	NA	NA	NA	NA	0	-1	NA	NA	NA	NA	NA	NA	NA	NA	NA	NA	NA	NA	NA	NA
IRAK3	-3.474	17.449	interleukin-1 receptor-associated kinase 3	DOWN	NA	NA	NA	NA	NA	NA	NA	NA	NA	NA	NA	NA	NA	NA	NA	NA	NA	NA	NA	NA	NA	NA
ISL2	4.064	2.057	ISL LIM homeobox 2	UP	NA	NA	NA	NA	NA	NA	NA	NA	NA	NA	NA	NA	NA	NA	NA	NA	NA	NA	NA	NA	NA	NA
ITGA4	-1.363	37.141	integrin, alpha 4 (antigen CD49D, alpha 4 subunit of VLA-4 receptor)	DOWN	NA	NA	NA	NA	NA	NA	NA	NA	NA	NA	NA	NA	NA	NA	NA	NA	NA	NA	NA	NA	NA	NA
ITGA5	-1.983	76.966	integrin, alpha 5 (fibronectin receptor, alpha polypeptide)	DOWN	not_DE	NA	NA	NA	2	0	NA	NA	NA	NA	NA	NA	NA	NA	NA	NA	NA	NA	NA	NA	NA	NA
JAM3	-1.327	48.42	junctional adhesion molecule 3	DOWN	NA	DOWN	0	-8	0	-2	NA	NA	-1	-1	-1	0	0	0	-1	0	-1	-1	0	-1	0	-1
KCNG3	7.285	1.259	potassium voltage-gated channel, subfamily G, member 3	UP	NA	NA	NA	NA	NA	NA	1	0	NA	NA	NA	NA	NA	NA	NA	NA	NA	NA	NA	NA	NA	NA
KCNH3	5.817	2.849	potassium voltage-gated channel, subfamily H (eag-related), member 3	UP	NA	NA	NA	NA	NA	NA	NA	NA	NA	NA	NA	NA	NA	NA	NA	NA	NA	NA	NA	NA	NA	NA
KCNK5	4.328	4.074	potassium channel, subfamily K, member 5	UP	NA	NA	NA	NA	NA	NA	NA	NA	NA	NA	NA	NA	NA	NA	NA	NA	NA	NA	NA	NA	NA	NA
KCNQ2	4.972	8.04	potassium voltage-gated channel, KQT-like subfamily, member 2	UP	NA	NA	NA	NA	NA	NA	NA	NA	NA	NA	NA	NA	NA	NA	NA	NA	NA	NA	NA	NA	NA	NA
KCNQ5	1.137	0.136	potassium voltage-gated channel, KQT-like subfamily, member 5	UP	NA	NA	NA	NA	2	0	NA	NA	NA	NA	NA	NA	NA	NA	NA	NA	NA	NA	NA	NA	NA	NA
KCTD12	-1.501	40.633	potassium channel tetramerization domain containing 12	DOWN	not_DE	DOWN	0	-7	NA	NA	NA	NA	-1	-1	-1	0	0	0	0	0	-1	-1	0	-1	0	-1
KIAA1324L	1.772	0.166	KIAA1324-like	UP	NA	NA	NA	NA	NA	NA	NA	NA	NA	NA	NA	NA	NA	NA	NA	NA	NA	NA	NA	NA	NA	NA
KIAA1598	1.349	2.271	KIAA1598	UP	UP	NA	NA	NA	NA	NA	NA	NA	NA	NA	NA	NA	NA	NA	NA	NA	NA	NA	NA	NA	NA	NA
KIAA1683	5.217	0.358	KIAA1683	UP	NA	DOWN	0	-10	0	-3	NA	NA	-1	-1	-1	-1	0	0	-1	0	-1	-1	0	-1	-1	-1
KIAA1984	4.134	0.358		UP	NA	NA	NA	NA	NA	NA	NA	NA	NA	NA	NA	NA	NA	NA	NA	NA	NA	NA	NA	NA	NA	NA
KIF14	2.831	1.875	kinesin family member 14	UP	not_DE	UP	13	0	7	0	1	0	1	1	1	1	1	1	1	1	1	1	1	1	0	1
KIF18A	2.958	0.81	kinesin family member 18A	UP	NA	UP	11	0	3	0	NA	NA	1	1	1	1	0	1	1	1	1	1	0	1	0	1
KIF20B	1.437	0.316	kinesin family member 20B	UP	not_DE	NA	NA	NA	NA	NA	NA	NA	NA	NA	NA	NA	NA	NA	NA	NA	NA	NA	NA	NA	NA	NA
KIF23	1.766	2.285	kinesin family member 23	UP	not_DE	UP	9	0	5	0	1	0	1	1	1	1	0	0	0	1	1	1	0	1	0	1
KIF26A	2.682	6.011	kinesin family member 26A	UP	not_DE	DOWN	0	-9	0	-2	0	-1	-1	-1	-1	0	-1	0	-1	0	-1	-1	0	-1	0	-1
KIF5C	2.085	31.416	kinesin family member 5C	UP	NA	NA	NA	NA	NA	NA	NA	NA	NA	NA	NA	NA	NA	NA	NA	NA	NA	NA	NA	NA	NA	NA
KIFC2	1.045	0.583	kinesin family member C2	UP	NA	UP	9	0	NA	NA	NA	NA	1	1	1	0	1	0	0	1	1	1	0	1	0	1
KLHL15	1.546	0.131	kelch-like family member 15	UP	NA	NA	NA	NA	NA	NA	NA	NA	NA	NA	NA	NA	NA	NA	NA	NA	NA	NA	NA	NA	NA	NA
KRBOX1	-3.18	5.194	KRAB box domain containing 1	DOWN	NA	NA	NA	NA	NA	NA	NA	NA	NA	NA	NA	NA	NA	NA	NA	NA	NA	NA	NA	NA	NA	NA
KRT80	2.286	10.139	keratin 80	UP	DOWN	UP	8	-3	3	0	NA	NA	1	0	1	-1	-1	0	1	-1	1	1	0	1	1	1
KSR2	3.154	0.296	kinase suppressor of ras 2	UP	NA	NA	NA	NA	NA	NA	NA	NA	NA	NA	NA	NA	NA	NA	NA	NA	NA	NA	NA	NA	NA	NA
LARS	1.028	0.41	leucyl-tRNA synthetase	UP	not_DE	NA	NA	NA	NA	NA	NA	NA	NA	NA	NA	NA	NA	NA	NA	NA	NA	NA	NA	NA	NA	NA
LAYN	-2.76	26.6	layilin	DOWN	NA	NA	NA	NA	NA	NA	NA	NA	NA	NA	NA	NA	NA	NA	NA	NA	NA	NA	NA	NA	NA	NA
LCLAT1	1.061	0.438	lysocardiolipin acyltransferase 1	UP	not_DE	NA	NA	NA	NA	NA	1	0	NA	NA	NA	NA	NA	NA	NA	NA	NA	NA	NA	NA	NA	NA
LHX1	5.196	2.274	LIM homeobox 1	UP	NA	NA	NA	NA	NA	NA	NA	NA	NA	NA	NA	NA	NA	NA	NA	NA	NA	NA	NA	NA	NA	NA
LHX4	4.75	0.352	LIM homeobox 4	UP	NA	NA	NA	NA	NA	NA	NA	NA	NA	NA	NA	NA	NA	NA	NA	NA	NA	NA	NA	NA	NA	NA
LHX6	1.876	0.477	LIM homeobox 6	UP	NA	NA	NA	NA	NA	NA	NA	NA	NA	NA	NA	NA	NA	NA	NA	NA	NA	NA	NA	NA	NA	NA
LHX9	6.565	6.879	LIM homeobox 9	UP	NA	NA	NA	NA	NA	NA	NA	NA	NA	NA	NA	NA	NA	NA	NA	NA	NA	NA	NA	NA	NA	NA
LIN28B	5.603	0.448	lin-28 homolog B (C. elegans)	UP	NA	NA	NA	NA	NA	NA	NA	NA	NA	NA	NA	NA	NA	NA	NA	NA	NA	NA	NA	NA	NA	NA
LONRF2	3.415	2.535	LON peptidase N-terminal domain and ring finger 2	UP	NA	DOWN	1	-8	0	-4	NA	NA	-1	0	-1	-1	0	-1	-1	0	0	-1	0	-1	1	-1
LONRF3	1.414	0.141	LON peptidase N-terminal domain and ring finger 3	UP	NA	DOWN	0	-6	NA	NA	0	-1	-1	-1	0	0	-1	0	0	0	0	-1	-1	0	-1	0
LPPR3	1.754	3.054		UP	not_DE	NA	NA	NA	NA	NA	NA	NA	NA	NA	NA	NA	NA	NA	NA	NA	NA	NA	NA	NA	NA	NA
LRP1	-1.297	0.989	low density lipoprotein receptor-related protein 1	DOWN	not_DE	NA	NA	NA	NA	NA	NA	NA	NA	NA	NA	NA	NA	NA	NA	NA	NA	NA	NA	NA	NA	NA
LRP10	-1.331	0.594	low density lipoprotein receptor-related protein 10	DOWN	not_DE	NA	NA	NA	NA	NA	NA	NA	NA	NA	NA	NA	NA	NA	NA	NA	NA	NA	NA	NA	NA	NA
LRPPRC	1.205	1.104	leucine-rich pentatricopeptide repeat containing	UP	not_DE	NA	NA	NA	NA	NA	NA	NA	NA	NA	NA	NA	NA	NA	NA	NA	NA	NA	NA	NA	NA	NA
LRRTM4	1.01	0.576	leucine rich repeat transmembrane neuronal 4	UP	NA	NA	NA	NA	NA	NA	NA	NA	NA	NA	NA	NA	NA	NA	NA	NA	NA	NA	NA	NA	NA	NA
LSAMP	1.195	0.106	limbic system-associated membrane protein	UP	not_DE	DOWN	2	-9	NA	NA	NA	NA	-1	0	-1	1	1	-1	-1	0	-1	-1	-1	-1	0	-1
LTBP1	-1.422	106.149	latent transforming growth factor beta binding protein 1	DOWN	UP	NA	NA	NA	NA	NA	NA	NA	NA	NA	NA	NA	NA	NA	NA	NA	NA	NA	NA	NA	NA	NA
LTBP2	-2.888	5.933	latent transforming growth factor beta binding protein 2	DOWN	UP	NA	NA	NA	NA	NA	NA	NA	NA	NA	NA	NA	NA	NA	NA	NA	NA	NA	NA	NA	NA	NA
LYNX1	-1.806	24.751	Ly6/neurotoxin 1	DOWN	NA	DOWN	0	-9	0	-3	0	-1	-1	-1	-1	-1	0	-1	-1	0	-1	0	0	-1	0	-1
MAATS1	3.223	2.69	MYCBP-associated, testis expressed 1	UP	NA	NA	NA	NA	0	-3	NA	NA	NA	NA	NA	NA	NA	NA	NA	NA	NA	NA	NA	NA	NA	NA
MAF	-2.754	19.596	v-maf avian musculoaponeurotic fibrosarcoma oncogene homolog	DOWN	not_DE	NA	NA	NA	NA	NA	NA	NA	NA	NA	NA	NA	NA	NA	NA	NA	NA	NA	NA	NA	NA	NA
MAFA	4.647	0.448	v-maf avian musculoaponeurotic fibrosarcoma oncogene homolog A	UP	NA	NA	NA	NA	NA	NA	NA	NA	NA	NA	NA	NA	NA	NA	NA	NA	NA	NA	NA	NA	NA	NA
MAGEA1	5.541	0.246	melanoma antigen family A, 1 (directs expression of antigen MZ2-E)	UP	not_DE	NA	NA	NA	NA	NA	NA	NA	NA	NA	NA	NA	NA	NA	NA	NA	NA	NA	NA	NA	NA	NA
MAGEC1	6.527	1.101	melanoma antigen family C, 1	UP	NA	NA	NA	NA	NA	NA	NA	NA	NA	NA	NA	NA	NA	NA	NA	NA	NA	NA	NA	NA	NA	NA
MAGEC2	9.121	1.799	melanoma antigen family C, 2	UP	not_DE	NA	NA	NA	NA	NA	NA	NA	NA	NA	NA	NA	NA	NA	NA	NA	NA	NA	NA	NA	NA	NA
MAGI1	1.232	0.909	membrane associated guanylate kinase, WW and PDZ domain containing 1	UP	not_DE	NA	NA	NA	NA	NA	NA	NA	NA	NA	NA	NA	NA	NA	NA	NA	NA	NA	NA	NA	NA	NA
MALL	-1.001	57.073	mal, T-cell differentiation protein-like	DOWN	NA	NA	NA	NA	1	-1	NA	NA	NA	NA	NA	NA	NA	NA	NA	NA	NA	NA	NA	NA	NA	NA
MANEAL	2.808	3.531	mannosidase, endo-alpha-like	UP	NA	NA	NA	NA	NA	NA	NA	NA	NA	NA	NA	NA	NA	NA	NA	NA	NA	NA	NA	NA	NA	NA
MAP1A	-2.371	76.333	microtubule-associated protein 1A	DOWN	not_DE	NA	NA	NA	0	-2	NA	NA	NA	NA	NA	NA	NA	NA	NA	NA	NA	NA	NA	NA	NA	NA
MAP1LC3A	-1.48	44.5	microtubule-associated protein 1 light chain 3 alpha	DOWN	NA	NA	NA	NA	NA	NA	NA	NA	NA	NA	NA	NA	NA	NA	NA	NA	NA	NA	NA	NA	NA	NA
MAPT	2.945	7.833	microtubule-associated protein tau	UP	UP	NA	NA	NA	0	-2	NA	NA	NA	NA	NA	NA	NA	NA	NA	NA	NA	NA	NA	NA	NA	NA
MAST1	3.361	12.516	microtubule associated serine/threonine kinase 1	UP	NA	UP	5	0	NA	NA	NA	NA	1	0	0	0	0	0	1	0	1	1	0	0	0	1
MAST4	-1.112	11.217	microtubule associated serine/threonine kinase family member 4	DOWN	NA	NA	NA	NA	NA	NA	NA	NA	NA	NA	NA	NA	NA	NA	NA	NA	NA	NA	NA	NA	NA	NA
MCF2L	2	1.808	MCF.2 cell line derived transforming sequence-like	UP	not_DE	NA	NA	NA	NA	NA	1	0	NA	NA	NA	NA	NA	NA	NA	NA	NA	NA	NA	NA	NA	NA
MCM2	1.213	0.472	minichromosome maintenance complex component 2	UP	UP	UP	10	0	2	0	NA	NA	1	1	1	1	0	0	1	1	1	1	0	1	0	1
MCM8	2.015	1.653	minichromosome maintenance complex component 8	UP	NA	NA	NA	NA	NA	NA	NA	NA	NA	NA	NA	NA	NA	NA	NA	NA	NA	NA	NA	NA	NA	NA
MCOLN3	2.217	2.885	mucolipin 3	UP	NA	NA	NA	NA	NA	NA	NA	NA	NA	NA	NA	NA	NA	NA	NA	NA	NA	NA	NA	NA	NA	NA
MECOM	2.279	4.817	MDS1 and EVI1 complex locus	UP	not_DE	NA	NA	NA	NA	NA	NA	NA	NA	NA	NA	NA	NA	NA	NA	NA	NA	NA	NA	NA	NA	NA
MED12L	2.188	4.186	mediator complex subunit 12-like	UP	NA	NA	NA	NA	NA	NA	NA	NA	NA	NA	NA	NA	NA	NA	NA	NA	NA	NA	NA	NA	NA	NA
MED13	1.396	0.107	mediator complex subunit 13	UP	not_DE	NA	NA	NA	NA	NA	NA	NA	NA	NA	NA	NA	NA	NA	NA	NA	NA	NA	NA	NA	NA	NA
MED30	1.22	0.492	mediator complex subunit 30	UP	NA	NA	NA	NA	NA	NA	NA	NA	NA	NA	NA	NA	NA	NA	NA	NA	NA	NA	NA	NA	NA	NA
MFGE8	-1.173	1.563	milk fat globule-EGF factor 8 protein	DOWN	not_DE	NA	NA	NA	NA	NA	NA	NA	NA	NA	NA	NA	NA	NA	NA	NA	NA	NA	NA	NA	NA	NA
MFSD7	-2.945	1.683	major facilitator superfamily domain containing 7	DOWN	NA	NA	NA	NA	NA	NA	NA	NA	NA	NA	NA	NA	NA	NA	NA	NA	NA	NA	NA	NA	NA	NA
MGAT1	-1.873	17.696	mannosyl (alpha-1,3-)-glycoprotein beta-1,2-N-acetylglucosaminyltransferase	DOWN	not_DE	NA	NA	NA	NA	NA	NA	NA	NA	NA	NA	NA	NA	NA	NA	NA	NA	NA	NA	NA	NA	NA
MIPOL1	1.108	0.077	mirror-image polydactyly 1	UP	NA	NA	NA	NA	NA	NA	NA	NA	NA	NA	NA	NA	NA	NA	NA	NA	NA	NA	NA	NA	NA	NA
MKI67	2.174	1.055	marker of proliferation Ki-67	UP	UP	UP	13	0	6	0	1	0	1	1	1	1	1	1	1	1	1	1	1	1	0	1
MKRN3	3.382	2.759	makorin ring finger protein 3	UP	NA	NA	NA	NA	NA	NA	NA	NA	NA	NA	NA	NA	NA	NA	NA	NA	NA	NA	NA	NA	NA	NA
MLF1IP	1.786	0.206		UP	NA	UP	11	0	NA	NA	NA	NA	1	1	0	0	1	1	1	1	1	1	1	0	1	1
MLK4	1.994	1.432		UP	NA	NA	NA	NA	NA	NA	NA	NA	NA	NA	NA	NA	NA	NA	NA	NA	NA	NA	NA	NA	NA	NA
MMP13	3.873	4.598	matrix metallopeptidase 13 (collagenase 3)	UP	NA	UP	8	0	5	0	1	0	1	1	1	1	0	0	0	0	1	1	0	1	1	0
MMP14	-1.621	7.76	matrix metallopeptidase 14 (membrane-inserted)	DOWN	not_DE	NA	NA	NA	NA	NA	0	-1	NA	NA	NA	NA	NA	NA	NA	NA	NA	NA	NA	NA	NA	NA
MMP2	-2.778	260.318	matrix metallopeptidase 2 (gelatinase A, 72kDa gelatinase, 72kDa type IV collagenase)	DOWN	not_DE	NA	NA	NA	NA	NA	NA	NA	NA	NA	NA	NA	NA	NA	NA	NA	NA	NA	NA	NA	NA	NA
MMP9	-4.158	72.731	matrix metallopeptidase 9 (gelatinase B, 92kDa gelatinase, 92kDa type IV collagenase)	DOWN	UP	UP	13	0	6	0	NA	NA	1	1	1	1	1	1	1	1	1	1	1	1	0	1
MNS1	2.323	5.076	meiosis-specific nuclear structural 1	UP	NA	NA	NA	NA	NA	NA	NA	NA	NA	NA	NA	NA	NA	NA	NA	NA	NA	NA	NA	NA	NA	NA
MNX1	5.5	0.143	motor neuron and pancreas homeobox 1	UP	NA	UP	7	0	NA	NA	2	0	1	1	0	0	0	0	1	0	1	1	1	0	0	1
MPHOSPH9	1.299	0.044	M-phase phosphoprotein 9	UP	not_DE	NA	NA	NA	NA	NA	NA	NA	NA	NA	NA	NA	NA	NA	NA	NA	NA	NA	NA	NA	NA	NA
MPP2	-1.174	1.109	membrane protein, palmitoylated 2 (MAGUK p55 subfamily member 2)	DOWN	NA	NA	NA	NA	0	-2	0	-1	NA	NA	NA	NA	NA	NA	NA	NA	NA	NA	NA	NA	NA	NA
MPP6	1.104	0.556	membrane protein, palmitoylated 6 (MAGUK p55 subfamily member 6)	UP	not_DE	NA	NA	NA	2	0	1	0	NA	NA	NA	NA	NA	NA	NA	NA	NA	NA	NA	NA	NA	NA
MSH6	1.191	0.653	mutS homolog 6	UP	UP	NA	NA	NA	NA	NA	NA	NA	NA	NA	NA	NA	NA	NA	NA	NA	NA	NA	NA	NA	NA	NA
MSI2	1.423	1.365	musashi RNA-binding protein 2	UP	UP	NA	NA	NA	NA	NA	1	0	NA	NA	NA	NA	NA	NA	NA	NA	NA	NA	NA	NA	NA	NA
MSTO1	1.994	0.063	misato 1, mitochondrial distribution and morphology regulator	UP	NA	NA	NA	NA	NA	NA	NA	NA	NA	NA	NA	NA	NA	NA	NA	NA	NA	NA	NA	NA	NA	NA
MT1A	-1.606	43.756	metallothionein 1A	DOWN	NA	DOWN	0	-10	0	-4	NA	NA	-1	-1	-1	-1	-1	0	0	-1	-1	-1	0	-1	-1	0
MT1E	-3.145	915.399	metallothionein 1E	DOWN	DOWN	DOWN	0	-9	NA	NA	NA	NA	0	-1	-1	0	-1	-1	-1	-1	0	-1	0	-1	-1	0
MTHFD2	1.593	0.065	methylenetetrahydrofolate dehydrogenase (NADP+ dependent) 2, methenyltetrahydrofolate cyclohydrolase	UP	not_DE	UP	6	0	NA	NA	1	0	1	1	1	0	0	0	0	0	1	1	0	0	0	1
MUC5AC	6.89	15.171	mucin 5AC, oligomeric mucus/gel-forming	UP	not_DE	NA	NA	NA	NA	NA	NA	NA	NA	NA	NA	NA	NA	NA	NA	NA	NA	NA	NA	NA	NA	NA
MXRA8	-4.571	85.563	matrix-remodelling associated 8	DOWN	not_DE	NA	NA	NA	NA	NA	NA	NA	NA	NA	NA	NA	NA	NA	NA	NA	NA	NA	NA	NA	NA	NA
MYEF2	2.245	37.138	myelin expression factor 2	UP	not_DE	NA	NA	NA	NA	NA	NA	NA	NA	NA	NA	NA	NA	NA	NA	NA	NA	NA	NA	NA	NA	NA
MYEOV	4.284	11.962	myeloma overexpressed	UP	NA	UP	8	-3	4	-1	NA	NA	1	-1	1	-1	0	1	1	-1	1	1	0	1	0	1
MYL9	-1.791	678.287	myosin, light chain 9, regulatory	DOWN	not_DE	DOWN	0	-9	0	-3	0	-1	-1	-1	-1	0	-1	0	0	0	-1	-1	-1	-1	0	-1
MYLK3	1.946	0.089	myosin light chain kinase 3	UP	UP	DOWN	0	-6	NA	NA	NA	NA	0	0	0	-1	-1	-1	-1	0	-1	-1	0	0	0	0
NAALADL1	-6.744	3.004	N-acetylated alpha-linked acidic dipeptidase-like 1	DOWN	NA	DOWN	0	-10	NA	NA	NA	NA	-1	-1	-1	0	-1	0	-1	0	-1	-1	-1	-1	0	-1
NASP	1.807	1.674	nuclear autoantigenic sperm protein (histone-binding)	UP	UP	NA	NA	NA	NA	NA	NA	NA	NA	NA	NA	NA	NA	NA	NA	NA	NA	NA	NA	NA	NA	NA
NBEA	1.922	0.66	neurobeachin	UP	NA	DOWN	0	-6	0	-3	NA	NA	-1	0	-1	-1	0	0	0	0	0	-1	0	-1	0	-1
NDN	-3.073	3.621	necdin, melanoma antigen (MAGE) family member	DOWN	NA	DOWN	0	-9	0	-2	NA	NA	-1	-1	-1	0	-1	0	-1	0	-1	-1	0	-1	0	-1
NDUFAF6	1.3	3.608	NADH dehydrogenase (ubiquinone) complex I, assembly factor 6	UP	not_DE	NA	NA	NA	NA	NA	NA	NA	NA	NA	NA	NA	NA	NA	NA	NA	NA	NA	NA	NA	NA	NA
NEK10	3.133	1.025	NIMA-related kinase 10	UP	UP	NA	NA	NA	NA	NA	NA	NA	NA	NA	NA	NA	NA	NA	NA	NA	NA	NA	NA	NA	NA	NA
NFATC4	-1.014	4.367	nuclear factor of activated T-cells, cytoplasmic, calcineurin-dependent 4	DOWN	NA	NA	NA	NA	NA	NA	NA	NA	NA	NA	NA	NA	NA	NA	NA	NA	NA	NA	NA	NA	NA	NA
NHSL1	-1.433	3.179	NHS-like 1	DOWN	not_DE	NA	NA	NA	NA	NA	NA	NA	NA	NA	NA	NA	NA	NA	NA	NA	NA	NA	NA	NA	NA	NA
NID2	-3.058	3.312	nidogen 2 (osteonidogen)	DOWN	not_DE	NA	NA	NA	NA	NA	NA	NA	NA	NA	NA	NA	NA	NA	NA	NA	NA	NA	NA	NA	NA	NA
NKAPL	-8.43	2.277	NFKB activating protein-like	DOWN	NA	DOWN	0	-13	0	-2	NA	NA	-1	-1	-1	-1	-1	-1	-1	-1	-1	-1	-1	-1	0	-1
NKD1	4.155	6.612	naked cuticle homolog 1 (Drosophila)	UP	NA	NA	NA	NA	1	-2	NA	NA	NA	NA	NA	NA	NA	NA	NA	NA	NA	NA	NA	NA	NA	NA
NKX2-4	4.613	0.073	NK2 homeobox 4	UP	NA	NA	NA	NA	NA	NA	NA	NA	NA	NA	NA	NA	NA	NA	NA	NA	NA	NA	NA	NA	NA	NA
NMU	4.048	10.059	neuromedin U	UP	NA	UP	8	-1	2	0	NA	NA	1	1	1	-1	0	0	0	0	1	1	0	1	1	1
NNMT	-1.644	2.804	nicotinamide N-methyltransferase	DOWN	UP	NA	NA	NA	NA	NA	NA	NA	NA	NA	NA	NA	NA	NA	NA	NA	NA	NA	NA	NA	NA	NA
NOVA2	-1.435	0.05	neuro-oncological ventral antigen 2	DOWN	NA	NA	NA	NA	0	-2	NA	NA	NA	NA	NA	NA	NA	NA	NA	NA	NA	NA	NA	NA	NA	NA
NPM1	1.109	0.425	nucleophosmin (nucleolar phosphoprotein B23, numatrin)	UP	UP	NA	NA	NA	NA	NA	NA	NA	NA	NA	NA	NA	NA	NA	NA	NA	NA	NA	NA	NA	NA	NA
NPPC	3.785	2.686	natriuretic peptide C	UP	NA	NA	NA	NA	1	-1	NA	NA	NA	NA	NA	NA	NA	NA	NA	NA	NA	NA	NA	NA	NA	NA
NR6A1	2.724	1.46	nuclear receptor subfamily 6, group A, member 1	UP	NA	NA	NA	NA	NA	NA	NA	NA	NA	NA	NA	NA	NA	NA	NA	NA	NA	NA	NA	NA	NA	NA
NUP107	1.003	0.138	nucleoporin 107kDa	UP	UP	NA	NA	NA	NA	NA	NA	NA	NA	NA	NA	NA	NA	NA	NA	NA	NA	NA	NA	NA	NA	NA
NUP210	4.236	15.03	nucleoporin 210kDa	UP	not_DE	NA	NA	NA	NA	NA	4	0	NA	NA	NA	NA	NA	NA	NA	NA	NA	NA	NA	NA	NA	NA
NUP62CL	2.906	3.033	nucleoporin 62kDa C-terminal like	UP	NA	NA	NA	NA	NA	NA	NA	NA	NA	NA	NA	NA	NA	NA	NA	NA	NA	NA	NA	NA	NA	NA
NUSAP1	1.993	1.169	nucleolar and spindle associated protein 1	UP	not_DE	UP	11	0	6	0	2	0	1	1	1	1	0	1	1	1	1	1	1	0	0	1
NYNRIN	-1.898	9.516	NYN domain and retroviral integrase containing	DOWN	NA	NA	NA	NA	NA	NA	0	-2	NA	NA	NA	NA	NA	NA	NA	NA	NA	NA	NA	NA	NA	NA
ONECUT1	5.135	1.123	one cut homeobox 1	UP	NA	NA	NA	NA	NA	NA	NA	NA	NA	NA	NA	NA	NA	NA	NA	NA	NA	NA	NA	NA	NA	NA
ONECUT2	4.924	0.434	one cut homeobox 2	UP	NA	UP	10	0	NA	NA	1	0	1	1	1	1	0	0	1	0	1	1	1	1	0	1
OSR1	-2.73	26.21	odd-skipped related transciption factor 1	DOWN	NA	DOWN	1	-10	0	-3	NA	NA	-1	-1	-1	-1	-1	0	0	1	-1	-1	0	-1	-1	-1
OTOF	1.06	0.085	otoferlin	UP	NA	NA	NA	NA	NA	NA	NA	NA	NA	NA	NA	NA	NA	NA	NA	NA	NA	NA	NA	NA	NA	NA
OTX1	5.449	0.195	orthodenticle homeobox 1	UP	NA	UP	9	0	4	0	NA	NA	1	1	1	0	0	0	0	1	1	1	1	1	0	1
P2RX5-TAX1BP3	1.424	2.375	P2RX5-TAX1BP3 readthrough (NMD candidate)	UP	NA	NA	NA	NA	NA	NA	NA	NA	NA	NA	NA	NA	NA	NA	NA	NA	NA	NA	NA	NA	NA	NA
PABPC1L	1.485	0.562	poly(A) binding protein, cytoplasmic 1-like	UP	not_DE	UP	9	-1	3	0	NA	NA	1	0	1	0	-1	1	1	1	1	1	0	1	0	1
PAMR1	-5.633	19.123	peptidase domain containing associated with muscle regeneration 1	DOWN	not_DE	DOWN	0	-8	0	-2	0	-1	-1	-1	-1	0	-1	0	-1	-1	0	0	0	-1	0	-1
PARD6B	3.183	5.585	par-6 family cell polarity regulator beta	UP	not_DE	NA	NA	NA	NA	NA	NA	NA	NA	NA	NA	NA	NA	NA	NA	NA	NA	NA	NA	NA	NA	NA
PASK	1.494	0.411	PAS domain containing serine/threonine kinase	UP	NA	NA	NA	NA	NA	NA	NA	NA	NA	NA	NA	NA	NA	NA	NA	NA	NA	NA	NA	NA	NA	NA
PAX6	5.28	1.007	paired box 6	UP	NA	NA	NA	NA	NA	NA	NA	NA	NA	NA	NA	NA	NA	NA	NA	NA	NA	NA	NA	NA	NA	NA
PAXBP1	1.18	0.19	PAX3 and PAX7 binding protein 1	UP	NA	NA	NA	NA	NA	NA	NA	NA	NA	NA	NA	NA	NA	NA	NA	NA	NA	NA	NA	NA	NA	NA
PCDHB11	2.937	0.392	protocadherin beta 11	UP	NA	NA	NA	NA	NA	NA	NA	NA	NA	NA	NA	NA	NA	NA	NA	NA	NA	NA	NA	NA	NA	NA
PCDHB2	3.006	3.83	protocadherin beta 2	UP	NA	NA	NA	NA	NA	NA	NA	NA	NA	NA	NA	NA	NA	NA	NA	NA	NA	NA	NA	NA	NA	NA
PCDHGA11	-5.642	5.269	protocadherin gamma subfamily A, 11	DOWN	NA	NA	NA	NA	NA	NA	NA	NA	NA	NA	NA	NA	NA	NA	NA	NA	NA	NA	NA	NA	NA	NA
PCDHGA12	-5.112	7.864	protocadherin gamma subfamily A, 12	DOWN	NA	DOWN	0	-7	NA	NA	NA	NA	-1	-1	0	0	-1	0	-1	0	-1	-1	0	0	0	-1
PCLO	1.581	0.146	piccolo presynaptic cytomatrix protein	UP	NA	NA	NA	NA	NA	NA	NA	NA	NA	NA	NA	NA	NA	NA	NA	NA	NA	NA	NA	NA	NA	NA
PCNA	1.069	0.186	proliferating cell nuclear antigen	UP	not_DE	NA	NA	NA	NA	NA	NA	NA	NA	NA	NA	NA	NA	NA	NA	NA	NA	NA	NA	NA	NA	NA
PDE11A	3.08	0.766	phosphodiesterase 11A	UP	NA	NA	NA	NA	NA	NA	NA	NA	NA	NA	NA	NA	NA	NA	NA	NA	NA	NA	NA	NA	NA	NA
PDE4D	1.469	0.127	phosphodiesterase 4D, cAMP-specific	UP	not_DE	NA	NA	NA	NA	NA	NA	NA	NA	NA	NA	NA	NA	NA	NA	NA	NA	NA	NA	NA	NA	NA
PDGFRB	-3.069	5.877	platelet-derived growth factor receptor, beta polypeptide	DOWN	not_DE	NA	NA	NA	NA	NA	NA	NA	NA	NA	NA	NA	NA	NA	NA	NA	NA	NA	NA	NA	NA	NA
PDLIM4	-2.155	34.067	PDZ and LIM domain 4	DOWN	not_DE	NA	NA	NA	NA	NA	NA	NA	NA	NA	NA	NA	NA	NA	NA	NA	NA	NA	NA	NA	NA	NA
PDX1	2.646	0.896	pancreatic and duodenal homeobox 1	UP	NA	UP	5	0	NA	NA	NA	NA	1	0	1	0	0	0	0	0	1	1	0	1	0	0
PEAR1	-3.989	11.396	platelet endothelial aggregation receptor 1	DOWN	NA	DOWN	0	-7	0	-3	0	-1	0	-1	0	0	-1	0	-1	0	-1	-1	0	-1	0	-1
PGBD5	5.701	0.135	piggyBac transposable element derived 5	UP	NA	NA	NA	NA	NA	NA	NA	NA	NA	NA	NA	NA	NA	NA	NA	NA	NA	NA	NA	NA	NA	NA
PHF14	1.239	0.64	PHD finger protein 14	UP	not_DE	NA	NA	NA	NA	NA	NA	NA	NA	NA	NA	NA	NA	NA	NA	NA	NA	NA	NA	NA	NA	NA
PHYHD1	-2.354	8.612	phytanoyl-CoA dioxygenase domain containing 1	DOWN	NA	DOWN	0	-11	0	-5	NA	NA	-1	-1	-1	-1	0	-1	-1	-1	-1	-1	-1	-1	0	0
PHYHIP	-4.294	29.978	phytanoyl-CoA 2-hydroxylase interacting protein	DOWN	NA	DOWN	1	-10	0	-4	NA	NA	-1	-1	-1	-1	-1	-1	-1	0	0	0	-1	-1	1	-1
PIK3IP1	-1.721	2.468	phosphoinositide-3-kinase interacting protein 1	DOWN	NA	NA	NA	NA	NA	NA	NA	NA	NA	NA	NA	NA	NA	NA	NA	NA	NA	NA	NA	NA	NA	NA
PIK3R3	1.513	0.336	phosphoinositide-3-kinase, regulatory subunit 3 (gamma)	UP	NA	NA	NA	NA	NA	NA	NA	NA	NA	NA	NA	NA	NA	NA	NA	NA	NA	NA	NA	NA	NA	NA
PIP5KL1	4.021	0.35	phosphatidylinositol-4-phosphate 5-kinase-like 1	UP	NA	NA	NA	NA	NA	NA	NA	NA	NA	NA	NA	NA	NA	NA	NA	NA	NA	NA	NA	NA	NA	NA
PKMYT1	1.047	0.373	protein kinase, membrane associated tyrosine/threonine 1	UP	not_DE	UP	14	0	NA	NA	1	0	1	1	1	1	1	1	1	1	1	1	1	1	1	1
PLAT	-1.676	98.771	plasminogen activator, tissue	DOWN	NA	NA	NA	NA	0	-2	NA	NA	NA	NA	NA	NA	NA	NA	NA	NA	NA	NA	NA	NA	NA	NA
PLCB1	1.297	0.182	phospholipase C, beta 1 (phosphoinositide-specific)	UP	NA	NA	NA	NA	NA	NA	NA	NA	NA	NA	NA	NA	NA	NA	NA	NA	NA	NA	NA	NA	NA	NA
PLCB4	3.251	0.108	phospholipase C, beta 4	UP	not_DE	NA	NA	NA	NA	NA	NA	NA	NA	NA	NA	NA	NA	NA	NA	NA	NA	NA	NA	NA	NA	NA
PLCD1	-2.188	9.461	phospholipase C, delta 1	DOWN	not_DE	NA	NA	NA	NA	NA	NA	NA	NA	NA	NA	NA	NA	NA	NA	NA	NA	NA	NA	NA	NA	NA
PLD3	-1.266	89.443	phospholipase D family, member 3	DOWN	DOWN	NA	NA	NA	NA	NA	NA	NA	NA	NA	NA	NA	NA	NA	NA	NA	NA	NA	NA	NA	NA	NA
PLEKHG5	-1.083	2.017	pleckstrin homology domain containing, family G (with RhoGef domain) member 5	DOWN	NA	NA	NA	NA	NA	NA	NA	NA	NA	NA	NA	NA	NA	NA	NA	NA	NA	NA	NA	NA	NA	NA
PM20D2	1.586	2.099	peptidase M20 domain containing 2	UP	not_DE	NA	NA	NA	NA	NA	NA	NA	NA	NA	NA	NA	NA	NA	NA	NA	NA	NA	NA	NA	NA	NA
POLA1	1.701	0.621	polymerase (DNA directed), alpha 1, catalytic subunit	UP	not_DE	NA	NA	NA	NA	NA	NA	NA	NA	NA	NA	NA	NA	NA	NA	NA	NA	NA	NA	NA	NA	NA
POLQ	1.793	0.117	polymerase (DNA directed), theta	UP	not_DE	UP	13	0	4	0	NA	NA	1	1	1	1	1	1	1	1	1	1	1	1	0	1
POMC	-2.72	3.408	proopiomelanocortin	DOWN	NA	NA	NA	NA	NA	NA	NA	NA	NA	NA	NA	NA	NA	NA	NA	NA	NA	NA	NA	NA	NA	NA
POU2F2	-2.994	8.435	POU class 2 homeobox 2	DOWN	NA	NA	NA	NA	NA	NA	NA	NA	NA	NA	NA	NA	NA	NA	NA	NA	NA	NA	NA	NA	NA	NA
POU4F1	5.441	1.205	POU class 4 homeobox 1	UP	NA	NA	NA	NA	NA	NA	NA	NA	NA	NA	NA	NA	NA	NA	NA	NA	NA	NA	NA	NA	NA	NA
PPFIA3	2.838	1.59	protein tyrosine phosphatase, receptor type, f polypeptide (PTPRF), interacting protein (liprin), alpha 3	UP	NA	NA	NA	NA	NA	NA	NA	NA	NA	NA	NA	NA	NA	NA	NA	NA	NA	NA	NA	NA	NA	NA
PPP1R9A	3.291	4.57	protein phosphatase 1, regulatory subunit 9A	UP	not_DE	NA	NA	NA	0	-2	1	0	NA	NA	NA	NA	NA	NA	NA	NA	NA	NA	NA	NA	NA	NA
PPP2R2C	3.866	1.952	protein phosphatase 2, regulatory subunit B, gamma	UP	not_DE	NA	NA	NA	3	0	1	0	NA	NA	NA	NA	NA	NA	NA	NA	NA	NA	NA	NA	NA	NA
PPP4R4	1.378	0.318	protein phosphatase 4, regulatory subunit 4	UP	NA	NA	NA	NA	1	-1	NA	NA	NA	NA	NA	NA	NA	NA	NA	NA	NA	NA	NA	NA	NA	NA
PRAME	8.685	0.253	preferentially expressed antigen in melanoma	UP	NA	UP	12	-1	5	0	NA	NA	1	1	1	1	-1	1	1	1	1	1	1	1	0	1
PRDM13	5.332	0.239	PR domain containing 13	UP	not_DE	NA	NA	NA	NA	NA	NA	NA	NA	NA	NA	NA	NA	NA	NA	NA	NA	NA	NA	NA	NA	NA
PRKAR1B	-1.316	2.949	protein kinase, cAMP-dependent, regulatory, type I, beta	DOWN	not_DE	NA	NA	NA	NA	NA	NA	NA	NA	NA	NA	NA	NA	NA	NA	NA	NA	NA	NA	NA	NA	NA
PRKCDBP	-1.574	86.326	protein kinase C, delta binding protein	DOWN	DOWN	NA	NA	NA	NA	NA	NA	NA	NA	NA	NA	NA	NA	NA	NA	NA	NA	NA	NA	NA	NA	NA
PRKCG	4.158	0.168	protein kinase C, gamma	UP	NA	NA	NA	NA	NA	NA	NA	NA	NA	NA	NA	NA	NA	NA	NA	NA	NA	NA	NA	NA	NA	NA
PRKDC	1.223	0.205	protein kinase, DNA-activated, catalytic polypeptide	UP	UP	NA	NA	NA	NA	NA	NA	NA	NA	NA	NA	NA	NA	NA	NA	NA	NA	NA	NA	NA	NA	NA
PRPH	1.109	0.174	peripherin	UP	not_DE	NA	NA	NA	NA	NA	NA	NA	NA	NA	NA	NA	NA	NA	NA	NA	NA	NA	NA	NA	NA	NA
PRSS16	2.114	1.898	protease, serine, 16 (thymus)	UP	NA	NA	NA	NA	NA	NA	NA	NA	NA	NA	NA	NA	NA	NA	NA	NA	NA	NA	NA	NA	NA	NA
PRTG	2.593	0.039	protogenin	UP	NA	DOWN	0	-8	NA	NA	1	0	0	-1	0	0	-1	-1	-1	0	-1	-1	0	0	-1	-1
PSIP1	1.39	2.057	PC4 and SFRS1 interacting protein 1	UP	not_DE	NA	NA	NA	NA	NA	NA	NA	NA	NA	NA	NA	NA	NA	NA	NA	NA	NA	NA	NA	NA	NA
PTCH1	2.128	0.155	patched 1	UP	NA	NA	NA	NA	NA	NA	NA	NA	NA	NA	NA	NA	NA	NA	NA	NA	NA	NA	NA	NA	NA	NA
PTCH2	3.586	3.338	patched 2	UP	NA	NA	NA	NA	NA	NA	NA	NA	NA	NA	NA	NA	NA	NA	NA	NA	NA	NA	NA	NA	NA	NA
PTGS1	-1.429	48.263	prostaglandin-endoperoxide synthase 1 (prostaglandin G/H synthase and cyclooxygenase)	DOWN	not_DE	DOWN	1	-6	0	-2	NA	NA	-1	0	-1	0	-1	0	0	0	0	-1	-1	-1	0	1
PTH2R	2.639	0.085	parathyroid hormone 2 receptor	UP	NA	NA	NA	NA	NA	NA	NA	NA	NA	NA	NA	NA	NA	NA	NA	NA	NA	NA	NA	NA	NA	NA
PTPDC1	1.887	1.765	protein tyrosine phosphatase domain containing 1	UP	NA	NA	NA	NA	NA	NA	NA	NA	NA	NA	NA	NA	NA	NA	NA	NA	NA	NA	NA	NA	NA	NA
PTPLAD2	-1.885	26.478	protein tyrosine phosphatase-like A domain containing 2	DOWN	NA	NA	NA	NA	NA	NA	NA	NA	NA	NA	NA	NA	NA	NA	NA	NA	NA	NA	NA	NA	NA	NA
PTRF	-1.154	1.779	polymerase I and transcript release factor	DOWN	not_DE	DOWN	0	-9	0	-2	0	-1	-1	-1	-1	0	-1	0	0	0	-1	-1	-1	-1	0	-1
PUM2	1.049	0.651	pumilio RNA-binding family member 2	UP	not_DE	NA	NA	NA	NA	NA	NA	NA	NA	NA	NA	NA	NA	NA	NA	NA	NA	NA	NA	NA	NA	NA
PXDN	-3.751	21.049	peroxidasin homolog (Drosophila)	DOWN	UP	NA	NA	NA	NA	NA	NA	NA	NA	NA	NA	NA	NA	NA	NA	NA	NA	NA	NA	NA	NA	NA
PYCARD	-1.858	4.324	PYD and CARD domain containing	DOWN	UP	NA	NA	NA	NA	NA	1	0	NA	NA	NA	NA	NA	NA	NA	NA	NA	NA	NA	NA	NA	NA
RAB11FIP4	1.834	4.7	RAB11 family interacting protein 4 (class II)	UP	NA	NA	NA	NA	NA	NA	NA	NA	NA	NA	NA	NA	NA	NA	NA	NA	NA	NA	NA	NA	NA	NA
RACGAP1	1.237	1.184	Rac GTPase activating protein 1	UP	not_DE	UP	9	0	2	0	NA	NA	1	1	1	1	1	0	0	1	1	1	0	0	0	1
RAD51B	1.179	0.251	RAD51 paralog B	UP	NA	NA	NA	NA	NA	NA	NA	NA	NA	NA	NA	NA	NA	NA	NA	NA	NA	NA	NA	NA	NA	NA
RAD54L	2.158	18.457	RAD54-like (S. cerevisiae)	UP	NA	UP	11	0	NA	NA	NA	NA	1	1	1	1	0	1	1	1	1	1	0	1	0	1
RADIL	2.375	1.662	Ras association and DIL domains	UP	NA	DOWN	0	-8	0	-2	NA	NA	-1	-1	-1	0	0	0	0	0	-1	-1	0	-1	-1	-1
RANBP17	1.271	0.234	RAN binding protein 17	UP	NA	NA	NA	NA	NA	NA	1	0	NA	NA	NA	NA	NA	NA	NA	NA	NA	NA	NA	NA	NA	NA
RAP1GAP	1.014	1.639	RAP1 GTPase activating protein	UP	not_DE	NA	NA	NA	1	-1	2	0	NA	NA	NA	NA	NA	NA	NA	NA	NA	NA	NA	NA	NA	NA
RASEF	3.38	0.435	RAS and EF-hand domain containing	UP	NA	NA	NA	NA	NA	NA	NA	NA	NA	NA	NA	NA	NA	NA	NA	NA	NA	NA	NA	NA	NA	NA
RASGRF1	2.24	0.115	Ras protein-specific guanine nucleotide-releasing factor 1	UP	NA	NA	NA	NA	0	-2	NA	NA	NA	NA	NA	NA	NA	NA	NA	NA	NA	NA	NA	NA	NA	NA
RASSF1	-1.037	5.051	Ras association (RalGDS/AF-6) domain family member 1	DOWN	NA	NA	NA	NA	NA	NA	NA	NA	NA	NA	NA	NA	NA	NA	NA	NA	NA	NA	NA	NA	NA	NA
RAVER2	1.82	2.517	ribonucleoprotein, PTB-binding 2	UP	not_DE	NA	NA	NA	NA	NA	NA	NA	NA	NA	NA	NA	NA	NA	NA	NA	NA	NA	NA	NA	NA	NA
RBM11	2.338	5.665	RNA binding motif protein 11	UP	NA	NA	NA	NA	NA	NA	NA	NA	NA	NA	NA	NA	NA	NA	NA	NA	NA	NA	NA	NA	NA	NA
RBM20	4.112	0.687	RNA binding motif protein 20	UP	NA	DOWN	0	-7	NA	NA	NA	NA	-1	-1	-1	-1	0	0	0	0	0	0	0	-1	-1	-1
RBMX	1.055	0.492	RNA binding motif protein, X-linked	UP	UP	NA	NA	NA	NA	NA	NA	NA	NA	NA	NA	NA	NA	NA	NA	NA	NA	NA	NA	NA	NA	NA
RBPMS2	2.406	6.714	RNA binding protein with multiple splicing 2	UP	NA	DOWN	1	-8	0	-2	0	-1	-1	-1	-1	0	1	0	-1	0	0	-1	-1	-1	0	-1
RCOR2	3.071	5.905	REST corepressor 2	UP	NA	UP	9	-1	2	0	NA	NA	0	1	1	1	1	0	0	1	1	1	-1	1	0	1
RDM1	1.704	0.769	RAD52 motif 1	UP	NA	UP	9	0	2	0	NA	NA	1	1	1	1	0	0	1	1	1	1	0	0	0	1
REEP1	1.993	2.773	receptor accessory protein 1	UP	NA	DOWN	0	-8	0	-3	NA	NA	-1	0	-1	0	0	0	-1	0	-1	-1	-1	-1	0	-1
RFC4	1.248	0.499	replication factor C (activator 1) 4, 37kDa	UP	not_DE	UP	8	0	NA	NA	NA	NA	1	1	1	1	0	0	0	1	1	1	0	0	0	1
RFTN1	-1.283	2.194	raftlin, lipid raft linker 1	DOWN	not_DE	NA	NA	NA	0	-2	NA	NA	NA	NA	NA	NA	NA	NA	NA	NA	NA	NA	NA	NA	NA	NA
RGCC	-2.062	56.342	regulator of cell cycle	DOWN	NA	NA	NA	NA	0	-2	NA	NA	NA	NA	NA	NA	NA	NA	NA	NA	NA	NA	NA	NA	NA	NA
RGL3	4.047	3.693	ral guanine nucleotide dissociation stimulator-like 3	UP	NA	NA	NA	NA	1	-1	NA	NA	NA	NA	NA	NA	NA	NA	NA	NA	NA	NA	NA	NA	NA	NA
RHOD	-2.442	25.729	ras homolog family member D	DOWN	NA	NA	NA	NA	NA	NA	NA	NA	NA	NA	NA	NA	NA	NA	NA	NA	NA	NA	NA	NA	NA	NA
RHOV	3.844	6.109	ras homolog family member V	UP	NA	NA	NA	NA	2	0	NA	NA	NA	NA	NA	NA	NA	NA	NA	NA	NA	NA	NA	NA	NA	NA
RHPN1	3.633	0.899	rhophilin, Rho GTPase binding protein 1	UP	NA	UP	7	0	2	0	NA	NA	1	1	1	0	0	0	0	1	1	0	0	1	0	1
RIMKLA	4.764	4.405	ribosomal modification protein rimK-like family member A	UP	NA	NA	NA	NA	1	-1	1	0	NA	NA	NA	NA	NA	NA	NA	NA	NA	NA	NA	NA	NA	NA
RNF157	2.861	4.449	ring finger protein 157	UP	NA	NA	NA	NA	NA	NA	2	0	NA	NA	NA	NA	NA	NA	NA	NA	NA	NA	NA	NA	NA	NA
RNFT2	2.105	5.716	ring finger protein, transmembrane 2	UP	NA	UP	10	0	NA	NA	3	0	1	1	1	0	0	0	1	1	1	1	0	1	1	1
RNH1	-1.406	25.154	ribonuclease/angiogenin inhibitor 1	DOWN	not_DE	NA	NA	NA	NA	NA	NA	NA	NA	NA	NA	NA	NA	NA	NA	NA	NA	NA	NA	NA	NA	NA
RP1-27O5.3	5.524	0.524		UP	NA	NA	NA	NA	NA	NA	NA	NA	NA	NA	NA	NA	NA	NA	NA	NA	NA	NA	NA	NA	NA	NA
RP11-126K1.2	4.116	0.362		UP	NA	NA	NA	NA	NA	NA	NA	NA	NA	NA	NA	NA	NA	NA	NA	NA	NA	NA	NA	NA	NA	NA
RP11-849H4.2	1.132	1.061		UP	NA	NA	NA	NA	NA	NA	NA	NA	NA	NA	NA	NA	NA	NA	NA	NA	NA	NA	NA	NA	NA	NA
RPS6KA5	2.221	0.198	ribosomal protein S6 kinase, 90kDa, polypeptide 5	UP	not_DE	DOWN	0	-6	NA	NA	NA	NA	-1	0	-1	0	-1	0	0	0	0	0	0	-1	-1	-1
RTBDN	3.299	0.233	retbindin	UP	NA	NA	NA	NA	NA	NA	NA	NA	NA	NA	NA	NA	NA	NA	NA	NA	NA	NA	NA	NA	NA	NA
RTKN2	2.046	1.598	rhotekin 2	UP	NA	NA	NA	NA	1	-2	NA	NA	NA	NA	NA	NA	NA	NA	NA	NA	NA	NA	NA	NA	NA	NA
RTN4RL2	2.196	11.223	reticulon 4 receptor-like 2	UP	NA	NA	NA	NA	NA	NA	NA	NA	NA	NA	NA	NA	NA	NA	NA	NA	NA	NA	NA	NA	NA	NA
RUSC2	-1.497	3.364	RUN and SH3 domain containing 2	DOWN	not_DE	NA	NA	NA	NA	NA	NA	NA	NA	NA	NA	NA	NA	NA	NA	NA	NA	NA	NA	NA	NA	NA
S1PR1	-3.41	29.975	sphingosine-1-phosphate receptor 1	DOWN	NA	DOWN	0	-9	0	-2	NA	NA	-1	-1	-1	0	-1	0	-1	0	-1	-1	0	-1	0	-1
SAMD12	2.441	10.72	sterile alpha motif domain containing 12	UP	NA	NA	NA	NA	NA	NA	NA	NA	NA	NA	NA	NA	NA	NA	NA	NA	NA	NA	NA	NA	NA	NA
SAPCD2	2.838	1.663	suppressor APC domain containing 2	UP	NA	NA	NA	NA	6	0	NA	NA	NA	NA	NA	NA	NA	NA	NA	NA	NA	NA	NA	NA	NA	NA
SATB2	1.916	0.122	SATB homeobox 2	UP	not_DE	NA	NA	NA	NA	NA	NA	NA	NA	NA	NA	NA	NA	NA	NA	NA	NA	NA	NA	NA	NA	NA
SBK1	2.802	6.84	SH3 domain binding kinase 1	UP	NA	NA	NA	NA	3	0	NA	NA	NA	NA	NA	NA	NA	NA	NA	NA	NA	NA	NA	NA	NA	NA
SBNO2	-1.025	10.453	strawberry notch homolog 2 (Drosophila)	DOWN	NA	NA	NA	NA	NA	NA	NA	NA	NA	NA	NA	NA	NA	NA	NA	NA	NA	NA	NA	NA	NA	NA
SEMA3E	1.547	0.387	sema domain, immunoglobulin domain (Ig), short basic domain, secreted, (semaphorin) 3E	UP	NA	DOWN	0	-10	0	-3	NA	NA	-1	-1	-1	-1	-1	-1	0	-1	-1	-1	0	-1	0	0
2009-09-01	-1.47	36.278	septin 9	DOWN	UP	NA	NA	NA	NA	NA	NA	NA	NA	NA	NA	NA	NA	NA	NA	NA	NA	NA	NA	NA	NA	NA
SERP2	-3.282	5.312	stress-associated endoplasmic reticulum protein family member 2	DOWN	NA	DOWN	0	-7	NA	NA	0	-1	-1	0	0	0	-1	0	0	0	-1	-1	-1	-1	0	-1
SERPINE1	-2.642	2.535	serpin peptidase inhibitor, clade E (nexin, plasminogen activator inhibitor type 1), member 1	DOWN	not_DE	NA	NA	NA	2	0	NA	NA	NA	NA	NA	NA	NA	NA	NA	NA	NA	NA	NA	NA	NA	NA
SERPINF1	-3.255	128.652	serpin peptidase inhibitor, clade F (alpha-2 antiplasmin, pigment epithelium derived factor), member 1	DOWN	not_DE	NA	NA	NA	NA	NA	NA	NA	NA	NA	NA	NA	NA	NA	NA	NA	NA	NA	NA	NA	NA	NA
SERPING1	-3.392	1.513	serpin peptidase inhibitor, clade G (C1 inhibitor), member 1	DOWN	not_DE	DOWN	0	-7	NA	NA	NA	NA	-1	-1	0	0	-1	0	0	-1	-1	-1	0	0	0	-1
SESN3	-1.175	20.136	sestrin 3	DOWN	NA	NA	NA	NA	NA	NA	NA	NA	NA	NA	NA	NA	NA	NA	NA	NA	NA	NA	NA	NA	NA	NA
SFRP1	-1.641	46.984	secreted frizzled-related protein 1	DOWN	not_DE	DOWN	0	-12	0	-6	0	-1	-1	-1	-1	-1	-1	-1	-1	-1	-1	0	0	-1	-1	-1
SGOL1	2.653	1.462	shugoshin-like 1 (S. pombe)	UP	NA	UP	12	0	4	0	NA	NA	1	1	1	1	0	1	1	1	1	1	1	1	0	1
SH3D19	-2.433	12.738	SH3 domain containing 19	DOWN	not_DE	NA	NA	NA	NA	NA	NA	NA	NA	NA	NA	NA	NA	NA	NA	NA	NA	NA	NA	NA	NA	NA
SIM2	3.632	1.015	single-minded family bHLH transcription factor 2	UP	NA	NA	NA	NA	2	-1	2	0	NA	NA	NA	NA	NA	NA	NA	NA	NA	NA	NA	NA	NA	NA
SIRPA	-1.015	4.351	signal-regulatory protein alpha	DOWN	not_DE	NA	NA	NA	NA	NA	NA	NA	NA	NA	NA	NA	NA	NA	NA	NA	NA	NA	NA	NA	NA	NA
SKA3	1.653	2.285	spindle and kinetochore associated complex subunit 3	UP	NA	UP	12	0	NA	NA	2	0	1	1	1	1	0	1	1	1	1	1	1	1	0	1
SKIDA1	1.909	0.649	SKI/DACH domain containing 1	UP	NA	NA	NA	NA	NA	NA	NA	NA	NA	NA	NA	NA	NA	NA	NA	NA	NA	NA	NA	NA	NA	NA
SLC10A4	4.358	1.098	solute carrier family 10, member 4	UP	NA	NA	NA	NA	NA	NA	NA	NA	NA	NA	NA	NA	NA	NA	NA	NA	NA	NA	NA	NA	NA	NA
SLC16A10	3.075	0.253	solute carrier family 16 (aromatic amino acid transporter), member 10	UP	NA	NA	NA	NA	NA	NA	NA	NA	NA	NA	NA	NA	NA	NA	NA	NA	NA	NA	NA	NA	NA	NA
SLC17A7	4.188	15.232	solute carrier family 17 (vesicular glutamate transporter), member 7	UP	NA	DOWN	0	-6	NA	NA	NA	NA	-1	-1	-1	0	-1	0	0	0	0	0	0	-1	-1	0
SLC7A11	1.921	0.059	solute carrier family 7 (anionic amino acid transporter light chain, xc- system), member 11	UP	NA	UP	12	0	3	0	1	0	0	1	1	1	1	1	1	1	1	1	1	1	0	1
SLCO1B3	3.846	0.51	solute carrier organic anion transporter family, member 1B3	UP	NA	UP	7	-1	3	0	NA	NA	1	0	1	1	0	0	0	-1	1	1	1	1	0	0
SLCO4A1	2.337	13.148	solute carrier organic anion transporter family, member 4A1	UP	NA	NA	NA	NA	NA	NA	NA	NA	NA	NA	NA	NA	NA	NA	NA	NA	NA	NA	NA	NA	NA	NA
SLIT3	-1.372	2.561	slit homolog 3 (Drosophila)	DOWN	NA	DOWN	0	-10	0	-6	NA	NA	-1	-1	-1	0	-1	0	-1	0	-1	-1	-1	-1	0	-1
SMC4	1.484	0.511	structural maintenance of chromosomes 4	UP	not_DE	NA	NA	NA	NA	NA	1	0	NA	NA	NA	NA	NA	NA	NA	NA	NA	NA	NA	NA	NA	NA
SMKR1	3.244	2.11	small lysine-rich protein 1	UP	NA	NA	NA	NA	3	0	NA	NA	NA	NA	NA	NA	NA	NA	NA	NA	NA	NA	NA	NA	NA	NA
SMPDL3B	3.144	1.381	sphingomyelin phosphodiesterase, acid-like 3B	UP	not_DE	NA	NA	NA	NA	NA	2	0	NA	NA	NA	NA	NA	NA	NA	NA	NA	NA	NA	NA	NA	NA
SPAG1	1.386	2.335	sperm associated antigen 1	UP	not_DE	NA	NA	NA	NA	NA	NA	NA	NA	NA	NA	NA	NA	NA	NA	NA	NA	NA	NA	NA	NA	NA
SPARC	-2.366	1070.44	secreted protein, acidic, cysteine-rich (osteonectin)	DOWN	UP	NA	NA	NA	NA	NA	NA	NA	NA	NA	NA	NA	NA	NA	NA	NA	NA	NA	NA	NA	NA	NA
SPATA17	2.279	2.914	spermatogenesis associated 17	UP	NA	NA	NA	NA	NA	NA	NA	NA	NA	NA	NA	NA	NA	NA	NA	NA	NA	NA	NA	NA	NA	NA
SPATA18	-2.543	6.241	spermatogenesis associated 18	DOWN	NA	NA	NA	NA	1	-1	0	-1	NA	NA	NA	NA	NA	NA	NA	NA	NA	NA	NA	NA	NA	NA
SPESP1	-1.817	4.312	sperm equatorial segment protein 1	DOWN	NA	NA	NA	NA	NA	NA	NA	NA	NA	NA	NA	NA	NA	NA	NA	NA	NA	NA	NA	NA	NA	NA
SPIRE2	1.313	0.107	spire-type actin nucleation factor 2	UP	NA	NA	NA	NA	NA	NA	NA	NA	NA	NA	NA	NA	NA	NA	NA	NA	NA	NA	NA	NA	NA	NA
SPON2	-5.317	66.338	spondin 2, extracellular matrix protein	DOWN	not_DE	NA	NA	NA	NA	NA	NA	NA	NA	NA	NA	NA	NA	NA	NA	NA	NA	NA	NA	NA	NA	NA
SPTB	2.082	0.946	spectrin, beta, erythrocytic	UP	not_DE	NA	NA	NA	NA	NA	NA	NA	NA	NA	NA	NA	NA	NA	NA	NA	NA	NA	NA	NA	NA	NA
SRCIN1	3.214	1.398	SRC kinase signaling inhibitor 1	UP	not_DE	UP	6	0	NA	NA	NA	NA	1	0	1	0	0	0	1	0	1	0	0	1	1	0
SRPX	-2.241	101	sushi-repeat containing protein, X-linked	DOWN	not_DE	DOWN	0	-11	NA	NA	0	-1	-1	-1	-1	0	0	0	-1	-1	-1	-1	-1	-1	-1	-1
STAC	2.653	0.63	SH3 and cysteine rich domain	UP	NA	DOWN	1	-10	0	-5	NA	NA	-1	-1	-1	0	0	-1	-1	0	-1	-1	-1	-1	1	-1
STAG2	1.228	1.171	stromal antigen 2	UP	not_DE	NA	NA	NA	NA	NA	NA	NA	NA	NA	NA	NA	NA	NA	NA	NA	NA	NA	NA	NA	NA	NA
STOX1	3.729	0.557	storkhead box 1	UP	NA	NA	NA	NA	NA	NA	NA	NA	NA	NA	NA	NA	NA	NA	NA	NA	NA	NA	NA	NA	NA	NA
STRBP	1.954	0.376	spermatid perinuclear RNA binding protein	UP	not_DE	NA	NA	NA	NA	NA	NA	NA	NA	NA	NA	NA	NA	NA	NA	NA	NA	NA	NA	NA	NA	NA
SULT1E1	-4.039	12.206	sulfotransferase family 1E, estrogen-preferring, member 1	DOWN	not_DE	NA	NA	NA	NA	NA	NA	NA	NA	NA	NA	NA	NA	NA	NA	NA	NA	NA	NA	NA	NA	NA
SYBU	1.293	0.087	syntabulin (syntaxin-interacting)	UP	NA	NA	NA	NA	0	-2	0	-1	NA	NA	NA	NA	NA	NA	NA	NA	NA	NA	NA	NA	NA	NA
SYCP2	3.58	0.111	synaptonemal complex protein 2	UP	NA	NA	NA	NA	NA	NA	NA	NA	NA	NA	NA	NA	NA	NA	NA	NA	NA	NA	NA	NA	NA	NA
SYNC	-1.721	8.698	syncoilin, intermediate filament protein	DOWN	not_DE	NA	NA	NA	NA	NA	NA	NA	NA	NA	NA	NA	NA	NA	NA	NA	NA	NA	NA	NA	NA	NA
SYT1	1.068	0.305	synaptotagmin I	UP	NA	NA	NA	NA	1	-1	NA	NA	NA	NA	NA	NA	NA	NA	NA	NA	NA	NA	NA	NA	NA	NA
TARBP1	1.146	0.224	TAR (HIV-1) RNA binding protein 1	UP	not_DE	NA	NA	NA	NA	NA	NA	NA	NA	NA	NA	NA	NA	NA	NA	NA	NA	NA	NA	NA	NA	NA
TBC1D30	3.978	0.139	TBC1 domain family, member 30	UP	NA	NA	NA	NA	NA	NA	1	0	NA	NA	NA	NA	NA	NA	NA	NA	NA	NA	NA	NA	NA	NA
TCEAL7	-7.82	41.786	transcription elongation factor A (SII)-like 7	DOWN	NA	DOWN	0	-11	NA	NA	NA	NA	-1	-1	-1	0	-1	0	-1	0	-1	-1	-1	-1	-1	-1
TCN2	-1.85	11.09	transcobalamin II	DOWN	NA	NA	NA	NA	NA	NA	NA	NA	NA	NA	NA	NA	NA	NA	NA	NA	NA	NA	NA	NA	NA	NA
TERT	7	0.628	telomerase reverse transcriptase	UP	not_DE	UP	7	0	NA	NA	1	0	1	0	0	1	0	0	0	1	1	1	0	1	0	1
TET1	2.02	0.819	tet methylcytosine dioxygenase 1	UP	NA	NA	NA	NA	NA	NA	NA	NA	NA	NA	NA	NA	NA	NA	NA	NA	NA	NA	NA	NA	NA	NA
TEX14	3.751	0.152	testis expressed 14	UP	NA	NA	NA	NA	NA	NA	NA	NA	NA	NA	NA	NA	NA	NA	NA	NA	NA	NA	NA	NA	NA	NA
TEX19	5.502	1.208	testis expressed 19	UP	NA	NA	NA	NA	NA	NA	NA	NA	NA	NA	NA	NA	NA	NA	NA	NA	NA	NA	NA	NA	NA	NA
TFAP2A	2.468	4.563	transcription factor AP-2 alpha (activating enhancer binding protein 2 alpha)	UP	NA	NA	NA	NA	3	-1	NA	NA	NA	NA	NA	NA	NA	NA	NA	NA	NA	NA	NA	NA	NA	NA
TGFB1I1	-1.821	1.66	transforming growth factor beta 1 induced transcript 1	DOWN	UP	NA	NA	NA	0	-2	NA	NA	NA	NA	NA	NA	NA	NA	NA	NA	NA	NA	NA	NA	NA	NA
TGM2	-1.928	0.48	transglutaminase 2	DOWN	not_DE	NA	NA	NA	0	-2	NA	NA	NA	NA	NA	NA	NA	NA	NA	NA	NA	NA	NA	NA	NA	NA
THBD	-1.421	20.46	thrombomodulin	DOWN	NA	DOWN	0	-7	NA	NA	NA	NA	0	-1	0	0	-1	0	-1	-1	-1	-1	0	0	0	-1
THBS2	-1.899	158.686	thrombospondin 2	DOWN	UP	NA	NA	NA	4	0	NA	NA	NA	NA	NA	NA	NA	NA	NA	NA	NA	NA	NA	NA	NA	NA
TIMP1	-1.919	1.882	TIMP metallopeptidase inhibitor 1	DOWN	UP	NA	NA	NA	NA	NA	NA	NA	NA	NA	NA	NA	NA	NA	NA	NA	NA	NA	NA	NA	NA	NA
TIMP3	-2.297	347.297	TIMP metallopeptidase inhibitor 3	DOWN	not_DE	DOWN	0	-8	0	-2	NA	NA	-1	-1	0	0	-1	0	-1	0	-1	-1	-1	0	0	-1
TLX2	4.573	0.969	T-cell leukemia homeobox 2	UP	NA	NA	NA	NA	NA	NA	NA	NA	NA	NA	NA	NA	NA	NA	NA	NA	NA	NA	NA	NA	NA	NA
TM4SF19	3.907	0.023	transmembrane 4 L six family member 19	UP	NA	UP	9	0	NA	NA	NA	NA	1	0	1	1	0	1	1	1	0	1	0	1	0	1
TMEM145	3.306	0.274	transmembrane protein 145	UP	NA	UP	9	0	NA	NA	NA	NA	1	1	0	0	1	1	1	1	1	1	0	1	0	0
TMEM220	-1.025	4.691	transmembrane protein 220	DOWN	NA	DOWN	0	-11	0	-4	NA	NA	-1	-1	-1	-1	-1	0	0	-1	-1	-1	0	-1	-1	-1
TMEM25	-1.076	11.403	transmembrane protein 25	DOWN	NA	NA	NA	NA	NA	NA	NA	NA	NA	NA	NA	NA	NA	NA	NA	NA	NA	NA	NA	NA	NA	NA
TMEM98	-1.554	30.494	transmembrane protein 98	DOWN	not_DE	NA	NA	NA	NA	NA	NA	NA	NA	NA	NA	NA	NA	NA	NA	NA	NA	NA	NA	NA	NA	NA
TMPO	1.216	1.773	thymopoietin	UP	UP	NA	NA	NA	NA	NA	NA	NA	NA	NA	NA	NA	NA	NA	NA	NA	NA	NA	NA	NA	NA	NA
TMPRSS3	3.599	0.675	transmembrane protease, serine 3	UP	NA	NA	NA	NA	1	-1	NA	NA	NA	NA	NA	NA	NA	NA	NA	NA	NA	NA	NA	NA	NA	NA
TMPRSS9	2.828	0.154	transmembrane protease, serine 9	UP	NA	NA	NA	NA	NA	NA	NA	NA	NA	NA	NA	NA	NA	NA	NA	NA	NA	NA	NA	NA	NA	NA
TNFAIP2	2.359	0.064	tumor necrosis factor, alpha-induced protein 2	UP	not_DE	NA	NA	NA	NA	NA	NA	NA	NA	NA	NA	NA	NA	NA	NA	NA	NA	NA	NA	NA	NA	NA
TNFAIP8L3	-3.456	2.763	tumor necrosis factor, alpha-induced protein 8-like 3	DOWN	NA	DOWN	1	-8	0	-2	NA	NA	-1	0	-1	-1	1	0	0	0	-1	-1	0	-1	-1	-1
TNFRSF10C	-3.491	8.297	tumor necrosis factor receptor superfamily, member 10c, decoy without an intracellular domain	DOWN	NA	NA	NA	NA	NA	NA	NA	NA	NA	NA	NA	NA	NA	NA	NA	NA	NA	NA	NA	NA	NA	NA
TNFRSF10D	-2.96	51.635	tumor necrosis factor receptor superfamily, member 10d, decoy with truncated death domain	DOWN	NA	NA	NA	NA	NA	NA	NA	NA	NA	NA	NA	NA	NA	NA	NA	NA	NA	NA	NA	NA	NA	NA
TNFRSF6B	-3.791	31.135	tumor necrosis factor receptor superfamily, member 6b, decoy	DOWN	not_DE	UP	6	-1	NA	NA	NA	NA	0	0	1	1	-1	1	1	0	1	0	0	1	0	0
TNFSF12	-1.283	17.747	tumor necrosis factor (ligand) superfamily, member 12	DOWN	NA	NA	NA	NA	NA	NA	NA	NA	NA	NA	NA	NA	NA	NA	NA	NA	NA	NA	NA	NA	NA	NA
TNFSF9	1.726	0.173	tumor necrosis factor (ligand) superfamily, member 9	UP	NA	NA	NA	NA	2	0	NA	NA	NA	NA	NA	NA	NA	NA	NA	NA	NA	NA	NA	NA	NA	NA
TNNT1	4.703	0.945	troponin T type 1 (skeletal, slow)	UP	NA	UP	10	0	3	0	NA	NA	1	1	1	0	0	1	1	1	1	1	0	1	0	1
TNRC18	1.098	0.385	trinucleotide repeat containing 18	UP	not_DE	NA	NA	NA	NA	NA	NA	NA	NA	NA	NA	NA	NA	NA	NA	NA	NA	NA	NA	NA	NA	NA
TOP2A	2.373	5.229	topoisomerase (DNA) II alpha 170kDa	UP	UP	UP	14	0	6	0	2	0	1	1	1	1	1	1	1	1	1	1	1	1	1	1
TOR4A	-1.505	16.048	torsin family 4, member A	DOWN	not_DE	NA	NA	NA	NA	NA	NA	NA	NA	NA	NA	NA	NA	NA	NA	NA	NA	NA	NA	NA	NA	NA
TP73	4.154	0.197	tumor protein p73	UP	NA	UP	8	0	NA	NA	NA	NA	1	0	1	0	0	1	1	1	0	1	0	1	0	1
TPD52	2.321	0.215	tumor protein D52	UP	not_DE	NA	NA	NA	NA	NA	NA	NA	NA	NA	NA	NA	NA	NA	NA	NA	NA	NA	NA	NA	NA	NA
TPM2	-3.653	581.943	tropomyosin 2 (beta)	DOWN	not_DE	DOWN	1	-9	0	-3	0	-1	-1	-1	-1	-1	-1	0	-1	1	0	0	-1	-1	0	-1
TREM1	-2.94	29.075	triggering receptor expressed on myeloid cells 1	DOWN	NA	NA	NA	NA	2	-1	NA	NA	NA	NA	NA	NA	NA	NA	NA	NA	NA	NA	NA	NA	NA	NA
TRIM22	-2.37	0.736	tripartite motif containing 22	DOWN	not_DE	NA	NA	NA	NA	NA	NA	NA	NA	NA	NA	NA	NA	NA	NA	NA	NA	NA	NA	NA	NA	NA
TSPYL5	-2.486	15.462	TSPY-like 5	DOWN	NA	DOWN	0	-7	NA	NA	0	-1	-1	0	-1	-1	0	-1	0	-1	0	0	0	-1	0	-1
TTC6	3.6	0.488	tetratricopeptide repeat domain 6	UP	NA	NA	NA	NA	NA	NA	NA	NA	NA	NA	NA	NA	NA	NA	NA	NA	NA	NA	NA	NA	NA	NA
TWIST2	-2.098	15.65	twist family bHLH transcription factor 2	DOWN	NA	DOWN	0	-9	0	-3	NA	NA	-1	-1	-1	0	-1	0	0	0	-1	0	-1	-1	-1	-1
UHRF1BP1	1.45	0.253	UHRF1 binding protein 1	UP	not_DE	NA	NA	NA	NA	NA	NA	NA	NA	NA	NA	NA	NA	NA	NA	NA	NA	NA	NA	NA	NA	NA
UPF3B	1.781	0.334	UPF3 regulator of nonsense transcripts homolog B (yeast)	UP	not_DE	NA	NA	NA	NA	NA	NA	NA	NA	NA	NA	NA	NA	NA	NA	NA	NA	NA	NA	NA	NA	NA
USP1	1.515	0.094	ubiquitin specific peptidase 1	UP	NA	NA	NA	NA	NA	NA	NA	NA	NA	NA	NA	NA	NA	NA	NA	NA	NA	NA	NA	NA	NA	NA
VAMP5	-4.694	29.585	vesicle-associated membrane protein 5	DOWN	NA	NA	NA	NA	NA	NA	0	-1	NA	NA	NA	NA	NA	NA	NA	NA	NA	NA	NA	NA	NA	NA
VAX1	5.704	0.207	ventral anterior homeobox 1	UP	NA	NA	NA	NA	NA	NA	NA	NA	NA	NA	NA	NA	NA	NA	NA	NA	NA	NA	NA	NA	NA	NA
VCAM1	-3.812	28.846	vascular cell adhesion molecule 1	DOWN	not_DE	NA	NA	NA	NA	NA	NA	NA	NA	NA	NA	NA	NA	NA	NA	NA	NA	NA	NA	NA	NA	NA
VGF	1.498	1.799	VGF nerve growth factor inducible	UP	not_DE	NA	NA	NA	NA	NA	NA	NA	NA	NA	NA	NA	NA	NA	NA	NA	NA	NA	NA	NA	NA	NA
VIM	-2.349	8.768	vimentin	DOWN	not_DE	NA	NA	NA	NA	NA	NA	NA	NA	NA	NA	NA	NA	NA	NA	NA	NA	NA	NA	NA	NA	NA
VWDE	2.683	1.55	von Willebrand factor D and EGF domains	UP	NA	NA	NA	NA	NA	NA	NA	NA	NA	NA	NA	NA	NA	NA	NA	NA	NA	NA	NA	NA	NA	NA
WNT6	3.228	0.768	wingless-type MMTV integration site family, member 6	UP	NA	NA	NA	NA	NA	NA	0	-1	NA	NA	NA	NA	NA	NA	NA	NA	NA	NA	NA	NA	NA	NA
XRCC2	1.865	1.566	X-ray repair complementing defective repair in Chinese hamster cells 2	UP	NA	UP	11	0	4	0	NA	NA	1	1	1	1	0	1	1	1	1	1	0	1	0	1
YBX2	3.762	0.274	Y box binding protein 2	UP	not_DE	NA	NA	NA	NA	NA	NA	NA	NA	NA	NA	NA	NA	NA	NA	NA	NA	NA	NA	NA	NA	NA
YJEFN3	1.264	0.489	YjeF N-terminal domain containing 3	UP	NA	NA	NA	NA	NA	NA	NA	NA	NA	NA	NA	NA	NA	NA	NA	NA	NA	NA	NA	NA	NA	NA
ZIC2	6.199	1.822	Zic family member 2	UP	NA	UP	9	0	5	0	NA	NA	1	0	1	1	0	0	0	1	1	1	1	1	0	1
ZIC5	7.007	0.159	Zic family member 5	UP	NA	UP	9	0	2	0	NA	NA	1	0	1	1	0	0	0	1	1	1	1	1	0	1
ZNF132	-3.12	2.107	zinc finger protein 132	DOWN	NA	NA	NA	NA	NA	NA	NA	NA	NA	NA	NA	NA	NA	NA	NA	NA	NA	NA	NA	NA	NA	NA
ZNF154	-5.555	6.812	zinc finger protein 154	DOWN	NA	NA	NA	NA	NA	NA	0	-1	NA	NA	NA	NA	NA	NA	NA	NA	NA	NA	NA	NA	NA	NA
ZNF331	1.313	1.671	zinc finger protein 331	UP	NA	NA	NA	NA	NA	NA	NA	NA	NA	NA	NA	NA	NA	NA	NA	NA	NA	NA	NA	NA	NA	NA
ZNF34	1.894	0.076	zinc finger protein 34	UP	not_DE	NA	NA	NA	NA	NA	NA	NA	NA	NA	NA	NA	NA	NA	NA	NA	NA	NA	NA	NA	NA	NA
ZNF418	-1.414	4	zinc finger protein 418	DOWN	NA	NA	NA	NA	NA	NA	NA	NA	NA	NA	NA	NA	NA	NA	NA	NA	NA	NA	NA	NA	NA	NA
ZNF519	1.902	0.553	zinc finger protein 519	UP	NA	NA	NA	NA	NA	NA	NA	NA	NA	NA	NA	NA	NA	NA	NA	NA	NA	NA	NA	NA	NA	NA
ZNF620	2.15	2.104	zinc finger protein 620	UP	NA	NA	NA	NA	NA	NA	NA	NA	NA	NA	NA	NA	NA	NA	NA	NA	NA	NA	NA	NA	NA	NA
ZNF671	-2.943	5.338	zinc finger protein 671	DOWN	NA	NA	NA	NA	NA	NA	NA	NA	NA	NA	NA	NA	NA	NA	NA	NA	NA	NA	NA	NA	NA	NA
ZNF677	-1.937	4.13	zinc finger protein 677	DOWN	NA	DOWN	0	-10	NA	NA	NA	NA	-1	-1	-1	-1	0	-1	-1	0	-1	-1	0	-1	0	-1
ZNF704	3.164	0.05	zinc finger protein 704	UP	NA	NA	NA	NA	NA	NA	NA	NA	NA	NA	NA	NA	NA	NA	NA	NA	NA	NA	NA	NA	NA	NA
ZNF714	1.512	2.252	zinc finger protein 714	UP	NA	NA	NA	NA	NA	NA	NA	NA	NA	NA	NA	NA	NA	NA	NA	NA	NA	NA	NA	NA	NA	NA
ZNF98	3.695	0.703	zinc finger protein 98	UP	NA	NA	NA	NA	NA	NA	NA	NA	NA	NA	NA	NA	NA	NA	NA	NA	NA	NA	NA	NA	NA	NA
ZRANB3	1.035	0.254	zinc finger, RAN-binding domain containing 3	UP	NA	NA	NA	NA	NA	NA	NA	NA	NA	NA	NA	NA	NA	NA	NA	NA	NA	NA	NA	NA	NA	NA
ZSCAN18	-1.78	21.02	zinc finger and SCAN domain containing 18	DOWN	NA	NA	NA	NA	NA	NA	NA	NA	NA	NA	NA	NA	NA	NA	NA	NA	NA	NA	NA	NA	NA	NA
ZSWIM5	3.065	1.363	zinc finger, SWIM-type containing 5	UP	NA	NA	NA	NA	NA	NA	NA	NA	NA	NA	NA	NA	NA	NA	NA	NA	NA	NA	NA	NA	NA	NA
ZYG11A	3.488	0.117	zyg-11 family member A, cell cycle regulator	UP	NA	NA	NA	NA	NA	NA	NA	NA	NA	NA	NA	NA	NA	NA	NA	NA	NA	NA	NA	NA	NA	NA
ZYX	-1.032	0.529	zyxin	DOWN	not_DE	NA	NA	NA	NA	NA	NA	NA	NA	NA	NA	NA	NA	NA	NA	NA	NA	NA	NA	NA	NA	NA

## Sheet: CORE
CORE - this provides a list of 128 protein coding genes that are differentially expressed in FANTOM5 cancer cell lines (DE pipeline + gene wise absFC > 2) and that are differentially expressed in TCGA primary tumors (DE thresholds: abs FC > 2, FDR < 0.01), and show the same directionality of expression change.
													Differential expression in specific tumor types from TCGA RNA-seq data
gene_symbol	FANTOM5 log2FC	FANTOM5 mean_tpm	description	FANTOM5 Pan- Cancer DE	Zhang_COAD_proteome_DE	TCGA Pan-Cancer DE	TCGA UP	TCGA DOWN	Cabanski UP	Cabanski DOWN	Oncomine UP	Oncomine DOWN	BLCA	BRCA	COAD	HNSC	KICH	KIRC	KIRP	LIHC	LUAD	LUSC	PRAD	READ	THCA	UCEC
ACOX2	-1.529	2.721	acyl-CoA oxidase 2, branched chain	DOWN	not_DE	DOWN	0	-9	0	-4	0	-2	-1	0	0	-1	-1	-1	-1	-1	0	-1	-1	0	0	-1
ANPEP	-2.6	92.447	alanyl (membrane) aminopeptidase	DOWN	DOWN	DOWN	1	-7	1	-1	NA	NA	0	-1	-1	0	-1	0	-1	0	-1	-1	0	-1	0	1
AOX1	-4.754	0.66	aldehyde oxidase 1	DOWN	not_DE	DOWN	0	-14	0	-6	0	-3	-1	-1	-1	-1	-1	-1	-1	-1	-1	-1	-1	-1	-1	-1
APOD	-1.611	28.667	apolipoprotein D	DOWN	DOWN	DOWN	0	-11	0	-4	0	-1	-1	-1	-1	-1	-1	-1	-1	0	0	-1	0	-1	-1	-1
ARMCX1	-1.089	15.967	armadillo repeat containing, X-linked 1	DOWN	NA	DOWN	0	-7	NA	NA	0	-2	-1	0	-1	0	0	0	0	0	-1	-1	-1	-1	0	-1
ASNS	1.266	1.157	asparagine synthetase (glutamine-hydrolyzing)	UP	UP	UP	8	0	NA	NA	NA	NA	0	0	1	0	1	0	1	1	1	1	0	1	0	1
ATAD2	2.154	0.917	ATPase family, AAA domain containing 2	UP	not_DE	UP	9	0	NA	NA	NA	NA	1	1	1	1	0	0	0	1	1	1	0	1	0	1
ATAD5	2.199	8.667	ATPase family, AAA domain containing 5	UP	NA	UP	10	0	2	0	NA	NA	1	0	1	1	0	1	1	1	1	1	0	1	0	1
BEX4	-1.654	100.905	brain expressed, X-linked 4	DOWN	NA	DOWN	0	-6	NA	NA	NA	NA	0	0	-1	-1	0	-1	0	0	-1	0	0	-1	0	-1
BLM	1.753	0.5	Bloom syndrome, RecQ helicase-like	UP	not_DE	UP	12	0	2	0	NA	NA	1	1	1	1	0	1	1	1	1	1	1	1	0	1
BST1	-1.484	8.941	bone marrow stromal cell antigen 1	DOWN	not_DE	DOWN	0	-8	NA	NA	NA	NA	-1	-1	-1	0	-1	0	0	0	-1	-1	0	-1	0	-1
BUB1B	2.279	19.047	BUB1 mitotic checkpoint serine/threonine kinase B	UP	NA	UP	14	0	5	0	1	0	1	1	1	1	1	1	1	1	1	1	1	1	1	1
CASC5	1.779	0.541	cancer susceptibility candidate 5	UP	NA	UP	8	-1	5	0	NA	NA	1	1	1	1	0	0	-1	0	1	1	1	0	0	1
CBX2	2.587	5.617	chromobox homolog 2	UP	NA	UP	11	0	4	0	NA	NA	1	1	1	1	0	0	0	1	1	1	1	1	1	1
CCDC150	2.826	3.517	coiled-coil domain containing 150	UP	NA	UP	9	-1	NA	NA	1	0	1	1	1	1	-1	1	0	0	1	1	0	1	0	1
CCNE2	1.446	0.096	cyclin E2	UP	NA	UP	9	0	NA	NA	2	0	1	1	0	1	0	1	1	1	1	1	0	0	0	1
CCNO	2.65	2.623	cyclin O	UP	NA	UP	9	-1	2	-1	NA	NA	1	1	1	0	0	-1	1	1	1	1	0	1	0	1
CD70	4.533	0.464	CD70 molecule	UP	not_DE	UP	4	0	2	0	NA	NA	0	0	0	1	0	1	1	0	0	0	0	0	1	0
CDC6	1.83	0.2	cell division cycle 6	UP	NA	UP	12	0	6	0	NA	NA	1	1	1	1	0	1	1	1	1	1	0	1	1	1
CDC7	1.544	0.198	cell division cycle 7	UP	NA	UP	8	0	NA	NA	NA	NA	1	1	1	0	0	0	1	1	1	1	0	0	0	1
CENPF	2.644	3.146	centromere protein F, 350/400kDa	UP	NA	UP	13	0	6	0	1	0	1	1	1	1	1	1	1	1	1	1	1	1	0	1
CHRNA5	2.26	3.789	cholinergic receptor, nicotinic, alpha 5 (neuronal)	UP	NA	UP	7	0	2	0	NA	NA	1	0	0	0	0	0	1	1	1	1	1	0	0	1
CLIP3	-2.608	51.21	CAP-GLY domain containing linker protein 3	DOWN	NA	DOWN	1	-8	0	-3	NA	NA	-1	-1	-1	0	-1	0	-1	0	0	0	-1	-1	1	-1
CLSPN	1.76	0.891	claspin	UP	NA	UP	13	0	5	0	NA	NA	1	1	1	1	0	1	1	1	1	1	1	1	1	1
COX7A1	-7.932	25.098	cytochrome c oxidase subunit VIIa polypeptide 1 (muscle)	DOWN	NA	DOWN	0	-10	0	-5	NA	NA	-1	-1	-1	-1	0	0	-1	0	-1	-1	-1	-1	0	-1
CXCL2	-1.035	63.176	chemokine (C-X-C motif) ligand 2	DOWN	NA	DOWN	2	-8	0	-4	0	-2	-1	-1	1	-1	-1	0	0	-1	-1	-1	0	1	0	-1
DBF4	1.63	1.261	DBF4 homolog (S. cerevisiae)	UP	NA	UP	8	0	NA	NA	NA	NA	1	1	1	0	1	0	0	0	1	1	0	1	0	1
DCN	-3.973	101.922	decorin	DOWN	DOWN	DOWN	0	-13	0	-4	0	-1	-1	-1	-1	0	-1	-1	-1	-1	-1	-1	-1	-1	-1	-1
DLX1	5.185	1.844	distal-less homeobox 1	UP	NA	UP	5	-1	2	0	2	0	0	0	-1	1	0	1	0	0	0	1	1	0	0	1
DLX4	5.282	0.59	distal-less homeobox 4	UP	NA	UP	9	0	NA	NA	NA	NA	1	1	1	1	0	1	1	0	0	1	0	1	0	1
DLX6	5.604	1.202	distal-less homeobox 6	UP	NA	UP	8	0	3	0	NA	NA	1	0	1	1	0	1	0	0	1	1	0	1	0	1
DNAH14	1.635	0.712	dynein, axonemal, heavy chain 14	UP	NA	UP	8	0	NA	NA	NA	NA	1	1	1	0	0	0	0	1	1	1	0	1	0	1
DNALI1	-3.202	7.396	dynein, axonemal, light intermediate chain 1	DOWN	NA	DOWN	0	-8	NA	NA	NA	NA	-1	0	-1	-1	-1	0	0	-1	0	-1	0	-1	-1	0
E2F7	2.516	0.333	E2F transcription factor 7	UP	NA	UP	12	0	5	0	NA	NA	1	1	1	1	0	1	1	1	1	1	0	1	1	1
E2F8	2.971	1.025	E2F transcription factor 8	UP	NA	UP	9	0	3	0	NA	NA	1	1	0	0	1	1	1	1	1	1	0	0	0	1
EXO1	2.726	0.862	exonuclease 1	UP	NA	UP	12	0	5	0	NA	NA	1	1	1	1	0	1	1	1	1	1	1	1	0	1
FABP4	-3.732	286.631	fatty acid binding protein 4, adipocyte	DOWN	DOWN	DOWN	1	-11	0	-4	NA	NA	-1	-1	-1	-1	0	0	-1	1	-1	-1	-1	-1	-1	-1
FABP6	3.454	2.783	fatty acid binding protein 6, ileal	UP	not_DE	UP	8	0	2	0	NA	NA	1	1	1	0	1	1	1	0	0	0	0	1	0	1
FAM111B	2.696	6.533	family with sequence similarity 111, member B	UP	NA	UP	13	0	6	0	NA	NA	1	1	1	1	1	1	1	1	1	1	1	0	1	1
FBLN5	-2.959	19.833	fibulin 5	DOWN	not_DE	DOWN	0	-12	0	-4	NA	NA	-1	-1	-1	0	-1	-1	-1	-1	-1	-1	0	-1	-1	-1
FEZ1	-4.169	48.675	fasciculation and elongation protein zeta 1 (zygin I)	DOWN	NA	DOWN	1	-10	1	-2	NA	NA	-1	-1	-1	1	-1	0	-1	-1	-1	0	-1	-1	0	-1
FLRT2	-1.856	17.278	fibronectin leucine rich transmembrane protein 2	DOWN	NA	DOWN	1	-10	NA	NA	NA	NA	-1	-1	-1	1	-1	-1	-1	-1	0	0	0	-1	-1	-1
GABRD	4.807	5.237	gamma-aminobutyric acid (GABA) A receptor, delta	UP	NA	UP	10	0	2	0	NA	NA	1	1	1	1	1	1	0	1	1	0	0	1	1	0
GPR19	1.877	0.756	G protein-coupled receptor 19	UP	NA	UP	11	0	NA	NA	NA	NA	1	1	1	1	0	1	1	1	1	1	0	1	0	1
GPX3	-1.288	180.29	glutathione peroxidase 3 (plasma)	DOWN	DOWN	DOWN	0	-10	0	-6	0	-1	-1	-1	-1	-1	-1	0	-1	0	-1	-1	-1	-1	0	0
GRIN2D	1.617	1.979	glutamate receptor, ionotropic, N-methyl D-aspartate 2D	UP	NA	UP	10	0	4	0	NA	NA	1	1	1	1	0	1	1	0	1	1	0	1	0	1
GYPC	-2.788	109.024	glycophorin C (Gerbich blood group)	DOWN	not_DE	DOWN	1	-9	0	-4	NA	NA	-1	-1	-1	-1	-1	1	0	0	-1	-1	0	-1	0	-1
HELLS	2.105	0.729	helicase, lymphoid-specific	UP	not_DE	UP	9	-1	3	0	NA	NA	1	1	1	1	-1	0	0	1	1	1	0	1	0	1
HOXB13	6.341	0.323	homeobox B13	UP	NA	UP	8	-1	2	0	NA	NA	0	1	0	1	0	0	1	1	1	1	1	-1	0	1
HOXC13	6.07	0.408	homeobox C13	UP	NA	UP	8	0	3	0	NA	NA	1	1	0	1	0	1	1	0	1	1	0	0	0	1
HSPB6	-6.36	319.99	heat shock protein, alpha-crystallin-related, B6	DOWN	DOWN	DOWN	0	-13	0	-8	0	-1	-1	-1	-1	-1	-1	-1	-1	0	-1	-1	-1	-1	-1	-1
IGF2	-2.652	165.25	insulin-like growth factor 2 (somatomedin A)	DOWN	not_DE	DOWN	0	-8	NA	NA	NA	NA	0	-1	0	0	-1	-1	-1	-1	0	0	-1	0	-1	-1
IGF2BP3	2.263	0.493	insulin-like growth factor 2 mRNA binding protein 3	UP	not_DE	UP	11	0	4	0	NA	NA	1	0	1	1	1	1	1	1	1	1	0	1	0	1
JAM3	-1.327	48.42	junctional adhesion molecule 3	DOWN	NA	DOWN	0	-8	0	-2	NA	NA	-1	-1	-1	0	0	0	-1	0	-1	-1	0	-1	0	-1
KCTD12	-1.501	40.633	potassium channel tetramerization domain containing 12	DOWN	not_DE	DOWN	0	-7	NA	NA	NA	NA	-1	-1	-1	0	0	0	0	0	-1	-1	0	-1	0	-1
KIF14	2.831	1.875	kinesin family member 14	UP	not_DE	UP	13	0	7	0	1	0	1	1	1	1	1	1	1	1	1	1	1	1	0	1
KIF18A	2.958	0.81	kinesin family member 18A	UP	NA	UP	11	0	3	0	NA	NA	1	1	1	1	0	1	1	1	1	1	0	1	0	1
KIF23	1.766	2.285	kinesin family member 23	UP	not_DE	UP	9	0	5	0	1	0	1	1	1	1	0	0	0	1	1	1	0	1	0	1
KIFC2	1.045	0.583	kinesin family member C2	UP	NA	UP	9	0	NA	NA	NA	NA	1	1	1	0	1	0	0	1	1	1	0	1	0	1
KRT80	2.286	10.139	keratin 80	UP	DOWN	UP	8	-3	3	0	NA	NA	1	0	1	-1	-1	0	1	-1	1	1	0	1	1	1
LYNX1	-1.806	24.751	Ly6/neurotoxin 1	DOWN	NA	DOWN	0	-9	0	-3	0	-1	-1	-1	-1	-1	0	-1	-1	0	-1	0	0	-1	0	-1
MAST1	3.361	12.516	microtubule associated serine/threonine kinase 1	UP	NA	UP	5	0	NA	NA	NA	NA	1	0	0	0	0	0	1	0	1	1	0	0	0	1
MCM2	1.213	0.472	minichromosome maintenance complex component 2	UP	UP	UP	10	0	2	0	NA	NA	1	1	1	1	0	0	1	1	1	1	0	1	0	1
MKI67	2.174	1.055	marker of proliferation Ki-67	UP	UP	UP	13	0	6	0	1	0	1	1	1	1	1	1	1	1	1	1	1	1	0	1
MLF1IP	1.786	0.206		UP	NA	UP	11	0	NA	NA	NA	NA	1	1	0	0	1	1	1	1	1	1	1	0	1	1
MMP13	3.873	4.598	matrix metallopeptidase 13 (collagenase 3)	UP	NA	UP	8	0	5	0	1	0	1	1	1	1	0	0	0	0	1	1	0	1	1	0
MNX1	5.5	0.143	motor neuron and pancreas homeobox 1	UP	NA	UP	7	0	NA	NA	2	0	1	1	0	0	0	0	1	0	1	1	1	0	0	1
MT1A	-1.606	43.756	metallothionein 1A	DOWN	NA	DOWN	0	-10	0	-4	NA	NA	-1	-1	-1	-1	-1	0	0	-1	-1	-1	0	-1	-1	0
MT1E	-3.145	915.399	metallothionein 1E	DOWN	DOWN	DOWN	0	-9	NA	NA	NA	NA	0	-1	-1	0	-1	-1	-1	-1	0	-1	0	-1	-1	0
MTHFD2	1.593	0.065	methylenetetrahydrofolate dehydrogenase (NADP+ dependent) 2, methenyltetrahydrofolate cyclohydrolase	UP	not_DE	UP	6	0	NA	NA	1	0	1	1	1	0	0	0	0	0	1	1	0	0	0	1
MYEOV	4.284	11.962	myeloma overexpressed	UP	NA	UP	8	-3	4	-1	NA	NA	1	-1	1	-1	0	1	1	-1	1	1	0	1	0	1
MYL9	-1.791	678.287	myosin, light chain 9, regulatory	DOWN	not_DE	DOWN	0	-9	0	-3	0	-1	-1	-1	-1	0	-1	0	0	0	-1	-1	-1	-1	0	-1
NAALADL1	-6.744	3.004	N-acetylated alpha-linked acidic dipeptidase-like 1	DOWN	NA	DOWN	0	-10	NA	NA	NA	NA	-1	-1	-1	0	-1	0	-1	0	-1	-1	-1	-1	0	-1
NDN	-3.073	3.621	necdin, melanoma antigen (MAGE) family member	DOWN	NA	DOWN	0	-9	0	-2	NA	NA	-1	-1	-1	0	-1	0	-1	0	-1	-1	0	-1	0	-1
NKAPL	-8.43	2.277	NFKB activating protein-like	DOWN	NA	DOWN	0	-13	0	-2	NA	NA	-1	-1	-1	-1	-1	-1	-1	-1	-1	-1	-1	-1	0	-1
NMU	4.048	10.059	neuromedin U	UP	NA	UP	8	-1	2	0	NA	NA	1	1	1	-1	0	0	0	0	1	1	0	1	1	1
NUSAP1	1.993	1.169	nucleolar and spindle associated protein 1	UP	not_DE	UP	11	0	6	0	2	0	1	1	1	1	0	1	1	1	1	1	1	0	0	1
ONECUT2	4.924	0.434	one cut homeobox 2	UP	NA	UP	10	0	NA	NA	1	0	1	1	1	1	0	0	1	0	1	1	1	1	0	1
OSR1	-2.73	26.21	odd-skipped related transciption factor 1	DOWN	NA	DOWN	1	-10	0	-3	NA	NA	-1	-1	-1	-1	-1	0	0	1	-1	-1	0	-1	-1	-1
OTX1	5.449	0.195	orthodenticle homeobox 1	UP	NA	UP	9	0	4	0	NA	NA	1	1	1	0	0	0	0	1	1	1	1	1	0	1
PABPC1L	1.485	0.562	poly(A) binding protein, cytoplasmic 1-like	UP	not_DE	UP	9	-1	3	0	NA	NA	1	0	1	0	-1	1	1	1	1	1	0	1	0	1
PAMR1	-5.633	19.123	peptidase domain containing associated with muscle regeneration 1	DOWN	not_DE	DOWN	0	-8	0	-2	0	-1	-1	-1	-1	0	-1	0	-1	-1	0	0	0	-1	0	-1
PCDHGA12	-5.112	7.864	protocadherin gamma subfamily A, 12	DOWN	NA	DOWN	0	-7	NA	NA	NA	NA	-1	-1	0	0	-1	0	-1	0	-1	-1	0	0	0	-1
PDX1	2.646	0.896	pancreatic and duodenal homeobox 1	UP	NA	UP	5	0	NA	NA	NA	NA	1	0	1	0	0	0	0	0	1	1	0	1	0	0
PEAR1	-3.989	11.396	platelet endothelial aggregation receptor 1	DOWN	NA	DOWN	0	-7	0	-3	0	-1	0	-1	0	0	-1	0	-1	0	-1	-1	0	-1	0	-1
PHYHD1	-2.354	8.612	phytanoyl-CoA dioxygenase domain containing 1	DOWN	NA	DOWN	0	-11	0	-5	NA	NA	-1	-1	-1	-1	0	-1	-1	-1	-1	-1	-1	-1	0	0
PHYHIP	-4.294	29.978	phytanoyl-CoA 2-hydroxylase interacting protein	DOWN	NA	DOWN	1	-10	0	-4	NA	NA	-1	-1	-1	-1	-1	-1	-1	0	0	0	-1	-1	1	-1
PKMYT1	1.047	0.373	protein kinase, membrane associated tyrosine/threonine 1	UP	not_DE	UP	14	0	NA	NA	1	0	1	1	1	1	1	1	1	1	1	1	1	1	1	1
POLQ	1.793	0.117	polymerase (DNA directed), theta	UP	not_DE	UP	13	0	4	0	NA	NA	1	1	1	1	1	1	1	1	1	1	1	1	0	1
PRAME	8.685	0.253	preferentially expressed antigen in melanoma	UP	NA	UP	12	-1	5	0	NA	NA	1	1	1	1	-1	1	1	1	1	1	1	1	0	1
PTGS1	-1.429	48.263	prostaglandin-endoperoxide synthase 1 (prostaglandin G/H synthase and cyclooxygenase)	DOWN	not_DE	DOWN	1	-6	0	-2	NA	NA	-1	0	-1	0	-1	0	0	0	0	-1	-1	-1	0	1
PTRF	-1.154	1.779	polymerase I and transcript release factor	DOWN	not_DE	DOWN	0	-9	0	-2	0	-1	-1	-1	-1	0	-1	0	0	0	-1	-1	-1	-1	0	-1
RACGAP1	1.237	1.184	Rac GTPase activating protein 1	UP	not_DE	UP	9	0	2	0	NA	NA	1	1	1	1	1	0	0	1	1	1	0	0	0	1
RAD54L	2.158	18.457	RAD54-like (S. cerevisiae)	UP	NA	UP	11	0	NA	NA	NA	NA	1	1	1	1	0	1	1	1	1	1	0	1	0	1
RCOR2	3.071	5.905	REST corepressor 2	UP	NA	UP	9	-1	2	0	NA	NA	0	1	1	1	1	0	0	1	1	1	-1	1	0	1
RDM1	1.704	0.769	RAD52 motif 1	UP	NA	UP	9	0	2	0	NA	NA	1	1	1	1	0	0	1	1	1	1	0	0	0	1
RFC4	1.248	0.499	replication factor C (activator 1) 4, 37kDa	UP	not_DE	UP	8	0	NA	NA	NA	NA	1	1	1	1	0	0	0	1	1	1	0	0	0	1
RHPN1	3.633	0.899	rhophilin, Rho GTPase binding protein 1	UP	NA	UP	7	0	2	0	NA	NA	1	1	1	0	0	0	0	1	1	0	0	1	0	1
RNFT2	2.105	5.716	ring finger protein, transmembrane 2	UP	NA	UP	10	0	NA	NA	3	0	1	1	1	0	0	0	1	1	1	1	0	1	1	1
S1PR1	-3.41	29.975	sphingosine-1-phosphate receptor 1	DOWN	NA	DOWN	0	-9	0	-2	NA	NA	-1	-1	-1	0	-1	0	-1	0	-1	-1	0	-1	0	-1
SERP2	-3.282	5.312	stress-associated endoplasmic reticulum protein family member 2	DOWN	NA	DOWN	0	-7	NA	NA	0	-1	-1	0	0	0	-1	0	0	0	-1	-1	-1	-1	0	-1
SERPING1	-3.392	1.513	serpin peptidase inhibitor, clade G (C1 inhibitor), member 1	DOWN	not_DE	DOWN	0	-7	NA	NA	NA	NA	-1	-1	0	0	-1	0	0	-1	-1	-1	0	0	0	-1
SFRP1	-1.641	46.984	secreted frizzled-related protein 1	DOWN	not_DE	DOWN	0	-12	0	-6	0	-1	-1	-1	-1	-1	-1	-1	-1	-1	-1	0	0	-1	-1	-1
SGOL1	2.653	1.462	shugoshin-like 1 (S. pombe)	UP	NA	UP	12	0	4	0	NA	NA	1	1	1	1	0	1	1	1	1	1	1	1	0	1
SKA3	1.653	2.285	spindle and kinetochore associated complex subunit 3	UP	NA	UP	12	0	NA	NA	2	0	1	1	1	1	0	1	1	1	1	1	1	1	0	1
SLC7A11	1.921	0.059	solute carrier family 7 (anionic amino acid transporter light chain, xc- system), member 11	UP	NA	UP	12	0	3	0	1	0	0	1	1	1	1	1	1	1	1	1	1	1	0	1
SLCO1B3	3.846	0.51	solute carrier organic anion transporter family, member 1B3	UP	NA	UP	7	-1	3	0	NA	NA	1	0	1	1	0	0	0	-1	1	1	1	1	0	0
SLIT3	-1.372	2.561	slit homolog 3 (Drosophila)	DOWN	NA	DOWN	0	-10	0	-6	NA	NA	-1	-1	-1	0	-1	0	-1	0	-1	-1	-1	-1	0	-1
SRCIN1	3.214	1.398	SRC kinase signaling inhibitor 1	UP	not_DE	UP	6	0	NA	NA	NA	NA	1	0	1	0	0	0	1	0	1	0	0	1	1	0
SRPX	-2.241	101	sushi-repeat containing protein, X-linked	DOWN	not_DE	DOWN	0	-11	NA	NA	0	-1	-1	-1	-1	0	0	0	-1	-1	-1	-1	-1	-1	-1	-1
TCEAL7	-7.82	41.786	transcription elongation factor A (SII)-like 7	DOWN	NA	DOWN	0	-11	NA	NA	NA	NA	-1	-1	-1	0	-1	0	-1	0	-1	-1	-1	-1	-1	-1
TERT	7	0.628	telomerase reverse transcriptase	UP	not_DE	UP	7	0	NA	NA	1	0	1	0	0	1	0	0	0	1	1	1	0	1	0	1
THBD	-1.421	20.46	thrombomodulin	DOWN	NA	DOWN	0	-7	NA	NA	NA	NA	0	-1	0	0	-1	0	-1	-1	-1	-1	0	0	0	-1
TIMP3	-2.297	347.297	TIMP metallopeptidase inhibitor 3	DOWN	not_DE	DOWN	0	-8	0	-2	NA	NA	-1	-1	0	0	-1	0	-1	0	-1	-1	-1	0	0	-1
TM4SF19	3.907	0.023	transmembrane 4 L six family member 19	UP	NA	UP	9	0	NA	NA	NA	NA	1	0	1	1	0	1	1	1	0	1	0	1	0	1
TMEM145	3.306	0.274	transmembrane protein 145	UP	NA	UP	9	0	NA	NA	NA	NA	1	1	0	0	1	1	1	1	1	1	0	1	0	0
TMEM220	-1.025	4.691	transmembrane protein 220	DOWN	NA	DOWN	0	-11	0	-4	NA	NA	-1	-1	-1	-1	-1	0	0	-1	-1	-1	0	-1	-1	-1
TNFAIP8L3	-3.456	2.763	tumor necrosis factor, alpha-induced protein 8-like 3	DOWN	NA	DOWN	1	-8	0	-2	NA	NA	-1	0	-1	-1	1	0	0	0	-1	-1	0	-1	-1	-1
TNNT1	4.703	0.945	troponin T type 1 (skeletal, slow)	UP	NA	UP	10	0	3	0	NA	NA	1	1	1	0	0	1	1	1	1	1	0	1	0	1
TOP2A	2.373	5.229	topoisomerase (DNA) II alpha 170kDa	UP	UP	UP	14	0	6	0	2	0	1	1	1	1	1	1	1	1	1	1	1	1	1	1
TP73	4.154	0.197	tumor protein p73	UP	NA	UP	8	0	NA	NA	NA	NA	1	0	1	0	0	1	1	1	0	1	0	1	0	1
TPM2	-3.653	581.943	tropomyosin 2 (beta)	DOWN	not_DE	DOWN	1	-9	0	-3	0	-1	-1	-1	-1	-1	-1	0	-1	1	0	0	-1	-1	0	-1
TSPYL5	-2.486	15.462	TSPY-like 5	DOWN	NA	DOWN	0	-7	NA	NA	0	-1	-1	0	-1	-1	0	-1	0	-1	0	0	0	-1	0	-1
TWIST2	-2.098	15.65	twist family bHLH transcription factor 2	DOWN	NA	DOWN	0	-9	0	-3	NA	NA	-1	-1	-1	0	-1	0	0	0	-1	0	-1	-1	-1	-1
XRCC2	1.865	1.566	X-ray repair complementing defective repair in Chinese hamster cells 2	UP	NA	UP	11	0	4	0	NA	NA	1	1	1	1	0	1	1	1	1	1	0	1	0	1
ZIC2	6.199	1.822	Zic family member 2	UP	NA	UP	9	0	5	0	NA	NA	1	0	1	1	0	0	0	1	1	1	1	1	0	1
ZIC5	7.007	0.159	Zic family member 5	UP	NA	UP	9	0	2	0	NA	NA	1	0	1	1	0	0	0	1	1	1	1	1	0	1
ZNF677	-1.937	4.13	zinc finger protein 677	DOWN	NA	DOWN	0	-10	NA	NA	NA	NA	-1	-1	-1	-1	0	-1	-1	0	-1	-1	0	-1	0	-1

## Sheet: PROTEOME CONFIRMED
PROTEOME CONFIRMED - this provides a list of 128 protein coding genes that are differentially expressed in FANTOM5 cancer cell lines (DE pipeline + gene wise absFC > 2) and that are differentially expressed in TCGA colorectal tumors on protein level.
													Differential expression in specific tumor types from TCGA RNA-seq data
gene_symbol	FANTOM5 log2FC	FANTOM5 mean_tpm	description	FANTOM5 Pan- Cancer DE	Zhang_COAD_proteome_DE	TCGA Pan-Cancer DE	TCGA UP	TCGA DOWN	Cabanski UP	Cabanski DOWN	Oncomine UP	Oncomine DOWN	BLCA	BRCA	COAD	HNSC	KICH	KIRC	KIRP	LIHC	LUAD	LUSC	PRAD	READ	THCA	UCEC
ANPEP	-2.6	92.447	alanyl (membrane) aminopeptidase	DOWN	DOWN	DOWN	1	-7	1	-1	NA	NA	0	-1	-1	0	-1	0	-1	0	-1	-1	0	-1	0	1
APOD	-1.611	28.667	apolipoprotein D	DOWN	DOWN	DOWN	0	-11	0	-4	0	-1	-1	-1	-1	-1	-1	-1	-1	0	0	-1	0	-1	-1	-1
ASNS	1.266	1.157	asparagine synthetase (glutamine-hydrolyzing)	UP	UP	UP	8	0	NA	NA	NA	NA	0	0	1	0	1	0	1	1	1	1	0	1	0	1
BASP1	-2.298	33.681	brain abundant, membrane attached signal protein 1	DOWN	DOWN	NA	NA	NA	NA	NA	NA	NA	NA	NA	NA	NA	NA	NA	NA	NA	NA	NA	NA	NA	NA	NA
CD55	1.32	0.234	CD55 molecule, decay accelerating factor for complement (Cromer blood group)	UP	UP	NA	NA	NA	NA	NA	NA	NA	NA	NA	NA	NA	NA	NA	NA	NA	NA	NA	NA	NA	NA	NA
CSE1L	1.094	0.182	CSE1 chromosome segregation 1-like (yeast)	UP	UP	NA	NA	NA	NA	NA	NA	NA	NA	NA	NA	NA	NA	NA	NA	NA	NA	NA	NA	NA	NA	NA
CYGB	-4.19	32.051	cytoglobin	DOWN	DOWN	NA	NA	NA	NA	NA	NA	NA	NA	NA	NA	NA	NA	NA	NA	NA	NA	NA	NA	NA	NA	NA
DCN	-3.973	101.922	decorin	DOWN	DOWN	DOWN	0	-13	0	-4	0	-1	-1	-1	-1	0	-1	-1	-1	-1	-1	-1	-1	-1	-1	-1
DDX21	1.152	0.141	DEAD (Asp-Glu-Ala-Asp) box helicase 21	UP	UP	NA	NA	NA	NA	NA	NA	NA	NA	NA	NA	NA	NA	NA	NA	NA	NA	NA	NA	NA	NA	NA
EML4	1.339	0.056	echinoderm microtubule associated protein like 4	UP	UP	NA	NA	NA	NA	NA	NA	NA	NA	NA	NA	NA	NA	NA	NA	NA	NA	NA	NA	NA	NA	NA
EPB41	2.534	5.808	erythrocyte membrane protein band 4.1 (elliptocytosis 1, RH-linked)	UP	UP	NA	NA	NA	NA	NA	NA	NA	NA	NA	NA	NA	NA	NA	NA	NA	NA	NA	NA	NA	NA	NA
FABP4	-3.732	286.631	fatty acid binding protein 4, adipocyte	DOWN	DOWN	DOWN	1	-11	0	-4	NA	NA	-1	-1	-1	-1	0	0	-1	1	-1	-1	-1	-1	-1	-1
GPX3	-1.288	180.29	glutathione peroxidase 3 (plasma)	DOWN	DOWN	DOWN	0	-10	0	-6	0	-1	-1	-1	-1	-1	-1	0	-1	0	-1	-1	-1	-1	0	0
HSPB6	-6.36	319.99	heat shock protein, alpha-crystallin-related, B6	DOWN	DOWN	DOWN	0	-13	0	-8	0	-1	-1	-1	-1	-1	-1	-1	-1	0	-1	-1	-1	-1	-1	-1
KIAA1598	1.349	2.271	KIAA1598	UP	UP	NA	NA	NA	NA	NA	NA	NA	NA	NA	NA	NA	NA	NA	NA	NA	NA	NA	NA	NA	NA	NA
MAPT	2.945	7.833	microtubule-associated protein tau	UP	UP	NA	NA	NA	0	-2	NA	NA	NA	NA	NA	NA	NA	NA	NA	NA	NA	NA	NA	NA	NA	NA
MCM2	1.213	0.472	minichromosome maintenance complex component 2	UP	UP	UP	10	0	2	0	NA	NA	1	1	1	1	0	0	1	1	1	1	0	1	0	1
MKI67	2.174	1.055	marker of proliferation Ki-67	UP	UP	UP	13	0	6	0	1	0	1	1	1	1	1	1	1	1	1	1	1	1	0	1
MSH6	1.191	0.653	mutS homolog 6	UP	UP	NA	NA	NA	NA	NA	NA	NA	NA	NA	NA	NA	NA	NA	NA	NA	NA	NA	NA	NA	NA	NA
MSI2	1.423	1.365	musashi RNA-binding protein 2	UP	UP	NA	NA	NA	NA	NA	1	0	NA	NA	NA	NA	NA	NA	NA	NA	NA	NA	NA	NA	NA	NA
MT1E	-3.145	915.399	metallothionein 1E	DOWN	DOWN	DOWN	0	-9	NA	NA	NA	NA	0	-1	-1	0	-1	-1	-1	-1	0	-1	0	-1	-1	0
MYLK3	1.946	0.089	myosin light chain kinase 3	UP	UP	DOWN	0	-6	NA	NA	NA	NA	0	0	0	-1	-1	-1	-1	0	-1	-1	0	0	0	0
NASP	1.807	1.674	nuclear autoantigenic sperm protein (histone-binding)	UP	UP	NA	NA	NA	NA	NA	NA	NA	NA	NA	NA	NA	NA	NA	NA	NA	NA	NA	NA	NA	NA	NA
NEK10	3.133	1.025	NIMA-related kinase 10	UP	UP	NA	NA	NA	NA	NA	NA	NA	NA	NA	NA	NA	NA	NA	NA	NA	NA	NA	NA	NA	NA	NA
NPM1	1.109	0.425	nucleophosmin (nucleolar phosphoprotein B23, numatrin)	UP	UP	NA	NA	NA	NA	NA	NA	NA	NA	NA	NA	NA	NA	NA	NA	NA	NA	NA	NA	NA	NA	NA
NUP107	1.003	0.138	nucleoporin 107kDa	UP	UP	NA	NA	NA	NA	NA	NA	NA	NA	NA	NA	NA	NA	NA	NA	NA	NA	NA	NA	NA	NA	NA
PLD3	-1.266	89.443	phospholipase D family, member 3	DOWN	DOWN	NA	NA	NA	NA	NA	NA	NA	NA	NA	NA	NA	NA	NA	NA	NA	NA	NA	NA	NA	NA	NA
PRKCDBP	-1.574	86.326	protein kinase C, delta binding protein	DOWN	DOWN	NA	NA	NA	NA	NA	NA	NA	NA	NA	NA	NA	NA	NA	NA	NA	NA	NA	NA	NA	NA	NA
PRKDC	1.223	0.205	protein kinase, DNA-activated, catalytic polypeptide	UP	UP	NA	NA	NA	NA	NA	NA	NA	NA	NA	NA	NA	NA	NA	NA	NA	NA	NA	NA	NA	NA	NA
RBMX	1.055	0.492	RNA binding motif protein, X-linked	UP	UP	NA	NA	NA	NA	NA	NA	NA	NA	NA	NA	NA	NA	NA	NA	NA	NA	NA	NA	NA	NA	NA
TMPO	1.216	1.773	thymopoietin	UP	UP	NA	NA	NA	NA	NA	NA	NA	NA	NA	NA	NA	NA	NA	NA	NA	NA	NA	NA	NA	NA	NA
TOP2A	2.373	5.229	topoisomerase (DNA) II alpha 170kDa	UP	UP	UP	14	0	6	0	2	0	1	1	1	1	1	1	1	1	1	1	1	1	1	1
