# Supplementary material for: Transcriptome Analysis of Recurrently Deregulated Genes across Multiple Cancers Identifies New Pan-Cancer Biomarkers
Source: Oxford University Press journal article supplement (doi:10.1158/0008-5472.can-15-0484), 2015-11-09
Supplement: 00085472can150484-sup-145596_2_supp_3145147_nlpkmp.xlsx [file 00085472can150484-sup-145596_2_supp_3145147_nlpkmp.xlsx]

## Sheet: Readme
Readme for Supplementary table10
This supplement contains a summary of the lncRNAs genes detected as differentially expressed in the FANTOM5 analysis
ALL - this provides a summary for 271 lncRNAs genes detected as recurrently up or down reulated across multiple cancer cell lines compared to primary cells
CORE - this provides a list of lncRNAs that are differentially expressed in primary cells (FANTOM5) and at least two cancer types (in the same direciton) in a)miTranscriptome, b) in-house TCGA and c in Cabanski et al.
F5&miTranscriptome - this provides a list of 63 lncRNAs that are differentially expressed in primary cells (FANTOM5) and in miTranscriptome
F5 TCGA, Cabanski - this provides l overlap between differentially expressed lncRNAs from FANTOM5 analysis and TCGA in-house analysis and TCGA analysis by Cabanski at al.
Legend:
gene_name - GENCODE19 gene name, if not available then miTranscriptome geneID
func_name (miTr) - lncRNA name as proposed in miTranscriptome publication.
mean_tpm - mean tag per million in FANTOM5 CAGE data collection
FANTOM5 Pan-Cancer DE - FANTOM5 Pan cancer analysis based on CAGE profiling in cancer cell lines
miTr_UP - number of TCGA tumor types in which given gene is up-regulated, as reported in miTransciptome study Iyer, M. K., Niknafs, Y. S., Malik, R., Singhal, U., Sahu, A., Hosono, Y., et al. (2015). The landscape of long noncoding RNAs in the human transcriptome. Nat Genet. doi:10.1038/ng.3192
miTr_UP - number of TCGA tumor types in which given gene is down-regulated, as reported in miTransciptome study Iyer, M. K., Niknafs, Y. S., Malik, R., Singhal, U., Sahu, A., Hosono, Y., et al. (2015). The landscape of long noncoding RNAs in the human transcriptome. Nat Genet. doi:10.1038/ng.3192
Differential expression in miTranscriptome analysis (TCGA tumors) - information in which tumor types given lncRNA was up regulated (1) or downregulated (-1). 0 - not differentially expressed
description - gene description (if available)
PLAR lncRNA annotation - lncRNA annotation from PLAR (http://webhome.weizmann.ac.il/home/igoru/PLAR/)

## Sheet: ALL
Supplementary table 10 A
ALL - this provides a summary for 271 lncRNAs genes detected as recurrently up or down reulated across multiple cancer cell lines compared to primary cells
							Differential expression in miTranscriptome analysis (TCGA tumors)													PLAR lncRNA annotation
gene_name	func_name (miTr)	lncRNA type	mean_tpm	FANTOM5 Pan-Cancer DE	miTr_UP	miTr_DOWN	bladder	breast	head_neck	kich	kirc	kirp	liver	luad	lusc	prostate	stomach	thyroid	description	gene_type_plar	transcript_id_plar
ZNF667-AS1	ZNF667-AS1	linc	18.14	DOWN	0	-1	0	0	0	0	-1	0	0	0	0	0	0	0	ZNF667 antisense RNA 1 (head to head)	Repetitive	Repetitive|3P|XLOC_034301|TCONS_00140041:9.97639
ZNF542		pseudogene	9.052	DOWN	NA	NA	NA	NA	NA	NA	NA	NA	NA	NA	NA	NA	NA	NA	zinc finger protein 542	EnsCodingFull	EnsCodingFull|3P|XLOC_034298|TCONS_00140010:0.316117
ZNRF2P2		pseudogene	0.256	UP	NA	NA	NA	NA	NA	NA	NA	NA	NA	NA	NA	NA	NA	NA	zinc and ring finger 2 pseudogene 2
ZNRF2P1		pseudogene	1.115	UP	NA	NA	NA	NA	NA	NA	NA	NA	NA	NA	NA	NA	NA	NA	zinc and ring finger 2 pseudogene 1
ZBED3-AS1		antisense	0.175	UP	NA	NA	NA	NA	NA	NA	NA	NA	NA	NA	NA	NA	NA	NA	ZBED3 antisense RNA 1	linc	linc|3P|XLOC_055937|TCONS_00220236:0.275342
USP2-AS1		antisense	1.19	UP	NA	NA	NA	NA	NA	NA	NA	NA	NA	NA	NA	NA	NA	NA	USP2 antisense RNA 1 (head to head)	linc	linc|3P|XLOC_011620|TCONS_00048158:0.536816
TSPY26P		pseudogene	3.563	DOWN	NA	NA	NA	NA	NA	NA	NA	NA	NA	NA	NA	NA	NA	NA	testis specific protein, Y-linked 26, pseudogene
TERC		linc	2.189	UP	NA	NA	NA	NA	NA	NA	NA	NA	NA	NA	NA	NA	NA	NA	telomerase RNA component	TooLow	TooLow|TCONS_00201438:0.184267
SDHAP3		pseudogene	0.308	UP	NA	NA	NA	NA	NA	NA	NA	NA	NA	NA	NA	NA	NA	NA	succinate dehydrogenase complex, subunit A, flavoprotein pseudogene 3
SMPD4P1		pseudogene	0.271	UP	NA	NA	NA	NA	NA	NA	NA	NA	NA	NA	NA	NA	NA	NA	sphingomyelin phosphodiesterase 4, neutral membrane (neutral sphingomyelinase-3) pseudogene 1	linc	linc|3P|XLOC_046500|TCONS_00183807:0.390746
SNORA68		small ncRNAs	0.538	UP	NA	NA	NA	NA	NA	NA	NA	NA	NA	NA	NA	NA	NA	NA	small nucleolar RNA, H/ACA box 68
SNHG18	SNHG18	linc	17.041	DOWN	0	-1	0	0	0	0	0	0	0	0	0	-1	0	0	small nucleolar RNA host gene 18 (non-protein coding)
SNHG1		lncrna	0.056	UP	NA	NA	NA	NA	NA	NA	NA	NA	NA	NA	NA	NA	NA	NA	small nucleolar RNA host gene 1 (non-protein coding)	TooLow	TooLow|TCONS_00052594:0.0873024
SCARNA14		small ncRNAs	0.047	UP	NA	NA	NA	NA	NA	NA	NA	NA	NA	NA	NA	NA	NA	NA	small Cajal body-specific RNA 14
SATB2-AS1		antisense	0.203	UP	NA	NA	NA	NA	NA	NA	NA	NA	NA	NA	NA	NA	NA	NA	SATB2 antisense RNA 1
RNU6-781P		small ncRNAs	0.754	UP	NA	NA	NA	NA	NA	NA	NA	NA	NA	NA	NA	NA	NA	NA	RNA, U6 small nuclear 781, pseudogene
RNU5F-1		small ncRNAs	556.321	UP	NA	NA	NA	NA	NA	NA	NA	NA	NA	NA	NA	NA	NA	NA	RNA, U5F small nuclear 1
RNU5D-1	THCAT430	small ncRNAs	0.09	UP	0	-1	0	0	0	0	0	0	0	0	0	0	0	-1	RNA, U5D small nuclear 1
RNU2-64P		small ncRNAs	1.18	UP	NA	NA	NA	NA	NA	NA	NA	NA	NA	NA	NA	NA	NA	NA	RNA, U2 small nuclear 64, pseudogene
RNU1-85P		small ncRNAs	6.879	UP	NA	NA	NA	NA	NA	NA	NA	NA	NA	NA	NA	NA	NA	NA	RNA, U1 small nuclear 85, pseudogene
RNU1-122P		small ncRNAs	4.777	UP	NA	NA	NA	NA	NA	NA	NA	NA	NA	NA	NA	NA	NA	NA	RNA, U1 small nuclear 122, pseudogene
RNA5SP18		small ncRNAs	0.067	UP	NA	NA	NA	NA	NA	NA	NA	NA	NA	NA	NA	NA	NA	NA	RNA, 5S ribosomal pseudogene 18
RHPN1-AS1		antisense	0.805	UP	NA	NA	NA	NA	NA	NA	NA	NA	NA	NA	NA	NA	NA	NA	RHPN1 antisense RNA 1 (head to head)	TooLow	TooLow|TCONS_00280225:0.93711
RAET1K		pseudogene	0.251	UP	NA	NA	NA	NA	NA	NA	NA	NA	NA	NA	NA	NA	NA	NA	retinoic acid early transcript 1K pseudogene	linc	linc|3P|XLOC_061567|TCONS_00244278:0.530643
PVT1		lncrna	0.407	UP	NA	NA	NA	NA	NA	NA	NA	NA	NA	NA	NA	NA	NA	NA	Pvt1 oncogene (non-protein coding)
PVRL3-AS1		antisense	0.204	UP	NA	NA	NA	NA	NA	NA	NA	NA	NA	NA	NA	NA	NA	NA	PVRL3 antisense RNA 1
PCDHB9		pseudogene	1.345	UP	NA	NA	NA	NA	NA	NA	NA	NA	NA	NA	NA	NA	NA	NA	protocadherin beta 9
PCAT7	CAT1167	antisense	0.086	UP	2	0	0	0	1	0	0	0	0	0	0	1	0	0	prostate cancer associated transcript 7 (non-protein coding)	EnsASCoding	EnsASCoding|3P|XLOC_073002|TCONS_00284422:0.112483
PCAT1		linc	0.078	UP	NA	NA	NA	NA	NA	NA	NA	NA	NA	NA	NA	NA	NA	NA	prostate cancer associated transcript 1 (non-protein coding)
MNX1-AS1	MNX1-AS1	antisense	0.198	UP	4	0	0	1	0	0	0	0	0	1	1	1	0	0	MNX1 antisense RNA 1 (head to head)	linc	linc|3P|XLOC_066224|TCONS_00262010:2.83731
MIR137HG		linc	0.099	UP	NA	NA	NA	NA	NA	NA	NA	NA	NA	NA	NA	NA	NA	NA	MIR137 host gene (non-protein coding)
MIR548T		small ncRNAs	0.092	UP	NA	NA	NA	NA	NA	NA	NA	NA	NA	NA	NA	NA	NA	NA	microRNA 548t
MIR4428		small ncRNAs	0.261	UP	NA	NA	NA	NA	NA	NA	NA	NA	NA	NA	NA	NA	NA	NA	microRNA 4428
MIR3621		small ncRNAs	6.035	UP	NA	NA	NA	NA	NA	NA	NA	NA	NA	NA	NA	NA	NA	NA	microRNA 3621
MFI2-AS1	MFI2-AS1	antisense	1.301	UP	2	0	0	1	0	0	0	0	0	0	1	0	0	0	MFI2 antisense RNA 1	linc	linc|3P|XLOC_048660|TCONS_00194733:3.92114
MT1L		pseudogene	116.644	DOWN	NA	NA	NA	NA	NA	NA	NA	NA	NA	NA	NA	NA	NA	NA	metallothionein 1L (gene/pseudogene)	EnsCodingFull	EnsCodingFull|3P|XLOC_026032|TCONS_00105706:13.4166
MCF2L-AS1	MCF2L-AS1	antisense	1.474	UP	2	-1	0	0	0	1	-1	0	0	0	0	1	0	0	MCF2L antisense RNA 1	EnsASCoding	EnsASCoding|3P|XLOC_019135|TCONS_00079895:1.07366
MEG3	MEG3	linc	182.23	DOWN	0	-2	-1	-1	0	0	0	0	0	0	0	0	0	0	maternally expressed 3 (non-protein coding)	EnsCodingFull	EnsCodingFull|3P|XLOC_021113|TCONS_00085441:6.46736
MSL3P1		pseudogene	8.564	DOWN	NA	NA	NA	NA	NA	NA	NA	NA	NA	NA	NA	NA	NA	NA	male-specific lethal 3 homolog (Drosophila) pseudogene 1	linc	linc|3P|XLOC_039804|TCONS_00165779:9.71259
MAGI2-AS3		lncrna	8.667	DOWN	NA	NA	NA	NA	NA	NA	NA	NA	NA	NA	NA	NA	NA	NA	MAGI2 antisense RNA 3	linc	linc|3P|XLOC_065690|TCONS_00258568:15.7043
LINC00910		linc	0.796	UP	NA	NA	NA	NA	NA	NA	NA	NA	NA	NA	NA	NA	NA	NA	long intergenic non-protein coding RNA 910	Repetitive	Repetitive|3P|XLOC_029915|TCONS_00125229:0.322952
LINC00898	LINC00898	linc	0.104	UP	3	0	0	0	1	0	0	0	0	0	1	1	0	0	long intergenic non-protein coding RNA 898	linc	linc|3P|XLOC_046828|TCONS_00186160:0.624417
LINC00847		linc	6.484	DOWN	NA	NA	NA	NA	NA	NA	NA	NA	NA	NA	NA	NA	NA	NA	long intergenic non-protein coding RNA 847	linc	linc|3P|XLOC_056588|TCONS_00224227:0.669655
LINC00839	LINC00839	linc	2.32	UP	0	-1	0	0	0	0	0	-1	0	0	0	0	0	0	long intergenic non-protein coding RNA 839	EnsCodingFragment	EnsCodingFragment|3P|XLOC_007429|TCONS_00030471:2.87924
LINC00669	LINC00669	linc	4.096	UP	2	0	0	0	0	0	0	0	0	1	1	0	0	0	long intergenic non-protein coding RNA 669	Repetitive	Repetitive|3P|XLOC_032328|TCONS_00133171:11.0491
LINC00662	LINC00662	linc	1.083	UP	0	-1	0	0	0	0	0	0	0	0	0	0	0	-1	long intergenic non-protein coding RNA 662	linc	linc|3P|XLOC_034755|TCONS_00142644:7.06082
LINC00624		linc	1.236	UP	NA	NA	NA	NA	NA	NA	NA	NA	NA	NA	NA	NA	NA	NA	long intergenic non-protein coding RNA 624	Repetitive	Repetitive|3P|XLOC_003093|TCONS_00020301:5.7249
LINC00511		linc	0.256	UP	NA	NA	NA	NA	NA	NA	NA	NA	NA	NA	NA	NA	NA	NA	long intergenic non-protein coding RNA 511
LINC00494	LINC00494	linc	0.379	UP	1	0	0	0	0	0	0	1	0	0	0	0	0	0	long intergenic non-protein coding RNA 494	linc	linc|3P|XLOC_043124|TCONS_00171500:0.698543
LINC00407		linc	0.801	UP	NA	NA	NA	NA	NA	NA	NA	NA	NA	NA	NA	NA	NA	NA	long intergenic non-protein coding RNA 407
LINC00355		linc	0.418	UP	NA	NA	NA	NA	NA	NA	NA	NA	NA	NA	NA	NA	NA	NA	long intergenic non-protein coding RNA 355	linc	linc|3P|XLOC_018930|TCONS_00079016:0.21899
LINC00243		lncrna	0.133	UP	NA	NA	NA	NA	NA	NA	NA	NA	NA	NA	NA	NA	NA	NA	long intergenic non-protein coding RNA 243
LINC00221		linc	0.196	UP	NA	NA	NA	NA	NA	NA	NA	NA	NA	NA	NA	NA	NA	NA	long intergenic non-protein coding RNA 221	linc	linc|3P|XLOC_021209|TCONS_00086096:1.74982
LINC01059		linc	0.106	UP	NA	NA	NA	NA	NA	NA	NA	NA	NA	NA	NA	NA	NA	NA	long intergenic non-protein coding RNA 1059	EnsCodingFull	EnsCodingFull|3P|XLOC_011648|TCONS_00048371:1.11139
LINC01058	LINC01058	linc	0.497	UP	0	-4	0	-1	0	-1	0	0	0	0	0	-1	0	-1	long intergenic non-protein coding RNA 1058	linc	linc|3P|XLOC_018730|TCONS_00077939:1.10543
LINC01021	ESAT107	linc	0.062	UP	NA	NA	NA	NA	NA	NA	NA	NA	NA	NA	NA	NA	NA	NA	long intergenic non-protein coding RNA 1021	Repetitive	Repetitive|3P|XLOC_055682|TCONS_00218681:0.218886
LINC01006		lncrna	8.111	DOWN	NA	NA	NA	NA	NA	NA	NA	NA	NA	NA	NA	NA	NA	NA	long intergenic non-protein coding RNA 1006	EnsCodingFragment	EnsCodingFragment|3P|XLOC_067220|TCONS_00268174:4.66852
LIFR-AS1		antisense	0.119	UP	NA	NA	NA	NA	NA	NA	NA	NA	NA	NA	NA	NA	NA	NA	LIFR antisense RNA 1
LRRC37A4P		pseudogene	0.144	UP	NA	NA	NA	NA	NA	NA	NA	NA	NA	NA	NA	NA	NA	NA	leucine rich repeat containing 37, member A4, pseudogene
LAMTOR5-AS1		antisense	0.204	UP	NA	NA	NA	NA	NA	NA	NA	NA	NA	NA	NA	NA	NA	NA	LAMTOR5 antisense RNA 1
KCNQ1OT1		antisense	1.633	UP	NA	NA	NA	NA	NA	NA	NA	NA	NA	NA	NA	NA	NA	NA	KCNQ1 opposite strand/antisense transcript 1 (non-protein coding)
IFITM9P		pseudogene	0.321	DOWN	NA	NA	NA	NA	NA	NA	NA	NA	NA	NA	NA	NA	NA	NA	interferon induced transmembrane protein 9 pseudogene
HOXA11-AS	HOXA11-AS	antisense	0.431	UP	2	-1	0	0	1	0	-1	0	0	0	1	0	0	0	HOXA11 antisense RNA
GUSBP2		pseudogene	0.164	UP	NA	NA	NA	NA	NA	NA	NA	NA	NA	NA	NA	NA	NA	NA	glucuronidase, beta pseudogene 2	linc	linc|3P|XLOC_060820|TCONS_00239513:0.720629
FTX		linc	0.85	UP	NA	NA	NA	NA	NA	NA	NA	NA	NA	NA	NA	NA	NA	NA	FTX transcript, XIST regulator (non-protein coding)
FEZF1-AS1	FEZF1-AS1	antisense	0.958	UP	2	0	0	0	0	0	0	0	0	1	1	0	0	0	FEZF1 antisense RNA 1	linc	linc|3P|XLOC_065937|TCONS_00260280:0.104611
FTH1P22		pseudogene	0.619	DOWN	NA	NA	NA	NA	NA	NA	NA	NA	NA	NA	NA	NA	NA	NA	ferritin, heavy polypeptide 1 pseudogene 22	TooLow	TooLow|TCONS_00019826:0.722442
DCLRE1CP1		pseudogene	9.917	UP	NA	NA	NA	NA	NA	NA	NA	NA	NA	NA	NA	NA	NA	NA	DNA cross-link repair 1C pseudogene 1	EnsCodingFull	EnsCodingFull|3P|XLOC_008214|TCONS_00034886:15.0179
DLX6-AS2	DLX6-AS1	antisense	0.259	UP	2	0	0	0	0	0	0	0	0	1	1	0	0	0	DLX6 antisense RNA 2
DLGAP1-AS2		antisense	0.338	UP	NA	NA	NA	NA	NA	NA	NA	NA	NA	NA	NA	NA	NA	NA	DLGAP1 antisense RNA 2	TooLow	TooLow|TCONS_00130121:0.0166821
DISC1FP1		lncrna	1.137	UP	NA	NA	NA	NA	NA	NA	NA	NA	NA	NA	NA	NA	NA	NA	DISC1 fusion partner 1 (non-protein coding)	linc	linc|3P|XLOC_011435|TCONS_00046903:0.148794
DGCR5	DGCR5	antisense	3.738	UP	3	0	0	0	0	0	1	1	0	1	0	0	0	0	DiGeorge syndrome critical region gene 5 (non-protein coding)	linc	linc|3P|XLOC_046030|TCONS_00180666:1.27408
CSAG4		pseudogene	0.22	UP	NA	NA	NA	NA	NA	NA	NA	NA	NA	NA	NA	NA	NA	NA	CSAG family, member 4 (pseudogene)	EnsCodingFull	EnsCodingFull|3P|XLOC_077187|TCONS_00301911:1.34883
CT49		linc	0.33	UP	NA	NA	NA	NA	NA	NA	NA	NA	NA	NA	NA	NA	NA	NA	cancer/testis antigen 49 (non-protein coding)	linc	linc|3P|XLOC_055633|TCONS_00218497:0.316
BAGE2		pseudogene	2.036	UP	NA	NA	NA	NA	NA	NA	NA	NA	NA	NA	NA	NA	NA	NA	B melanoma antigen family, member 2	Repetitive	Repetitive|3P|XLOC_045150|TCONS_00178289:0.832881
ARHGEF26-AS1		lncrna	0.51	UP	NA	NA	NA	NA	NA	NA	NA	NA	NA	NA	NA	NA	NA	NA	ARHGEF26 antisense RNA 1	linc	linc|3P|XLOC_049489|TCONS_00200973:5.33781
G000374		linc	0.811	UP	NA	NA	NA	NA	NA	NA	NA	NA	NA	NA	NA	NA	NA	NA
RP11-764K9.4		pseudogene	0.659	UP	NA	NA	NA	NA	NA	NA	NA	NA	NA	NA	NA	NA	NA	NA		EnsCodingFragment	EnsCodingFragment|3P|XLOC_073706|TCONS_00288805:0.476256
AC006262.5		linc	0.223	UP	NA	NA	NA	NA	NA	NA	NA	NA	NA	NA	NA	NA	NA	NA		linc	linc|3P|XLOC_034997|TCONS_00144020:1.3673
AC007050.1		small ncRNAs	0.129	UP	NA	NA	NA	NA	NA	NA	NA	NA	NA	NA	NA	NA	NA	NA
AC012501.2		lncrna	0.093	UP	NA	NA	NA	NA	NA	NA	NA	NA	NA	NA	NA	NA	NA	NA
AC018890.6		antisense	0.249	UP	NA	NA	NA	NA	NA	NA	NA	NA	NA	NA	NA	NA	NA	NA		linc	linc|3P|XLOC_037914|TCONS_00153509:0.96179
AC034193.5		pseudogene	0.798	UP	NA	NA	NA	NA	NA	NA	NA	NA	NA	NA	NA	NA	NA	NA
AC074363.1		linc	3.55	UP	NA	NA	NA	NA	NA	NA	NA	NA	NA	NA	NA	NA	NA	NA		EnsCodingFull	EnsCodingFull|3P|XLOC_037866|TCONS_00153086:2.38938
AC104135.3		linc	0.149	UP	NA	NA	NA	NA	NA	NA	NA	NA	NA	NA	NA	NA	NA	NA		TooLow	TooLow|TCONS_00150110:0.0533402
AL022344.4		linc	1.1	UP	NA	NA	NA	NA	NA	NA	NA	NA	NA	NA	NA	NA	NA	NA		linc	linc|3P|XLOC_008354|TCONS_00035742:3.58603
AL109763.2		linc	0.114	UP	NA	NA	NA	NA	NA	NA	NA	NA	NA	NA	NA	NA	NA	NA
CTA-714B7.5		linc	2.703	UP	NA	NA	NA	NA	NA	NA	NA	NA	NA	NA	NA	NA	NA	NA		linc	linc|3P|XLOC_046661|TCONS_00184904:0.124901
CTC-338M12.9		linc	1.272	UP	NA	NA	NA	NA	NA	NA	NA	NA	NA	NA	NA	NA	NA	NA		linc	linc|3P|XLOC_056600|TCONS_00224310:0.167055
CTD-2152M20.2		antisense	0.223	UP	NA	NA	NA	NA	NA	NA	NA	NA	NA	NA	NA	NA	NA	NA
G002808		linc	0.324	UP	NA	NA	NA	NA	NA	NA	NA	NA	NA	NA	NA	NA	NA	NA
G005956		linc	1.106	UP	NA	NA	NA	NA	NA	NA	NA	NA	NA	NA	NA	NA	NA	NA		Repetitive	Repetitive|3P|XLOC_001572|TCONS_00010189:0.850899
G006538		other	0.057	UP	NA	NA	NA	NA	NA	NA	NA	NA	NA	NA	NA	NA	NA	NA
G007562		other	1.173	UP	NA	NA	NA	NA	NA	NA	NA	NA	NA	NA	NA	NA	NA	NA
G017278		lncrna	0.235	UP	NA	NA	NA	NA	NA	NA	NA	NA	NA	NA	NA	NA	NA	NA
G021139		pseudogene	0.171	UP	NA	NA	NA	NA	NA	NA	NA	NA	NA	NA	NA	NA	NA	NA		Repetitive	Repetitive|3P|XLOC_018675|TCONS_00077694:1.36023
G022348		linc	0.117	UP	NA	NA	NA	NA	NA	NA	NA	NA	NA	NA	NA	NA	NA	NA		TooLow	TooLow|TCONS_00079014:0.0545761
G027512		pseudogene	0.188	UP	NA	NA	NA	NA	NA	NA	NA	NA	NA	NA	NA	NA	NA	NA		linc	linc|3P|XLOC_024120|TCONS_00098091:0.768666
G031792		linc	0.389	UP	NA	NA	NA	NA	NA	NA	NA	NA	NA	NA	NA	NA	NA	NA
G033569		linc	4.288	UP	NA	NA	NA	NA	NA	NA	NA	NA	NA	NA	NA	NA	NA	NA
G033573		linc	1.288	UP	NA	NA	NA	NA	NA	NA	NA	NA	NA	NA	NA	NA	NA	NA
G059444		linc	0.044	UP	NA	NA	NA	NA	NA	NA	NA	NA	NA	NA	NA	NA	NA	NA
G076078		linc	0.425	UP	NA	NA	NA	NA	NA	NA	NA	NA	NA	NA	NA	NA	NA	NA
G076082		pseudogene	0.168	UP	NA	NA	NA	NA	NA	NA	NA	NA	NA	NA	NA	NA	NA	NA		Repetitive	Repetitive|3P|XLOC_065575|TCONS_00257811:2.9589
G040645		linc	0.248	UP	NA	NA	NA	NA	NA	NA	NA	NA	NA	NA	NA	NA	NA	NA
RP11-405F3.4		antisense	0.433	UP	NA	NA	NA	NA	NA	NA	NA	NA	NA	NA	NA	NA	NA	NA
G044612		lncrna	0.476	UP	NA	NA	NA	NA	NA	NA	NA	NA	NA	NA	NA	NA	NA	NA
G074945		pseudogene	0.058	UP	NA	NA	NA	NA	NA	NA	NA	NA	NA	NA	NA	NA	NA	NA
G047031		linc	0.434	UP	NA	NA	NA	NA	NA	NA	NA	NA	NA	NA	NA	NA	NA	NA
G048107		lncrna	0.429	UP	NA	NA	NA	NA	NA	NA	NA	NA	NA	NA	NA	NA	NA	NA
G051303		linc	0.153	UP	NA	NA	NA	NA	NA	NA	NA	NA	NA	NA	NA	NA	NA	NA		Repetitive	Repetitive|3P|XLOC_043844|TCONS_00175440:3.42735
G057185		linc	0.355	UP	NA	NA	NA	NA	NA	NA	NA	NA	NA	NA	NA	NA	NA	NA
AC008440.10		linc	0.124	UP	NA	NA	NA	NA	NA	NA	NA	NA	NA	NA	NA	NA	NA	NA
G067672		linc	0.306	UP	NA	NA	NA	NA	NA	NA	NA	NA	NA	NA	NA	NA	NA	NA
G069821		linc	0.263	UP	NA	NA	NA	NA	NA	NA	NA	NA	NA	NA	NA	NA	NA	NA
G070133		linc	1.239	UP	NA	NA	NA	NA	NA	NA	NA	NA	NA	NA	NA	NA	NA	NA		TooLow	TooLow|TCONS_00239685:0.0683312
G072652		linc	0.665	UP	NA	NA	NA	NA	NA	NA	NA	NA	NA	NA	NA	NA	NA	NA		Repetitive	Repetitive|3P|XLOC_060298|TCONS_00236887:0.285868
G073272		linc	2.272	UP	NA	NA	NA	NA	NA	NA	NA	NA	NA	NA	NA	NA	NA	NA		Repetitive	Repetitive|3P|XLOC_061521|TCONS_00244007:1.46212
G077326		pseudogene	0.883	UP	NA	NA	NA	NA	NA	NA	NA	NA	NA	NA	NA	NA	NA	NA		EnsCodingFragment	EnsCodingFragment|3P|XLOC_065836|TCONS_00259541:0.434485
G078709		linc	1.599	UP	NA	NA	NA	NA	NA	NA	NA	NA	NA	NA	NA	NA	NA	NA
G086629		linc	0.125	UP	NA	NA	NA	NA	NA	NA	NA	NA	NA	NA	NA	NA	NA	NA
G089162		linc	1.741	UP	NA	NA	NA	NA	NA	NA	NA	NA	NA	NA	NA	NA	NA	NA		Repetitive	Repetitive|3P|XLOC_076943|TCONS_00300497:1.20554
G090385		linc	0.304	UP	NA	NA	NA	NA	NA	NA	NA	NA	NA	NA	NA	NA	NA	NA		TooLow	TooLow|TCONS_00297594:0.630659
GS1-179L18.1		linc	1.279	UP	NA	NA	NA	NA	NA	NA	NA	NA	NA	NA	NA	NA	NA	NA		linc	linc|3P|XLOC_066609|TCONS_00264375:0.477177
G007706		lncrna	1.346	UP	NA	NA	NA	NA	NA	NA	NA	NA	NA	NA	NA	NA	NA	NA
G014523		lncrna	0.395	UP	NA	NA	NA	NA	NA	NA	NA	NA	NA	NA	NA	NA	NA	NA
G020221		linc	0.094	UP	NA	NA	NA	NA	NA	NA	NA	NA	NA	NA	NA	NA	NA	NA
G020513		lncrna	0.047	UP	NA	NA	NA	NA	NA	NA	NA	NA	NA	NA	NA	NA	NA	NA
G020935		pseudogene	1.158	UP	NA	NA	NA	NA	NA	NA	NA	NA	NA	NA	NA	NA	NA	NA		linc	linc|3P|XLOC_018637|TCONS_00077474:2.79723
G022349		linc	0.074	UP	NA	NA	NA	NA	NA	NA	NA	NA	NA	NA	NA	NA	NA	NA
G023437		linc	2.109	UP	NA	NA	NA	NA	NA	NA	NA	NA	NA	NA	NA	NA	NA	NA
G029145		linc	0.832	UP	NA	NA	NA	NA	NA	NA	NA	NA	NA	NA	NA	NA	NA	NA
G032959		linc	0.27	UP	NA	NA	NA	NA	NA	NA	NA	NA	NA	NA	NA	NA	NA	NA
G034415		linc	6.872	UP	NA	NA	NA	NA	NA	NA	NA	NA	NA	NA	NA	NA	NA	NA		linc	linc|3P|XLOC_028894|TCONS_00118230:1.1967
G035180		linc	1.072	UP	NA	NA	NA	NA	NA	NA	NA	NA	NA	NA	NA	NA	NA	NA
G035475		pseudogene	0.297	UP	NA	NA	NA	NA	NA	NA	NA	NA	NA	NA	NA	NA	NA	NA
RP11-1143G9.2		pseudogene	0.043	UP	NA	NA	NA	NA	NA	NA	NA	NA	NA	NA	NA	NA	NA	NA
G044325		pseudogene	0.127	UP	NA	NA	NA	NA	NA	NA	NA	NA	NA	NA	NA	NA	NA	NA		EnsCodingFull	EnsCodingFull|3P|XLOC_038910|TCONS_00160291:0.153537
RP11-159D12.2		linc	0.334	UP	NA	NA	NA	NA	NA	NA	NA	NA	NA	NA	NA	NA	NA	NA
G046200		linc	1.406	UP	NA	NA	NA	NA	NA	NA	NA	NA	NA	NA	NA	NA	NA	NA		Repetitive	Repetitive|3P|XLOC_037763|TCONS_00152532:0.383291
RP11-314O13.1		linc	0.688	UP	NA	NA	NA	NA	NA	NA	NA	NA	NA	NA	NA	NA	NA	NA		linc	linc|3P|XLOC_027116|TCONS_00113061:0.430192
RP11-344E13.3		antisense	0.454	UP	NA	NA	NA	NA	NA	NA	NA	NA	NA	NA	NA	NA	NA	NA		linc	linc|3P|XLOC_028623|TCONS_00116805:0.674313
RP11-347H15.1		pseudogene	0.802	UP	NA	NA	NA	NA	NA	NA	NA	NA	NA	NA	NA	NA	NA	NA		linc	linc|3P|XLOC_010981|TCONS_00043741:0.114148
RP11-434I12.2		antisense	0.137	UP	NA	NA	NA	NA	NA	NA	NA	NA	NA	NA	NA	NA	NA	NA
G060776		linc	0.328	UP	NA	NA	NA	NA	NA	NA	NA	NA	NA	NA	NA	NA	NA	NA
RP11-6N13.1		linc	1.406	UP	NA	NA	NA	NA	NA	NA	NA	NA	NA	NA	NA	NA	NA	NA		linc	linc|3P|XLOC_057151|TCONS_00227226:0.389188
RP11-758P17.3		antisense	0.16	UP	NA	NA	NA	NA	NA	NA	NA	NA	NA	NA	NA	NA	NA	NA
RP11-81H3.2		linc	0.278	UP	NA	NA	NA	NA	NA	NA	NA	NA	NA	NA	NA	NA	NA	NA
RP11-8L2.1		lncrna	0.072	UP	NA	NA	NA	NA	NA	NA	NA	NA	NA	NA	NA	NA	NA	NA
RP11-96H19.1		linc	0.217	UP	NA	NA	NA	NA	NA	NA	NA	NA	NA	NA	NA	NA	NA	NA
RP11-98G7.1		linc	0.13	UP	NA	NA	NA	NA	NA	NA	NA	NA	NA	NA	NA	NA	NA	NA
RP11-99J16__A.2		antisense	0.061	UP	NA	NA	NA	NA	NA	NA	NA	NA	NA	NA	NA	NA	NA	NA
RP4-724E16.2		antisense	0.462	DOWN	NA	NA	NA	NA	NA	NA	NA	NA	NA	NA	NA	NA	NA	NA
RP4-785G19.5		lncrna	0.433	UP	NA	NA	NA	NA	NA	NA	NA	NA	NA	NA	NA	NA	NA	NA
RP5-1139I1.1		linc	0.399	UP	NA	NA	NA	NA	NA	NA	NA	NA	NA	NA	NA	NA	NA	NA
RP5-991G20.1		antisense	0.243	UP	NA	NA	NA	NA	NA	NA	NA	NA	NA	NA	NA	NA	NA	NA
CTD-2247C11.1		linc	0.027	UP	NA	NA	NA	NA	NA	NA	NA	NA	NA	NA	NA	NA	NA	NA
AC068580.7		linc	0.152	UP	NA	NA	NA	NA	NA	NA	NA	NA	NA	NA	NA	NA	NA	NA		linc	linc|3P|XLOC_011801|TCONS_00049395:1.46206
AC079767.4		linc	0.086	UP	NA	NA	NA	NA	NA	NA	NA	NA	NA	NA	NA	NA	NA	NA
CTC-308K20.1		antisense	0.457	UP	NA	NA	NA	NA	NA	NA	NA	NA	NA	NA	NA	NA	NA	NA		linc	linc|3P|XLOC_057537|TCONS_00229655:0.342011
CTC-453G23.8		antisense	0.357	UP	NA	NA	NA	NA	NA	NA	NA	NA	NA	NA	NA	NA	NA	NA
RP1-167F1.2		antisense	0.23	UP	NA	NA	NA	NA	NA	NA	NA	NA	NA	NA	NA	NA	NA	NA
RP1-46F2.3		linc	0.225	UP	NA	NA	NA	NA	NA	NA	NA	NA	NA	NA	NA	NA	NA	NA		linc	linc|3P|XLOC_016308|TCONS_00072050:2.09137
RP1-90G24.10		antisense	1.13	UP	NA	NA	NA	NA	NA	NA	NA	NA	NA	NA	NA	NA	NA	NA		linc	linc|3P|XLOC_046236|TCONS_00182062:1.83087
G016562		linc	0.847	UP	NA	NA	NA	NA	NA	NA	NA	NA	NA	NA	NA	NA	NA	NA		linc	linc|3P|XLOC_015480|TCONS_00066005:1.61171
RP11-152P17.2		lncrna	8.944	UP	NA	NA	NA	NA	NA	NA	NA	NA	NA	NA	NA	NA	NA	NA		linc	linc|3P|XLOC_070809|TCONS_00279018:0.110917
G029464		linc	0.408	UP	NA	NA	NA	NA	NA	NA	NA	NA	NA	NA	NA	NA	NA	NA
RP11-187O7.3		linc	0.191	UP	NA	NA	NA	NA	NA	NA	NA	NA	NA	NA	NA	NA	NA	NA
G036099		lncrna	0.795	UP	NA	NA	NA	NA	NA	NA	NA	NA	NA	NA	NA	NA	NA	NA
G036193		lncrna	0.26	UP	NA	NA	NA	NA	NA	NA	NA	NA	NA	NA	NA	NA	NA	NA
G041531		linc	0.195	DOWN	NA	NA	NA	NA	NA	NA	NA	NA	NA	NA	NA	NA	NA	NA		linc	linc|3P|XLOC_035137|TCONS_00144895:0.863389
G042313		linc	0.049	UP	NA	NA	NA	NA	NA	NA	NA	NA	NA	NA	NA	NA	NA	NA
RP11-471M2.3		linc	0.156	UP	NA	NA	NA	NA	NA	NA	NA	NA	NA	NA	NA	NA	NA	NA		linc	linc|3P|XLOC_019003|TCONS_00079319:0.416864
G054112		linc	0.101	UP	NA	NA	NA	NA	NA	NA	NA	NA	NA	NA	NA	NA	NA	NA
G057470		linc	0.279	UP	NA	NA	NA	NA	NA	NA	NA	NA	NA	NA	NA	NA	NA	NA
G057894		linc	0.1	UP	NA	NA	NA	NA	NA	NA	NA	NA	NA	NA	NA	NA	NA	NA
G059058		lncrna	0.522	UP	NA	NA	NA	NA	NA	NA	NA	NA	NA	NA	NA	NA	NA	NA		linc	linc|3P|XLOC_048556|TCONS_00194176:0.202044
G061238		other	0.481	DOWN	NA	NA	NA	NA	NA	NA	NA	NA	NA	NA	NA	NA	NA	NA
G063409		other	14.029	DOWN	NA	NA	NA	NA	NA	NA	NA	NA	NA	NA	NA	NA	NA	NA		EnsCodingFull	EnsCodingFull|3P|XLOC_052405|TCONS_00209302:1.14017
G069044		linc	10.942	DOWN	NA	NA	NA	NA	NA	NA	NA	NA	NA	NA	NA	NA	NA	NA		linc	linc|3P|XLOC_057627|TCONS_00230394:0.424154
G072742		lncrna	0.442	UP	NA	NA	NA	NA	NA	NA	NA	NA	NA	NA	NA	NA	NA	NA		TooLow	TooLow|TCONS_00243342:0.0846801
G076224		linc	1.747	UP	NA	NA	NA	NA	NA	NA	NA	NA	NA	NA	NA	NA	NA	NA
G077204		other	0.319	UP	NA	NA	NA	NA	NA	NA	NA	NA	NA	NA	NA	NA	NA	NA
G079125		linc	1.362	UP	NA	NA	NA	NA	NA	NA	NA	NA	NA	NA	NA	NA	NA	NA		linc	linc|3P|XLOC_070152|TCONS_00275374:0.220958
G080639		pseudogene	0.031	UP	NA	NA	NA	NA	NA	NA	NA	NA	NA	NA	NA	NA	NA	NA
CTC-498J12.1		linc	0.641	UP	NA	NA	NA	NA	NA	NA	NA	NA	NA	NA	NA	NA	NA	NA
CTC-513N18.7		linc	19.921	DOWN	NA	NA	NA	NA	NA	NA	NA	NA	NA	NA	NA	NA	NA	NA		EnsCodingFull	EnsCodingFull|3P|XLOC_034711|TCONS_00142416:5.82271
CTC-548K16.1		linc	0.165	UP	NA	NA	NA	NA	NA	NA	NA	NA	NA	NA	NA	NA	NA	NA		linc	linc|3P|XLOC_033658|TCONS_00136278:0.275924
CTC-559E9.4		linc	33.313	DOWN	NA	NA	NA	NA	NA	NA	NA	NA	NA	NA	NA	NA	NA	NA		EnsCodingFull	EnsCodingFull|3P|XLOC_034700|TCONS_00142364:0.72007
CTD-2314G24.2		antisense	1.725	UP	NA	NA	NA	NA	NA	NA	NA	NA	NA	NA	NA	NA	NA	NA		linc	linc|3P|XLOC_056864|TCONS_00225655:0.863508
CTD-2521M24.9		linc	0.075	UP	NA	NA	NA	NA	NA	NA	NA	NA	NA	NA	NA	NA	NA	NA		EnsCodingFull	EnsCodingFull|3P|XLOC_033712|TCONS_00136545:0.168741
G003491		linc	1.039	UP	NA	NA	NA	NA	NA	NA	NA	NA	NA	NA	NA	NA	NA	NA
G009307		pseudogene	0.837	UP	NA	NA	NA	NA	NA	NA	NA	NA	NA	NA	NA	NA	NA	NA		EnsCodingFull	EnsCodingFull|3P|XLOC_008351|TCONS_00035694:0.147839
G013377		lncrna	0.261	UP	NA	NA	NA	NA	NA	NA	NA	NA	NA	NA	NA	NA	NA	NA
RP11-277B15.3		antisense	0.229	UP	NA	NA	NA	NA	NA	NA	NA	NA	NA	NA	NA	NA	NA	NA
G021356		lncrna	0.243	UP	NA	NA	NA	NA	NA	NA	NA	NA	NA	NA	NA	NA	NA	NA
RP11-332J15.3		linc	0.284	UP	NA	NA	NA	NA	NA	NA	NA	NA	NA	NA	NA	NA	NA	NA		linc	linc|3P|XLOC_055599|TCONS_00218320:0.124891
G032905		other	0.069	UP	NA	NA	NA	NA	NA	NA	NA	NA	NA	NA	NA	NA	NA	NA		EnsCodingFull	EnsCodingFull|3P|XLOC_029471|TCONS_00122526:0.195614
RP11-363E7.3		pseudogene	0.039	UP	NA	NA	NA	NA	NA	NA	NA	NA	NA	NA	NA	NA	NA	NA
RP11-390F4.6		linc	2.045	UP	NA	NA	NA	NA	NA	NA	NA	NA	NA	NA	NA	NA	NA	NA		EnsASCoding	EnsASCoding|3P|XLOC_072588|TCONS_00282493:1.85213
RP11-475N22.4		antisense	0.052	UP	NA	NA	NA	NA	NA	NA	NA	NA	NA	NA	NA	NA	NA	NA		linc	linc|3P|XLOC_048239|TCONS_00191920:0.216505
RP11-480I12.5		pseudogene	0.737	UP	NA	NA	NA	NA	NA	NA	NA	NA	NA	NA	NA	NA	NA	NA		linc	linc|3P|XLOC_003583|TCONS_00023558:1.34159
G044101		linc	0.163	UP	NA	NA	NA	NA	NA	NA	NA	NA	NA	NA	NA	NA	NA	NA
RP11-54D18.3		pseudogene	1.209	UP	NA	NA	NA	NA	NA	NA	NA	NA	NA	NA	NA	NA	NA	NA		EnsCodingFull	EnsCodingFull|3P|XLOC_073495|TCONS_00287667:0.32246
RP11-54O7.16		linc	0.718	UP	NA	NA	NA	NA	NA	NA	NA	NA	NA	NA	NA	NA	NA	NA		linc	linc|3P|XLOC_000020|TCONS_00000053:0.212801
RP11-564D11.3		pseudogene	1.092	UP	NA	NA	NA	NA	NA	NA	NA	NA	NA	NA	NA	NA	NA	NA		EnsCodingFragment	EnsCodingFragment|3P|XLOC_008001|TCONS_00033718:0.364085
RP11-725P16.2		linc	0.184	UP	NA	NA	NA	NA	NA	NA	NA	NA	NA	NA	NA	NA	NA	NA		linc	linc|3P|XLOC_039298|TCONS_00162297:0.401114
RP11-845M18.6		antisense	0.543	UP	NA	NA	NA	NA	NA	NA	NA	NA	NA	NA	NA	NA	NA	NA		EnsASCoding	EnsASCoding|3P|XLOC_015854|TCONS_00068919:2.19411
RP11-874J12.4		antisense	0.976	UP	NA	NA	NA	NA	NA	NA	NA	NA	NA	NA	NA	NA	NA	NA		EnsASCoding	EnsASCoding|3P|XLOC_031695|TCONS_00130122:0.473409
RP3-323P24.3		antisense	0.959	UP	NA	NA	NA	NA	NA	NA	NA	NA	NA	NA	NA	NA	NA	NA		Repetitive	Repetitive|3P|XLOC_076219|TCONS_00295759:3.67345
RP4-536B24.4		linc	0.31	UP	NA	NA	NA	NA	NA	NA	NA	NA	NA	NA	NA	NA	NA	NA		linc	linc|3P|XLOC_027202|TCONS_00113479:0.683198
RP4-680D5.2		antisense	0.46	UP	NA	NA	NA	NA	NA	NA	NA	NA	NA	NA	NA	NA	NA	NA		linc	linc|3P|XLOC_002232|TCONS_00014168:0.25191
RP4-798P15.3		lncrna	8.262	DOWN	NA	NA	NA	NA	NA	NA	NA	NA	NA	NA	NA	NA	NA	NA		EnsCodingFull	EnsCodingFull|3P|XLOC_003452|TCONS_00022887:0.131339
Z83844.1		antisense	0.42	UP	NA	NA	NA	NA	NA	NA	NA	NA	NA	NA	NA	NA	NA	NA		EnsASCoding	EnsASCoding|3P|XLOC_046703|TCONS_00185255:1.03436
RP11-1070N10.5		linc	0.485	UP	NA	NA	NA	NA	NA	NA	NA	NA	NA	NA	NA	NA	NA	NA		linc	linc|3P|XLOC_021056|TCONS_00085123:5.62341
RP11-115J23.1		linc	0.132	UP	NA	NA	NA	NA	NA	NA	NA	NA	NA	NA	NA	NA	NA	NA		Repetitive	Repetitive|3P|XLOC_010837|TCONS_00042833:0.164434
RP11-253M7.1		antisense	0.585	UP	NA	NA	NA	NA	NA	NA	NA	NA	NA	NA	NA	NA	NA	NA		linc	linc|3P|XLOC_024235|TCONS_00099096:21.2578
RP11-27K13.3		antisense	0.435	UP	NA	NA	NA	NA	NA	NA	NA	NA	NA	NA	NA	NA	NA	NA		EnsASCoding	EnsASCoding|3P|XLOC_003024|TCONS_00019838:0.729269
RP11-358D14.2		antisense	0.076	UP	NA	NA	NA	NA	NA	NA	NA	NA	NA	NA	NA	NA	NA	NA		linc	linc|3P|XLOC_043285|TCONS_00172325:1.26813
RP11-54A9.1		linc	13.305	DOWN	NA	NA	NA	NA	NA	NA	NA	NA	NA	NA	NA	NA	NA	NA		linc	linc|3P|XLOC_014993|TCONS_00062918:1.45252
G083502		other	0.679	UP	NA	NA	NA	NA	NA	NA	NA	NA	NA	NA	NA	NA	NA	NA
G027159	AMAT35	lncrna	0.106	UP	NA	NA	NA	NA	NA	NA	NA	NA	NA	NA	NA	NA	NA	NA
RP11-588H23.3	BRCAT402	antisense	0.244	UP	0	-1	0	-1	0	0	0	0	0	0	0	0	0	0		linc	linc|3P|XLOC_014968|TCONS_00062775:0.141563
G021137	BRCAT95	lncrna	0.358	UP	1	0	0	1	0	0	0	0	0	0	0	0	0	0
G080198	CAT1022	linc	2.452	UP	3	0	0	0	0	0	1	0	0	1	0	0	0	1
RP11-89K10.1	CAT1096	antisense	1.506	UP	0	-1	0	0	-1	0	0	0	0	0	0	0	0	0		linc	linc|3P|XLOC_069999|TCONS_00274528:2.11938
G084254	CAT1138	linc	2.695	UP	3	0	0	0	1	0	0	0	1	0	1	0	0	0		linc	linc|3P|XLOC_072668|TCONS_00282892:0.489736
RP11-435O5.2	CAT1168	linc	0.475	UP	1	-1	0	0	0	0	-1	0	0	0	0	1	0	0		Repetitive	Repetitive|3P|XLOC_073889|TCONS_00289849:0.430316
RP11-284F21.7	CAT122	antisense	3.201	UP	5	0	0	0	1	0	1	1	1	1	0	0	0	0		EnsASCoding	EnsASCoding|3P|XLOC_003267|TCONS_00021619:2.9538
RP11-124N14.3	CAT1235	antisense	7.352	DOWN	2	-4	0	-1	0	0	1	1	0	-1	-1	-1	0	0		EnsASCoding	EnsASCoding|3P|XLOC_008227|TCONS_00034989:63.3668
RP11-967K21.1	CAT1491	antisense	0.647	UP	0	-2	0	-1	0	0	0	0	0	0	0	0	0	-1		linc	linc|3P|XLOC_015689|TCONS_00067612:2.17758
RP11-438N16.1	CAT1572	linc	1.574	UP	2	0	0	0	0	0	0	0	0	0	1	0	1	0		linc	linc|3P|XLOC_016332|TCONS_00072267:0.752957
RP11-57A19.2	CAT1833	linc	0.528	UP	2	0	0	1	0	0	0	0	0	1	0	0	0	0		linc	linc|3P|XLOC_026727|TCONS_00110547:0.199152
AC009005.2	CAT2039	antisense	0.417	UP	3	0	0	1	0	0	0	0	0	1	0	1	0	0
AC104534.2	CAT2100	antisense	2.932	UP	1	-1	0	0	0	-1	1	0	0	0	0	0	0	0
CTD-2587H24.5	CAT2132	antisense	0.112	UP	2	-1	0	1	1	-1	0	0	0	0	0	0	0	0
AC074117.10	CAT219	antisense	1.447	UP	2	0	0	0	1	0	0	0	0	0	1	0	0	0		Repetitive	Repetitive|3P|XLOC_037034|TCONS_00148140:0.821829
RP11-191L9.4	CAT2260	linc	0.404	UP	4	0	0	1	1	0	0	0	0	0	1	1	0	0		linc	linc|3P|XLOC_046403|TCONS_00183229:1.00388
G044387	CAT266	linc	0.103	UP	3	0	0	0	1	0	0	0	1	0	1	0	0	0		Repetitive	Repetitive|3P|XLOC_037350|TCONS_00150202:1.26768
RP11-460N16.1	CAT421	linc	0.755	UP	0	-1	0	0	0	0	0	0	0	0	0	0	0	-1		linc	linc|3P|XLOC_047964|TCONS_00190374:0.691637
G002539	CAT57	linc	0.097	UP	0	-2	0	0	0	-1	0	0	0	0	0	0	0	-1		linc	linc|3P|XLOC_000694|TCONS_00004626:0.919619
G064032	CAT615	linc	0.048	UP	2	0	0	0	1	0	0	0	0	0	1	0	0	0
RP4-792G4.2	CAT62	antisense	0.178	UP	3	0	0	1	0	0	0	0	0	1	1	0	0	0		linc	linc|3P|XLOC_002709|TCONS_00017812:0.552828
CTD-2023M8.1	CAT647	linc	1.046	UP	5	0	0	0	1	0	1	0	0	1	1	1	0	0		linc	linc|3P|XLOC_056729|TCONS_00224911:0.321301
RP4-665J23.1	CAT76	linc	4.158	UP	1	-1	0	0	0	0	1	0	0	0	0	0	0	-1		linc	linc|3P|XLOC_002855|TCONS_00018627:1.96577
RP11-328M4.2	CAT800	antisense	0.287	UP	2	0	0	0	0	1	0	0	0	0	0	1	0	0		linc	linc|3P|XLOC_061060|TCONS_00241111:2.88854
AC004540.5	CAT915	linc	0.513	UP	2	-1	0	0	0	0	0	0	0	0	-1	1	0	1		linc	linc|3P|XLOC_065373|TCONS_00256611:0.326455
G083844	HNCAT103	linc	0.156	UP	1	0	0	0	1	0	0	0	0	0	0	0	0	0
G070362	HNCAT144	linc	0.058	UP	1	0	0	0	1	0	0	0	0	0	0	0	0	0
AC079135.1	HNCAT62	antisense	1.998	UP	1	0	0	0	1	0	0	0	0	0	0	0	0	0		EnsCodingFragment	EnsCodingFragment|3P|XLOC_038298|TCONS_00156264:0.322729
G027613	HNCAT80	lncrna	0.534	UP	1	0	0	0	1	0	0	0	0	0	0	0	0	0
RP5-884M6.1	HNCAT92	linc	0.62	UP	1	0	0	0	1	0	0	0	0	0	0	0	0	0		linc	linc|3P|XLOC_065867|TCONS_00259767:0.244029
G066515	KHCAT310	linc	0.727	UP	0	-1	0	0	0	-1	0	0	0	0	0	0	0	0		linc	linc|3P|XLOC_057050|TCONS_00226731:0.942983
G025723	KHCAT61	linc	0.095	UP	1	0	0	0	0	1	0	0	0	0	0	0	0	0		linc	linc|3P|XLOC_020998|TCONS_00084767:1.15416
G081126	LACAT105	linc	0.116	UP	1	0	0	0	0	0	0	0	0	1	0	0	0	0		linc	linc|3P|XLOC_070555|TCONS_00277498:0.70018
RP11-159H10.3	LACAT125	antisense	1.133	UP	1	0	0	0	0	0	0	0	0	1	0	0	0	0		EnsASCoding	EnsASCoding|3P|XLOC_069702|TCONS_00273071:1.22297
RP11-89K21.1	LACAT16	linc	0.248	UP	1	0	0	0	0	0	0	0	0	1	0	0	0	0		linc	linc|3P|XLOC_038694|TCONS_00158833:0.149229
G059899	LACAT179	lncrna	0.349	UP	0	-1	0	0	0	0	0	0	0	-1	0	0	0	0
RP11-453F18__B.1	LSCAT182	linc	0.428	UP	1	0	0	0	0	0	0	0	0	0	1	0	0	0		linc	linc|3P|XLOC_077100|TCONS_00301395:0.137017
RP11-268G12.1	LVCAT16	linc	1.107	UP	1	0	0	0	0	0	0	0	1	0	0	0	0	0		linc	linc|3P|XLOC_076730|TCONS_00298969:0.144658
G006010	LVCAT2	lncrna	0.321	UP	1	0	0	0	0	0	0	0	1	0	0	0	0	0
RP11-328J2.1	LVCAT5	linc	1.784	UP	1	0	0	0	0	0	0	0	1	0	0	0	0	0		TooLow	TooLow|TCONS_00266679:0.031514
G007808	OVAT104	lncrna	0.302	UP	NA	NA	NA	NA	NA	NA	NA	NA	NA	NA	NA	NA	NA	NA
RP11-608O21.1	OVAT177	linc	0.726	UP	NA	NA	NA	NA	NA	NA	NA	NA	NA	NA	NA	NA	NA	NA		linc	linc|3P|XLOC_051767|TCONS_00205735:2.31326
G039931	OVAT223	lncrna	0.259	UP	NA	NA	NA	NA	NA	NA	NA	NA	NA	NA	NA	NA	NA	NA		Repetitive	Repetitive|3P|XLOC_033810|TCONS_00137030:5.39765
RP11-3J1.1	OVAT32	linc	0.047	UP	NA	NA	NA	NA	NA	NA	NA	NA	NA	NA	NA	NA	NA	NA		linc	linc|3P|XLOC_052769|TCONS_00211292:0.106023
AC074389.9	PRCAT11	linc	0.121	UP	1	0	0	0	0	0	0	0	0	0	0	1	0	0		linc	linc|3P|XLOC_066280|TCONS_00262282:0.717577
RP4-625H18.2	PRCAT261	linc	0.978	UP	0	-1	0	0	0	0	0	0	0	0	0	-1	0	0		linc	linc|3P|XLOC_060768|TCONS_00239278:0.22243
RP11-108M9.4	PRCAT293	linc	2.365	DOWN	0	-1	0	0	0	0	0	0	0	0	0	-1	0	0		linc	linc|3P|XLOC_002262|TCONS_00014379:0.148856
G024946	PRCAT64	linc	0.097	UP	1	0	0	0	0	0	0	0	0	0	0	1	0	0
RP11-166D19.1	THCAT13	lncrna	33.321	DOWN	1	0	0	0	0	0	0	0	0	0	0	0	0	1

## Sheet: CORE
Supplementary table 10 B
CORE - this provides a list of lncRNAs that are differentially expressed between cell lines and primary cells in FANTOM5 and at least two cancer types (in the same direction) in the miTranscriptome, our in-house TCGA analysis or in Cabanski et al.
miTranscriptome
func_name (miTr)	gene_name	lncRNA type	mean_tpm	FANTOM5 Pan-Cancer DE	miTr_UP	miTr_DOWN	qPCR validation	Alternative name
CAT647	CTD-2023M8.1	linc	1.046	UP	5	0
CAT122	RP11-284F21.7	antisense	3.201	UP	5	0	cell lines + cDNA tumor panel	ENST00000448869
CAT2260	RP11-191L9.4	linc	0.404	UP	4	0
MNX1-AS1	MNX1-AS1	antisense	0.198	UP	4	0
CAT1138	G084254	linc	2.695	UP	3	0
CAT266	G044387	linc	0.103	UP	3	0
CAT62	RP4-792G4.2	antisense	0.178	UP	3	0
LINC00898	LINC00898	linc	0.104	UP	3	0
DGCR5	DGCR5	antisense	3.738	UP	3	0
CAT2039	AC009005.2	antisense	0.417	UP	3	0
CAT1022	G080198	linc	2.452	UP	3	0
CAT1167	PCAT7	antisense	0.086	UP	2	0	cell lines
FEZF1-AS1	FEZF1-AS1	antisense	0.958	UP	2	0
CAT1572	RP11-438N16.1	linc	1.574	UP	2	0
DLX6-AS1	DLX6-AS2	antisense	0.259	UP	2	0
CAT1833	RP11-57A19.2	linc	0.528	UP	2	0
CAT615	G064032	linc	0.048	UP	2	0
LINC00669	LINC00669	linc	4.096	UP	2	0
CAT800	RP11-328M4.2	antisense	0.287	UP	2	0	cell lines + cDNA tumor panel	FOXP4-AS1
MFI2-AS1	MFI2-AS1	antisense	1.301	UP	2	0
CAT219	AC074117.10	antisense	1.447	UP	2	0
CAT1235	RP11-124N14.3	antisense	7.352	DOWN	2	-4	cell lines
MEG3	MEG3	linc	182.23	DOWN	0	-2
TCGA in house analysis
	gene_name	lncRNA type	mean_tpm	FANTOM5 Pan-Cancer DE	TCGA_UP	TCGA_DOWN
	DGCR5	antisense	3.738	UP	6	-2
	MEG3	linc	182.23	DOWN	0	-6
	MT1L	pseudogene	116.644	DOWN	0	-9
	PVT1	lncrna	0.407	UP	9	0
Cabanski
	gene_name	lncRNA type	mean_tpm	FANTOM5 Pan-Cancer DE	Cabanski UP	Cabanski DOWN
	LINC00511	linc	0.256	UP	3
	RP11-438N16.1	linc	1.574	UP	3	0
	AC006262.5	linc	0.223	UP	2	0
	RP11-435O5.2	linc	0.475	UP	2	0

## Sheet: F5&miTranscriptome
Supplementary table 10 C
F5&miTranscriptome - this provides a list of 63 lncRNAs that are differentially expressed in primary cells (FANTOM5) and in miTranscriptome
							Differential expression in miTranscriptome analysis (TCGA tumors)
gene_name	func_name (miTr)	lncRNA type	mean_tpm	FANTOM5 Pan-Cancer DE	miTr_UP	miTr_DOWN	bladder	breast	head_neck	kich	kirc	kirp	liver	luad	lusc	prostate	stomach	thyroid	description	gene_type_plar	transcript_id_plar
G021137	BRCAT95	lncrna	0.358	UP	1	0	0	1	0	0	0	0	0	0	0	0	0	0
G084254	CAT1138	linc	2.695	UP	3	0	0	0	1	0	0	0	1	0	1	0	0	0		linc	linc|3P|XLOC_072668|TCONS_00282892:0.489736
PCAT7	CAT1167	antisense	0.086	UP	2	0	0	0	1	0	0	0	0	0	0	1	0	0	prostate cancer associated transcript 7 (non-protein coding)	EnsASCoding	EnsASCoding|3P|XLOC_073002|TCONS_00284422:0.112483
RP11-191L9.4	CAT2260	linc	0.404	UP	4	0	0	1	1	0	0	0	0	0	1	1	0	0		linc	linc|3P|XLOC_046403|TCONS_00183229:1.00388
G044387	CAT266	linc	0.103	UP	3	0	0	0	1	0	0	0	1	0	1	0	0	0		Repetitive	Repetitive|3P|XLOC_037350|TCONS_00150202:1.26768
AC104534.2	CAT2100	antisense	2.932	UP	1	-1	0	0	0	-1	1	0	0	0	0	0	0	0
RP5-884M6.1	HNCAT92	linc	0.62	UP	1	0	0	0	1	0	0	0	0	0	0	0	0	0		linc	linc|3P|XLOC_065867|TCONS_00259767:0.244029
RP11-328J2.1	LVCAT5	linc	1.784	UP	1	0	0	0	0	0	0	0	1	0	0	0	0	0		TooLow	TooLow|TCONS_00266679:0.031514
RP11-268G12.1	LVCAT16	linc	1.107	UP	1	0	0	0	0	0	0	0	1	0	0	0	0	0		linc	linc|3P|XLOC_076730|TCONS_00298969:0.144658
RP11-460N16.1	CAT421	linc	0.755	UP	0	-1	0	0	0	0	0	0	0	0	0	0	0	-1		linc	linc|3P|XLOC_047964|TCONS_00190374:0.691637
G083844	HNCAT103	linc	0.156	UP	1	0	0	0	1	0	0	0	0	0	0	0	0	0
MNX1-AS1	MNX1-AS1	antisense	0.198	UP	4	0	0	1	0	0	0	0	0	1	1	1	0	0	MNX1 antisense RNA 1 (head to head)	linc	linc|3P|XLOC_066224|TCONS_00262010:2.83731
G059899	LACAT179	lncrna	0.349	UP	0	-1	0	0	0	0	0	0	0	-1	0	0	0	0
CTD-2023M8.1	CAT647	linc	1.046	UP	5	0	0	0	1	0	1	0	0	1	1	1	0	0		linc	linc|3P|XLOC_056729|TCONS_00224911:0.321301
FEZF1-AS1	FEZF1-AS1	antisense	0.958	UP	2	0	0	0	0	0	0	0	0	1	1	0	0	0	FEZF1 antisense RNA 1	linc	linc|3P|XLOC_065937|TCONS_00260280:0.104611
G024946	PRCAT64	linc	0.097	UP	1	0	0	0	0	0	0	0	0	0	0	1	0	0
AC074389.9	PRCAT11	linc	0.121	UP	1	0	0	0	0	0	0	0	0	0	0	1	0	0		linc	linc|3P|XLOC_066280|TCONS_00262282:0.717577
LINC00494	LINC00494	linc	0.379	UP	1	0	0	0	0	0	0	1	0	0	0	0	0	0	long intergenic non-protein coding RNA 494	linc	linc|3P|XLOC_043124|TCONS_00171500:0.698543
RP11-159H10.3	LACAT125	antisense	1.133	UP	1	0	0	0	0	0	0	0	0	1	0	0	0	0		EnsASCoding	EnsASCoding|3P|XLOC_069702|TCONS_00273071:1.22297
RP11-588H23.3	BRCAT402	antisense	0.244	UP	0	-1	0	-1	0	0	0	0	0	0	0	0	0	0		linc	linc|3P|XLOC_014968|TCONS_00062775:0.141563
RP11-438N16.1	CAT1572	linc	1.574	UP	2	0	0	0	0	0	0	0	0	0	1	0	1	0		linc	linc|3P|XLOC_016332|TCONS_00072267:0.752957
DLX6-AS2	DLX6-AS1	antisense	0.259	UP	2	0	0	0	0	0	0	0	0	1	1	0	0	0	DLX6 antisense RNA 2
RP4-792G4.2	CAT62	antisense	0.178	UP	3	0	0	1	0	0	0	0	0	1	1	0	0	0		linc	linc|3P|XLOC_002709|TCONS_00017812:0.552828
G027613	HNCAT80	lncrna	0.534	UP	1	0	0	0	1	0	0	0	0	0	0	0	0	0
RP11-57A19.2	CAT1833	linc	0.528	UP	2	0	0	1	0	0	0	0	0	1	0	0	0	0		linc	linc|3P|XLOC_026727|TCONS_00110547:0.199152
G064032	CAT615	linc	0.048	UP	2	0	0	0	1	0	0	0	0	0	1	0	0	0
AC079135.1	HNCAT62	antisense	1.998	UP	1	0	0	0	1	0	0	0	0	0	0	0	0	0		EnsCodingFragment	EnsCodingFragment|3P|XLOC_038298|TCONS_00156264:0.322729
LINC00898	LINC00898	linc	0.104	UP	3	0	0	0	1	0	0	0	0	0	1	1	0	0	long intergenic non-protein coding RNA 898	linc	linc|3P|XLOC_046828|TCONS_00186160:0.624417
G081126	LACAT105	linc	0.116	UP	1	0	0	0	0	0	0	0	0	1	0	0	0	0		linc	linc|3P|XLOC_070555|TCONS_00277498:0.70018
RP11-284F21.7	CAT122	antisense	3.201	UP	5	0	0	0	1	0	1	1	1	1	0	0	0	0		EnsASCoding	EnsASCoding|3P|XLOC_003267|TCONS_00021619:2.9538
RP11-453F18__B.1	LSCAT182	linc	0.428	UP	1	0	0	0	0	0	0	0	0	0	1	0	0	0		linc	linc|3P|XLOC_077100|TCONS_00301395:0.137017
G070362	HNCAT144	linc	0.058	UP	1	0	0	0	1	0	0	0	0	0	0	0	0	0
G025723	KHCAT61	linc	0.095	UP	1	0	0	0	0	1	0	0	0	0	0	0	0	0		linc	linc|3P|XLOC_020998|TCONS_00084767:1.15416
RP4-625H18.2	PRCAT261	linc	0.978	UP	0	-1	0	0	0	0	0	0	0	0	0	-1	0	0		linc	linc|3P|XLOC_060768|TCONS_00239278:0.22243
LINC00669	LINC00669	linc	4.096	UP	2	0	0	0	0	0	0	0	0	1	1	0	0	0	long intergenic non-protein coding RNA 669	Repetitive	Repetitive|3P|XLOC_032328|TCONS_00133171:11.0491
RNU5D-1	THCAT430	small ncRNAs	0.09	UP	0	-1	0	0	0	0	0	0	0	0	0	0	0	-1	RNA, U5D small nuclear 1
MCF2L-AS1	MCF2L-AS1	antisense	1.474	UP	2	-1	0	0	0	1	-1	0	0	0	0	1	0	0	MCF2L antisense RNA 1	EnsASCoding	EnsASCoding|3P|XLOC_019135|TCONS_00079895:1.07366
RP11-328M4.2	CAT800	antisense	0.287	UP	2	0	0	0	0	1	0	0	0	0	0	1	0	0		linc	linc|3P|XLOC_061060|TCONS_00241111:2.88854
G066515	KHCAT310	linc	0.727	UP	0	-1	0	0	0	-1	0	0	0	0	0	0	0	0		linc	linc|3P|XLOC_057050|TCONS_00226731:0.942983
G006010	LVCAT2	lncrna	0.321	UP	1	0	0	0	0	0	0	0	1	0	0	0	0	0
RP11-89K21.1	LACAT16	linc	0.248	UP	1	0	0	0	0	0	0	0	0	1	0	0	0	0		linc	linc|3P|XLOC_038694|TCONS_00158833:0.149229
RP11-89K10.1	CAT1096	antisense	1.506	UP	0	-1	0	0	-1	0	0	0	0	0	0	0	0	0		linc	linc|3P|XLOC_069999|TCONS_00274528:2.11938
RP4-665J23.1	CAT76	linc	4.158	UP	1	-1	0	0	0	0	1	0	0	0	0	0	0	-1		linc	linc|3P|XLOC_002855|TCONS_00018627:1.96577
DGCR5	DGCR5	antisense	3.738	UP	3	0	0	0	0	0	1	1	0	1	0	0	0	0	DiGeorge syndrome critical region gene 5 (non-protein coding)	linc	linc|3P|XLOC_046030|TCONS_00180666:1.27408
LINC00839	LINC00839	linc	2.32	UP	0	-1	0	0	0	0	0	-1	0	0	0	0	0	0	long intergenic non-protein coding RNA 839	EnsCodingFragment	EnsCodingFragment|3P|XLOC_007429|TCONS_00030471:2.87924
AC009005.2	CAT2039	antisense	0.417	UP	3	0	0	1	0	0	0	0	0	1	0	1	0	0
AC004540.5	CAT915	linc	0.513	UP	2	-1	0	0	0	0	0	0	0	0	-1	1	0	1		linc	linc|3P|XLOC_065373|TCONS_00256611:0.326455
MFI2-AS1	MFI2-AS1	antisense	1.301	UP	2	0	0	1	0	0	0	0	0	0	1	0	0	0	MFI2 antisense RNA 1	linc	linc|3P|XLOC_048660|TCONS_00194733:3.92114
G080198	CAT1022	linc	2.452	UP	3	0	0	0	0	0	1	0	0	1	0	0	0	1
AC074117.10	CAT219	antisense	1.447	UP	2	0	0	0	1	0	0	0	0	0	1	0	0	0		Repetitive	Repetitive|3P|XLOC_037034|TCONS_00148140:0.821829
RP11-435O5.2	CAT1168	linc	0.475	UP	1	-1	0	0	0	0	-1	0	0	0	0	1	0	0		Repetitive	Repetitive|3P|XLOC_073889|TCONS_00289849:0.430316
LINC00662	LINC00662	linc	1.083	UP	0	-1	0	0	0	0	0	0	0	0	0	0	0	-1	long intergenic non-protein coding RNA 662	linc	linc|3P|XLOC_034755|TCONS_00142644:7.06082
LINC01058	LINC01058	linc	0.497	UP	0	-4	0	-1	0	-1	0	0	0	0	0	-1	0	-1	long intergenic non-protein coding RNA 1058	linc	linc|3P|XLOC_018730|TCONS_00077939:1.10543
RP11-967K21.1	CAT1491	antisense	0.647	UP	0	-2	0	-1	0	0	0	0	0	0	0	0	0	-1		linc	linc|3P|XLOC_015689|TCONS_00067612:2.17758
HOXA11-AS	HOXA11-AS	antisense	0.431	UP	2	-1	0	0	1	0	-1	0	0	0	1	0	0	0	HOXA11 antisense RNA
G002539	CAT57	linc	0.097	UP	0	-2	0	0	0	-1	0	0	0	0	0	0	0	-1		linc	linc|3P|XLOC_000694|TCONS_00004626:0.919619
RP11-108M9.4	PRCAT293	linc	2.365	DOWN	0	-1	0	0	0	0	0	0	0	0	0	-1	0	0		linc	linc|3P|XLOC_002262|TCONS_00014379:0.148856
ZNF667-AS1	ZNF667-AS1	linc	18.14	DOWN	0	-1	0	0	0	0	-1	0	0	0	0	0	0	0	ZNF667 antisense RNA 1 (head to head)	Repetitive	Repetitive|3P|XLOC_034301|TCONS_00140041:9.97639
SNHG18	SNHG18	linc	17.041	DOWN	0	-1	0	0	0	0	0	0	0	0	0	-1	0	0	small nucleolar RNA host gene 18 (non-protein coding)
RP11-166D19.1	THCAT13	lncrna	33.321	DOWN	1	0	0	0	0	0	0	0	0	0	0	0	0	1
RP11-124N14.3	CAT1235	antisense	7.352	DOWN	2	-4	0	-1	0	0	1	1	0	-1	-1	-1	0	0		EnsASCoding	EnsASCoding|3P|XLOC_008227|TCONS_00034989:63.3668
CTD-2587H24.5	CAT2132	antisense	0.112	UP	2	-1	0	1	1	-1	0	0	0	0	0	0	0	0
MEG3	MEG3	linc	182.23	DOWN	0	-2	-1	-1	0	0	0	0	0	0	0	0	0	0	maternally expressed 3 (non-protein coding)	EnsCodingFull	EnsCodingFull|3P|XLOC_021113|TCONS_00085441:6.46736

## Sheet: F5 TCGA, Cabanski
Supplementary table 10D
The table shows gene level overlap between differentially expressed lncRNAs from FANTOM5 analysis and TCGA in-house analysis and TCGA analysis by Cabanski at al.
TCGA_UP - number of TCGA tumor types in which given gene is up-regulated
TCGA_DOWN - number of TCGA tumor types in which given gene is up-regulated
Cabanski UP - number of TCGA tumor types in which given gene is up-regulated. As reported by: Cabanski, C. R., White, N. M., Dang, H. X., Silva-Fisher, J. M., Rauck, C. E., Cicka, D., & Maher, C. A. (2015). Pan-cancer transcriptome analysis reveals long noncoding RNAs with conserved function. RNA Biology, 0. doi:10.1080/15476286.2015.1038012
Cabanski DOWN - number of TCGA tumor types in which given gene is down-regulated. As reported by: Cabanski, C. R., White, N. M., Dang, H. X., Silva-Fisher, J. M., Rauck, C. E., Cicka, D., & Maher, C. A. (2015). Pan-cancer transcriptome analysis reveals long noncoding RNAs with conserved function. RNA Biology, 0. doi:10.1080/15476286.2015.1038012
genes marked in bold - are also differentially expressed in miTranscriptome study
						Differential expression in TCGA tumor types (In house analysis)
gene_name	lncRNA type	mean_tpm	FANTOM5 Pan-Cancer DE	TCGA_UP	TCGA_DOWN	BLCA	BRCA	COAD	HNSC	KICH	KIRC	KIRP	LIHC	LUAD	LUSC	PRAD	READ	THCA	UCEC
DGCR5	antisense	3.738	UP	6	-2	1	0	0	0	-1	1	1	-1	1	1	0	0	0	1
MEG3	linc	182.23	DOWN	0	-6	-1	-1	0	0	-1	0	-1	0	0	0	-1	0	0	-1
MT1L	pseudogene	116.644	DOWN	0	-9	-1	-1	-1	0	0	0	-1	-1	0	-1	-1	-1	-1	0
PVT1	lncrna	0.407	UP	9	0	1	1	1	0	0	1	1	1	1	1	0	1	0	0
						Differentiall expression in TCGA tumor types (Cabanski et al.)
gene_name	lncRNA type	mean_tpm	FANTOM5 Pan-Cancer DE	Cabanski UP	Cabanski DOWN	BLCA	BRCA	CRC	HNSC	KIRC	LUAD	LUSC	UCEC
LINC00511	linc	0.256	UP	3	0	0	1	3	0	0	1	1	0
SNHG18	linc	17.041	DOWN	0	1	0	0	3	0	-2	0	0	0
RP11-438N16.1	linc	1.574	UP	3	0	0	0	1	1	0	0	1	0
AC006262.5	linc	0.223	UP	2	0	1	3	0	0	3	3	1	0
RP11-435O5.2	linc	0.475	UP	2	0	0	0	1	0	0	0	1	0
						Legend Cabanski: For each cancer, 1 = up-regulated, 2 = up-regulated and outlier, 3 = outlier, -1 = down-regulated, -2 = down-regulated and outlier, 0 = not significant.
gene_name	lncRNA type	mean_tpm	FANTOM5 Pan-Cancer DE	TCGA_UP	TCGA_DOWN
MEG3	linc	182.23	DOWN	0	-6
PVT1	lncrna	0.407	UP	9	0
gene_name	lncRNA type	mean_tpm	FANTOM5 Pan-Cancer DE	Cabanski UP	Cabanski DOWN
LINC00511	linc	0.256	UP	3
RP11-438N16.1	linc	1.574	UP	3	0
AC006262.5	linc	0.223	UP	2	0
RP11-435O5.2	linc	0.475	UP	2	0
