# Supplementary material for: Transcriptome Analysis of Recurrently Deregulated Genes across Multiple Cancers Identifies New Pan-Cancer Biomarkers
Source: Oxford University Press journal article supplement (doi:10.1158/0008-5472.can-15-0484), 2015-11-09
Supplement: 00085472can150484-sup-145596_2_supp_3145148_n2pkmp.xlsx [file 00085472can150484-sup-145596_2_supp_3145148_n2pkmp.xlsx]

## Sheet: Readme
Readme for Supplementary table11
This supplement contains a summary of the enhancerRNAs detected as differentially expressed in the FANTOM5 analysis and are associated with RNA transcript from miTranscriptome
11A -23 enhancerRNAs genes detected as recurrently up regulated across multiple cancer cell lines compared to primary cells and the information about associated miTranscriptome transcripts.
11B - this provides a list of enhancerRNAs that are up-regulated in primary cells (FANTOM5) and in least one cancer type in miTranscriptome study
enhancer - enhancer name from Andersson et al. 2014
log2FC cancer vs normal - log2 fold change from differential expression in matched solid cancer comparison
FANTOM5 DE Summary - FANTOM5 differential expression summary based on CAGE profiling in cancer cell lines
miTr_UP - number of TCGA tumor types in which given gene is up-regulated, as reported in miTransciptome study Iyer, M. K., Niknafs, Y. S., Malik, R., Singhal, U., Sahu, A., Hosono, Y., et al. (2015). The landscape of long noncoding RNAs in the human transcriptome. Nat Genet. doi:10.1038/ng.3192
miTr_UP - number of TCGA tumor types in which given gene is down-regulated, as reported in miTransciptome study Iyer, M. K., Niknafs, Y. S., Malik, R., Singhal, U., Sahu, A., Hosono, Y., et al. (2015). The landscape of long noncoding RNAs in the human transcriptome. Nat Genet. doi:10.1038/ng.3192
Differential expression in miTranscriptome analysis (TCGA tumors) - information in which tumor types given lncRNA was up regulated (1) or downregulated (-1). 0 - not differentially expressed

## Sheet: 11A
Supplementary table 11A - 23 enhancerRNAs genes detected as recurrently up regulated across multiple cancer cell lines compared to primary cells and the information about associated miTranscriptome transcripts.
			Information about associated trascript (miTranscriptome)
enhancer	log2FC cancer vs normal	FANTOM5 DE Summary	transcript_id	gene_id	func_name_final
chr1:242108255-242108348	5.89786	Solid_ON	T034020	G007731	CAT193
chr1:89358212-89358439	4.90173	Solid_ON	T014669	G003213	PRCAT34
chr15:41254301-41254691	5.30808	Pan_ON	T114951	G027159	AMAT35	Blood Lineage association
chr16:72459158-72459630	3.24947	Pan_UP	T135932	G031794	CAT1871	Brain / Glioblastoma Lineage association
chr6:27759985-27760333	5.06568	Pan_UP	T299629	G070055	KCCAT247
chr8:125302460-125302812	4.7848	Solid_ON	T350762	G082814	KHCAT236
chr1:27383957-27384315	4.32923	Solid_ON	T006300	G001323	NA
chr10:70735854-70735920	4.93927	Solid_ON	T043183	G009973	NA
chr12:20975224-20975562	7.00052	Solid_ON	T075004	G017282	NA
chr13:24528296-24528692	4.97802	Solid_ON	T091542	G021144	NA
chr13:64652316-64652644	7.82757	Pan_ON	T095573	G022349	NA
chr16:85586399-85586765	3.91272	Pan_ON	T137431	G032191	NA
chr16:89579992-89580270	3.335	Solid_ON	T138659	G032438	NA
chr17:25416172-25416581	10.3587	Pan_UP Pan_ON	T144269	G033573	NA
chr2:10260365-10260994	2.23913	Pan_UP	T184380	G042350	NA
chr20:50383575-50384083	4.64777	Solid_UP	T219975	G050858	NA
chr20:61506279-61506510	4.77517	Pan_ON	T222085	G051329	NA
chr21:17276028-17276063	4.70112	Solid_ON	T223674	G051606	NA
chr4:41936193-41936441	4.75593	Solid_ON	T263979	G060850	NA
chr5:154062607-154063000	5.15831	Pan_ON	T291868	G068231	NA
chr6:26266741-26266990	3.87433	Solid_ON	T299198	G069947	NA
chr7:23510676-23511223	4.55763	Pan_UP	T319964	G074942	NA
chr7:57639323-57639702	8.77108	Solid_ON	T324852	G076082	NA

## Sheet: 11B
Supplementary table 11B - this provides a list of enhancerRNAs that are up-regulated in primary cells (FANTOM5) and up-regualted in least one cancer type in miTranscriptome study
			Information about associated trascript (miTRanscriptome)					Differential expression in miTranscriptome analysis (TCGA tumors)
enhancer	log2FC cancer vs normal	FANTOM5 DE Summary	transcript_id	gene_id	func_name_final	miTr_UP	miTr_DOWN	bladder	breast	head_neck	kich	kirc	kirp	liver	luad	lusc	prostate	stomach	thyroid
chr1:242108255-242108348	5.89786	Solid_ON	T034020	G007731	CAT193	2	0	0	1	0	0	0	0	0	1	0	0	0	0
chr6:27759985-27760333	5.06568	Pan_UP	T299629	G070055	KCCAT247	1	0	0	0	0	0	1	0	0	0	0	0	0	0
chr8:125302460-125302812	4.7848	Solid_ON	T350762	G082814	KHCAT236	1	0	0	0	0	1	0	0	0	0	0	0	0	0
chr1:89358212-89358439	4.90173	Solid_ON	T014669	G003213	PRCAT34	1	0	0	0	0	0	0	0	0	0	0	1	0	0

## Sheet: 11C
Supplementary table 11C The expression of AMAT35 and CAT1871 in miTranscriptome analysis.
			AMAT35							CAT1871
