# Supplementary material for: Transcriptome Analysis of Recurrently Deregulated Genes across Multiple Cancers Identifies New Pan-Cancer Biomarkers
Source: Oxford University Press journal article supplement (doi:10.1158/0008-5472.can-15-0484), 2015-11-09
Supplement: 00085472can150484-sup-145596_2_supp_3145149_n1pkmq.xlsx [file 00085472can150484-sup-145596_2_supp_3145149_n1pkmq.xlsx]

## Sheet: Sheet1
Supplementary table 12: Primers used for the qRTPCR validations
Target	Comment	Left	Right	Product size [bp]	Annealing Temperature [oC]
CCDC144NL*	protein coding	GGAGGACTAGAAGGAAGAGGC	ATCTCCACCACCAACTGCAT	233	55
RP11-344E13.3*	lncRNA	TGCCCAACGTAGAGGACTAG	GTCTCAGGTGGTAGAGGTGG	231 (489)	55
AC007050.1	lncRNA	CTCCCTCACTCTGGCCTAAG	CATTACAGCCACCAATCGCA	227	55
CTC-338M12.9	lncRNA	CAACAGAGATGGCAGTGTGG	TTGAGCTGCAGTCTCCATCA	241	55
BAGE2	pseudogene	GAGGTTGGAGCCTGAAGATG	AGTTTGCATCTTCCTTCGATCT	211	55
PCAT7	lncRNA	GGAACAGAGGCAGGACAAAT	TTCCTGCTTGCTGTGTTACT	316	55
SMPD4P1	lncRNA	CCATCTGGGTCGGAAAGATAAA	GGTGAGGGAACGCCATAAA	240	55
RP11-124N14.3	antisense to VIM (EMT marker)	CTCCGGTACTCAGTGGACTC	TGCAGGCTCAGATTCAGGAA	187	55
MAGI2-AS3	antisense to MAGI2	CAGTGCGGACCTTTCTTCAG	CTCCCCTCTCTTGGATGCAA	203	55
MT1L	pseudogene	TCTCCCGTCATTTCTTGGCT	TTTACATCTGGGAGCAGGGC	240	55
BLM	PC,tumor suppressor	TGCTCAGGAAAGTGACTCTCT	TGTCAGAGGTGTCAAGGTCC	236	53
PRAME	PC, cancer antigen	GGAGACCTTCAAAGCTGTGC	GCCTCTGTGCTCAAACCATC	222	53
ENST00000448869	lncRNA	ACAGGGCAGTATTCCAGCTT	CCCCAACGACTCAGGTATCT	164	53
FIRRE	lncRNA	ACCTCGCTTCACTTCTCCAT	GGCCTTCATTTTCAGGGACC	236	53
FOXP4-AS1	lncRNA	AACCACGTGCACCAAACTTT	GGTTACTAGGTTGCCACGGA	171	53
BRCAT402	lncRNA	TTGCTTGACCAGAACTGTGC	TCAATGCCAGCTACATCCCT	153	53
